# Supplementary material for: Highly Selective Synthesis of 6-Glyoxylamidoquinoline Derivatives via Palladium-Catalyzed Aminocarbonylation
Source: MDPI journal article supplement (doi:10.3390/molecules27010004), 2021-12-21
Supplement: s1 [file s1]

No syntax errors found.  
Please wait while processing ....

[CIF dictionary](#)  
[Interpreting this report](#)

## Datablock: 2n

Bond precision: C-C = 0.0064 Å Wavelength=0.71073  
Cell: a=5.1930(4) b=9.0314(7) c=27.180(2)  
alpha=98.887(4) beta=93.763(4) gamma=97.281(4)  
Temperature: 294 K

|                        | Calculated                      | Reported                           |
|------------------------|---------------------------------|------------------------------------|
| Volume                 | 1244.55(17)                     | 1244.55(17)                        |
| Space group            | P -1                            | P -1                               |
| Hall group             | -P 1                            | -P 1                               |
| Moiety formula         | C16 H12 N2 O                    | 2(C16 H12 N2 O)                    |
| Sum formula            | C16 H12 N2 O                    | C16 H12 N2 O                       |
| Mr                     | 248.28                          | 248.28                             |
| Dx, g cm <sup>-3</sup> | 1.325                           | 1.325                              |
| Z                      | 4                               | 4                                  |
| Mu (mm <sup>-1</sup> ) | 0.085                           | 0.085                              |
| F000                   | 520.0                           | 520.0                              |
| F000'                  | 520.20                          |                                    |
| h, k, lmax             | 6, 10, 32                       | 6, 10, 32                          |
| Nref                   | 4586                            | 4550                               |
| Tmin, Tmax             | 0.981, 0.997                    | 0.740, 1.000                       |
| Tmin'                  | 0.968                           |                                    |
| Correction method=     | # Reported T Limits: Tmin=0.740 |                                    |
| Tmax=1.000 AbsCorr =   | MULTI-SCAN                      |                                    |
| Data completeness=     | 0.992                           | Theta(max)= 25.410                 |
| R(reflections)=        | 0.0991( 3249)                   | wR2(reflections)=<br>0.2079( 4550) |
| S =                    | 1.170                           | Npar= 350                          |

The following ALERTS were generated. Each ALERT has the format  
**test-name ALERT alert-type alert-level.**  
Click on the hyperlinks for more details of the test.

### Alert level C

[RINTA01](#) [ALERT 3 C](#) The value of Rint is greater than 0.12  
Rint given 0.140  
[PLAT020](#) [ALERT 3 C](#) The Value of Rint is Greater Than 0.12 ..... 0.140 Report  
[PLAT340](#) [ALERT 3 C](#) Low Bond Precision on C-C Bonds ..... 0.00641 Ang.  
[PLAT480](#) [ALERT 4 C](#) Long H...A H-Bond Reported H8 ..N51 . 2.66 Ang.  
[PLAT906](#) [ALERT 3 C](#) Large K Value in the Analysis of Variance ..... 31.511 Check  
**And 2 other PLAT906 Alerts**  
More ...  
[PLAT911](#) [ALERT 3 C](#) Missing FCF Refl Between Thmin & STh/L= 0.600 23 Report

### Alert level G

[FORMU01](#) [ALERT 1 G](#) There is a discrepancy between the atom counts in the  
\_chemical\_formula\_sum and \_chemical\_formula\_moiety. This is  
usually due to the moiety formula being in the wrong format.  
Atom count from \_chemical\_formula\_sum: C16 H12 N2 O1  
Atom count from \_chemical\_formula\_moiety: C32 H24 N4 O2  
[PLAT002](#) [ALERT 2 G](#) Number of Distance or Angle Restraints on AtSite 4 Note  
[PLAT042](#) [ALERT 1 G](#) Calc. and Reported Moiety Formula Strings Differ Please Check  
[PLAT154](#) [ALERT 1 G](#) The s.u.'s on the Cell Angles are Equal ..(Note) 0.004 Degree  
[PLAT172](#) [ALERT 4 G](#) The CIF-Embedded .res File Contains DFIX Records 1 Report  
[PLAT860](#) [ALERT 3 G](#) Number of Least-Squares Restraints ..... 2 Note  
[PLAT910](#) [ALERT 3 G](#) Missing # of FCF Reflection(s) Below Theta(Min). 2 Note  
[PLAT912](#) [ALERT 4 G](#) Missing # of FCF Reflections Above STh/L= 0.600 13 Note  
[PLAT933](#) [ALERT 2 G](#) Number of OMIT Records in Embedded .res File ... 23 Note  
[PLAT978](#) [ALERT 2 G](#) Number C-C Bonds with Positive Residual Density. 1 Info

0 **ALERT level A** = Most likely a serious problem - resolve or explain  
0 **ALERT level B** = A potentially serious problem, consider carefully  
8 **ALERT level C** = Check. Ensure it is not caused by an omission or oversight

```
10 ALERT level G = General information/check it is not something unexpected

3 ALERT type 1 CIF construction/syntax error, inconsistent or missing data
3 ALERT type 2 Indicator that the structure model may be wrong or deficient
9 ALERT type 3 Indicator that the structure quality may be low
3 ALERT type 4 Improvement, methodology, query or suggestion
0 ALERT type 5 Informative message, check
```

---

It is advisable to attempt to resolve as many as possible of the alerts in all categories. Often the minor alerts point to easily fixed oversights, errors and omissions in your CIF or refinement strategy, so attention to these fine details can be worthwhile. In order to resolve some of the more serious problems it may be necessary to carry out additional measurements or structure refinements. However, the purpose of your study may justify the reported deviations and the more serious of these should normally be commented upon in the discussion or experimental section of a paper or in the "special\_details" fields of the CIF. checkCIF was carefully designed to identify outliers and unusual parameters, but every test has its limitations and alerts that are not important in a particular case may appear. Conversely, the absence of alerts does not guarantee there are no aspects of the results needing attention. It is up to the individual to critically assess their own results and, if necessary, seek expert advice.

### Publication of your CIF in IUCr journals

A basic structural check has been run on your CIF. These basic checks will be run on all CIFs submitted for publication in IUCr journals (*Acta Crystallographica*, *Journal of Applied Crystallography*, *Journal of Synchrotron Radiation*); however, if you intend to submit to *Acta Crystallographica Section C* or *E* or *IUCrData*, you should make sure that [full publication checks](#) are run on the final version of your CIF prior to submission.

### Publication of your CIF in other journals

Please refer to the *Notes for Authors* of the relevant journal for any special instructions relating to CIF submission.

---

PLATON version of 13/07/2021; check.def file version of 13/07/2021

## Datablock 2n - ellipsoid plot

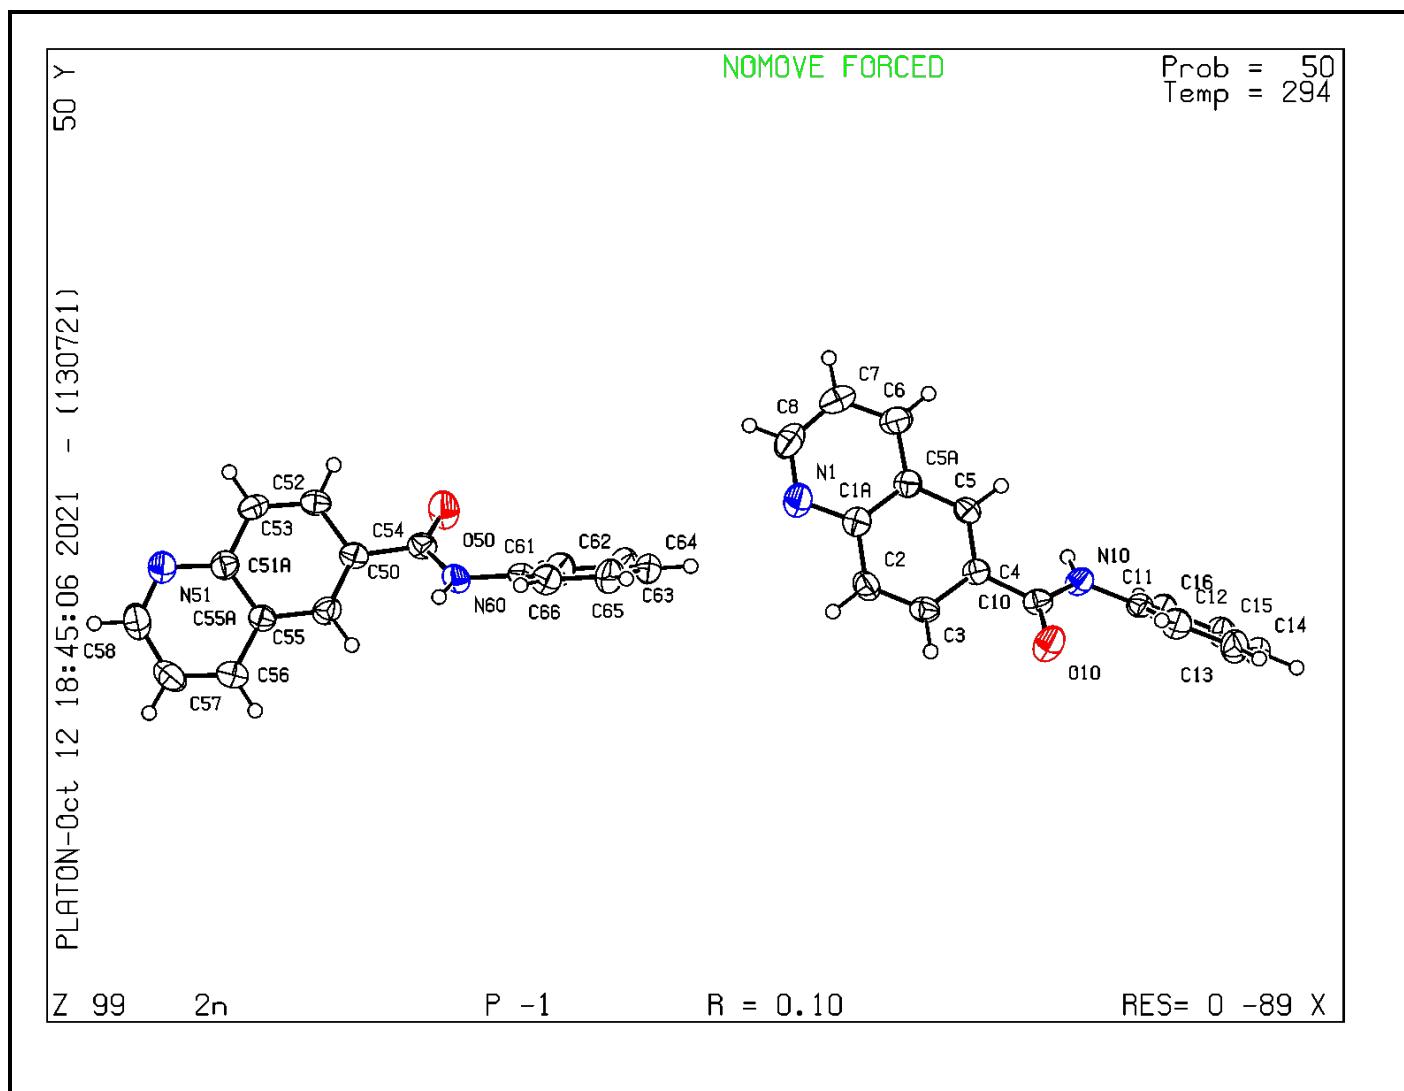

[Download CIF editor \(publCIF\) from the IUCr](#)  
[Download CIF editor \(enCIFer\) from the CCDC](#)  
[Test a new CIF entry](#)
