# Supplementary material for: Highly Selective Synthesis of 6-Glyoxylamidoquinoline Derivatives via Palladium-Catalyzed Aminocarbonylation
Source: MDPI journal article supplement (doi:10.3390/molecules27010004), 2021-12-21
Supplement: s1 [file s1]

## Supporting Information

### Highly Selective Synthesis of 6-Glyoxylamido-Quinoline Derivatives via Palladium-Catalyzed Aminocarbonylation

**Sami Chniti<sup>1</sup>, László Kollár<sup>1, 2, 3</sup>, Attila Bényei<sup>4</sup> and Attila Takács<sup>1, 2\*</sup>**

<sup>1</sup>Department of Inorganic Chemistry, University of Pécs, Ifjúság útja. 6., H-7624, Pécs, Hungary <sup>2</sup>János Szentágothai Research Centre, University of Pécs, Ifjúság útja. 20., H-7624 Pécs, Hungary

<sup>3</sup>MTA-PTE Research Group for Selective Chemical Syntheses, Ifjúság útja., 6., H-7624 Pécs, Hungary,

<sup>4</sup>University of Debrecen, Department of Pharmaceutical Chemistry, Egyetem tér 1, 4032, Hungary

\*Correspondence: [takacsattila@gamma.ttk.pte.hu](mailto:takacsattila@gamma.ttk.pte.hu)

#### Contents

|                                                                             |     |
|-----------------------------------------------------------------------------|-----|
| X-ray Crystallographic Data of compound <b>2c</b>                           | 1.  |
| X-ray Crystallographic Data of compound <b>2n</b>                           | 5.  |
| X-ray Crystallographic Data of compound <b>3g</b>                           | 11. |
| Characterization of the synthesized compounds                               | 16. |
| <sup>1</sup> H and <sup>13</sup> C NMR spectra of the synthesized compounds | 31. |

## X-ray Crystallography

### Computing details

For all compounds, data collection: Bruker Instrument Service vV6.2.6; cell refinement: *APEX3* v2017.3-0 (Bruker AXS); data reduction: *SAINT* V8.38A (Bruker AXS Inc., 2017). Program(s) used to solve structure: *SHELXT* 2014/5 (Sheldrick, 2014) for **(2c)**, **(3g)**; *SHELXT* 2018/2 (Sheldrick, 2018) for **(2n)**. Program(s) used to refine structure: *SHELXL*2018/3 (Sheldrick, 2018) for **(2c)**, **(2n)**; *SHELXL*2016/6 (Sheldrick, 2016) for **(3g)**. For all compounds, molecular graphics: *Mercury*; software used to prepare material for publication: *WinGX*, *publCIF*.

### X-ray Crystallographic Data of compound 2c

#### Crystal data

|                                |                                                         |
|--------------------------------|---------------------------------------------------------|
| $C_{16}H_{18}N_2O$             | $F(000) = 272$                                          |
| $M_r = 254.32$                 | $D_x = 1.276 \text{ Mg m}^{-3}$                         |
| Monoclinic, $P2_1$             | Mo $K\alpha$ radiation, $\lambda = 0.71073 \text{ \AA}$ |
| $a = 5.1616 (4) \text{ \AA}$   | Cell parameters from 232 reflections                    |
| $b = 6.6616 (5) \text{ \AA}$   | $\theta = 3.2\text{--}22.2^\circ$                       |
| $c = 19.2655 (14) \text{ \AA}$ | $\mu = 0.08 \text{ mm}^{-1}$                            |
| $\beta = 92.600 (3)^\circ$     | $T = 294 \text{ K}$                                     |
| $V = 661.75 (9) \text{ \AA}^3$ | Plate, colourless                                       |
| $Z = 2$                        | $0.30 \times 0.17 \times 0.10 \text{ mm}$               |

#### Data collection

|                                                                                                                     |                                                                        |
|---------------------------------------------------------------------------------------------------------------------|------------------------------------------------------------------------|
| Bruker D8 VENTURE diffractometer                                                                                    | 2725 independent reflections                                           |
| Radiation source: microfocus sealed tube, INCOATEC $I\mu S$ 3.0                                                     | 2250 reflections with $I > 2\sigma(I)$                                 |
| Multilayer mirror INCOATEC monochromator                                                                            | $R_{\text{int}} = 0.038$                                               |
| Detector resolution: $7.3910 \text{ pixels mm}^{-1}$                                                                | $\theta_{\text{max}} = 26.4^\circ$ , $\theta_{\text{min}} = 3.2^\circ$ |
| $\omega$ and $\pi$ scan                                                                                             | $h = -6 \rightarrow 6$                                                 |
| Absorption correction: multi-scan <i>SADABS</i> 2016/2 - Bruker AXS area detector scaling and absorption correction | $k = -8 \rightarrow 8$                                                 |
| $T_{\text{min}} = 0.91$ , $T_{\text{max}} = 0.99$                                                                   | $l = -24 \rightarrow 23$                                               |
| 7476 measured reflections                                                                                           |                                                                        |

## Refinement

|                                                                |                                                                                                                                                   |
|----------------------------------------------------------------|---------------------------------------------------------------------------------------------------------------------------------------------------|
| Refinement on $F^2$                                            | Hydrogen site location: mixed                                                                                                                     |
| Least-squares matrix: full                                     | H atoms treated by a mixture of independent and constrained refinement                                                                            |
| $R[F^2 > 2\sigma(F^2)] = 0.052$                                | $w = 1/[\sigma^2(F_o^2) + (0.0736P)^2]$<br>where $P = (F_o^2 + 2F_c^2)/3$                                                                         |
| $wR(F^2) = 0.141$                                              | $(\Delta/\sigma)_{\max} < 0.001$                                                                                                                  |
| $S = 1.15$                                                     | $\Delta_{\max} = 0.51 \text{ e } \text{\AA}^{-3}$                                                                                                 |
| 2725 reflections                                               | $\Delta_{\min} = -0.60 \text{ e } \text{\AA}^{-3}$                                                                                                |
| 176 parameters                                                 | Extinction correction: <i>SHELXL2018/3</i> (Sheldrick 2018)                                                                                       |
| 2 restraints                                                   | Extinction coefficient: 0.16 (2)                                                                                                                  |
| Primary atom site location: structure-invariant direct methods | Absolute structure: Flack x determined using 783 quotients $[(I+)-(I-)]/[(I+)+(I-)]$ (Parsons, Flack and Wagner, Acta Cryst. B69 (2013) 249-259). |
| Secondary atom site location: difference Fourier map           | Absolute structure parameter: 0.4 (9)                                                                                                             |

## Special details

*Geometry.* All esds (except the esd in the dihedral angle between two l.s. planes) are estimated using the full covariance matrix. The cell esds are taken into account individually in the estimation of esds in distances, angles and torsion angles; correlations between esds in cell parameters are only used when they are defined by crystal symmetry. An approximate (isotropic) treatment of cell esds is used for estimating esds involving l.s. planes.

## Geometric parameters ( $\text{\AA}$ , $^\circ$ ) for (2c)

|         |           |          |           |
|---------|-----------|----------|-----------|
| C2—C3   | 1.359 (5) | C11—N10  | 1.458 (4) |
| C2—C1A  | 1.411 (5) | C11—C16  | 1.511 (5) |
| C2—H2   | 0.93      | C11—C12  | 1.513 (5) |
| C1A—N1  | 1.375 (4) | C11—H11  | 0.98      |
| C1A—C5A | 1.407 (4) | C12—C13  | 1.521 (5) |
| C3—C4   | 1.412 (5) | C12—H12A | 0.97      |
| C3—H3   | 0.93      | C12—H12B | 0.97      |
| C4—C5   | 1.371 (5) | C13—C14  | 1.506 (7) |
| C4—C10  | 1.491 (5) | C13—H13A | 0.97      |
| C5—C5A  | 1.410 (5) | C13—H13B | 0.97      |
| C5—H5   | 0.93      | C14—C15  | 1.504 (7) |
| C6—C7   | 1.356 (5) | C14—H14A | 0.97      |

|            |           |               |            |
|------------|-----------|---------------|------------|
| C6—C5A     | 1.412 (5) | C14—H14B      | 0.97       |
| C6—H6      | 0.93      | C15—C16       | 1.518 (6)  |
| C7—C8      | 1.399 (6) | C15—H15A      | 0.97       |
| C7—H7      | 0.93      | C15—H15B      | 0.97       |
| C8—N1      | 1.305 (5) | C16—H16A      | 0.97       |
| C8—H8      | 0.93      | C16—H16B      | 0.97       |
| C10—O10    | 1.235 (4) | N10—H10       | 0.862 (14) |
| C10—N10    | 1.338 (4) |               |            |
|            |           |               |            |
| C3—C2—C1A  | 120.7 (3) | C12—C11—H11   | 107.9      |
| C3—C2—H2   | 119.6     | C11—C12—C13   | 110.8 (3)  |
| C1A—C2—H2  | 119.6     | C11—C12—H12A  | 109.5      |
| N1—C1A—C5A | 122.7 (3) | C13—C12—H12A  | 109.5      |
| N1—C1A—C2  | 118.5 (3) | C11—C12—H12B  | 109.5      |
| C5A—C1A—C2 | 118.8 (3) | C13—C12—H12B  | 109.5      |
| C2—C3—C4   | 121.1 (3) | H12A—C12—H12B | 108.1      |
| C2—C3—H3   | 119.4     | C14—C13—C12   | 111.6 (3)  |
| C4—C3—H3   | 119.4     | C14—C13—H13A  | 109.3      |
| C5—C4—C3   | 118.8 (3) | C12—C13—H13A  | 109.3      |
| C5—C4—C10  | 119.1 (3) | C14—C13—H13B  | 109.3      |
| C3—C4—C10  | 122.1 (3) | C12—C13—H13B  | 109.3      |
| C4—C5—C5A  | 121.4 (3) | H13A—C13—H13B | 108.0      |
| C4—C5—H5   | 119.3     | C15—C14—C13   | 112.0 (4)  |
| C5A—C5—H5  | 119.3     | C15—C14—H14A  | 109.2      |
| C7—C6—C5A  | 119.4 (3) | C13—C14—H14A  | 109.2      |
| C7—C6—H6   | 120.3     | C15—C14—H14B  | 109.2      |
| C5A—C6—H6  | 120.3     | C13—C14—H14B  | 109.2      |
| C1A—C5A—C5 | 119.2 (3) | H14A—C14—H14B | 107.9      |
| C1A—C5A—C6 | 117.4 (3) | C14—C15—C16   | 111.1 (4)  |
| C5—C5A—C6  | 123.4 (3) | C14—C15—H15A  | 109.4      |
| C6—C7—C8   | 118.8 (4) | C16—C15—H15A  | 109.4      |
| C6—C7—H7   | 120.6     | C14—C15—H15B  | 109.4      |
| C8—C7—H7   | 120.6     | C16—C15—H15B  | 109.4      |
| N1—C8—C7   | 124.9 (4) | H15A—C15—H15B | 108.0      |
| N1—C8—H8   | 117.6     | C11—C16—C15   | 111.6 (3)  |



|               |            |                 |            |
|---------------|------------|-----------------|------------|
| C7—C8—H8      | 117.6      | C11—C16—H16A    | 109.3      |
| O10—C10—N10   | 122.4 (3)  | C15—C16—H16A    | 109.3      |
| O10—C10—C4    | 121.0 (3)  | C11—C16—H16B    | 109.3      |
| N10—C10—C4    | 116.6 (3)  | C15—C16—H16B    | 109.3      |
| N10—C11—C16   | 111.5 (3)  | H16A—C16—H16B   | 108.0      |
| N10—C11—C12   | 110.2 (3)  | C8—N1—C1A       | 116.8 (3)  |
| C16—C11—C12   | 111.2 (3)  | C10—N10—C11     | 123.5 (3)  |
| N10—C11—H11   | 107.9      | C10—N10—H10     | 119 (3)    |
| C16—C11—H11   | 107.9      | C11—N10—H10     | 117 (3)    |
|               |            |                 |            |
| C3—C2—C1A—N1  | -178.6 (3) | C3—C4—C10—O10   | 149.1 (4)  |
| C3—C2—C1A—C5A | 1.6 (5)    | C5—C4—C10—N10   | 153.3 (3)  |
| C1A—C2—C3—C4  | -1.3 (6)   | C3—C4—C10—N10   | -29.8 (5)  |
| C2—C3—C4—C5   | -0.6 (5)   | N10—C11—C12—C13 | -179.5 (3) |
| C2—C3—C4—C10  | -177.5 (3) | C16—C11—C12—C13 | -55.4 (4)  |
| C3—C4—C5—C5A  | 2.2 (5)    | C11—C12—C13—C14 | 54.9 (5)   |
| C10—C4—C5—C5A | 179.2 (3)  | C12—C13—C14—C15 | -54.8 (5)  |
| N1—C1A—C5A—C5 | -179.8 (3) | C13—C14—C15—C16 | 54.4 (5)   |
| C2—C1A—C5A—C5 | -0.1 (5)   | N10—C11—C16—C15 | 179.1 (4)  |
| N1—C1A—C5A—C6 | -1.2 (4)   | C12—C11—C16—C15 | 55.7 (5)   |
| C2—C1A—C5A—C6 | 178.6 (3)  | C14—C15—C16—C11 | -54.9 (5)  |
| C4—C5—C5A—C1A | -1.9 (5)   | C7—C8—N1—C1A    | 0.9 (6)    |
| C4—C5—C5A—C6  | 179.5 (3)  | C5A—C1A—N1—C8   | 0.6 (5)    |
| C7—C6—C5A—C1A | 0.2 (5)    | C2—C1A—N1—C8    | -179.1 (3) |
| C7—C6—C5A—C5  | 178.8 (3)  | O10—C10—N10—C11 | -0.3 (5)   |
| C5A—C6—C7—C8  | 1.2 (6)    | C4—C10—N10—C11  | 178.6 (3)  |
| C6—C7—C8—N1   | -1.8 (7)   | C16—C11—N10—C10 | 91.8 (4)   |
| C5—C4—C10—O10 | -27.8 (5)  | C12—C11—N10—C10 | -144.2 (3) |

Hydrogen-bond geometry ( $\text{\AA}$ ,  $^\circ$ ) for (2c)

| $D-H\cdots A$                     | $D-H$    | $H\cdots A$ | $D\cdots A$ | $D-H\cdots A$ |
|-----------------------------------|----------|-------------|-------------|---------------|
| N10—H10 $\cdots$ O10 <sup>i</sup> | 0.86 (1) | 2.19 (2)    | 3.020 (4)   | 161 (4)       |

Symmetry code: (i)  $x+1, y, z$ .

## X-ray Crystallographic Data of compound 2n

### Crystal data

|                                                   |                                                         |
|---------------------------------------------------|---------------------------------------------------------|
| $2(\text{C}_{16}\text{H}_{12}\text{N}_2\text{O})$ | $Z = 4$                                                 |
| $M_r = 248.28$                                    | $F(000) = 520$                                          |
| Triclinic, $P\bar{1}$                             | $D_x = 1.325 \text{ Mg m}^{-3}$                         |
| $a = 5.1930 (4) \text{ \AA}$                      | Mo $K\alpha$ radiation, $\lambda = 0.71073 \text{ \AA}$ |
| $b = 9.0314 (7) \text{ \AA}$                      | Cell parameters from 2891 reflections                   |
| $c = 27.180 (2) \text{ \AA}$                      | $\theta = 3.1\text{--}22.6^\circ$                       |
| $\alpha = 98.887 (4)^\circ$                       | $\mu = 0.09 \text{ mm}^{-1}$                            |
| $\beta = 93.763 (4)^\circ$                        | $T = 294 \text{ K}$                                     |
| $\gamma = 97.281 (4)^\circ$                       | Plate, colourless                                       |
| $V = 1244.55 (17) \text{ \AA}^3$                  | $0.38 \times 0.19 \times 0.04 \text{ mm}$               |

### Data collection

|                                                                                                                   |                                                                        |
|-------------------------------------------------------------------------------------------------------------------|------------------------------------------------------------------------|
| Bruker D8 VENTURE diffractometer                                                                                  | 4550 independent reflections                                           |
| Radiation source: microfocus sealed tube, INCOATEC I $\mu$ S 3.0                                                  | 3249 reflections with $I > 2\sigma(I)$                                 |
| Multilayer mirror INCOATEC monochromator                                                                          | $R_{\text{int}} = 0.140$                                               |
| Detector resolution: $7.3910 \text{ pixels mm}^{-1}$                                                              | $\theta_{\text{max}} = 25.4^\circ$ , $\theta_{\text{min}} = 2.3^\circ$ |
| $\omega$ and $\pi$ scan                                                                                           | $h = -6 \rightarrow 6$                                                 |
| Absorption correction: multi-scan<br>SADABS2016/2 - Bruker AXS area detector<br>scaling and absorption correction | $k = -10 \rightarrow 10$                                               |
| $T_{\text{min}} = 0.74$ , $T_{\text{max}} = 1.00$                                                                 | $l = -32 \rightarrow 32$                                               |
| 41129 measured reflections                                                                                        |                                                                        |

### Refinement

|                                 |                                                                                     |
|---------------------------------|-------------------------------------------------------------------------------------|
| Refinement on $F^2$             | Secondary atom site location: difference Fourier map                                |
| Least-squares matrix: full      | Hydrogen site location: mixed                                                       |
| $R[F^2 > 2\sigma(F^2)] = 0.099$ | H atoms treated by a mixture of independent and constrained refinement              |
| $wR(F^2) = 0.208$               | $w = 1/[\sigma^2(F_o^2) + (0.0442P)^2 + 2.1465P]$<br>where $P = (F_o^2 + 2F_c^2)/3$ |
| $S = 1.17$                      | $(\Delta/\sigma)_{\text{max}} < 0.001$                                              |

|                                                                |                                                                |
|----------------------------------------------------------------|----------------------------------------------------------------|
| 4550 reflections                                               | $\Delta\rho_{\max} = 0.26 \text{ e } \text{\AA}^{-3}$          |
| 350 parameters                                                 | $\Delta\rho_{\min} = -0.22 \text{ e } \text{\AA}^{-3}$         |
| 2 restraints                                                   | Extinction correction: <i>SHELXL2018/3</i><br>(Sheldrick 2018) |
| Primary atom site location: structure-invariant direct methods | Extinction coefficient: 0.0066 (17)                            |

### Special details

*Geometry.* All esds (except the esd in the dihedral angle between two l.s. planes) are estimated using the full covariance matrix. The cell esds are taken into account individually in the estimation of esds in distances, angles and torsion angles; correlations between esds in cell parameters are only used when they are defined by crystal symmetry. An approximate (isotropic) treatment of cell esds is used for estimating esds involving l.s. planes.

### Geometric parameters ( $\text{\AA}$ , $^\circ$ ) for (2n)

|         |           |           |           |
|---------|-----------|-----------|-----------|
| C2—C3   | 1.363 (6) | C50—N60   | 1.349 (5) |
| C2—C1A  | 1.418 (6) | C50—C54   | 1.490 (6) |
| C2—H2   | 0.93      | C52—C53   | 1.350 (6) |
| C1A—N1  | 1.363 (6) | C52—C51A  | 1.419 (6) |
| C1A—C5A | 1.405 (6) | C52—H52   | 0.93      |
| C3—C4   | 1.411 (6) | C51A—N51  | 1.361 (6) |
| C3—H3   | 0.93      | C51A—C55A | 1.417 (6) |
| C4—C5   | 1.362 (6) | C53—C54   | 1.430 (6) |
| C4—C10  | 1.486 (6) | C53—H53   | 0.93      |
| C5—C5A  | 1.412 (6) | C54—C55   | 1.352 (6) |
| C5—H5   | 0.93      | C55—C55A  | 1.406 (6) |
| C6—C7   | 1.352 (6) | C55—H55   | 0.93      |
| C6—C5A  | 1.404 (6) | C56—C57   | 1.353 (6) |
| C6—H6   | 0.93      | C56—C55A  | 1.409 (6) |
| C7—C8   | 1.395 (7) | C56—H56   | 0.93      |
| C7—H7   | 0.93      | C57—C58   | 1.397 (7) |
| C8—N1   | 1.317 (6) | C57—H57   | 0.93      |
| C8—H8   | 0.93      | C58—N51   | 1.313 (6) |
| C10—O10 | 1.230 (5) | C58—H58   | 0.93      |
| C10—N10 | 1.352 (5) | C61—C62   | 1.370 (6) |
| C11—C12 | 1.381 (6) | C61—C66   | 1.387 (6) |
| C11—C16 | 1.385 (6) | C61—N60   | 1.429 (5) |

|            |           |               |            |
|------------|-----------|---------------|------------|
| C11—N10    | 1.420 (5) | C62—C63       | 1.385 (7)  |
| C12—C13    | 1.378 (6) | C62—H62       | 0.93       |
| C12—H12    | 0.93      | C63—C64       | 1.368 (7)  |
| C13—C14    | 1.361 (7) | C63—H63       | 0.93       |
| C13—H13    | 0.93      | C64—C65       | 1.370 (7)  |
| C14—C15    | 1.381 (7) | C64—H64       | 0.93       |
| C14—H14    | 0.93      | C65—C66       | 1.381 (6)  |
| C15—C16    | 1.388 (6) | C65—H65       | 0.93       |
| C15—H15    | 0.93      | C66—H66       | 0.93       |
| C16—H16    | 0.93      | N10—H10       | 0.861 (19) |
| C50—O50    | 1.217 (5) | N60—H60       | 0.86 (2)   |
|            |           |               |            |
| C3—C2—C1A  | 120.1 (4) | C53—C52—H52   | 119.9      |
| C3—C2—H2   | 120.0     | C51A—C52—H52  | 119.9      |
| C1A—C2—H2  | 120.0     | N51—C51A—C55A | 122.7 (4)  |
| N1—C1A—C5A | 122.9 (4) | N51—C51A—C52  | 117.9 (4)  |
| N1—C1A—C2  | 117.7 (4) | C55A—C51A—C52 | 119.3 (4)  |
| C5A—C1A—C2 | 119.4 (4) | C52—C53—C54   | 121.1 (4)  |
| C2—C3—C4   | 121.1 (4) | C52—C53—H53   | 119.4      |
| C2—C3—H3   | 119.5     | C54—C53—H53   | 119.4      |
| C4—C3—H3   | 119.5     | C55—C54—C53   | 118.7 (4)  |
| C5—C4—C3   | 119.0 (4) | C55—C54—C50   | 124.3 (4)  |
| C5—C4—C10  | 123.9 (4) | C53—C54—C50   | 116.9 (4)  |
| C3—C4—C10  | 117.0 (4) | C54—C55—C55A  | 122.3 (4)  |
| C4—C5—C5A  | 121.9 (4) | C54—C55—H55   | 118.8      |
| C4—C5—H5   | 119.1     | C55A—C55—H55  | 118.8      |
| C5A—C5—H5  | 119.1     | C57—C56—C55A  | 118.9 (4)  |
| C7—C6—C5A  | 119.4 (5) | C57—C56—H56   | 120.6      |
| C7—C6—H6   | 120.3     | C55A—C56—H56  | 120.6      |
| C5A—C6—H6  | 120.3     | C55—C55A—C56  | 123.9 (4)  |
| C6—C5A—C1A | 117.4 (4) | C55—C55A—C51A | 118.3 (4)  |
| C6—C5A—C5  | 124.1 (4) | C56—C55A—C51A | 117.8 (4)  |
| C1A—C5A—C5 | 118.5 (4) | C56—C57—C58   | 119.1 (5)  |
| C6—C7—C8   | 119.4 (5) | C56—C57—H57   | 120.4      |
| C6—C7—H7   | 120.3     | C58—C57—H57   | 120.4      |

|               |            |                  |            |
|---------------|------------|------------------|------------|
| C8—C7—H7      | 120.3      | N51—C58—C57      | 125.1 (5)  |
| N1—C8—C7      | 123.9 (4)  | N51—C58—H58      | 117.5      |
| N1—C8—H8      | 118.1      | C57—C58—H58      | 117.5      |
| C7—C8—H8      | 118.1      | C62—C61—C66      | 120.2 (4)  |
| O10—C10—N10   | 123.4 (4)  | C62—C61—N60      | 122.0 (4)  |
| O10—C10—C4    | 120.2 (4)  | C66—C61—N60      | 117.8 (4)  |
| N10—C10—C4    | 116.3 (3)  | C61—C62—C63      | 118.9 (5)  |
| C12—C11—C16   | 120.0 (4)  | C61—C62—H62      | 120.6      |
| C12—C11—N10   | 122.1 (4)  | C63—C62—H62      | 120.6      |
| C16—C11—N10   | 117.8 (4)  | C64—C63—C62      | 121.7 (5)  |
| C13—C12—C11   | 118.9 (4)  | C64—C63—H63      | 119.2      |
| C13—C12—H12   | 120.6      | C62—C63—H63      | 119.2      |
| C11—C12—H12   | 120.6      | C63—C64—C65      | 118.9 (5)  |
| C14—C13—C12   | 122.1 (5)  | C63—C64—H64      | 120.5      |
| C14—C13—H13   | 118.9      | C65—C64—H64      | 120.5      |
| C12—C13—H13   | 118.9      | C64—C65—C66      | 120.7 (5)  |
| C13—C14—C15   | 119.1 (4)  | C64—C65—H65      | 119.6      |
| C13—C14—H14   | 120.5      | C66—C65—H65      | 119.6      |
| C15—C14—H14   | 120.5      | C65—C66—C61      | 119.5 (4)  |
| C14—C15—C16   | 120.2 (4)  | C65—C66—H66      | 120.2      |
| C14—C15—H15   | 119.9      | C61—C66—H66      | 120.2      |
| C16—C15—H15   | 119.9      | C8—N1—C1A        | 117.1 (4)  |
| C11—C16—C15   | 119.7 (4)  | C10—N10—C11      | 125.3 (3)  |
| C11—C16—H16   | 120.1      | C10—N10—H10      | 120 (3)    |
| C15—C16—H16   | 120.1      | C11—N10—H10      | 114 (3)    |
| O50—C50—N60   | 123.8 (4)  | C58—N51—C51A     | 116.5 (4)  |
| O50—C50—C54   | 120.9 (4)  | C50—N60—C61      | 125.1 (3)  |
| N60—C50—C54   | 115.2 (3)  | C50—N60—H60      | 121 (3)    |
| C53—C52—C51A  | 120.2 (4)  | C61—N60—H60      | 112 (3)    |
|               |            |                  |            |
| C3—C2—C1A—N1  | -178.7 (4) | O50—C50—C54—C53  | -35.0 (6)  |
| C3—C2—C1A—C5A | 1.7 (6)    | N60—C50—C54—C53  | 143.3 (4)  |
| C1A—C2—C3—C4  | -1.8 (7)   | C53—C54—C55—C55A | 0.1 (6)    |
| C2—C3—C4—C5   | 0.7 (6)    | C50—C54—C55—C55A | -177.7 (4) |

|                   |            |                   |            |
|-------------------|------------|-------------------|------------|
| C2—C3—C4—C10      | 179.1 (4)  | C54—C55—C55A—C56  | 179.6 (4)  |
| C3—C4—C5—C5A      | 0.5 (6)    | C54—C55—C55A—C51A | -0.9 (6)   |
| C10—C4—C5—C5A     | -177.8 (4) | C57—C56—C55A—C55  | 179.1 (5)  |
| C7—C6—C5A—C1A     | -0.8 (7)   | C57—C56—C55A—C51A | -0.4 (7)   |
| C7—C6—C5A—C5      | -179.9 (5) | N51—C51A—C55A—C55 | -179.0 (4) |
| N1—C1A—C5A—C6     | 0.8 (7)    | C52—C51A—C55A—C55 | 0.3 (6)    |
| C2—C1A—C5A—C6     | -179.6 (4) | N51—C51A—C55A—C56 | 0.5 (7)    |
| N1—C1A—C5A—C5     | 179.9 (4)  | C52—C51A—C55A—C56 | 179.8 (4)  |
| C2—C1A—C5A—C5     | -0.5 (6)   | C55A—C56—C57—C58  | 0.0 (8)    |
| C4—C5—C5A—C6      | 178.5 (4)  | C56—C57—C58—N51   | 0.4 (9)    |
| C4—C5—C5A—C1A     | -0.6 (6)   | C66—C61—C62—C63   | -2.8 (7)   |
| C5A—C6—C7—C8      | 0.3 (8)    | N60—C61—C62—C63   | 179.8 (4)  |
| C6—C7—C8—N1       | 0.3 (8)    | C61—C62—C63—C64   | 1.2 (8)    |
| C5—C4—C10—O10     | 143.7 (5)  | C62—C63—C64—C65   | 0.6 (8)    |
| C3—C4—C10—O10     | -34.7 (6)  | C63—C64—C65—C66   | -0.7 (8)   |
| C5—C4—C10—N10     | -37.5 (6)  | C64—C65—C66—C61   | -0.9 (7)   |
| C3—C4—C10—N10     | 144.1 (4)  | C62—C61—C66—C65   | 2.7 (6)    |
| C16—C11—C12—C13   | -1.8 (7)   | N60—C61—C66—C65   | -179.8 (4) |
| N10—C11—C12—C13   | -179.9 (4) | C7—C8—N1—C1A      | -0.4 (8)   |
| C11—C12—C13—C14   | 0.1 (7)    | C5A—C1A—N1—C8     | -0.2 (7)   |
| C12—C13—C14—C15   | 1.1 (7)    | C2—C1A—N1—C8      | -179.8 (4) |
| C13—C14—C15—C16   | -0.6 (7)   | O10—C10—N10—C11   | 1.3 (7)    |
| C12—C11—C16—C15   | 2.2 (6)    | C4—C10—N10—C11    | -177.5 (4) |
| N10—C11—C16—C15   | -179.6 (4) | C12—C11—N10—C10   | -38.8 (6)  |
| C14—C15—C16—C11   | -1.0 (7)   | C16—C11—N10—C10   | 143.1 (4)  |
| C53—C52—C51A—N51  | -179.6 (4) | C57—C58—N51—C51A  | -0.3 (8)   |
| C53—C52—C51A—C55A | 1.1 (7)    | C55A—C51A—N51—C58 | -0.2 (7)   |
| C51A—C52—C53—     | -1.9 (7)   | C52—C51A—N51—     | -179.4 (5) |

|                 |           |                 |            |
|-----------------|-----------|-----------------|------------|
| C54             |           | C58             |            |
| C52—C53—C54—C55 | 1.3 (7)   | O50—C50—N60—C61 | 1.1 (7)    |
| C52—C53—C54—C50 | 179.3 (4) | C54—C50—N60—C61 | -177.2 (4) |
| O50—C50—C54—C55 | 142.8 (5) | C62—C61—N60—C50 | -38.9 (6)  |
| N60—C50—C54—C55 | -38.9 (6) | C66—C61—N60—C50 | 143.7 (4)  |

*Hydrogen-bond geometry ( $\text{\AA}$ ,  $^\circ$ ) for (2n)*

|                                     |          |             |             |               |
|-------------------------------------|----------|-------------|-------------|---------------|
| $D-H\cdots A$                       | $D-H$    | $H\cdots A$ | $D\cdots A$ | $D-H\cdots A$ |
| C8—H8 $\cdots$ N51 <sup>i</sup>     | 0.93     | 2.66        | 3.557 (6)   | 162           |
| N10—H10 $\cdots$ O10 <sup>ii</sup>  | 0.86 (2) | 2.18 (3)    | 2.999 (4)   | 160 (5)       |
| N60—H60 $\cdots$ O50 <sup>iii</sup> | 0.86 (2) | 2.19 (2)    | 3.020 (4)   | 162 (5)       |

Symmetry codes: (i)  $-x+1, -y+1, -z+1$ ; (ii)  $x-1, y, z$ ; (iii)  $x+1, y, z$ .

## X-ray Crystallographic Data of compound 3g

### Crystal data

|                                |                                                         |
|--------------------------------|---------------------------------------------------------|
| $C_{21}H_{28}N_2O_2$           | $Z = 2$                                                 |
| $M_r = 340.45$                 | $F(000) = 368$                                          |
| Triclinic, $P\bar{1}$          | $D_x = 1.190 \text{ Mg m}^{-3}$                         |
| $a = 5.2074 (9) \text{ \AA}$   | Mo $K\alpha$ radiation, $\lambda = 0.71073 \text{ \AA}$ |
| $b = 11.0289 (18) \text{ \AA}$ | Cell parameters from 223 reflections                    |
| $c = 16.859 (3) \text{ \AA}$   | $\theta = 2.5\text{--}21.1^\circ$                       |
| $\alpha = 79.495 (10)^\circ$   | $\mu = 0.08 \text{ mm}^{-1}$                            |
| $\beta = 86.693 (11)^\circ$    | $T = 300 \text{ K}$                                     |
| $\gamma = 89.903 (9)^\circ$    | Rod, colourless                                         |
| $V = 950.4 (3) \text{ \AA}^3$  | $0.54 \times 0.17 \times 0.07 \text{ mm}$               |

### Data collection

|                                                                                                                   |                                                                        |
|-------------------------------------------------------------------------------------------------------------------|------------------------------------------------------------------------|
| Bruker D8 VENTURE diffractometer                                                                                  | 3507 independent reflections                                           |
| Radiation source: microfocus sealed tube, INCOATEC I $\mu$ S 3.0                                                  | 2145 reflections with $I > 2\sigma(I)$                                 |
| Multilayer mirror INCOATEC monochromator                                                                          | $R_{\text{int}} = 0.193$                                               |
| Detector resolution: 7.3910 pixels $\text{mm}^{-1}$                                                               | $\theta_{\text{max}} = 25.7^\circ$ , $\theta_{\text{min}} = 2.4^\circ$ |
| $\omega$ and $\pi$ scan                                                                                           | $h = -6 \rightarrow 6$                                                 |
| Absorption correction: multi-scan<br>SADABS2016/2 - Bruker AXS area detector<br>scaling and absorption correction | $k = -13 \rightarrow 13$                                               |
| $T_{\text{min}} = 0.42$ , $T_{\text{max}} = 0.99$                                                                 | $l = -20 \rightarrow 20$                                               |
| 20248 measured reflections                                                                                        |                                                                        |

### Refinement

|                                 |                                                                                    |
|---------------------------------|------------------------------------------------------------------------------------|
| Refinement on $F^2$             | Secondary atom site location: difference Fourier map                               |
| Least-squares matrix: full      | Hydrogen site location: mixed                                                      |
| $R[F^2 > 2\sigma(F^2)] = 0.143$ | H atoms treated by a mixture of independent and constrained refinement             |
| $wR(F^2) = 0.359$               | $w = 1/[\sigma^2(F_o^2) + (0.198P)^2 + 0.0785P]$<br>where $P = (F_o^2 + 2F_c^2)/3$ |
| $S = 1.13$                      | $(\Delta/\sigma)_{\text{max}} < 0.001$                                             |
| 3507 reflections                | $\Delta\rho_{\text{max}} = 0.73 \text{ e \AA}^{-3}$                                |



|                                                                |                                                             |
|----------------------------------------------------------------|-------------------------------------------------------------|
| 232 parameters                                                 | $\Delta\rho_{\min} = -0.59 \text{ e } \text{\AA}^{-3}$      |
| 1 restraint                                                    | Extinction correction: <i>SHELXL2018/3</i> (Sheldrick 2018) |
| Primary atom site location: structure-invariant direct methods | Extinction coefficient: 0.55 (8)                            |

### Special details

*Geometry.* All esds (except the esd in the dihedral angle between two l.s. planes) are estimated using the full covariance matrix. The cell esds are taken into account individually in the estimation of esds in distances, angles and torsion angles; correlations between esds in cell parameters are only used when they are defined by crystal symmetry. An approximate (isotropic) treatment of cell esds is used for estimating esds involving l.s. planes.

### Geometric parameters ( $\text{\AA}$ , $^\circ$ ) for (3g)

|         |           |          |           |
|---------|-----------|----------|-----------|
| C2—N1   | 1.323 (6) | C62—H62A | 0.97      |
| C2—C3   | 1.384 (7) | C62—H62B | 0.97      |
| C2—H2   | 0.93      | C63—C64  | 1.506 (6) |
| C3—C4   | 1.348 (7) | C63—H63A | 0.97      |
| C3—H3   | 0.93      | C63—H63B | 0.97      |
| C4—C4A  | 1.415 (6) | C64—C65  | 1.509 (6) |
| C4—H4   | 0.93      | C64—H64A | 0.97      |
| C5—C6   | 1.363 (6) | C64—H64B | 0.97      |
| C5—C4A  | 1.421 (6) | C65—C66  | 1.513 (6) |
| C5—H5   | 0.93      | C65—H65A | 0.97      |
| C4A—C8A | 1.400 (6) | C65—H65B | 0.97      |
| C6—C7   | 1.405 (6) | C66—C67  | 1.498 (7) |
| C6—C10  | 1.479 (6) | C66—H66A | 0.97      |
| C7—C8   | 1.356 (7) | C66—H66B | 0.97      |
| C7—H7   | 0.93      | C67—C68  | 1.511 (6) |
| C8—C8A  | 1.409 (6) | C67—H67A | 0.97      |
| C8—H8   | 0.93      | C67—H67B | 0.97      |
| C8A—N1  | 1.369 (6) | C68—C69  | 1.503 (7) |
| C10—O10 | 1.216 (5) | C68—H68A | 0.97      |
| C10—C11 | 1.536 (6) | C68—H68B | 0.97      |
| C11—O11 | 1.216 (5) | C69—C70  | 1.507 (7) |
| C11—N10 | 1.317 (5) | C69—H69A | 0.97      |
| C61—N10 | 1.465 (5) | C69—H69B | 0.97      |

|             |           |               |           |
|-------------|-----------|---------------|-----------|
| C61—C62     | 1.488 (6) | C70—H70A      | 0.96      |
| C61—H61A    | 0.97      | C70—H70B      | 0.96      |
| C61—H61B    | 0.97      | C70—H70C      | 0.96      |
| C62—C63     | 1.511 (6) | N10—H10       | 0.85 (2)  |
|             |           |               |           |
| N1—C2—C3    | 125.1 (4) | C62—C63—H63B  | 108.6     |
| N1—C2—H2    | 117.5     | H63A—C63—H63B | 107.5     |
| C3—C2—H2    | 117.5     | C63—C64—C65   | 114.9 (4) |
| C4—C3—C2    | 119.3 (5) | C63—C64—H64A  | 108.5     |
| C4—C3—H3    | 120.4     | C65—C64—H64A  | 108.5     |
| C2—C3—H3    | 120.4     | C63—C64—H64B  | 108.5     |
| C3—C4—C4A   | 118.9 (4) | C65—C64—H64B  | 108.5     |
| C3—C4—H4    | 120.6     | H64A—C64—H64B | 107.5     |
| C4A—C4—H4   | 120.6     | C64—C65—C66   | 115.6 (4) |
| C6—C5—C4A   | 120.5 (4) | C64—C65—H65A  | 108.4     |
| C6—C5—H5    | 119.7     | C66—C65—H65A  | 108.4     |
| C4A—C5—H5   | 119.7     | C64—C65—H65B  | 108.4     |
| C8A—C4A—C4  | 117.9 (4) | C66—C65—H65B  | 108.4     |
| C8A—C4A—C5  | 119.0 (4) | H65A—C65—H65B | 107.4     |
| C4—C4A—C5   | 123.1 (4) | C67—C66—C65   | 114.9 (4) |
| C5—C6—C7    | 119.6 (4) | C67—C66—H66A  | 108.5     |
| C5—C6—C10   | 119.5 (4) | C65—C66—H66A  | 108.5     |
| C7—C6—C10   | 120.8 (4) | C67—C66—H66B  | 108.5     |
| C8—C7—C6    | 121.1 (4) | C65—C66—H66B  | 108.5     |
| C8—C7—H7    | 119.4     | H66A—C66—H66B | 107.5     |
| C6—C7—H7    | 119.4     | C66—C67—C68   | 115.8 (4) |
| C7—C8—C8A   | 120.2 (4) | C66—C67—H67A  | 108.3     |
| C7—C8—H8    | 119.9     | C68—C67—H67A  | 108.3     |
| C8A—C8—H8   | 119.9     | C66—C67—H67B  | 108.3     |
| N1—C8A—C4A  | 122.7 (4) | C68—C67—H67B  | 108.3     |
| N1—C8A—C8   | 117.9 (4) | H67A—C67—H67B | 107.4     |
| C4A—C8A—C8  | 119.4 (4) | C69—C68—C67   | 115.2 (4) |
| O10—C10—C6  | 123.5 (4) | C69—C68—H68A  | 108.5     |
| O10—C10—C11 | 118.7 (4) | C67—C68—H68A  | 108.5     |
| C6—C10—C11  | 117.6 (3) | C69—C68—H68B  | 108.5     |

|               |            |                 |            |
|---------------|------------|-----------------|------------|
| O11—C11—N10   | 124.9 (4)  | C67—C68—H68B    | 108.5      |
| O11—C11—C10   | 118.8 (3)  | H68A—C68—H68B   | 107.5      |
| N10—C11—C10   | 116.4 (3)  | C68—C69—C70     | 114.7 (4)  |
| N10—C61—C62   | 113.7 (4)  | C68—C69—H69A    | 108.6      |
| N10—C61—H61A  | 108.8      | C70—C69—H69A    | 108.6      |
| C62—C61—H61A  | 108.8      | C68—C69—H69B    | 108.6      |
| N10—C61—H61B  | 108.8      | C70—C69—H69B    | 108.6      |
| C62—C61—H61B  | 108.8      | H69A—C69—H69B   | 107.6      |
| H61A—C61—H61B | 107.7      | C69—C70—H70A    | 109.5      |
| C61—C62—C63   | 112.5 (4)  | C69—C70—H70B    | 109.5      |
| C61—C62—H62A  | 109.1      | H70A—C70—H70B   | 109.5      |
| C63—C62—H62A  | 109.1      | C69—C70—H70C    | 109.5      |
| C61—C62—H62B  | 109.1      | H70A—C70—H70C   | 109.5      |
| C63—C62—H62B  | 109.1      | H70B—C70—H70C   | 109.5      |
| H62A—C62—H62B | 107.8      | C2—N1—C8A       | 116.1 (4)  |
| C64—C63—C62   | 114.8 (4)  | C11—N10—C61     | 120.2 (4)  |
| C64—C63—H63A  | 108.6      | C11—N10—H10     | 119 (4)    |
| C62—C63—H63A  | 108.6      | C61—N10—H10     | 120 (4)    |
| C64—C63—H63B  | 108.6      |                 |            |
|               |            |                 |            |
| N1—C2—C3—C4   | -0.4 (8)   | C7—C6—C10—C11   | -28.4 (6)  |
| C2—C3—C4—C4A  | -0.7 (8)   | O10—C10—C11—O11 | 138.8 (5)  |
| C3—C4—C4A—C8A | 0.8 (7)    | C6—C10—C11—O11  | -35.9 (6)  |
| C3—C4—C4A—C5  | -178.3 (4) | O10—C10—C11—N10 | -40.2 (6)  |
| C6—C5—C4A—C8A | -2.1 (7)   | C6—C10—C11—N10  | 145.0 (4)  |
| C6—C5—C4A—C4  | 177.0 (4)  | N10—C61—C62—C63 | 178.5 (4)  |
| C4A—C5—C6—C7  | 3.3 (7)    | C61—C62—C63—C64 | -179.8 (4) |
| C4A—C5—C6—C10 | -177.2 (4) | C62—C63—C64—C65 | -179.3 (4) |
| C5—C6—C7—C8   | -1.7 (8)   | C63—C64—C65—C66 | -176.9 (4) |
| C10—C6—C7—C8  | 178.7 (5)  | C64—C65—C66—C67 | 179.8 (4)  |
| C6—C7—C8—C8A  | -1.0 (9)   | C65—C66—C67—C68 | -178.4 (4) |
| C4—C4A—C8A—N1 | 0.1 (7)    | C66—C67—C68—C69 | -179.9 (4) |
| C5—C4A—C8A—N1 | 179.3 (4)  | C67—C68—C69—C70 | -179.2 (5) |
| C4—C4A—C8A—C8 | -179.8 (5) | C3—C2—N1—C8A    | 1.3 (8)    |
| C5—C4A—C8A—C8 | -0.6 (7)   | C4A—C8A—N1—C2   | -1.1 (7)   |

|               |            |                 |           |
|---------------|------------|-----------------|-----------|
| C7—C8—C8A—N1  | -177.7 (5) | C8—C8A—N1—C2    | 178.8 (5) |
| C7—C8—C8A—C4A | 2.1 (8)    | O11—C11—N10—C61 | -1.4 (7)  |
| C5—C6—C10—O10 | -22.4 (7)  | C10—C11—N10—C61 | 177.6 (4) |
| C7—C6—C10—O10 | 157.2 (5)  | C62—C61—N10—C11 | 163.3 (4) |
| C5—C6—C10—C11 | 152.1 (4)  |                 |           |

Hydrogen-bond geometry ( $\text{\AA}$ ,  $^\circ$ ) for (3g)

| $D-H\cdots A$                     | $D-H$    | $H\cdots A$ | $D\cdots A$ | $D-H\cdots A$ |
|-----------------------------------|----------|-------------|-------------|---------------|
| N10—H10 $\cdots$ O11 <sup>i</sup> | 0.85 (2) | 2.24 (3)    | 3.046 (5)   | 159 (5)       |

Symmetry code: (i)  $x-1, y, z$ .

Document origin: *publCIF* [Westrip, S. P. (2010). *J. Apply. Cryst.*, **43**, 920-925].

## Characterization of the synthesized compounds

### *N*-(*tert*-Butyl)-quinoline-6-carboxamide (**2a**)

Yield: 44 mg (8%); brown solid, m.p: 139-141 °C,  $R_f$  (80 % CHCl<sub>3</sub>, 20 % EtOAc) 0.25; IR (KBr,  $\nu$  (cm<sup>-1</sup>)): 3336 *m*, 2978 *w*, 2963 *w*, 1649 *vs*, 1637 *vs*, 1621 *m*, 1543 *m*, 800 *m*. <sup>1</sup>H NMR (500 MHz, CDCl<sub>3</sub>)  $\delta$  8.94 (H<sub>Ar</sub>, *d*, *J* = 3.7 Hz, 1H), 8.20 (H<sub>Ar</sub>, *s*, 1H), 8.16 (H<sub>Ar</sub>, *d*, *J* = 8.2 Hz, 1H), 8.08 (H<sub>Ar</sub>, *d*, *J* = 8.7 Hz, 1H), 7.98 (H<sub>Ar</sub>, *d*, *J* = 8.7 Hz, 1H), 7.42 (H<sub>Ar</sub>, *dd*, *J* = 8.2, 4.2 Hz, 1H), 6.26 (NH, *br s*, 1H), 1.51 (C(CH<sub>3</sub>)<sub>3</sub>, *s*, 9H). <sup>13</sup>C NMR (126 MHz, CDCl<sub>3</sub>)  $\delta$  166.3 (CO), 151.7, 149.1, 136.9, 133.8, 129.8, 127.51, 127.2, 127.1, 121.8, 51.9 (C(CH<sub>3</sub>)<sub>3</sub>), 28.9 (C(CH<sub>3</sub>)<sub>3</sub>). MS (EI): *m/z* (rel. int, %): 228 (25, [M<sup>+</sup>]), 156 (100), 128 (35), 101 (8), 77 (6), 51 (4).

### *N*-(*tert*-Butyl)-2-oxo-2-(quinolin-6-yl)acetamide (**3a**)

Yield: 159 mg (62%); pale-yellow solid, m.p: 119-122 °C,  $R_f$  (85 % CHCl<sub>3</sub>, 15 % EtOAc) 0.55. IR (KBr,  $\nu$  (cm<sup>-1</sup>)): 3201 *w*, 3042 *w*, 2993 *w*, 2969 *m*, 2928 *w*, 2869 *w*, 1688 *vs*, 1664 *vs*, 1622 *s*, 1574 *m*, 1565 *m*, 1459 *m*, 1435 *m*, 1364 *m*, 1241 *w*, 1226 *s*, 1171 *s*, 845 *m*. <sup>1</sup>H NMR (500 MHz, CDCl<sub>3</sub>)  $\delta$  9.19 (H<sub>Ar</sub>, *s*, 1H), 9.00 (H<sub>Ar</sub>, *dd*, *J* = 4, 1.5 Hz, 1H), 8.40 (H<sub>Ar</sub>, *dd*, *J* = 8.9, 1.2 Hz, 1H), 8.30 (H<sub>Ar</sub>, *d*, *J* = 8.2 Hz, 1H), 8.14 (H<sub>Ar</sub>, *d*, *J* = 8.9 Hz, 1H), 7.47 (H<sub>Ar</sub>, *dd*, *J* = 8.2, 4.2 Hz, 1H), 7.11 (NH, *br s*, 1H), 1.49 (C(CH<sub>3</sub>)<sub>3</sub>, *s*, 9H). <sup>13</sup>C NMR (126 MHz, CDCl<sub>3</sub>)  $\delta$  187.4 (CO), 160.9 (CO), 153.2, 150.5, 138.1, 134.7, 131.1, 129.9, 129.3, 127.3, 122.0, 51.8, 28.4. MS (EI): *m/z* (rel. int, %): 256 (1, [M<sup>+</sup>]), 200 (12), 156 (100), 128 (38), 101 (10), 77 (5), 57 (35).

### Piperidin-1-yl-(quinolin-6-yl)methanone (**2b**)

Yield: 39 mg (16%); light oil,  $R_f$  (70 % CHCl<sub>3</sub>, 30 % EtOAc) 0.25; IR (KBr,  $\nu$  (cm<sup>-1</sup>)): 3456 *m/br*, 2938 *w*, 2855 *w*, 1630 *s*, 1620 *s*, 1475 *m*, 1442 *m*, 1275 *m*, 854 *m*. <sup>1</sup>H NMR (500 MHz, CDCl<sub>3</sub>)  $\delta$  8.91 (H<sub>Ar</sub>, *dd*, *J* = 3.5, 1 Hz, 1H), 8.15 (H<sub>Ar</sub>, *d*, *J* = 8.3 Hz, 1H), 8.10 (H<sub>Ar</sub>, *d*, *J* = 8.6 Hz, 1H), 7.85 (H<sub>Ar</sub>, *s*, 1H), 7.68 (H<sub>Ar</sub>, *d*, *J* = 8.6 Hz, 1H), 7.40 (H<sub>Ar</sub>, *dd*, *J* = 8.2, 4.2 Hz, 1H), 3.73 ((CH<sub>2</sub>)<sub>piperidinyl</sub>, *br s*, 2H), 3.34 ((CH<sub>2</sub>)<sub>piperidinyl</sub>, *br s*, 2H), 1.66 (((CH<sub>2</sub>)<sub>2</sub>)<sub>piperidinyl</sub>, *br s*, 4H), 1.50 ((CH<sub>2</sub>)<sub>piperidinyl</sub>, *br s*, 2H). <sup>13</sup>C NMR (126 MHz, CDCl<sub>3</sub>)  $\delta$  169.5 (CO), 151.4, 148.2, 136.5, 134.7, 129.7, 127.8, 127.8, 126.5, 121.8, 48.8, 43.2 (CH<sub>2</sub>)<sub>piperidinyl</sub>, 26.5 (CH<sub>2</sub>)<sub>piperidinyl</sub>, 25.6 (CH<sub>2</sub>)<sub>piperidinyl</sub>, 24.5 ((CH<sub>2</sub>)<sub>2</sub>)<sub>piperidinyl</sub>. MS (EI): *m/z* (rel. int, %): 240 (52, [M<sup>+</sup>]), 239 (100), 207 (2), 156 (7), 128 (56), 101 (20), 44 (4).

### 1-(Piperidin-1-yl)-2-(quinolin-6-yl)ethane-1,2-dione (**3b**)

Yield: 220 mg (82%); orange waxy solid,  $R_f$  (70 % CHCl<sub>3</sub>, 30 % EtOAc) 0.45; IR (KBr,  $\nu$  (cm<sup>-1</sup>)): 2944 *w*, 2866 *w*, 2847 *w*, 1673 *vs*, 1641 *vs*, 1621 *s*, 1446 *w*, 1321 *m*, 1294 *m*, 1246 *m*, 1171 *m*, 1121 *m*, 976 *w*, 841 *m*. <sup>1</sup>H NMR (500 MHz, CDCl<sub>3</sub>)  $\delta$  9.06 (H<sub>Ar</sub>, *dd*, *J* = 4.3, 1.7 Hz, 1H), 8.48 (H<sub>Ar</sub>, *d*, *J* = 1.5 Hz, 1H), 8.34 (H<sub>Ar</sub>, *d*, *J* = 8.3 Hz, 1H), 8.29 (H<sub>Ar</sub>, *dd*, *J* = 8.8, 1.8 Hz, 1H), 8.25 (H<sub>Ar</sub>, *d*, *J* = 8.8 Hz, 1H), 7.55 (H<sub>Ar</sub>, *dd*, *J* = 8.3, 4.3 Hz, 1H), 3.77 ((CH<sub>2</sub>)<sub>piperidinyl</sub>,

*m*, 2H), 3.37 – 3.33 ((CH<sub>2</sub>)<sub>piperidinyl</sub>, *t*, *J* = 5.5 Hz, 2H), 1.76 – 1.72 (((CH<sub>2</sub>)<sub>2</sub>)<sub>piperidinyl</sub>, *m*, 4H), 1.59–1.74 ((CH<sub>2</sub>)<sub>piperidinyl</sub>, *m*, 2H). <sup>13</sup>C NMR (126 MHz, CDCl<sub>3</sub>) δ 191.1 (CO), 165.1 (CO), 153.0, 150.3, 138.2, 132.4, 131.3, 130.4, 127.8, 127.6, 122.3, 47.2 (CH<sub>2</sub>)<sub>piperidinyl</sub>, 42.4 (CH<sub>2</sub>)<sub>piperidinyl</sub>, 26.3 (CH<sub>2</sub>)<sub>piperidinyl</sub>, 25.5 (CH<sub>2</sub>)<sub>piperidinyl</sub>, 24.4 (CH<sub>2</sub>)<sub>piperidinyl</sub>. MS (EI): *m/z* (rel. int, %): 268 (7, [M<sup>+</sup>]), 240 (47), 207 (5), 156 (85), 128 (47), 112 (100), 101 (21), 69 (72) 41 (35).

#### *N*-Cyclohexylquinoline-6-carboxamide (**2c**)

Yield: 33 mg (13%); colorless crystals, m.p: 213–215 °C, *R*<sub>f</sub> (95 % CHCl<sub>3</sub>, 5 % EtOAc) 0.25; IR (KBr, ν (cm<sup>-1</sup>)): 3195 *w*, 3037 *w*, 2923 *m*, 2853 *w*, 1684 *s*, 1657 *vs*, 1622 *m*, 1559 *w*, 1173 *m*, 803 *m*. <sup>1</sup>H NMR (500 MHz, CDCl<sub>3</sub>) δ 8.96 (H<sub>Ar</sub>, *dd*, *J* = 4.2, 1.5 Hz, 1H), 8.29 (H<sub>Ar</sub>, *d*, *J* = 1.7 Hz, 1H), 8.22 (H<sub>Ar</sub>, *d*, *J* = 7.6 Hz, 1H), 8.14 (H<sub>Ar</sub>, *d*, *J* = 8.8 Hz, 1H), 8.05 (H<sub>Ar</sub>, *dd*, *J* = 8.8, 1.9 Hz, 1H), 7.46 (H<sub>Ar</sub>, *dd*, *J* = 8.3, 4.2 Hz, 1H), 6.36 (NH, *d*, *J* = 7.4 Hz, 1H), 4.04 (CH<sub>Cy</sub>, *tdt*, *J* = 11.7, 8.0, 3.9 Hz, 1H), 2.08 ((CH<sub>2</sub>)<sub>Cy</sub>, *dd*, *J* = 12.2, 3.1 Hz, 2H), 1.81 – 1.76 ((CH<sub>2</sub>)<sub>Cy</sub>, *dt*, *J* = 14.0, 3.5 Hz, 2H), 1.70 – 1.65 ((-H<sub>b</sub>CH<sub>a</sub>-)<sub>Cy</sub>, *dt*, *J* = 13.0, 3.5 Hz, 1H), 1.50 – 1.39 ((CH<sub>2</sub>)<sub>Cy</sub>, *m*, 2H), 1.35 – 1.16 ((-H<sub>b</sub>CH<sub>a</sub>-CH<sub>2</sub>)<sub>Cy</sub>, *m*, 3H). <sup>13</sup>C NMR (126 MHz, CDCl<sub>3</sub>) δ 165.9 (CO), 151.6, 148.9, 137.3, 133.1, 129.6, 127.6, 127.5, 127.4, 121.9, 49.1, 33.2 (2×(CH<sub>2</sub>)<sub>Cy</sub>), 25.6, 25.0 (2×(CH<sub>2</sub>)<sub>Cy</sub>). MS (EI): *m/z* (rel. int, %) : 254 (40, [M<sup>+</sup>]), 173 (65), 156 (100), 128 (58), 101 (20), 40 (11).

#### *N*-Cyclohexyl-2-oxo-2-(quinolin-6-yl)acetamide (**3c**)

Yield: 184 mg (65%); pale-yellow waxy solid, *R*<sub>f</sub> (95 % CHCl<sub>3</sub>, 5 % EtOAc) 0.40; IR (KBr, ν (cm<sup>-1</sup>)): 3195 *w*, 3037 *w*, 2923 *m*, 2853 *w*, 1684 *s*, 1657 *vs*, 1622 *m*, 1559 *w*, 1173 *m*, 803 *m*. <sup>1</sup>H NMR (500 MHz, CDCl<sub>3</sub>) δ 9.24 (H<sub>Ar</sub>, *d*, *J* = 1.7 Hz, 1H), 9.03 (H<sub>Ar</sub>, *dd*, *J* = 4.2, 1.6 Hz, 1H), 8.43 (H<sub>Ar</sub>, *dd*, *J* = 8.9, 1.9 Hz, 1H), 8.33 (H<sub>Ar</sub>, *d*, *J* = 7.7 Hz, 1H), 8.17 (H<sub>Ar</sub>, *d*, *J* = 8.9 Hz, 1H), 7.51 (H<sub>Ar</sub>, *dd*, *J* = 8.3, 4.3 Hz, 1H), 7.15 (NH, *d*, *J* = 7.3 Hz, 1H), 3.94 – 3.86 (CH<sub>Cy</sub>, *m*, 1H), 2.03 ((CH<sub>2</sub>)<sub>Cy</sub>, *dd*, *J* = 12.5, 3.4 Hz, 2H), 1.85 – 1.75 ((CH<sub>2</sub>)<sub>Cy</sub>, *m*, 2H), 1.71 – 1.64 ((-H<sub>a</sub>CH<sub>b</sub>-)<sub>Cy</sub>, *m*, 1H), 1.50 – 1.38 ((CH<sub>2</sub>)<sub>Cy</sub>, *m*, 2H), 1.38 – 1.18 ((-H<sub>b</sub>CH<sub>a</sub>-CH<sub>2</sub>)<sub>Cy</sub>, *m*, 3H). <sup>13</sup>C NMR (126 MHz, CDCl<sub>3</sub>) δ 187.0 (CO), 160.7 (CO), 153.0, 150.3, 138.4, 134.8, 131.2, 129.7, 129.3, 127.4, 122.0, 48.7, 32.7 (2×(CH<sub>2</sub>)<sub>Cy</sub>), 25.4, 24.8 (2×(CH<sub>2</sub>)<sub>Cy</sub>). MS (EI): *m/z* (rel. int, %): 282 (13, [M<sup>+</sup>]), 156 (100), 129 (68), 101 (14), 83 (30), 55 (26).

#### Pyrrolidin-1-yl(quinolin-6-yl)methanone (**2d**)

Yield: 57 mg (25%); brownish oil, *R*<sub>f</sub> (70 % CHCl<sub>3</sub>, 30 % EtOAc, 5 % MeOH) 0.60; IR (KBr, ν (cm<sup>-1</sup>)): 3449 *w/br*, 2973 *w*, 2877 *m*, 1628 *vs*, 1612 *vs*, 1588 *m*, 1468 *m*, 1435 *m*, 847 *m*. <sup>1</sup>H NMR (500 MHz, CDCl<sub>3</sub>) δ 8.94 (H<sub>Ar</sub>, *dd*, *J* = 4.2, 1.6 Hz, 1H), 8.18 (H<sub>Ar</sub>, *d*, *J* = 7.9 Hz, 1H), 8.12 (H<sub>Ar</sub>, *d*, *J* = 8.7 Hz, 1H), 7.99 (H<sub>Ar</sub>, *d*, *J* = 1.5 Hz, 1H), 7.83 (H<sub>Ar</sub>, *dd*, *J* = 8.7, 1.8 Hz, 1H), 7.43 (H<sub>Ar</sub>, *dd*, *J* = 8.3, 4.2 Hz, 1H), 3.69 ((CH<sub>2</sub>)<sub>Pyr</sub>, *t*, *J* = 7.0 Hz, 2H), 3.46 ((CH<sub>2</sub>)<sub>Pyr</sub>, *t*, *J* = 6.6 Hz, 2H), 2.03 – 1.94 ((CH<sub>2</sub>)<sub>Pyr</sub>, *qt*, 2H), 1.93 – 1.83 ((CH<sub>2</sub>)<sub>Pyr</sub>, *qt*, 2H). <sup>13</sup>C NMR (126 MHz, CDCl<sub>3</sub>) δ 169.0

(CO), 151.5, 148.4, 136.7, 135.3, 129.6, 128.0, 127.6, 127.0, 121.8, 49.7 ( $\underline{\text{CH}_2}_{\text{Pyr}}$ ), 46.4 ( $\underline{\text{CH}_2}_{\text{Pyr}}$ ), 26.4 ( $\underline{\text{CH}_2}_{\text{Pyr}}$ ), 24.5 ( $\underline{\text{CH}_2}_{\text{Pyr}}$ ). MS (EI):  $m/z$  (rel. int, %): 226 (58,  $[\text{M}^+]$ ), 197 (19), 156 (100), 128 (56), 101 (25), 77 (11), 51 (6).

**1-(Pyrrolidin-1-yl)-2-(quinolin-6-yl)ethane-1,2-dione (3d)**

Yield: 143 mg (56%); brownish waxy solid,  $R_f$  (70 %  $\text{CHCl}_3$ , 30 % EtOAc, 5 % MeOH) 0.40; IR (KBr,  $\nu$  ( $\text{cm}^{-1}$ )): 2964 *w*, 1635 *s*, 1623 *s*, 1457 *w*, 1262 *s*, 1098 *m*, 1019 *m*, 803 *m*.  $^1\text{H}$  NMR (500 MHz,  $\text{CDCl}_3$ )  $\delta$  9.08 ( $\text{H}_{\text{Ar}}$ , *dd*,  $J = 4.2, 1.3$  Hz, 1H), 8.61 ( $\text{H}_{\text{Ar}}$ , *s*, 1H), 8.44 – 8.33 ( $\text{H}_{\text{Ar}}$ , *t*,  $J = 10$  Hz, 2H), 8.28 ( $\text{H}_{\text{Ar}}$ , *d*,  $J = 8.9$  Hz, 1H), 7.57 ( $\text{H}_{\text{Ar}}$ , *dd*,  $J = 8.3, 4.3$  Hz, 1H), 3.74 ( $(\underline{\text{CH}_2})_{\text{Pyr}}$ , *t*,  $J = 6.7$  Hz, 1H), 3.53 ( $(\underline{\text{CH}_2})_{\text{Pyr}}$ , *t*,  $J = 6.4$  Hz, 1H), 2.07 – 1.94 ( $((\underline{\text{CH}_2})_2)_{\text{Pyr}}$ , *m*, 4H).  $^{13}\text{C}$  NMR (126 MHz,  $\text{CDCl}_3$ )  $\delta$  190.3 (CO), 164.2 (CO), 152.2, 149.4, 139.1, 132.9, 131.3, 129.7, 128.6, 127.7, 122.2, 46.9 ( $\underline{\text{CH}_2}_{\text{Pyr}}$ ), 45.6 ( $\underline{\text{CH}_2}_{\text{Pyr}}$ ), 26.0 ( $\underline{\text{CH}_2}_{\text{Pyr}}$ ), 24.0 ( $\underline{\text{CH}_2}_{\text{Pyr}}$ ). MS (EI):  $m/z$  (rel. int, %): 254 (5,  $[\text{M}^+]$ ), 226 (44), 156 (100), 128 (50), 98 (100), 77 (11), 55 (75).

**(4-Methylpiperazin-1-yl)(quinolin-6-yl)methanone (2e)**

Yield: 202 mg (79%); light orange oil,  $R_f$  (40 %  $\text{CHCl}_3$ , 40 % EtOAc, 20 % MeOH) 0.30; IR (KBr,  $\nu$  ( $\text{cm}^{-1}$ )): 3447 *m/br*, 2956 *w*, 2862 *m*, 2853 *w*, 1635 *m*, 1629 *vs*, 1620 *vs*, 1472 *m*, 1261 *m*, 803 *m*.  $^1\text{H}$  NMR (500 MHz,  $\text{CDCl}_3$ )  $\delta$  9.00 ( $\text{H}_{\text{Ar}}$ , *dd*,  $J = 4.2, 1.6$  Hz, 1H), 8.22 ( $\text{H}_{\text{Ar}}$ , *d*,  $J = 7.9$  Hz, 1H), 8.17 ( $\text{H}_{\text{Ar}}$ , *d*,  $J = 8.6$  Hz, 1H), 7.94 ( $\text{H}_{\text{Ar}}$ , *d*,  $J = 1.6$  Hz, 1H), 7.75 ( $\text{H}_{\text{Ar}}$ , *dd*,  $J = 8.6, 1.8$  Hz, 1H), 7.49 ( $\text{H}_{\text{Ar}}$ , *dd*,  $J = 8.3, 4.2$  Hz, 1H), 3.97 ( $(\underline{\text{CH}_2})_{\text{Pyz}}$ , *br s*, 2H), 3.63 ( $(\underline{\text{CH}_2})_{\text{Pyz}}$ , *br s*, 2H), 2.67 ( $(\underline{\text{CH}_2})_{\text{Pyz}}$ , *br s*, 2H), 2.55 ( $(\underline{\text{CH}_2})_{\text{Pyz}}$ , *br s*, 2H), 2.46 (N-CH<sub>3</sub>, *s*, 3H).  $^{13}\text{C}$  NMR (126 MHz,  $\text{CDCl}_3$ )  $\delta$  169.7 (CO), 151.7, 148.5, 136.48, 133.5, 130.1, 127.8, 127.8, 127.1, 122.00, 54.7 (*br*,  $(\underline{\text{CH}_2})_{\text{Pyz}}$ ), 54.7 (*br*,  $(\underline{\text{CH}_2})_{\text{Pyz}}$ ), 47.1 (*br*,  $\underline{\text{CH}_2}_{\text{Pyz}}$ ), 45.5 (N-CH<sub>3</sub>), 41.6 (*br*,  $(\underline{\text{CH}_2})_{\text{Pyz}}$ ). MS (EI):  $m/z$  (rel. int, %): 255 (5,  $[\text{M}^+]$ ), 198 (32), 156 (15), 128 (19), 99 (20), 83 (39), 70 (100), 56 (26).

**1-(4-Methylpiperazin-1-yl)-2-(quinolin-6-yl)ethane-1,2-dione (3e)**

Yield: 187 mg (66%); pale yellow solid, m.p: 140-142 °C,  $R_f$  (33 %  $\text{CHCl}_3$ , 33 % EtOAc, 33 % MeOH) 0.50; IR (KBr,  $\nu$  ( $\text{cm}^{-1}$ )): 2059 *w*, 2801 *w*, 1670 *s*, 1636 *vs*, 1621 *m*, 1447 *m*, 1219 *m*, 1176 *m*, 1120 *m*, 830 *w*, 785 *w*.  $^1\text{H}$  NMR (500 MHz,  $\text{CDCl}_3$ )  $\delta$  9.06 ( $\text{H}_{\text{Ar}}$ , *dd*,  $J = 4.2, 1.6$  Hz, 1H), 8.47 ( $\text{H}_{\text{Ar}}$ , *d*,  $J = 1.6$  Hz, 1H), 8.31 ( $\text{H}_{\text{Ar}}$ , *d*,  $J = 7.5$  Hz, 1H), 8.27 ( $\text{H}_{\text{Ar}}$ , *dd*,  $J = 8.8, 1.9$  Hz, 1H), 8.21 ( $\text{H}_{\text{Ar}}$ , *d*,  $J = 8.8$  Hz, 1H), 7.53 ( $\text{H}_{\text{Ar}}$ , *dd*,  $J = 8.3, 4.2$  Hz, 1H), 3.89 ( $(\underline{\text{CH}_2})_{\text{Pyz}}$ , *br s*, 2H), 3.47 ( $(\underline{\text{CH}_2})_{\text{Pyz}}$ , *t*,  $J = 5.0$  Hz, 2H), 2.60 ( $(\underline{\text{CH}_2})_{\text{Pyz}}$ , *br s*, 2H), 2.46 ( $(\underline{\text{CH}_2})_{\text{Pyz}}$ , *br s*, 2H), 2.37 (N-CH<sub>3</sub>, *s*, 3H).  $^{13}\text{C}$  NMR (126 MHz,  $\text{CDCl}_3$ )  $\delta$  190.7 (CO), 165.1 (CO), 153.5, 150.8, 137.8, 132.7, 130.9, 130.9, 127.5, 127.5, 122.3, 54.98 ( $\underline{\text{CH}_2})_{\text{Pyz}}$ , 54.4 ( $\underline{\text{CH}_2})_{\text{Pyz}}$ , 45.9 (N-CH<sub>3</sub>), 45.8 ( $\underline{\text{CH}_2})_{\text{Pyz}}$ , 41.2 ( $\underline{\text{CH}_2})_{\text{Pyz}}$ . MS (EI):  $m/z$  (rel. int, %): 283 (49,  $[\text{M}^+]$ ), 156 (43), 128 (28), 99 (100), 70 (57), 56 (35), 42 (17).

*N*-Cyclopentylquinoline-6-carboxamide (**2f**)

Yield: 175 mg (73%); yellow solid, m.p: 180-182 °C,  $R_f$  (70 % CHCl<sub>3</sub>, 30 % EtOAc, 2 % MeOH) 0.30; IR (KBr,  $\nu$  (cm<sup>-1</sup>)): 3251 *m*, 3075 *w*, 2959 *w*, 2868 *w*, 1641 *w*, 1629 *s*, 1616 *m*, 1554 *m*, 802 *m*. <sup>1</sup>H NMR (500 MHz, CDCl<sub>3</sub>)  $\delta$  8.92 (H<sub>Ar</sub>, *dd*, *J* = 4.1, 1.4 Hz, 1H), 8.25 (H<sub>Ar</sub>, *d*, *J* = 1.4 Hz, 1H), 8.14 (H<sub>Ar</sub>, *d*, *J* = 8.1 Hz, 1H), 8.08 (H<sub>Ar</sub>, *d*, *J* = 8.8 Hz, 1H), 8.02 (H<sub>Ar</sub>, *dd*, *J* = 8.8, 1.8 Hz, 1H), 7.41 (H<sub>Ar</sub>, *dd*, *J* = 8.3, 4.2 Hz, 1H), 6.64 (NH, *d*, *J* = 6.6 Hz, 1H), 4.48 – 4.39 ((-CH-)Cp, *m*, 1H), 2.16 – 2.03 ((CH<sub>2</sub>)Cp, *m*, 2H), 1.80 – 1.69 ((CH<sub>2</sub>)Cp, *m*, 2H), 1.69 – 1.60 ((CH<sub>2</sub>)Cp, *m*, 2H), 1.60 – 1.49 ((CH<sub>2</sub>)Cp, *m*, 2H). <sup>13</sup>C NMR (126 MHz, CDCl<sub>3</sub>)  $\delta$  166.5 (CO), 151.6, 148.9, 137.1, 132.9, 129.6, 127.5, 127.5, 127.4, 121.8, 52.0 (-CH-)Cp, 33.2 (2×(CH<sub>2</sub>)Cp), 23.9 (2×(CH<sub>2</sub>)Cp). MS (EI): *m/z* (rel. int, %): 240 (44, [M<sup>+</sup>]), 173 (45), 156 (100), 128 (61), 101 (22), 77 (10), 40 (10).

*N*-Cyclopentyl-2-oxo-2-(quinolin-6-yl)acetamide (**3f**)

Yield: 145 mg (54%); light oil,  $R_f$  (70 % CHCl<sub>3</sub>, 30 % EtOAc, 5 % MeOH) 0.40; IR (KBr,  $\nu$  (cm<sup>-1</sup>)): 3292 *m*, 3063 *w*, 2956 *w*, 2870 *w*, 1684 *w*, 1675 *vs*, 1649 *vs*, 1621 *w*, 1539 *w*, 1169 *m*, 810 *w*. <sup>1</sup>H NMR (500 MHz, CDCl<sub>3</sub>)  $\delta$  9.32 (H<sub>Ar</sub>, *d*, *J* = 1.5 Hz, 1H), 9.07 (H<sub>Ar</sub>, *dd*, *J* = 4.3, 1.6 Hz, 1H), 8.49 (H<sub>Ar</sub>, *dd*, *J* = 8.9, 1.8 Hz, 1H), 8.42 (H<sub>Ar</sub>, *d*, *J* = 8.2 Hz, 1H), 8.27 (H<sub>Ar</sub>, *d*, *J* = 8.9 Hz, 1H), 7.57 (H<sub>Ar</sub>, *dd*, *J* = 8.2, 4.3 Hz, 1H), 7.18 (NH, *d*, *J* = 4.8 Hz, 1H), 4.40 – 4.31 ((-CH-)Cp, *m*, 1H), 2.13 ((CH<sub>2</sub>)Cp, *td*, *J* = 12.8, 7.1 Hz, 2H), 1.80 ((CH<sub>2</sub>)Cp, *dt*, *J* = 17.3, 9.0 Hz, 2H), 1.76 – 1.66 ((CH<sub>2</sub>)Cp, *m*, 2H), 1.59 (*dt*, *J* = 20.3, 7.1 Hz, 2H). <sup>13</sup>C NMR (126 MHz, CDCl<sub>3</sub>)  $\delta$  186.2 (CO), 160.7 (CO), 150.1, 141.6, 134.7, 132.3, 131.3, 127.7, 127.4, 127.3, 121.8, 51.5 (-CH-)Cp, 33.0 (2×(CH<sub>2</sub>)Cp), 23.8 (2×(CH<sub>2</sub>)Cp). MS (EI): *m/z* (rel. int, %): 268 (19, [M<sup>+</sup>]), 156 (100), 129 (52), 101 (15), 77 (7), 69 (30), 41 (14).

*N*-Decylquinoline-6-carboxamide (**2g**)

Yield: 178 mg (57%); pale yellow crystals, m.p: 76-78 °C,  $R_f$  (90 % CHCl<sub>3</sub>, 10 % EtOAc) 0.30; IR (KBr,  $\nu$  (cm<sup>-1</sup>)): 3320 *s*, 2922 *s*, 2850 *m*, 1637 *vs*, 1617 *m*, 1534 *vs*, 1494 *s*, 845 *s*. <sup>1</sup>H NMR (500 MHz, CDCl<sub>3</sub>)  $\delta$  8.99 – 8.94 (H<sub>Ar</sub>, *dd*, *J* = 3.5, 1.0 Hz, 1H), 8.30 (H<sub>Ar</sub>, *s*, 1H), 8.20 (H<sub>Ar</sub>, *d*, *J* = 8.2 Hz, 1H), 8.13 (H<sub>Ar</sub>, *d*, *J* = 8.8 Hz, 1H), 8.05 (H<sub>Ar</sub>, *dd*, *J* = 8.8, 1.6 Hz, 1H), 7.45 (H<sub>Ar</sub>, *dd*, *J* = 8.3, 4.2 Hz, 1H), 6.58 (NH, *br s*, 1H), 3.51 ((CH<sub>2</sub>)Hex, *qd*, *J* = 6.8 Hz, 2H), 1.70 – 1.61 ((CH<sub>2</sub>)Hex, *m*, 2H), 1.44 – 1.19 (7×(CH<sub>2</sub>)Hex, *m*, 14H), 0.88 ((CH<sub>3</sub>)Hex, *t*, *J* = 6.8 Hz, 3H). <sup>13</sup>C NMR (126 MHz, CDCl<sub>3</sub>)  $\delta$  166.9 (CO), 151.9, 149.2, 137.0, 132.8, 129.9, 127.6, 127.5, 127.1, 121.9, 40.4 (CH<sub>2</sub>)Hex, 31.9 (CH<sub>2</sub>)Hex, 29.7 (CH<sub>2</sub>)Hex, 29.6 (2×(CH<sub>2</sub>)Hex), 29.4 (CH<sub>2</sub>)Hex, 29.3 (CH<sub>2</sub>)Hex, 27.1 (CH<sub>2</sub>)Hex, 22.7 (CH<sub>2</sub>)Hex, 14.1 (CH<sub>3</sub>)Hex. MS (EI): *m/z* (rel. int, %): MS *m/z* (rel. int.): 312 (12, [M<sup>+</sup>]), 269 (2), 227 (14), 199 (10), 156 (100).



*N-Decyl-2-oxo-2-(quinolin-6-yl)acetamide (3g)*

Yield: 275 mg (81%); pale yellow solid, m.p: 89-92 °C,  $R_f$  (90 % CHCl<sub>3</sub>, 10 % EtOAc) 0.50; IR (KBr,  $\nu$  (cm<sup>-1</sup>)): 3313 *m*, 2954 *w*, 2919 *s*, 2850 *s*, 1689 *m*, 1643 *vs*, 1617 *m*, 1572 *w*, 1527 *m*, 1474 *w*, 1461 *w*, 1170 *m*, 1120 *m*, 921 *w*, 817 *m*, 800 *w*. <sup>1</sup>H NMR (500 MHz, CDCl<sub>3</sub>)  $\delta$  9.16 (H<sub>Ar</sub>, *d*, *J* = 1.7 Hz, 1H), 8.98 (H<sub>Ar</sub>, *dd*, *J* = 4.2, 1.6 Hz, 1H), 8.37 (H<sub>Ar</sub>, *dd*, *J* = 8.9, 1.8 Hz, 1H), 8.25 (H<sub>Ar</sub>, *d*, *J* = 8.2 Hz, 1H), 8.10 (H<sub>Ar</sub>, *d*, *J* = 8.9 Hz, 1H), 7.43 (H<sub>Ar</sub>, *dd*, *J* = 8.3, 4.2 Hz, 1H), 7.41 (NH, *br s*, 1H), 3.40 ((CH<sub>2</sub>)<sub>Hex</sub>, *qd*, *J* = 6.9 Hz, 2H), 1.68 – 1.53 ((CH<sub>2</sub>)<sub>Hex</sub>, *qt*, 2H), 1.33 – 1.16 ((CH<sub>2</sub>)<sub>Hex</sub>, *m*, 14H), 0.84 ((CH<sub>3</sub>)<sub>Hex</sub>, *t*, *J* = 6.9 Hz, 3H). <sup>13</sup>C NMR (126 MHz, CDCl<sub>3</sub>)  $\delta$  186.9 (CO), 161.7 (CO), 153.2, 150.5, 138.1, 134.7, 131.1, 129.9, 129.0, 127.328, 122.0, 39.6 (CH<sub>2</sub>)<sub>Hex</sub>, 31.9 (CH<sub>2</sub>)<sub>Hex</sub>, 29.6 (CH<sub>2</sub>)<sub>Hex</sub>, 29.5 (CH<sub>2</sub>)<sub>Hex</sub>, 29.3 (CH<sub>2</sub>)<sub>Hex</sub>, 29.3 (CH<sub>2</sub>)<sub>Hex</sub>, 29.2 (CH<sub>2</sub>)<sub>Hex</sub>, 26.9 (CH<sub>2</sub>)<sub>Hex</sub>, 22.7 (CH<sub>2</sub>)<sub>Hex</sub>, 14.1 (CH<sub>3</sub>)<sub>Hex</sub>. MS (EI): *m/z* (rel. int, %): 340 (7, [M<sup>+</sup>]), 156 (100), 129 (23), 101(7), 43 (9).

*Methyl (quinoline-6-carbonyl)glycinate (2h)*

Yield: 194 mg (80%); yellow solid, m.p: 125-127 °C,  $R_f$  (70 % CHCl<sub>3</sub>, 30 % EtOAc) 0.30; IR (KBr,  $\nu$  (cm<sup>-1</sup>)): 3277 *m/br*, 2920 *w*, 1751 *vs*, 1749 *vs*, 1650 *s*, 1622 *m*, 1541 *s*, 1498 *m*, 1205 *s*, 838 *m*. <sup>1</sup>H NMR (500 MHz, CDCl<sub>3</sub>)  $\delta$  8.98 (H<sub>Ar</sub>, *dd*, *J* = 4.2, 1.7 Hz, 1H), 8.33 (H<sub>Ar</sub>, *d*, *J* = 1.6 Hz, 1H), 8.21 (H<sub>Ar</sub>, *dd*, *J* = 8.3, 0.9 Hz, 1H), 8.12 (H<sub>Ar</sub>, *d*, *J* = 8.8 Hz, 1H), 8.08 (H<sub>Ar</sub>, *dd*, *J* = 8.8, 1.9 Hz, 1H), 7.46 (H<sub>Ar</sub>, *dd*, *J* = 8.3, 4.3 Hz, 1H), 7.25 (NH, *br s*, 1H), 4.31 ((CH<sub>2</sub>)<sub>Gly</sub>, *d*, *J* = 5.2 Hz, 2H), 3.82 (O-CH<sub>3</sub>, *s*, 3H). <sup>13</sup>C NMR (126 MHz, CDCl<sub>3</sub>)  $\delta$  170.6 (CO), 166.9 (CO), 151.8, 149.0, 137.4, 131.7, 129.7, 127.9, 127.5, 127.3, 122.0, 52.6 (CH<sub>2</sub>)<sub>Gly</sub>, 41.9 (O-CH<sub>3</sub>). MS (EI): *m/z* (rel. int, %): 244 (25, [M<sup>+</sup>]), 207 (13) 185 (16), 156 (100), 128 (46), 101(18), 40 (45).

*Methyl (2-oxo-2-(quinolin-6-yl)acetyl)glycinate (3h)*

Yield: 155 mg (57%); pale yellow solid, m.p: 77-80 °C,  $R_f$  (90 % CHCl<sub>3</sub>, 10 % EtOAc, 1 % MeOH) 0.30; IR (KBr,  $\nu$  (cm<sup>-1</sup>)): 3428 *m/br*, 3031 *w*, 2923 *w*, 2919 *w*, 2844 *w*, 1757 *vs*, 1680 *w*, 1652 *m*, 1454 *w*, 1215 *m*, 1174 *s*, 1119 *s*, 921 *w*, 851 *w*. <sup>1</sup>H NMR (500 MHz, CDCl<sub>3</sub>)  $\delta$  9.00 (H<sub>Ar</sub>, *s*, 1H), 8.91 (H<sub>Ar</sub>, *dd*, *J* = 4.0, 1.0 Hz, 1H), 8.28 (H<sub>Ar</sub>, *dd*, *J* = 8.9, 1.3 Hz, 1H), 8.18 (H<sub>Ar</sub>, *d*, *J* = 8.2 Hz, 1H), 8.06 (NH, *br s*, 1H), 8.02 (H<sub>Ar</sub>, *d*, *J* = 8.9 Hz, 1H), 7.38 (H<sub>Ar</sub>, *dd*, *J* = 8.2, 4.2 Hz, 1H), 4.18 ((CH<sub>2</sub>)<sub>Gly</sub>, *d*, *J* = 5.8 Hz, 2H), 3.73 ((OCH<sub>3</sub>)<sub>Gly</sub>, *s*, 3H). <sup>13</sup>C NMR (126 MHz, CDCl<sub>3</sub>)  $\delta$  186.0 (CO), 169.4 (CO), 162.1 (CO), 153.3, 150.4, 138.1, 134.6, 130.7, 129.8, 128.8, 127.2, 122.0, 52.5 (CH<sub>2</sub>)<sub>Gly</sub>, 41.1 (O-CH<sub>3</sub>). MS (EI): *m/z* (rel. int, %): 272 (10, [M<sup>+</sup>]), 156 (100), 128 (50), 101(18).

*Methyl (quinoline-6-carbonyl)-L-alaninate (2i)*

Yield: 178 mg (69%); yellow waxy solid,  $R_f$  (70 % CHCl<sub>3</sub>, 30 % EtOAc, 2 % MeOH) 0.20; IR (KBr,  $\nu$  (cm<sup>-1</sup>)): 3266 *m/br*, 2953 *w*, 1751 *vs*, 1658 *s*, 1539 *s*, 1501 *s*, 1300 *m*, 1050 *m*, 843 *m*. <sup>1</sup>H NMR (500 MHz, CDCl<sub>3</sub>)  $\delta$  8.95

(H<sub>Ar</sub>, *dd*, *J* = 4.2, 1.5 Hz, 1H), 8.30 (H<sub>Ar</sub>, *d*, *J* = 1.5 Hz, 1H), 8.18 (H<sub>Ar</sub>, *dd*, *J* = 8.2, 0.9 Hz, 1H), 8.09 (H<sub>Ar</sub>, *d*, *J* = 8.8 Hz, 1H), 8.06 (H<sub>Ar</sub>, *dd*, *J* = 8.8, 1.8 Hz, 1H), 7.43 (H<sub>Ar</sub>, *dd*, *J* = 8.3, 4.2 Hz, 1H), 7.26 (NH, *s*, 1H), 4.85 ((-CH-)<sub>Ala</sub>, *p*, *J* = 7.2 Hz, 1H), 3.80 ((OCH<sub>3</sub>)<sub>Ala</sub>, *s*, 3H), 1.56 ((CH<sub>3</sub>)<sub>Ala</sub>, *d*, *J* = 7.2 Hz, 3H). <sup>13</sup>C NMR (126 MHz, CDCl<sub>3</sub>) δ 173.7 (CO), 166.3 (CO), 151.8, 149.0, 137.3, 131.8, 129.6, 127.9, 127.5, 127.4, 121.9, 52.7 (-CH-)<sub>Ala</sub>, 48.7 (OCH<sub>3</sub>)<sub>Ala</sub>, 18.4 (CH<sub>3</sub>)<sub>Ala</sub>. MS (EI): *m/z* (rel. int, %): 258 (6, [M<sup>+</sup>]), 199 (42), 156 (100), 128 (40), 101(16), 77 (7), 44 (14), 40 (16).

*Methyl (2-oxo-2-(quinolin-6-yl)acetyl)-L-alaninate (3i)*

Yield: 86 mg (30%); light oil, R<sub>f</sub> (70 % CHCl<sub>3</sub>, 30 % EtOAc) 0.30; IR (KBr, ν (cm<sup>-1</sup>)): 3369 *w/br*, 2956 *w*, 1745 *s*, 1667 *vs*, 1620 *m*, 1522 *m*, 1458 *m*, 1215 *m*, 1172 *s*, 850 *w*. <sup>1</sup>H NMR (500 MHz, CDCl<sub>3</sub>): δ 9.17 (H<sub>Ar</sub>, *dd*, *J* = 7.0, 1.9 Hz, 1H), 9.08 – 8.97 (H<sub>Ar</sub>, *m*, 1H), 8.48 – 8.36 (H<sub>Ar</sub>, *m*, 1H), 8.32 (H<sub>Ar</sub>, *t*, *J* = 6.1 Hz, 1H), 8.16 (H<sub>Ar</sub>, *dd*, *J* = 10.1, 5.5 Hz, 1H), 7.78 (NH, *s*, 1H), 7.51 (H<sub>Ar</sub>, *d*, *J* = 10.8 Hz, 1H), 4.72 ((-CH-)<sub>Ala</sub>, *pd*, *J* = 7.3, 1.5 Hz, 1H), 3.82 ((CH<sub>3</sub>)<sub>Ala</sub>, *d*, *J* = 2.2 Hz, 3H), 1.57 ((OCH<sub>3</sub>)<sub>Ala</sub>, *dd*, *J* = 7.1, 2.2 Hz, 3H). <sup>13</sup>C NMR (126 MHz, CDCl<sub>3</sub>): δ 185.9 (CO), 172.4 (CO), 161.1 (CO), 153.1, 150.3, 138.4, 134.7, 130.9, 129.8, 129.1, 127.3, 122.1, 52.7 (-CH-)<sub>Ala</sub>, 48.3 (OCH<sub>3</sub>)<sub>Ala</sub>, 18.0 (CH<sub>3</sub>)<sub>Ala</sub>. MS (EI): *m/z* (rel. int, %): 286 (7, [M<sup>+</sup>]), 199 (42), 156 (100), 128 (44), 101(18), 77 (7), 44 (6), 40 (6).

*Methyl (quinoline-6-carbonyl)-L-valinate (2j)*

Yield: 135 mg (47%); pale yellow solid, m.p: 99-101 °C, R<sub>f</sub> (85 % CHCl<sub>3</sub>, 15 % EtOAc) 0.20; IR (KBr, ν (cm<sup>-1</sup>)): 3447 *s/br*, 2965 *m*, 1743 *vs*, 1653 *vs*, 1647 *s*, 1539 *s*, 1497 *m*, 1202 *m*, 1050 *m*, 801 *m*. <sup>1</sup>H NMR (500 MHz, CDCl<sub>3</sub>) δ 8.94 (H<sub>Ar</sub>, *dd*, *J* = 4.1, 1.5 Hz, 1H), 8.27 (H<sub>Ar</sub>, *d*, *J* = 1.4 Hz, 1H), 8.16 (H<sub>Ar</sub>, *d*, *J* = 8.2 Hz, 1H), 8.09 (H<sub>Ar</sub>, *d*, *J* = 8.8 Hz, 1H), 8.05 (H<sub>Ar</sub>, *dd*, *J* = 8.8, 1.8 Hz, 1H), 7.41 (H<sub>Ar</sub>, *dd*, *J* = 8.3, 4.2 Hz, 1H), 7.03 (H<sub>Ar</sub>, *d*, *J* = 8.4 Hz, 1H), 4.81 ((-CH-)<sub>Val</sub>, *dd*, *J* = 8.6, 5.1 Hz, 1H), 3.77 ((OCH<sub>3</sub>)<sub>Val</sub>, *s*, 3H), 2.30 ((CH(CH<sub>3</sub>)<sub>a,b</sub>)<sub>Val</sub>, *m*, 1H), 1.03 (((CH<sub>3</sub>)<sub>b</sub>-CH(CH<sub>3</sub>)<sub>a</sub>)<sub>Val</sub>, *d*, *J* = 6.5 Hz, 3H), 1.00 (((CH<sub>3</sub>)<sub>b</sub>-CH(CH<sub>3</sub>)<sub>a</sub>)<sub>Val</sub>, *d*, *J* = 7.0 Hz, 3H). <sup>13</sup>C NMR (126 MHz, CDCl<sub>3</sub>) δ 172.7 (CO), 166.8 (CO), 152.0, 149.3, 137.0, 132.0, 129.9, 127.8, 127.5, 127.2, 121.9, 57.7 (OCH<sub>3</sub>)<sub>Val</sub>, 52.3 (-CH-)<sub>Val</sub>, 31.6 (CH(CH<sub>3</sub>)<sub>a,b</sub>)<sub>Val</sub>, 19.1 ((CH<sub>3</sub>)<sub>b</sub>-CH(CH<sub>3</sub>)<sub>a</sub>)<sub>Val</sub>, 18.1 ((CH<sub>3</sub>)<sub>b</sub>-CH(CH<sub>3</sub>)<sub>a</sub>)<sub>Val</sub>. MS (EI): *m/z* (rel. int, %): 286 (4, [M<sup>+</sup>]), 172 (20), 156 (100), 128 (35), 101(13).

*Methyl (2-oxo-2-(quinolin-6-yl)acetyl)-L-valinate (3j)* (Title compound not completely separated from byproduct).

Yield: 73 mg (23%); light oil, R<sub>f</sub> (85 % CHCl<sub>3</sub>, 15 % EtOAc) 0.30; IR (KBr, ν (cm<sup>-1</sup>)): 3401 *w/br*, 2965 *w*, 1743 *s*, 1669 *vs*, 1620 *m*, 1540 *m*, 1459 *w*, 1436 *w*, 1274 *w*, 1211 *w*, 1169 *m*, 813 *w*. <sup>1</sup>H NMR (500 MHz, CDCl<sub>3</sub>) δ 9.24 (NH, *d*, *J* = 1.5 Hz, 1H), 9.06 (H<sub>Ar</sub>, *dd*, *J* = 4.2, 1.4 Hz, 1H), 8.47 (H<sub>Ar</sub>, *dd*, *J* = 8.9, 1.8 Hz, 1H), 8.38 (H<sub>Ar</sub>, *d*, *J* = 8.2 Hz, 1H), 8.23 (H<sub>Ar</sub>, *d*, *J* = 8.9 Hz, 1H), 7.69 (H<sub>Ar</sub>, *d*, *J* = 8.8 Hz, 1H), 7.55 (H<sub>Ar</sub>, *dd*, *J* = 8.3, 4.3 Hz, 1H), 4.66 ((-CH-)<sub>Val</sub>, *dd*, *J* = 9.0, 5.0 Hz, 1H), 3.82 ((OCH<sub>3</sub>)<sub>Val</sub>, *s*, 3H), 2.41 – 2.28 ((CH(CH<sub>3</sub>)<sub>a,b</sub>)<sub>Val</sub>, *m*, 1H), 1.06 (((CH<sub>3</sub>)<sub>b</sub>-

CH(CH<sub>3</sub>)<sub>a</sub>)<sub>Val</sub>, *d*, *J* = 6.9 Hz, 3H), 1.03 (((CH<sub>3</sub>)<sub>b</sub>CH(CH<sub>3</sub>)<sub>a</sub>)<sub>Val</sub>, *d*, *J* = 6.9 Hz, 3H). <sup>13</sup>C NMR (126 MHz, CDCl<sub>3</sub>) δ 185.9 (CO), 171.4 (CO), 161.3 (CO), 152.9, 140.0, 138.8, 134.8, 131.2, 129.6, 129.5, 127.4, 122.1, 57.5 (OCH<sub>3</sub>)<sub>Val</sub>, 52.4 (-\*CH-)<sub>Val</sub>, 31.5 (CH(CH<sub>3</sub>)<sub>a,b</sub>)<sub>Val</sub>, 19.1 ((CH<sub>3</sub>)<sub>b</sub>-CH(CH<sub>3</sub>)<sub>a</sub>)<sub>Val</sub>, 17.8 ((CH<sub>3</sub>)<sub>b</sub>-CH(CH<sub>3</sub>)<sub>a</sub>)<sub>Val</sub>. MS (EI): *m/z* (rel. int, %): 314 (14, [M<sup>+</sup>]), 277 (16), 207 (8), 156 (100), 128 (40), 101(14).

*Methyl (L)-2-phenyl-2-(quinoline-6-carboxamido)acetate (2k)*

Yield: 118 mg (37%); light oil, *R<sub>f</sub>* (85 % CHCl<sub>3</sub>, 15 % EtOAc) 0.20; IR (KBr, ν (cm<sup>-1</sup>)): 3247 *w/br*, 2954 *w*, 1741 *vs*, 1641 *s*, 1621 *m*, 1540 *s*, 1501 *m*, 1318 *m*, 1095 *m*, 739 *m*. <sup>1</sup>H NMR (500 MHz, CDCl<sub>3</sub>) δ 8.93 (H<sub>Ar</sub>, *dd*, *J* = 4.1, 1.4 Hz, 1H), 8.31 (H<sub>Ar</sub>, *s*, 1H), 8.14 (H<sub>Ar</sub>, *d*, *J* = 8.2 Hz, 1H), 8.09 – 8.05 (H<sub>Ar</sub>, *m*, 2H), 7.62 (NH, *d*, *J* = 6.8 Hz, 1H), 7.47 (H<sub>Ar</sub>, *d*, *J* = 7.1 Hz, 2H), 7.41 (H<sub>Ar</sub>, *dd*, *J* = 8.3, 4.2 Hz, 1H), 7.38-7.43 (H<sub>Ar</sub>, *m*, 3H), 5.84 ((- \*CH-)<sub>Phe</sub>, *d*, *J* = 7.0 Hz, 1H), 3.77 ((OCH<sub>3</sub>)<sub>Phe</sub>, *s*, 3H). <sup>13</sup>C NMR (126 MHz, CDCl<sub>3</sub>) δ 171.5 (CO), 166.1 (CO), 152.1, 149.4, 137.0, 136.4, 131.5, 129.9, 129.1 (2×C<sub>Ar</sub>), 128.7, 128.0, 127.5 (2×C<sub>Ar</sub>), 127.4, 127.3, 121.9, 57.1 (OCH<sub>3</sub>)<sub>Phe</sub>, 53.0 (-\*CH-)<sub>Phe</sub>. MS (EI): *m/z* (rel. int, %): 320 (4, [M<sup>+</sup>]), 281 (10), 261 (35), 207 (26), 191 (4), 156 (100), 128 (43), 101(14), 77(10), 44 (33).

*Methyl (L)-2-(2-oxo-2-(quinolin-6-yl)acetamido)-2-phenylacetate (3k)*

Yield: 112 mg (32%); pale yellow solid, m.p: 133-136 °C, *R<sub>f</sub>* (85 % CHCl<sub>3</sub>, 15 % EtOAc) 0.40 ; IR (KBr, ν (cm<sup>-1</sup>)): 3393 *m*, 3028*w*, 2958 *w*, 2847 *w*, 1746 *vs*, 1667 *vs*, 1620 *m*, 1522 *m*, 1169 *s*, 812 *w*, 700 *m*. <sup>1</sup>H NMR (500 MHz, CDCl<sub>3</sub>) δ 9.23 (H<sub>Ar</sub>, *d*, *J* = 1.7 Hz, 1H), 9.06 (H<sub>Ar</sub>, *dd*, *J* = 4.2, 1.4 Hz, 1H), 8.47 (H<sub>Ar</sub>, *dd*, *J* = 8.9, 1.9 Hz, 1H), 8.36 (H<sub>Ar</sub>, *d*, *J* = 8.1 Hz, 1H), 8.23 (H<sub>Ar</sub>, *d*, *J* = 8.9 Hz, 1H), 8.17 (NH, *d*, *J* = 7.0 Hz, 1H), 7.54 (*dd*, *J* = 8.3, 4.3 Hz, 1H), 7.49 – 7.38 (*m*, 5H), 5.67 ((- \*CH-)<sub>Phenylglycine</sub>, *d*, *J* = 7.2 Hz, 1H), 3.82 ((OCH<sub>3</sub>)<sub>Phenylglycine</sub>, *s*, 3H). <sup>13</sup>C NMR (126 MHz, CDCl<sub>3</sub>) δ 185.4 (CO), 170.4 (CO), 160.6 (CO), 152.5, 149.5, 139.3, 135.5, 134.8, 131.2, 129.7, 129.6, 129.2 (2×C<sub>Ar</sub>), 129.0 (2×C<sub>Ar</sub>), 127.4 (2×C<sub>Ar</sub>), 122.1, 56.7 (OCH<sub>3</sub>)<sub>Phe</sub>, 53.1 (-\*CH-)<sub>Phe</sub>. MS (EI): *m/z* (rel. int, %): 348 (1, [M<sup>+</sup>]), 289 (13), 281 (32), 253 (14), 207 (82), 191 (11), 156 (87), 128 (44), 44 (100).

*Methyl (quinoline-6-carbonyl)-L-prolinate (2l)*

Yield: 199 mg (70%); light yellowish oil, *R<sub>f</sub>* (80 % CHCl<sub>3</sub>, 20 % EtOAc, 1 % MeOH) 0.20; ((80:20) Mixture of *trans*–*cis* Amide Rotamers); IR (KBr, ν (cm<sup>-1</sup>)): 3447 *w/br*, 2954 *w*, 1743 *s*, 1633 *vs*, 1614 *s*, 1594 *w*, 1465 *m*, 1433 *m*, 1414 *m*, 1175 *m*, 850 *w*. <sup>1</sup>H NMR (500 MHz, CDCl<sub>3</sub>) (*Data for Major Rotamer*) δ 8.90 (H<sub>Ar</sub>, *d*, *J* = 4.0 Hz, 1H), 8.15 (H<sub>Ar</sub>, *d*, *J* = 8.2 Hz, 1H), 8.09 (H<sub>Ar</sub>, *d*, *J* = 8.7 Hz, 1H), 8.02 (H<sub>Ar</sub>, *s*, 1H), 7.85 (H<sub>Ar</sub>, *dd*, *J* = 8.5, 1.5 Hz, 1H), 7.40 (H<sub>Ar</sub>, *dd*, *J* = 8.3, 4.2 Hz, 1H), 4.67 ((- \*CH-)<sub>Pro</sub>, *dd*, *J* = 8.3, 5.1 Hz, 1H), 3.74 ((OCH<sub>3</sub>)<sub>Pro</sub>, *s*, 3H), 3.65 ((-CH<sub>a</sub>-)<sub>Pro</sub>, *m*, 1H), 3.55 – 3.49 ((-CH<sub>b</sub>-)<sub>Pro</sub>, *m*, 1H), 2.26 – 2.33 ((-CH<sub>a'</sub>-)<sub>Pro</sub>, *m*, 1H), 1.95–2.09 ((-CH<sub>2</sub>-)<sub>Pro</sub>, *m*, 2H), 1.88 – 1.85 ((-CH<sub>b'</sub>-)<sub>Pro</sub>, *m*, 1H). <sup>13</sup>C NMR (126 MHz, CDCl<sub>3</sub>) (*Data for Major Rotamer*) δ 172.6 (CO), 168.9 (CO), 151.5, 148.4,

136.8, 134.3, 129.5, 128.0, 127.5, 127.3, 121.8, 59.2 ( $-\text{CH}_2-$ )<sub>Pro</sub>, 52.3 ( $\text{OCH}_3$ )<sub>Pro</sub>, 50.00 ( $-\text{CH}_2-$ )<sub>Pro</sub>, 29.4 ( $-\text{CH}_2-$ )<sub>Pro</sub>, 25.4 ( $-\text{CH}_2-$ )<sub>Pro</sub>.

$^1\text{H}$  NMR (500 MHz,  $\text{CDCl}_3$ ) (Data for Minor Rotamer)  $\delta$  8.90 ( $\text{H}_{Ar}$ , br s, overlapped, 1H), 8.10 ( $\text{H}_{Ar}$ , br s, overlapped, 1H), 8.05 ( $\text{H}_{Ar}$ , br s, overlapped, 1H), 7.80 ( $\text{H}_{Ar}$ , br s, 1H), 7.66 ( $\text{H}_{Ar}$ , d,  $J = 8.5$  Hz, 1H), 7.38 ( $\text{H}_{Ar}$ , br s, overlapped, 1H), 4.34 ( $(-\text{CH}_2-)$ <sub>Pro</sub>, d,  $J = 6.5$  Hz, 1H), 3.77–3.79 ( $(-\text{H}_a\text{CH}_b-)$ <sub>Pro</sub>, m, 2H), 3.44 ( $(\text{OCH}_3)$ <sub>Pro</sub>, s, 3H), 2.18–2.23 ( $(-\text{CH}_a-)$ <sub>Pro</sub>, m, 1H), 1.95 – 2.09 ( $(-\text{CH}_b-)$ <sub>Pro</sub> +  $(-\text{CH}_2-)$ <sub>Pro</sub>, m, overlapped, 3H).  $^{13}\text{C}$  NMR (126 MHz,  $\text{CDCl}_3$ ) (Data for Minor Rotamer)  $\delta$  172.7 (CO), 169.7 (CO), 151.3, 148.1, 136.6, 135.0, 129.8, 128.1, 127.7, 127.4, 126.2, 61.4 ( $-\text{CH}_2-$ )<sub>Pro</sub>, 52.1 ( $-\text{OCH}_3-$ )<sub>Pro</sub>, 46.7 ( $-\text{CH}_2-$ )<sub>Pro</sub>, 31.4 ( $-\text{CH}_2-$ )<sub>Pro</sub>, 22.7 ( $-\text{CH}_2-$ )<sub>Pro</sub>. MS (EI):  $m/z$  (rel. int, %) : 284 (8,  $[\text{M}^+]$ ), 225 (37), 207 (18), 156 (100), 128 (37), 101(14), 44 (25).

*Methyl (2-oxo-2-(quinolin-6-yl)acetyl)-L-prolinate (31)*, ((52:48) Mixture of trans–cis Amide Rotamers).

Yield: 235 mg (75%); brownish oil,  $R_f$  (80 %  $\text{CHCl}_3$ , 20 % EtOAc, 2 % MeOH) 0.40; IR (KBr,  $\nu$  ( $\text{cm}^{-1}$ )): 3447 w/br, 2984 w, 2957 w, 2883 w, 1744 s, 1684 m, 1643 vs, 1621 m, 1447 m, 1360 w, 1323 w, 1170 m, 1118 w, 805 w.

$^1\text{H}$  NMR (500 MHz,  $\text{CDCl}_3$ ) (Data for Major Rotamer)  $\delta$  8.98 ( $\text{H}_{Ar}$ , br s, 1H), 8.63 ( $\text{H}_{Ar}$ , d,  $J = 1.7$  Hz, 1H), 8.30 ( $\text{H}_{Ar}$ , d,  $J = 9.0$  Hz, 1H), 8.26 ( $\text{H}_{Ar}$ , dd,  $J = 4.6, 2.3$  Hz, 1H), 8.15 ( $\text{H}_{Ar}$ , d,  $J = 8.8$  Hz, 1H), 7.46 ( $\text{H}_{Ar}$ , dd,  $J = 8.2, 4.2$  Hz, 1H), 4.67 ( $(-\text{CH}_2-)$ <sub>Pro</sub>, dd,  $J = 8.9, 4.1$  Hz, 1H), 3.81 ( $(\text{OCH}_3)$ <sub>Pro</sub>, s, 3H), 3.55 – 3.62 ( $(-\text{CH}_a-)$ <sub>Pro</sub>, m, 1H), 3.47 – 3.53 ( $(-\text{CH}_b-)$ <sub>Pro</sub>, m, 1H), 2.31 – 2.36 ( $(-\text{CH}_a-)$ <sub>Pro</sub>, m, 1H), 2.13 – 2.21 ( $(-\text{CH}_b-)$ <sub>Pro</sub>, m, 1H), 1.93 – 2.01 ( $(-\text{CH}_2-)$ <sub>Pro</sub>, m, 2H).  $^{13}\text{C}$  NMR (126 MHz,  $\text{CDCl}_3$ ) (Data for Major Rotamer)  $\delta$  190.4 (CO), 171.8 (CO), 165.0 (CO), 153.3, 150.6, 138.2, 133.8, 130.7, 130.5, 127.6, 127.6, 122.2, 58.4 ( $-\text{CH}_2-$ )<sub>Pro</sub>, 52.6 ( $-\text{OCH}_3-$ )<sub>Pro</sub>, 47.3 ( $-\text{CH}_2-$ )<sub>Pro</sub>, 29.1 ( $-\text{CH}_2-$ )<sub>Pro</sub>, 24.7 ( $-\text{CH}_2-$ )<sub>Pro</sub>.

$^1\text{H}$  NMR (500 MHz,  $\text{CDCl}_3$ ) (Data for Minor Rotamer)  $\delta$  8.95 ( $\text{H}_{Ar}$ , br s, 1H), 8.63 ( $\text{H}_{Ar}$ , s, 1H), 8.28 ( $\text{H}_{Ar}$ , d,  $J = 4.3$  Hz, 1H), 8.25 ( $\text{H}_{Ar}$ , dd,  $J = 9.0, 2.0$  Hz, 1H), 8.12 ( $\text{H}_{Ar}$ , d,  $J = 8.9$  Hz, 1H), 7.43 ( $\text{H}_{Ar}$ , d,  $J = 4.3$  Hz, 1H), 4.79 ( $(-\text{CH}_2-)$ <sub>Pro</sub>, dd,  $J = 8.5, 3.8$  Hz, 1H), 3.82 – 3.88 ( $(-\text{CH}_a-)$ <sub>Pro</sub>, m, 1H), 3.67 – 3.74 ( $(-\text{CH}_b-)$ <sub>Pro</sub>, m, 1H), 3.41 ( $(\text{OCH}_3)$ <sub>Pro</sub>, s, 3H), 2.24 – 2.30 ( $(-\text{CH}_a-)$ <sub>Pro</sub>, m, 1H), 2.02 – 2.09 ( $(-\text{CH}_b-)$ <sub>Pro</sub>, m, 1H), 1.82 – 1.92 ( $(-\text{CH}_2-)$ <sub>Pro</sub>, m, 2H).  $^{13}\text{C}$  NMR (126 MHz,  $\text{CDCl}_3$ ) (Data for Minor Rotamer)  $\delta$  189.4 (CO), 172.1 (CO), 164.0 (CO), 152.9, 150.2, 138.1, 133.5, 131.1, 129.8, 128.5, 127.3, 122.0, 59.4 ( $-\text{CH}_2-$ )<sub>Pro</sub>, 52.5 ( $-\text{OCH}_3-$ )<sub>Pro</sub>, 46.8 ( $-\text{CH}_2-$ )<sub>Pro</sub>, 31.0 ( $-\text{CH}_2-$ )<sub>Pro</sub>, 22.5 ( $-\text{CH}_2-$ )<sub>Pro</sub>. MS (EI):  $m/z$  (rel. int, %) : 312 (1,  $[\text{M}^+]$ ), 284 (20), 207 (10), 156 (88), 128 (100), 101(15), 44 (25).

*Methyl (quinoline-6-carbonyl)-(L/D)-serinate (2m)*

Yield: 228 mg (83%); white solid, m.p: 174–177 °C,  $R_f$  (70 %  $\text{CHCl}_3$ , 30 % EtOAc, 2 % MeOH) 0.20; IR (KBr,  $\nu$  ( $\text{cm}^{-1}$ )): 3449 w/br, 3280 m, 3180 w/br, 2954 vw, 1740 s, 1642 vs, 1632 m, 1540 m, 1233 w, 1074 m, 1414 m, 847 w.

$^1\text{H}$  NMR (500 MHz,  $\text{DMSO}-d_6$ )  $\delta$  9.01 ( $\text{H}_{Ar}$ , dd,  $J = 4.2, 1.6$  Hz, 1H), 8.87 ( $\text{H}_{Ar}$ , d,  $J = 7.4$  Hz, 1H), 8.59 (NH, d,  $J$

= 1.7 Hz, 1H), 8.51 (H<sub>Ar</sub>, *d*, *J* = 7.7 Hz, 1H), 8.22 (H<sub>Ar</sub>, *dd*, *J* = 8.8, 1.9 Hz, 1H), 8.11 (H<sub>Ar</sub>, *d*, *J* = 8.8 Hz, 1H), 7.63 (H<sub>Ar</sub>, *dd*, *J* = 8.3, 4.2 Hz, 1H), 5.14 ((-OH)<sub>Ser</sub>, *t*, *J* = 6.1 Hz, 1H), 4.63 ((-CH<sub>2</sub>-)<sub>Ser</sub>, *qd*, *J* = 5.0 Hz, 1H), 3.79-3.93 ((-H<sub>b</sub>CH<sub>a</sub>-)<sub>Ser</sub>, *m*, 2H), 3.69 ((OCH<sub>3</sub>)<sub>Ser</sub>, *s*, 3H). <sup>13</sup>C NMR (126 MHz, DMSO-d<sub>6</sub>) δ 171.5 (CO), 166.6 (CO), 152.7, 149.2, 137.6, 132.0, 129.5, 128.8, 128.3, 127.5, 122.7, 61.5 (-CH<sub>2</sub>-)<sub>Ser</sub>, 56.3 (-CH<sub>2</sub>-OH)<sub>Ser</sub>, 52.4 (OCH<sub>3</sub>)<sub>Ser</sub>. MS (EI): *m/z* (rel. int, %): 274 (1, [M<sup>+</sup>]), 256 (20), 224 (10), 197 (20), 156 (100), 128 (50), 101(16), 51 (5).

*Methyl (2-oxo-2-(quinolin-6-yl)acetyl)-(L/D)-serinate (3m)*

Yield: 91 mg (30%); orange solid, m.p: 144-146 °C, R<sub>f</sub> (70 % CHCl<sub>3</sub>, 30 % EtOAc, 2 % MeOH) 0.40; IR (KBr, ν (cm<sup>-1</sup>)): 3398 *w*, 3199 *w/br*, 2968 *w*, 1744 *s*, 1684 *w*, 1656 *vs*, 1617 *m*, 1516 *m*, 1464 *w*, 1431 *w*, 1325 *m*, 1223 *m*, 1171 *m*, 1084 *m*, 815 *m*. <sup>1</sup>H NMR (500 MHz, CDCl<sub>3</sub>) δ 9.14 (NH, *d*, *J* = 1.6 Hz, 1H), 9.06 (H<sub>Ar</sub>, *dd*, *J* = 4.3, 1.6 Hz, 1H), 8.39 – 8.34 (H<sub>Ar</sub>, *m*, 2H), 8.18 (H<sub>Ar</sub>, *d*, *J* = 8.9 Hz, 1H), 8.10 (H<sub>Ar</sub>, *d*, *J* = 7.7 Hz, 1H), 7.57 (H<sub>Ar</sub>, *dd*, *J* = 8.3, 4.4 Hz, 1H), 4.81 ((-CH<sub>2</sub>-)<sub>Ser</sub>, *dt*, *J* = 7.4, 3.5 Hz, 1H), 4.21 ((-H<sub>b</sub>CH<sub>a</sub>-)<sub>Ser</sub>, *dd*, *J* = 11.5, 3.7 Hz, 1H), 4.12 ((-H<sub>b</sub>CH<sub>a</sub>-)<sub>Ser</sub>, *dd*, *J* = 11.5, 3.4 Hz, 1H), 3.87 ((OCH<sub>3</sub>)<sub>Ser</sub>, *s*, 3H). <sup>13</sup>C NMR (126 MHz, CDCl<sub>3</sub>) δ 185.6 (CO), 170.1 (CO), 161.6, 152.6, 149.5, 139.2, 134.7, 131.1, 129.5, 129.2, 127.4, 122.1, 62.69 (-CH<sub>2</sub>-OH)<sub>Ser</sub>, 54.8 (OCH<sub>3</sub>)<sub>Ser</sub>, 53.0 (-CH<sub>2</sub>-)<sub>Ser</sub>. MS (EI): *m/z* (rel. int, %): 302 (1, [M<sup>+</sup>]), 241 (6), 207 (13), 183 (54), 156 (100), 128 (36), 101(10), 59 (6).

*N-Phenylquinoline-6-carboxamide (2n)*

Yield: 169 mg (68%); pale yellow solid, m.p: 155-156 °C, R<sub>f</sub> (85 % CHCl<sub>3</sub>, 15 % EtOAc, 1 % MeOH) 0.25; IR (KBr, ν (cm<sup>-1</sup>)): 3315 *w/br*, 3180 *w/br*, 1652 *vs*, 1598 *m*, 1529 *m*, 1497 *w*, 1444 *w*, 1330 *w*, 1112 *w*, 889 *m*, 757 *m*. <sup>1</sup>H NMR (500 MHz, CDCl<sub>3</sub>) δ 8.96 (H<sub>Ar</sub>, *d*, *J* = 3.8 Hz, 1H), 8.53 (H<sub>Ar</sub>, *s*, 1H), 8.31 (H<sub>Ar</sub>, *s*, 1H), 8.11 (NH, *s*, 1H), 8.09 (H<sub>Ar</sub>, *s*, 2H), 7.71 (H<sub>Ar</sub>, *d*, *J* = 7.9 Hz, 2H), 7.42 (H<sub>Ar</sub>, *dd*, *J* = 8.2, 4.2 Hz, 1H), 7.37 (H<sub>Ar</sub>, *t*, *J* = 7.7 Hz, 2H), 7.17 (H<sub>Ar</sub>, *t*, *J* = 7.4 Hz, 1H). <sup>13</sup>C NMR (126 MHz, CDCl<sub>3</sub>) δ 165.43(CO), 152.11, 149.30, 137.92, 136.97, 132.91, 130.05, 129.13 (2×C<sub>Ar</sub>), 127.87, 127.51, 127.18, 124.84, 122.00, 120.54 (2×C<sub>Ar</sub>). MS (EI): *m/z* (rel. int, %) : 248 (38, [M<sup>+</sup>]), 156 (100), 128 (52), 101 (20), 77 (10).

*N-Benzylquinoline-6-carboxamide (2o)*

Yield: 34 mg (13%); orange solid, m.p: 124-126 °C, R<sub>f</sub> (85 % CHCl<sub>3</sub>, 15 % EtOAc, 1 % MeOH) 0.20; IR (KBr, ν (cm<sup>-1</sup>)): 3291 *m*, 1638 *vs*, 1558 *s*, 1545 *s*, 1496 *s*, 1416 *m*, 1326 *m*, 1313 *w*, 908 *m*, 858 *m*, 720 *m*. <sup>1</sup>H NMR (500 MHz, CDCl<sub>3</sub>) δ 8.98 (H<sub>Ar</sub>, *dd*, *J* = 4.2, 1.6 Hz, 1H), 8.34 (H<sub>Ar</sub>, *d*, *J* = 1.6 Hz, 1H), 8.21 (H<sub>Ar</sub>, *d*, *J* = 7.8 Hz, 1H), 8.14 (H<sub>Ar</sub>, *d*, *J* = 8.8 Hz, 1H), 8.08 (H<sub>Ar</sub>, *dd*, *J* = 8.8, 1.9 Hz, 1H), 7.46 (*dd*, *J* = 8.3, 4.2 Hz, 1H), 7.39 (H<sub>Ar</sub>, *q*, *J* = 7.9 Hz, 4H), 7.35 – 7.30 (H<sub>Ar</sub>, *m*, 1H), 6.82 (NH, *br s*, 1H), 4.72 ((CH<sub>2</sub>)<sub>Bn</sub>, *d*, *J* = 5.6 Hz, 2H). <sup>13</sup>C NMR (126 MHz, CDCl<sub>3</sub>) δ 173.3 (CO), 166.8, 152.0, 149.4, 138.0, 137.0, 132.3, 130.0, 128.9, 128.9, 128.0 (2×C<sub>Ar</sub>), 128.0 (2×C<sub>Ar</sub>), 127.8,

127.6, 127.1, 122.0, 44.4 ( $\underline{\text{CH}_2}_{\text{Bn}}$ ). MS (EI):  $m/z$  (rel. int, %): 262 (45,  $[\text{M}^+]$ ), 207 (46), 156 (60), 128 (40), 101 (14), 73 (15), 44 (100).

*N*-Benzyl-2-oxo-2-(quinolin-6-yl)acetamide (**3o**)

Yield: 206 mg (71%); pale yellow solid, m.p: 109-111 °C,  $R_f$  (85 %  $\text{CHCl}_3$ , 15 % EtOAc, 1 % MeOH) 0.30; IR (KBr,  $\nu$  ( $\text{cm}^{-1}$ )): 3331 *w*, 3078 *w*, 2953 *w*, 1683 *w*, 1652 *vs*, 1618 *w*, 1535 *w*, 1460 *w*, 1455 *w*, 1241 *w*, 1176 *m*, 843 *m*.  $^1\text{H}$  NMR (500 MHz,  $\text{CDCl}_3$ )  $\delta$  9.28 ( $\text{H}_{\text{Ar}}$ , *d*,  $J$  = 1.6 Hz, 1H), 9.04 ( $\text{H}_{\text{Ar}}$ , *d*,  $J$  = 4.0 Hz, 1H), 8.45 ( $\text{H}_{\text{Ar}}$ , *dd*,  $J$  = 8.9, 1.8 Hz, 1H), 8.36 ( $\text{H}_{\text{Ar}}$ , *d*,  $J$  = 8.2 Hz, 1H), 8.20 ( $\text{H}_{\text{Ar}}$ , *d*,  $J$  = 8.9 Hz, 1H), 7.67 (NH, *br s*, 1H), 7.53 ( $\text{H}_{\text{Ar}}$ , *dd*,  $J$  = 8.3, 4.3 Hz, 1H), 7.42 – 7.36 ( $\text{H}_{\text{Ar}}$ , *m*, 4H), 7.34 ( $\text{H}_{\text{Ar}}$ , *dd*,  $J$  = 11.6, 3.1 Hz, 1H), 7.31 – 7.19 ( $\text{H}_{\text{Ar}}$ , *m*, 1H), 4.63 ( $(\underline{\text{CH}_2})_{\text{Bn}}$ , *d*,  $J$  = 6.1 Hz, 2H).  $^{13}\text{C}$  NMR (126 MHz,  $\text{CDCl}_3$ )  $\delta$  186.4 (CO), 161.4 (CO), 152.9, 150.1, 138.7, 137.0, 134.9, 131.2, 129.7, 129.4, 128.9, 128.6, 127.9, 127.4, 127.2, 122.1, 43.6 ( $\underline{\text{CH}_2})_{\text{Bn}}$ . MS (EI):  $m/z$  (rel. int, %): 290 (2,  $[\text{M}^+]$ ), 207 (10), 156 (100), 128 (47), 101 (15), 91 (36), 44 (17).

*N*-(Pyridin-2-ylmethyl)quinoline-6-carboxamide (**2p**)

Yield: 95 mg (36%); brownish waxy solid,  $R_f$  (80 %  $\text{CHCl}_3$ , 20 % EtOAc, 2 % MeOH) 0.20; IR (KBr,  $\nu$  ( $\text{cm}^{-1}$ )): 3471 *m/br*, 1660 *vs*, 1654 *vs*, 1595 *m*, 1539 *s*, 1533 *m*, 1495 *m*, 1306 *m*, 850 *w*, 785 *m*, 668 *s*.  $^1\text{H}$  NMR (500 MHz,  $\text{CDCl}_3$ )  $\delta$  8.96 ( $\text{H}_{\text{Ar}}$ , *dd*,  $J$  = 4.2, 1.6 Hz, 1H), 8.57 ( $\text{H}_{\text{Ar}}$ , *d*,  $J$  = 4.8 Hz, 1H), 8.41 ( $\text{H}_{\text{Ar}}$ , *d*,  $J$  = 1.4 Hz, 1H), 8.23 ( $\text{H}_{\text{Ar}}$ , *dd*,  $J$  = 8.3, 1.2 Hz, 1H), 8.18 – 8.12 ( $\text{H}_{\text{Ar}}$ , *m*, 2H), 8.07 (NH, *br s*, 1H), 7.70 ( $\text{H}_{\text{Ar}}$ , *td*,  $J$  = 7.7, 1.7 Hz, 1H), 7.45 ( $\text{H}_{\text{Ar}}$ , *dd*,  $J$  = 8.3, 4.2 Hz, 1H), 7.37 ( $\text{H}_{\text{Ar}}$ , *d*,  $J$  = 7.8 Hz, 1H), 7.27 – 7.19 ( $\text{H}_{\text{Ar}}$ , *m*, 1H), 4.82 ( $(\underline{\text{CH}_2})_{\text{Pico}}$ , *d*,  $J$  = 4.9 Hz, 2H).  $^{13}\text{C}$  NMR (126 MHz,  $\text{CDCl}_3$ )  $\delta$  166.7 (CO), 156.1, 151.9, 149.3, 149.0, 137.1, 137.0, 132.2, 129.9, 127.9, 127.6, 127.3, 122.6, 122.4, 121.9, 44.9 ( $\underline{\text{CH}_2})_{\text{Pico}}$ . MS (EI):  $m/z$  (rel. int, %): 263 (16,  $[\text{M}^+]$ ), 207 (30), 156 (19), 128 (36), 107 (100), 109 (14), 44 (37), 40 (35).

2-Oxo-*N*-(pyridin-2-ylmethyl)-2-(quinolin-6-yl)acetamide (**3p**)

Yield: 114 mg (39%); green solid, m.p: 129-131 °C,  $R_f$  (80 %  $\text{CHCl}_3$ , 20 % EtOAc, 2 % MeOH) 0.30; IR (KBr,  $\nu$  ( $\text{cm}^{-1}$ )): 3180 *w*, 3095 *w*, 2943 *w*, 1679 *m*, 1659 *vs*, 1616 *m*, 1572 *m*, 1509 *w*, 1437 *w*, 1234 *w*, 1171 *m*, 922 *w*, 783 *m*.  $^1\text{H}$  NMR (500 MHz,  $\text{CDCl}_3$ )  $\delta$  9.19 (NH, *d*,  $J$  = 1.7 Hz, 1H), 9.02 ( $\text{H}_{\text{Ar}}$ , *dd*,  $J$  = 4.2, 1.6 Hz, 1H), 8.59 ( $\text{H}_{\text{Ar}}$ , *d*,  $J$  = 4.8 Hz, 1H), 8.43 ( $\text{H}_{\text{Ar}}$ , *dd*,  $J$  = 8.9, 1.8 Hz, 2H), 8.31 ( $\text{H}_{\text{Ar}}$ , *d*,  $J$  = 8.2 Hz, 1H), 8.15 ( $\text{H}_{\text{Ar}}$ , *d*,  $J$  = 8.9 Hz, 1H), 7.71 ( $\text{H}_{\text{Ar}}$ , *td*,  $J$  = 7.7, 1.7 Hz, 1H), 7.49 ( $\text{H}_{\text{Ar}}$ , *dd*,  $J$  = 8.3, 4.3 Hz, 1H), 7.35 ( $\text{H}_{\text{Ar}}$ , *d*,  $J$  = 7.8 Hz, 1H), 7.25 ( $\text{H}_{\text{Ar}}$ , *dd*,  $J$  = 7.2, 5.2 Hz, 1H), 4.75 ( $(\underline{\text{CH}_2})_{\text{Pico}}$ , *d*,  $J$  = 5.4 Hz, 2H).  $^{13}\text{C}$  NMR (126 MHz,  $\text{CDCl}_3$ )  $\delta$  186.5 (CO), 161.9 (CO), 155.4, 153.2, 150.4, 149.2, 138.3, 137.1, 134.7, 131.1, 129.9, 129.2, 127.3, 122.8, 122.1, 122.0, 44.3 ( $\underline{\text{CH}_2})_{\text{Pico}}$ . MS (EI):  $m/z$  (rel. int, %): 291 (1,  $[\text{M}^+]$ ), 248 (26), 207 (32), 156 (43), 135 (100), 128 (43), 101 (18), 92 (94), 65 (20), 44 (32), 40 (28).

*N*-(Pyridin-3-ylmethyl)-quinoline-6-carboxamide (**2q**)

Yield: 159 mg (60%); pale yellow waxy solid,  $R_f$  (80 % CHCl<sub>3</sub>, 20 % EtOAc, 1 % MeOH) 0.20; IR (KBr,  $\nu$  (cm<sup>-1</sup>)): 3243 *w/br*, 3060 *w*, 2925 *w*, 1647 *vs*, 1622 *w*, 1558 *m*, 1430 *w*, 1309 *m*, 824 *w*. <sup>1</sup>H NMR (500 MHz, CDCl<sub>3</sub>)  $\delta$  8.92 (H<sub>Ar</sub>, *dd*,  $J$  = 4.2, 1.6 Hz, 1H), 8.56 (H<sub>Ar</sub>, *s*, 1H), 8.46 (H<sub>Ar</sub>, *d*,  $J$  = 4.4 Hz, 1H), 8.35 (H<sub>Ar</sub>, *d*,  $J$  = 1.6 Hz, 1H), 8.14 – 8.03 (H<sub>Ar</sub>, *m*, 3H), 7.82 (NH, *br s*, 1H), 7.75 (H<sub>Ar</sub>, *d*,  $J$  = 7.9 Hz, 1H), 7.40 (H<sub>Ar</sub>, *dd*,  $J$  = 8.3, 4.2 Hz, 1H), 7.25 (H<sub>Ar</sub>, *dd*,  $J$  = 7.8, 4.9 Hz, 1H), 4.67 ((CH<sub>2</sub>)<sub>Pico</sub>, *d*,  $J$  = 5.8 Hz, 1H). <sup>13</sup>C NMR (126 MHz, CDCl<sub>3</sub>)  $\delta$  167.1 (CO), 152.0, 149.3, 148.8, 148.4, 137.1, 136.4, 134.4, 131.9, 129.9, 128.0, 127.5, 127.3, 123.9, 122.0, 41.6 ((CH<sub>2</sub>)<sub>Pico</sub>). MS (EI):  $m/z$  (rel. int, %): 263 (77, [M<sup>+</sup>]), 246 (15), 207 (81), 191(10), 156 (100), 128 (83), 101 (28), 73 (25), 44 (75), 40 (73).

2-Oxo-*N*-(pyridin-3-ylmethyl)-2-(quinolin-6-yl)acetamide (**3q**)

Yield: 178 mg (61%); pale yellow solid, m.p: 132-135 °C,  $R_f$  (80 % CHCl<sub>3</sub>, 20 % EtOAc, 5 % MeOH) 0.30; IR (KBr,  $\nu$  (cm<sup>-1</sup>)): 3218 *w*, 1656 *m*, 1654 *vs*, 1619 *w*, 1576 *w*, 1526 *w*, 1426 *w*, 1256 *w*, 1171 *m*, 914 *w*, 813 *w*, 707 *m*. <sup>1</sup>H NMR (500 MHz, CDCl<sub>3</sub>)  $\delta$  9.21 (H<sub>Ar</sub>, *d*,  $J$  = 1.7 Hz, 1H), 9.03 (H<sub>Ar</sub>, *dd*,  $J$  = 4.2, 1.7 Hz, 1H), 8.67 (H<sub>Ar</sub>, *d*,  $J$  = 1.7 Hz, 1H), 8.57 (H<sub>Ar</sub>, *dd*,  $J$  = 4.8, 1.3 Hz, 1H), 8.41 (H<sub>Ar</sub>, *dd*,  $J$  = 8.9, 1.9 Hz, 1H), 8.32 (H<sub>Ar</sub>, *d*,  $J$  = 8.3 Hz, 1H), 8.15 (H<sub>Ar</sub>, *d*,  $J$  = 8.9 Hz, 1H), 7.98 (NH, *s*, 1H), 7.76 (H<sub>Ar</sub>, *d*,  $J$  = 7.9 Hz, 1H), 7.50 (H<sub>Ar</sub>, *dd*,  $J$  = 8.3, 4.3 Hz, 1H), 7.34 (H<sub>Ar</sub>, *dd*,  $J$  = 7.8, 4.9 Hz, 1H), 4.66 ((CH<sub>2</sub>)<sub>Pico</sub>, *d*,  $J$  = 6.2 Hz, 2H). <sup>13</sup>C NMR (126 MHz, CDCl<sub>3</sub>)  $\delta$  186.2 (CO), 161.7 (CO), 153.4, 150.6, 148.9, 148.8, 138.2, 136.2, 134.9, 133.2, 130.9, 130.1, 129.0, 127.3, 123.9, 122.1, 41.0 ((CH<sub>2</sub>)<sub>Pico</sub>). MS (EI):  $m/z$  (rel. int, %): 291 (1, [M<sup>+</sup>]), 248 (26), 207 (10), 191(1), 156 (100), 128 (51), 101 (17), 65 (9), 44 (8), 40 (8).

*N*-(Pyridin-4-ylmethyl)quinoline-6-carboxamide (**2r**)

Yield: 171 mg (65%); yellow solid, m.p: 140-141 °C,  $R_f$  (80 % CHCl<sub>3</sub>, 20 % EtOAc, 5 % MeOH) 0.30; IR (KBr,  $\nu$  (cm<sup>-1</sup>)): 3296 *m*, 1637 *s*, 1617 *w*, 1596 *m*, 1543 *s*, 1309 *m*, 856 *w*, 791 *w*. <sup>1</sup>H NMR (500 MHz, CDCl<sub>3</sub>)  $\delta$  8.97 (H<sub>Ar</sub>, *dd*,  $J$  = 4.2, 1.6 Hz, 1H), 8.51 (H<sub>Ar</sub>, *d*,  $J$  = 6.0 Hz, 2H), 8.41 (H<sub>Ar</sub>, *s*, 1H), 8.19 (H<sub>Ar</sub>, *dd*,  $J$  = 8.3, 1.2 Hz, 1H), 8.16 – 8.10 (H<sub>Ar</sub>, *m*, 2H), 7.68 (NH, *br s*, 1H), 7.46 (H<sub>Ar</sub>, *dd*,  $J$  = 8.3, 4.2 Hz, 1H), 7.31 (H<sub>Ar</sub>, *d*,  $J$  = 5.8 Hz, 2H), 4.71 ((CH<sub>2</sub>)<sub>Pico</sub>, *d*,  $J$  = 5.9 Hz, 2H). <sup>13</sup>C NMR (126 MHz, CDCl<sub>3</sub>)  $\delta$  167.2 (CO), 152.1, 149.3, 149.2 (2×C<sub>AA'</sub>BB'), 148.5, 137.1, 131.7, 130.0, 128.1, 127.6, 127.2, 122.7 (2×C<sub>AA'</sub>BB'), 122.1, 43.0 ((CH<sub>2</sub>)<sub>Pico</sub>). MS (EI):  $m/z$  (rel. int, %): 263 (45, [M<sup>+</sup>]), 207 (83), 156 (67), 128 (46), 101 (16), 73 (28), 44 (100), 40 (50).

2-Oxo-*N*-(pyridin-4-ylmethyl)-2-(quinolin-6-yl)acetamide (**3r**)

Yield: 154 mg (53%); pale yellow solid, m.p: 120-122 °C,  $R_f$  (85 % CHCl<sub>3</sub>, 15 % EtOAc, 1 % MeOH) 0.40; IR (KBr,  $\nu$  (cm<sup>-1</sup>)): 3309 *m*, 3031 *w*, 1680 *s*, 1652 *vs*, 1621 *m*, 1521 *m*, 1518 *m*, 1457 *w*, 1252 *w*, 1168 *m*, 1118 *w*, 809

*m*, 785 *w*.  $^1\text{H}$  NMR (500 MHz,  $\text{CDCl}_3$ )  $\delta$  9.07 (NH, *s*, 1H), 8.94 ( $\text{H}_{\text{Ar}}$ , *d*,  $J = 3.8$  Hz, 1H), 8.47 ( $\text{H}_{\text{Ar}}$ , *dd*,  $J = 10.9, 5.2$  Hz, 3H), 8.32 ( $\text{H}_{\text{Ar}}$ , *d*,  $J = 8.9$  Hz, 1H), 8.21 ( $\text{H}_{\text{Ar}}$ , *d*,  $J = 8.3$  Hz, 1H), 8.07 ( $\text{H}_{\text{Ar}}$ , *d*,  $J = 8.9$  Hz, 1H), 7.41 ( $\text{H}_{\text{Ar}}$ , *dd*,  $J = 8.2, 4.2$  Hz, 1H), 7.20 ( $\text{H}_{\text{Ar}}$ , *d*,  $J = 4.9$  Hz, 2H), 4.57 ( $(\text{CH}_2)_{\text{Pico}}$ , *d*,  $J = 6.3$  Hz, 2H).  $^{13}\text{C}$  NMR (126 MHz,  $\text{CDCl}_3$ )  $\delta$  186.5 (CO), 162.3 (CO), 153.4, 150.5, 150.0 ( $2\times\text{C}_{\text{AA'BB'}}$ ), 146.4, 138.1, 134.7, 130.8, 130.0, 128.8, 127.3, 122.3, 122.1 ( $2\times\text{C}_{\text{AA'BB'}}$ ), 42.2 ( $(\text{CH}_2)_{\text{Pico}}$ ). MS (EI):  $m/z$  (rel. int, %): 291 (1,  $[\text{M}^+]$ ), 248 (32), 207 (12), 156 (100), 128 (51), 44 (12).

*N*-Ethyl-*N*-(pyridin-4-ylmethyl)quinoline-6-carboxamide (**2s**)

Yield: 169 mg (58%); brownish oil,  $R_f$  (80 %  $\text{CHCl}_3$ , 20 % EtOAc, 2 % MeOH) 0.3; IR (KBr,  $\nu$  ( $\text{cm}^{-1}$ )): 3426 *m/br*, 2996 *w*, 1635 *vs*, 1602 *w*, 1476 *m*, 1415 *m*, 1283 *m*, 844 *w*, 790 *w*.  $^1\text{H}$  NMR (500 MHz,  $\text{CDCl}_3$ )  $\delta$  8.94 ( $\text{H}_{\text{Ar}}$ , *br s*, 1H), 8.59 ( $\text{H}_{\text{Ar}}$ , *d*,  $J = 4.5$  Hz, 2H), 8.13 ( $\text{H}_{\text{Ar}}$ , *br s*, 1H), 7.89 ( $\text{H}_{\text{Ar}}$ , *br s*, 1H), 7.75 ( $\text{H}_{\text{Ar}}$ , *br s*, 1H), 7.44 ( $\text{H}_{\text{Ar}}$ , *br s*, 1H), 7.31 ( $\text{H}_{\text{Ar}}$ , *br s*, 1H), 7.13 ( $\text{H}_{\text{Ar}}$ , *br s*, 1H), 4.66 ( $(\text{CH}_2)_{\text{Pico}}$ , *br*, 2H), 3.37 ( $(\text{CH}_2\text{-CH}_3)_{\text{Pico}}$ , *br*, 2H), 1.18 ( $(\text{CH}_2\text{-CH}_3)_{\text{Pico}}$ , *br*, 3H).  $^{13}\text{C}$  NMR (126 MHz,  $\text{CDCl}_3$ )  $\delta$  171.4 (CO), 151.5, 150.0 (*br*), 149.8 (*br*), 148.2, 146.9 (*br*), 136.5, 134.2, 130.1, 127.8, 127.3, 126.2, 122.7 (*br*), 122.0, 121.6 (*br*), 46.9 ( $(\text{-CH}_2\text{-})_{\text{Pico}}$ ), 44.0 ( $(\text{CH}_2\text{-CH}_3)_{\text{Pico}}$ ), 14.0 ( $(\text{CH}_2\text{-CH}_3)_{\text{Pico}}$ ). MS (EI):  $m/z$  (rel. int, %): 291 (40,  $[\text{M}^+]$ ), 207 (12), 199 (5), 156 (100), 128 (55), 101 (18), 92 (34), 65 (8).

*N*-Ethyl-2-oxo-*N*-(pyridin-4-ylmethyl)-2-(quinolin-6-yl)acetamide (**3s**) ((57:43) Mixture of *trans*-*cis* Amide Rotamers).

Yield: 86 mg (27%); marron oil,  $R_f$  (80 %  $\text{CHCl}_3$ , 20 % EtOAc, 2 % MeOH) 0.2; IR (KBr,  $\nu$  ( $\text{cm}^{-1}$ )): 3436 *w*, 3050 *w*, 2974 *w*, 2930*w*, 1686 *w*, 1678 *m*, 1643 *vs*, 14016 *m*, 1169 *m*, 1115 *m*, 786 *w*.  $^1\text{H}$  NMR (500 MHz,  $\text{CDCl}_3$ ) (*Data for Major Rotamer*)  $\delta$  9.08 ( $\text{H}_{\text{Ar}}$ , *dd*,  $J = 4.0, 1.7$  Hz, 1H), 8.68 ( $\text{H}_{\text{Ar}}$ , *d*,  $J = 6.5$  Hz,  $2\times\text{H}_{\text{AA'BB'}}$ ), 8.63 – 8.56 ( $\text{H}_{\text{Ar}}$ , *m*, 1H), 8.51 ( $\text{H}_{\text{Ar}}$ , *d*,  $J = 1.7$  Hz, 1H), 8.35 – 8.20 ( $\text{H}_{\text{Ar}}$ , *m*, 2H), 7.55 ( $\text{H}_{\text{Ar}}$ , *t*,  $J = 8.1\text{Hz}$ , 1H), 7.38 ( $\text{H}_{\text{Ar}}$ , *d*,  $J = 6.0$  Hz,  $2\times\text{H}_{\text{AA'BB'}}$ ), 4.82 ( $(\text{CH}_2)_{\text{Pico}}$ , *s*, 2H), 3.34 ( $(\text{CH}_2\text{-CH}_3)_{\text{Pico}}$ , *qd*,  $J = 7.1$  Hz, 2H), 1.19 ( $(\text{CH}_2\text{-CH}_3)_{\text{Pico}}$ , *t*,  $J = 7$  Hz, 3H).  $^{13}\text{C}$  NMR (126 MHz,  $\text{CDCl}_3$ )  $\delta$  190.2 (CO), 167.3 (CO), 153.6, 150.8, 149.8, 149.5 ( $2\times\text{C}_{\text{AA'BB'}}$ ), 146.6, 137.9, 132.6, 130.91, 127.6, 122.9 ( $2\times\text{C}_{\text{AA'BB'}}$ ), 122.6, 122.4, 46.5 ( $(\text{-CH}_2\text{-})$ ), 43.0 ( $(\text{CH}_2\text{-CH}_3)_{\text{Pico}}$ ), 14.0 ( $(\text{CH}_2\text{-CH}_3)_{\text{Pico}}$ ).  $^1\text{H}$  NMR (500 MHz,  $\text{CDCl}_3$ ) (*Data for Minor Rotamer*)  $\delta$  9.08 ( $\text{H}_{\text{Ar}}$ , *dd*,  $J = 4.0, 1.7$  Hz, 1H), 8.68 ( $\text{H}_{\text{Ar}}$ , *d*,  $J = 6.5$  Hz,  $2\times\text{H}_{\text{AA'BB'}}$ ), 8.63 – 8.56 ( $\text{H}_{\text{Ar}}$ , *m*, 1H), 8.48 ( $\text{H}_{\text{Ar}}$ , *d*,  $J = 1.7$  Hz, 1H), 8.35 – 8.20 ( $\text{H}_{\text{Ar}}$ , *m*, 2H), 7.55 ( $\text{H}_{\text{Ar}}$ , *t*,  $J = 8.1\text{Hz}$ , 1H), 7.29 ( $\text{H}_{\text{Ar}}$ , *d*,  $J = 6.0$  Hz,  $2\times\text{H}_{\text{AA'BB'}}$  (+ *s*, 1H,  $\text{CHCl}_3$ )), 4.49 ( $(\text{CH}_2)_{\text{Pico}}$ , *s*, 1H), 3.59 ( $(\text{CH}_2\text{-CH}_3)_{\text{Pico}}$ , *qd*,  $J = 7.2$  Hz, 2H), 1.31 ( $(\text{CH}_2\text{-CH}_3)_{\text{Pico}}$ , *t*,  $J = 7$  Hz, 3H).  $^{13}\text{C}$  NMR (126 MHz,  $\text{CDCl}_3$ )  $\delta$  190.3 (CO), 166.7 (CO), 153.5, 150.7 ( $2\times\text{C}_{\text{AA'BB'}}$ ), 147.2, 145.2, 137.8, 132.7, 130.92, 130.8, 127.7, 123.3, 122.38 ( $2\times\text{C}_{\text{AA'BB'}}$ ), 121.4, 50.0 ( $(\text{-CH}_2\text{-})_{\text{Pico}}$ ), 39.9 ( $(\text{CH}_2\text{-CH}_3)_{\text{Pico}}$ ), 12.4 ( $(\text{CH}_2\text{-CH}_3)_{\text{Pico}}$ ). MS (EI):  $m/z$  (rel. int, %): 319 (1,  $[\text{M}^+]$ ), 281(8), 248 (36), 207 (21), 191(3), 156 (100), 128 (38), 101 (14), 92 (60), 65 (11), 44 (18).



*N*-(Furan-2-ylmethyl)quinoline-6-carboxamide (**2t**)

Yield: 156 mg (62%); orange solid, m.p: 164-166 °C, *R*<sub>f</sub> (80 % CHCl<sub>3</sub>, 20 % EtOAc, 1 % MeOH) 0.20; IR (KBr,  $\nu$  (cm<sup>-1</sup>)): 3228 *m*, 1633 *vs*, 1619 *m*, 1539 *s*, 1493 *m*, 1323 *w*, 1307 *m*, 1198 *w*, 910 *w*, 850 *w*, 726 *m*. <sup>1</sup>H NMR (500 MHz, CDCl<sub>3</sub>)  $\delta$  8.96 (H<sub>Ar</sub>, *dd*, *J* = 4.2, 1.6 Hz, 1H), 8.34 (H<sub>Ar</sub>, *d*, *J* = 1.6 Hz, 1H), 8.23 (H<sub>Ar</sub>, *d*, *J* = 8.2 Hz, 1H), 8.15 (H<sub>Ar</sub>, *d*, *J* = 8.8 Hz, 1H), 8.09 (H<sub>Ar</sub>, *dd*, *J* = 8.8, 1.9 Hz, 1H), 7.47 (H<sub>Ar</sub>, *dd*, *J* = 8.3, 4.3 Hz, 1H), 7.39 ((-C=H<sub>a</sub>)<sub>Furfuryl</sub>, *J* = 2 Hz *d*, 1H), 7.00 (NH, *br s*, 1H), 6.36 ((-C=H<sub>b</sub>)<sub>Furfuryl</sub>, *t*, *J* = 5 Hz, 1H), 6.34 ((-C=H<sub>c</sub>)<sub>Furfuryl</sub>, *d*, *J* = 7 Hz, 1H), 4.71 ((CH<sub>2</sub>)<sub>Furfuryl</sub>, *d*, *J* = 5.4 Hz, 2H). <sup>13</sup>C NMR (126 MHz, CDCl<sub>3</sub>)  $\delta$  166.5 (CO), 151.5, 151.0, 148.7, 142.4, 137.6, 132.3, 129.5, 127.9, 127.6, 127.5, 121.9, 110.6, 107.9, 37.2 (CH<sub>2</sub>)<sub>Furfuryl</sub>. MS (EI): *m/z* (rel. int, %): 252 (50, [M<sup>+</sup>]), 207 (23), 156 (100), 128 (58), 101 (17), 44 (50), 40 (69), 53 (12).

*N*-(Furan-2-ylmethyl)-2-oxo-2-(quinolin-6-yl)acetamide (**3t**)

Yield: 247 mg (88%); orange solid, m.p: 109-111 °C, *R*<sub>f</sub> (85 % CHCl<sub>3</sub>, 15 % EtOAc, 2 % MeOH) 0.50; IR (KBr,  $\nu$  (cm<sup>-1</sup>)): 3256 *w*, 1661 *vs*, 1618 *m*, 1517 *w*, 1425 *w*, 1277 *w*, 1168 *m*, 1144 *w*, 814 *m*, 744 *w*. <sup>1</sup>H NMR (500 MHz, CDCl<sub>3</sub>)  $\delta$  9.28 (H<sub>Ar</sub>, *d*, *J* = 1.7 Hz, 1H), 9.05 (H<sub>Ar</sub>, *dd*, *J* = 4.3, 1.6 Hz, 1H), 8.46 (H<sub>Ar</sub>, *dd*, *J* = 8.9, 1.8 Hz, 1H), 8.38 (H<sub>Ar</sub>, *d*, *J* = 8.0 Hz, 1H), 8.22 (H<sub>Ar</sub>, *d*, *J* = 8.9 Hz, 1H), 7.61 (NH, *br s*, 1H), 7.55 (H<sub>Ar</sub>, *dd*, *J* = 8.3, 4.3 Hz, 1H), 7.43 – 7.41 ((-C=H<sub>a</sub>)<sub>Furfuryl</sub>, *dd*, *J* = 1.5, 0.5 Hz, 1H), 6.38 ((-C=H<sub>b</sub>)<sub>Furfuryl</sub>, *t*, *J* = 5 Hz, 1H), 6.36 ((-C=H<sub>c</sub>)<sub>Furfuryl</sub>, *d*, *J* = 3 Hz, 1H), 4.63 ((CH<sub>2</sub>)<sub>Furfuryl</sub>, *d*, *J* = 5.9 Hz, 2H). <sup>13</sup>C NMR (126 MHz, CDCl<sub>3</sub>)  $\delta$  186.1 (CO), 161.1 (CO), 152.8, 150.0, 142.7, 141.9, 138.9, 134.9, 131.2, 129.5, 129.5, 127.4, 122.1, 110.6, 108.2, 36.5 (CH<sub>2</sub>)<sub>Furfuryl</sub>. MS (EI): *m/z* (rel. int, %): 280 (2, [M<sup>+</sup>]), 207 (3), 156 (100), 128 (60), 101 (19), 96 (56), 81 (35), 53 (12).

*N*-(Thiophen-2-ylmethyl)quinoline-6-carboxamide (**2u**)

Yield: 193 mg (72%); yellow brownish crystals, m.p: 143-145 °C, *R*<sub>f</sub> (80 % CHCl<sub>3</sub>, 20 % EtOAc, 1 % MeOH) 0.30; IR (KBr,  $\nu$  (cm<sup>-1</sup>)): 3331 *m/br*, 1640 *vs*, 1540 *vs*, 1526 *s*, 1495 *s*, 1419 *m*, 1301 *m*, 858 *m*, 789 *w*, 700 *s*. <sup>1</sup>H NMR (500 MHz, CDCl<sub>3</sub>)  $\delta$  8.96 – 8.92 (H<sub>Ar</sub>, *dd*, *J* = 4.5, 1.5 Hz, 1H), 8.33 (H<sub>Ar</sub>, *d*, *J* = 1.6 Hz, 1H), 8.20 (H<sub>Ar</sub>, *d*, *J* = 8.2 Hz, 1H), 8.13 (H<sub>Ar</sub>, *d*, *J* = 8.8 Hz, 1H), 8.07 (H<sub>Ar</sub>, *dd*, *J* = 8.8, 1.9 Hz, 1H), 7.46 (H<sub>Ar</sub>, *dd*, *J* = 8.3, 4.3 Hz, 1H), 7.26 ((-C=H<sub>a</sub>)<sub>Thiophene</sub>, *dd*, *J* = 5.1, 0.9 Hz, 1H), 7.08 ((-C=H<sub>b</sub>)<sub>Thiophene</sub>, *s*, *overlapping*, 1H), 7.08 (NH, *s*, *overlapping*, 1H), 6.98 ((-C=H<sub>c</sub>)<sub>Thiophene</sub>, *dd*, *J* = 5.0, 3.5 Hz, 1H), 4.88 ((CH<sub>2</sub>)<sub>Thiophene</sub>, *d*, *J* = 5.5 Hz, 2H). <sup>13</sup>C NMR (126 MHz, CDCl<sub>3</sub>)  $\delta$  166.5 (CO), 151.7, 148.9, 140.6, 137.4, 132.3, 129.6, 127.9, 127.6, 127.4, 127.0, 126.4, 125.5, 121.9, 39.0 (CH<sub>2</sub>)<sub>Thiophene</sub>. MS (EI): *m/z* (rel. int, %): 268 (61, [M<sup>+</sup>]), 207 (28), 191(4), 156 (100), 128 (55), 101 (19), 40 (37).

**2-Oxo-2-(quinolin-6-yl)-N-(thiophen-2-ylmethyl)acetamide (3u)**

Yield: 275 mg (93%); pale yellow waxy solid,  $R_f$  (90 % CHCl<sub>3</sub>, 10 % EtOAc, 1 % MeOH) 0.30; IR (KBr,  $\nu$  (cm<sup>-1</sup>)): 3353 *w*, 2943 *w*, 1684 *w*, 1659 *s*, 1653 *vs*, 1616 *s*, 1558 *m*, 1506 *s*, 1425 *w*, 1175 *m*, 1145 *w*. <sup>1</sup>H NMR (500 MHz, CDCl<sub>3</sub>)  $\delta$  9.27 (H<sub>Ar</sub>, *d*, *J* = 1.7 Hz, 1H), 9.05 (H<sub>Ar</sub>, *dd*, *J* = 4.3, 1.6 Hz, 1H), 8.44 (H<sub>Ar</sub>, *dd*, *J* = 8.9, 1.9 Hz, 1H), 8.36 (H<sub>Ar</sub>, *d*, *J* = 7.8 Hz, 1H), 8.20 (H<sub>Ar</sub>, *d*, *J* = 8.9 Hz, 1H), 7.68 (NH, *br s*, 1H), 7.53 (H<sub>Ar</sub>, *dd*, *J* = 8.3, 4.3 Hz, 1H), 7.29 ((-C=H<sub>a</sub>)<sub>Thiophene</sub>, *dd*, *J* = 5.0, 1.1 Hz, 1H), 7.09 ((-C=H<sub>b</sub>)<sub>Thiophene</sub>, *d*, *J* = 3.1 Hz, 1H), 7.00 ((-C=H<sub>c</sub>)<sub>Thiophene</sub>, *dd*, *J* = 5.1, 3.5 Hz, 1H), 4.80 ((CH<sub>2</sub>)<sub>Thiophene</sub>, *d*, *J* = 6.0 Hz, 2H). <sup>13</sup>C NMR (126 MHz, CDCl<sub>3</sub>)  $\delta$  186.2 (CO), 161.1 (CO), 153.0, 150.1, 139.3, 138.7, 134.9, 131.1, 129.7, 129.3, 127.4, 127.1, 126.7, 125.7, 122.1, 38.2 (CH<sub>2</sub>)<sub>Thiophene</sub>. MS (EI): *m/z* (rel. int, %): 296 (2, [M<sup>+</sup>]), 207 (21), 156 (100), 128 (57), 112 (41), 97 (45), 77 (8), 45 (6).

**(3-Hydroxy-8-azabicyclo[3.2.1]octan-8-yl)(quinolin-6-yl)methanone (2v)**

Yield: 28 mg (10%); brownish light oil,  $R_f$  (70 % CHCl<sub>3</sub>, 30 % EtOAc, 5 % MeOH) 0.20; IR (KBr,  $\nu$  (cm<sup>-1</sup>)): 3420 *m/br*, 2962 *w*, 2937 *w*, 2913 *w*, 1628 *s*, 1606 *vs*, 1470 *m*, 1437 *m*, 1265 *w*, 1088 *s*, 1046 *s*, 803 *s*. <sup>1</sup>H NMR (500 MHz, CDCl<sub>3</sub>)  $\delta$  8.94 (H<sub>Ar</sub>, *d*, *J* = 2.8 Hz, 1H), 8.20 (H<sub>Ar</sub>, *d*, *J* = 8.1 Hz, 1H), 8.13 (H<sub>Ar</sub>, *d*, *J* = 8.6 Hz, 1H), 7.94 (H<sub>Ar</sub>, *s*, 1H), 7.75 (H<sub>Ar</sub>, *dd*, *J* = 8.6, 1.1 Hz, 1H), 7.45 (H<sub>Ar</sub>, *dd*, *J* = 8.2, 4.2 Hz, 1H), 4.80 ((-CH<sub>a</sub>-OH)<sub>Nortropine</sub>, *br s*, 1H), 4.19 ((-CH<sub>b</sub>-)<sub>Nortropine</sub>, *br s*, 1H), 4.05 ((-CH<sub>c</sub>-)<sub>Nortropine</sub>, *br s*, 1H), 3.07 ((OH)<sub>Nortropine</sub>, *br s*, 1H), 2.37 – 2.18 ((-CH<sub>d</sub>-)<sub>Nortropine</sub> + (-CH<sub>2</sub>-)<sub>Nortropine</sub>, *m*, 3H), 2.08 – 1.96 ((-CH<sub>e</sub>-)<sub>Nortropine</sub>, *m*, 1H), 1.99 – 1.83 ((-CH<sub>f</sub>-)<sub>Nortropine</sub> + (-CH<sub>2</sub>-)<sub>Nortropine</sub>, *m*, 3H), 1.76 ((-CH<sub>g</sub>-)<sub>Nortropine</sub>, *d*, *J* = 14.2 Hz, 1H). <sup>13</sup>C NMR (126 MHz, CDCl<sub>3</sub>)  $\delta$  167.0 (CO), 151.4, 148.3, 136.8, 134.6, 129.6, 128.0, 127.8, 126.8, 121.9, 64.6 (-CH<sub>a</sub>-OH)<sub>Nortropine</sub>, 56.2 (-CH<sub>a</sub>(OH)-CH<sub>b,c</sub>-)<sub>Nortropine</sub>, 51.4 (-CH<sub>d,e</sub>-CH<sub>a</sub>(OH)-CH<sub>b,c</sub>-)<sub>Nortropine</sub>, 40.3 (-CH<sub>f</sub>-)<sub>Nortropine</sub>, 38.6 (-CH<sub>g</sub>-)<sub>Nortropine</sub>, 28.6 (-CH<sub>2</sub>-)<sub>Nortropine</sub>, 27.3 (-CH<sub>2</sub>-)<sub>Nortropine</sub>. MS (EI): *m/z* (rel. int, %): 282 (24, [M<sup>+</sup>]), 207 (23), 156 (100), 128 (60), 101 (18), 93 (17), 68 (14), 40 (19).

**(3-Hydroxy-8-azabicyclo[3.2.1]octan-8-yl)-2-(quinolin-6-yl)ethane-1,2-dione (3v)**

Yield: 143 mg (46%); yellow waxy solid,  $R_f$  (70 % CHCl<sub>3</sub>, 30 % EtOAc, 5 % MeOH) 0.30; IR (KBr,  $\nu$  (cm<sup>-1</sup>)): 2941 *w*, 1687 *m*, 1623 *vs*, 1622 *vs*, 1251 *w*, 1173 *w*, 1087 *w*, 1050 *w*, 825 *w*, 780 *w*. <sup>1</sup>H NMR (500 MHz, CDCl<sub>3</sub>)  $\delta$  9.02 (H<sub>Ar</sub>, *dd*, *J* = 4.1, 1.3 Hz, 1H), 8.52 (H<sub>Ar</sub>, *d*, *J* = 1.6 Hz, 1H), 8.31 (H<sub>Ar</sub>, *d*, *J* = 8.1 Hz, 1H), 8.26 (H<sub>Ar</sub>, *dd*, *J* = 8.8, 1.8 Hz, 1H), 8.20 (H<sub>Ar</sub>, *d*, *J* = 8.8 Hz, 1H), 7.51 (H<sub>Ar</sub>, *dd*, *J* = 8.3, 4.3 Hz, 1H), 4.85 – 4.80 ((-CH<sub>a</sub>-OH)<sub>Nortropine</sub>, *m*, 1H), 4.21 ((-CH<sub>b</sub>-)<sub>Nortropine</sub>, *t*, *J* = 4.5 Hz, 1H), 4.02 – 3.97 ((-CH<sub>c</sub>-)<sub>Nortropine</sub>, *m*, 1H), 2.73 ((OH)<sub>Nortropine</sub>, *br s*, 1H), 2.44 – 2.34 ((-CH<sub>f</sub>-)<sub>Nortropine</sub>, *m*, 1H), 2.32 – 2.17 ((-CH<sub>d</sub>-)<sub>Nortropine</sub> + (-CH<sub>2</sub>-)<sub>Nortropine</sub>, *m*, 3H), 2.04 – 1.87 ((-CH<sub>e</sub>-)<sub>Nortropine</sub> + (-CH<sub>2</sub>-)<sub>Nortropine</sub>, *m*, 3H), 1.82 ((-CH<sub>g</sub>-)<sub>Nortropine</sub>, *d*, *J* = 14.3 Hz, 1H). <sup>13</sup>C NMR (126 MHz, CDCl<sub>3</sub>)  $\delta$  190.5 (CO), 161.2 (CO), 153.1, 150.4, 138.2, 132.7, 131.1, 130.3, 127.9, 127.6, 122.3, 64.6 (-CH<sub>a</sub>-OH)<sub>Nortropine</sub>, 54.8 (-CH<sub>a</sub>(OH)-CH<sub>b,c</sub>-)<sub>Nortropine</sub>, 51.2 (-CH<sub>d,e</sub>-CH<sub>a</sub>(OH)-CH<sub>b,c</sub>-)<sub>Nortropine</sub>, 40.4 (-CH<sub>f</sub>-)<sub>Nortropine</sub>, 39.1 (-CH<sub>g</sub>-)<sub>Nortropine</sub>, 28.6 (-CH<sub>2</sub>-)<sub>Nortropine</sub>, 27.1 (-

CH<sub>2</sub>-)*Nortropine*. MS (EI): *m/z* (rel. int, %): 310 (2, [M<sup>+</sup>]), 207 (19), 156 (65), 128 (49), 101 (18), 93 (100), 67 (35), 41 (17).

*N*-(*Prop-2-yn-1-yl*)quinoline-6-carboxamide (**2w**)

Yield: 189 mg (90%); pale yellow solid, m.p: 194-195 °C, R<sub>f</sub> (90 % CHCl<sub>3</sub>, 10 % EtOAc , 1 % MeOH) 0.30; IR (KBr,  $\nu$  (cm<sup>-1</sup>)): 3300 *w/br*, 3196 *w*, 1646 *vs*, 1497 *m*, 1415 *w*, 1311 *w*, 898 *w*, 843 *w*, 785 *w*, 668 *s*. <sup>1</sup>H NMR (500 MHz, DMSO-d<sub>6</sub>)  $\delta$  9.21 (NH, *t*, *J* = 5.4 Hz, 1H), 9.00 (H<sub>Ar</sub>, *dd*, *J* = 4.2, 1.7 Hz, 1H), 8.54 (H<sub>Ar</sub>, *d*, *J* = 1.8 Hz, 1H), 8.49 (H<sub>Ar</sub>, *d*, *J* = 7.6 Hz, 1H), 8.18 (H<sub>Ar</sub>, *dd*, *J* = 8.8, 1.9 Hz, 1H), 8.10 (H<sub>Ar</sub>, *d*, *J* = 8.8 Hz, 1H), 7.62 (H<sub>Ar</sub>, *dd*, *J* = 8.3, 4.2 Hz, 1H), 4.14 ((-H<sub>b</sub>CH<sub>a</sub>-C $\equiv$ CH<sub>c</sub>), *dd*, *J* = 5.5, 2.5 Hz, 2H), 3.18 ((-H<sub>b</sub>CH<sub>a</sub>-C $\equiv$ CH<sub>c</sub>), *t*, *J* = 2.4 Hz, 1H). <sup>13</sup>C NMR (126 MHz, DMSO-d<sub>6</sub>)  $\delta$  166.0 (CO), 152.6, 149.2, 137.6, 132.1, 129.6, 128.7, 128.1, 127.6, 122.7, 81.7 (-H<sub>b</sub>CH<sub>a</sub>-C $\equiv$ CH<sub>c</sub>), 73.5 (-H<sub>b</sub>CH<sub>a</sub>-C $\equiv$ CH<sub>c</sub>), 29.2 (-H<sub>b</sub>CH<sub>a</sub>-C $\equiv$ CH<sub>c</sub>). MS (EI): *m/z* (rel. int, %): 210 (1, [M<sup>+</sup>]), 200 (8), 156 (100), 128 (58), 101 (16), 51 (8).

2-Oxo-*N*-(*prop-2-yn-1-yl*)-2-(quinolin-6-yl)acetamide (**3w**)

Yield: 100 mg (42%); orange solid, m.p: 129-131 °C, R<sub>f</sub> (90 % CHCl<sub>3</sub>, 10 % EtOAc , 1 % MeOH) 0.50; IR (KBr,  $\nu$  (cm<sup>-1</sup>)): 3280 *m*, 1684 *m*, 1671 *vs*, 1614 *m*, 1507 *m*, 1419 *m*, 1325 *w*, 1265 *m*, 1173 *m*, 815 *m*, 680 *w*. <sup>1</sup>H NMR (500 MHz, CDCl<sub>3</sub>)  $\delta$  9.24 (H<sub>Ar</sub>, *d*, *J* = 1.6 Hz, 1H), 9.05 (H<sub>Ar</sub>, *dd*, *J* = 4.2, 1.6 Hz, 1H), 8.44 (H<sub>Ar</sub>, *dd*, *J* = 8.9, 1.8 Hz, 1H), 8.35 (H<sub>Ar</sub>, *d*, *J* = 8.1 Hz, 1H), 8.20 (H<sub>Ar</sub>, *d*, *J* = 8.9 Hz, 1H), 7.57 (NH, *br s*, 1H), 7.53 (H<sub>Ar</sub>, *dd*, *J* = 8.3, 4.3 Hz, 1H), 4.25 ((-H<sub>b</sub>CH<sub>a</sub>-C $\equiv$ CH<sub>c</sub>), *dd*, *J* = 5.6, 2.5 Hz, 2H), 2.34 ((-H<sub>b</sub>CH<sub>a</sub>-C $\equiv$ CH<sub>c</sub>), *t*, *J* = 2.5 Hz, 1H). <sup>13</sup>C NMR (126 MHz, CDCl<sub>3</sub>)  $\delta$  185.7 (CO), 161.1 (CO), 153.1, 150.2, 138.6, 134.9, 130.9, 129.8, 129.3, 127.4, 122.1, 78.6 (-H<sub>b</sub>CH<sub>a</sub>-C $\equiv$ CH<sub>c</sub>), 72.5 (-H<sub>b</sub>CH<sub>a</sub>-C $\equiv$ CH<sub>c</sub>), 29.3 (-H<sub>b</sub>CH<sub>a</sub>-C $\equiv$ CH<sub>c</sub>). MS (EI): *m/z* (rel. int, %): 238 (2, [M<sup>+</sup>]), 156 (100), 128 (45), 101 (15), 75 (8), 51 (4).

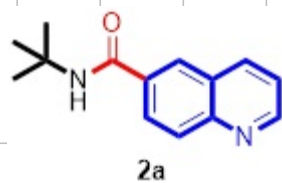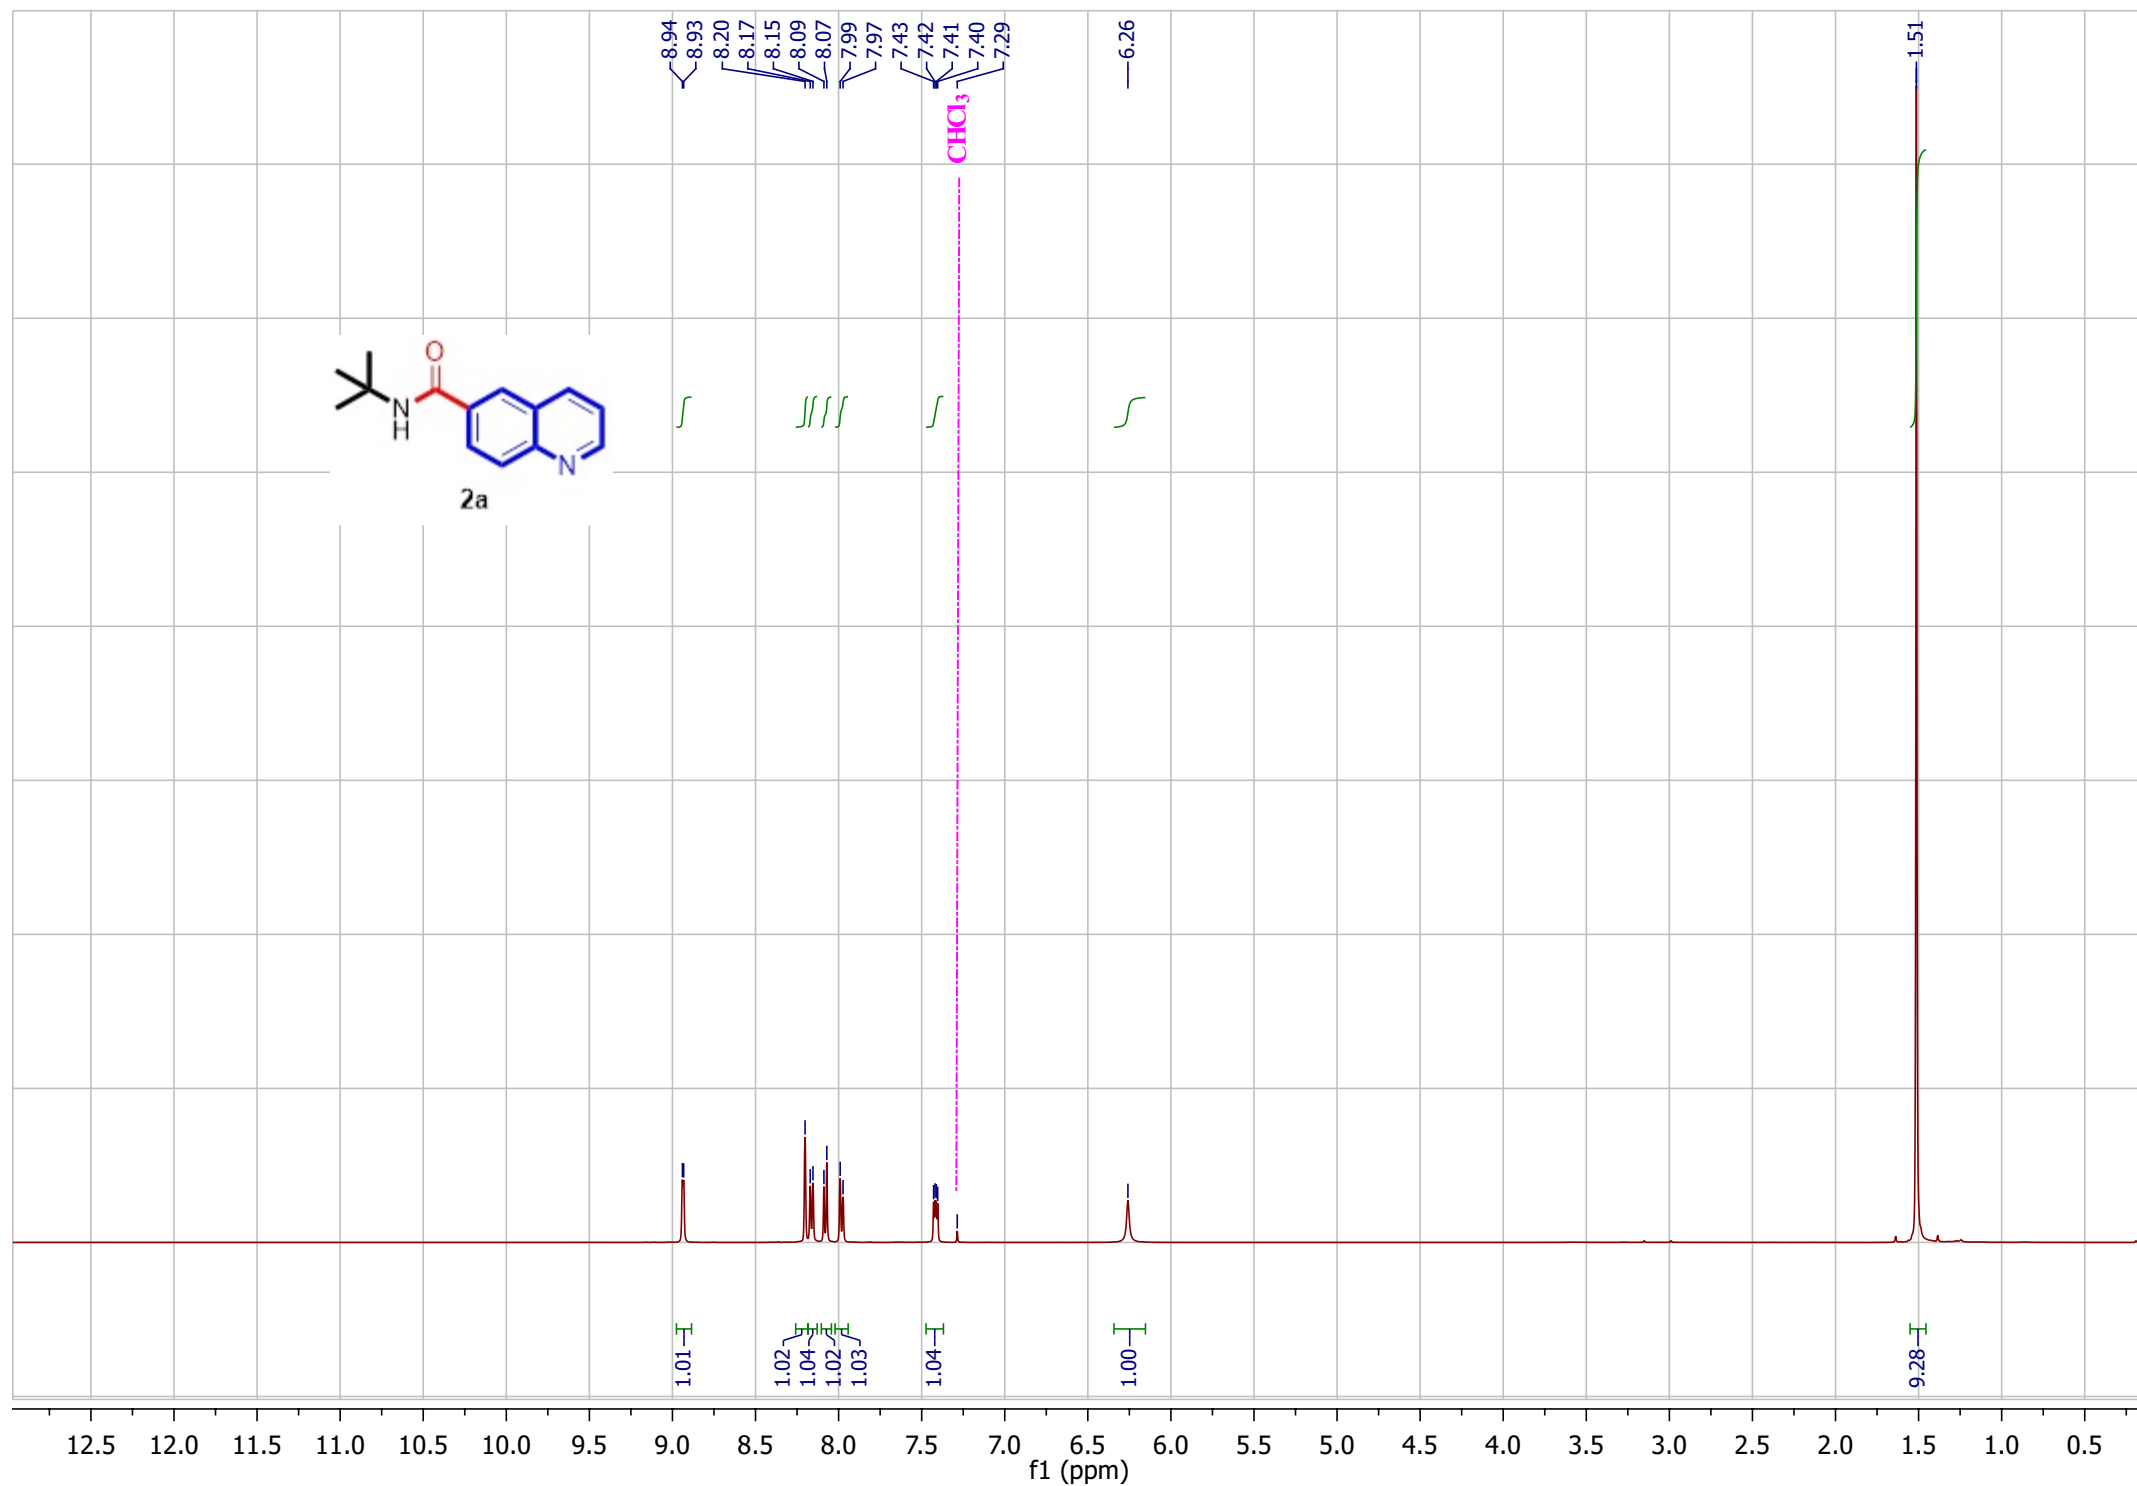

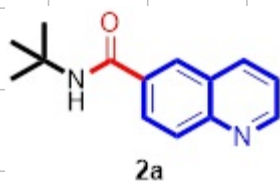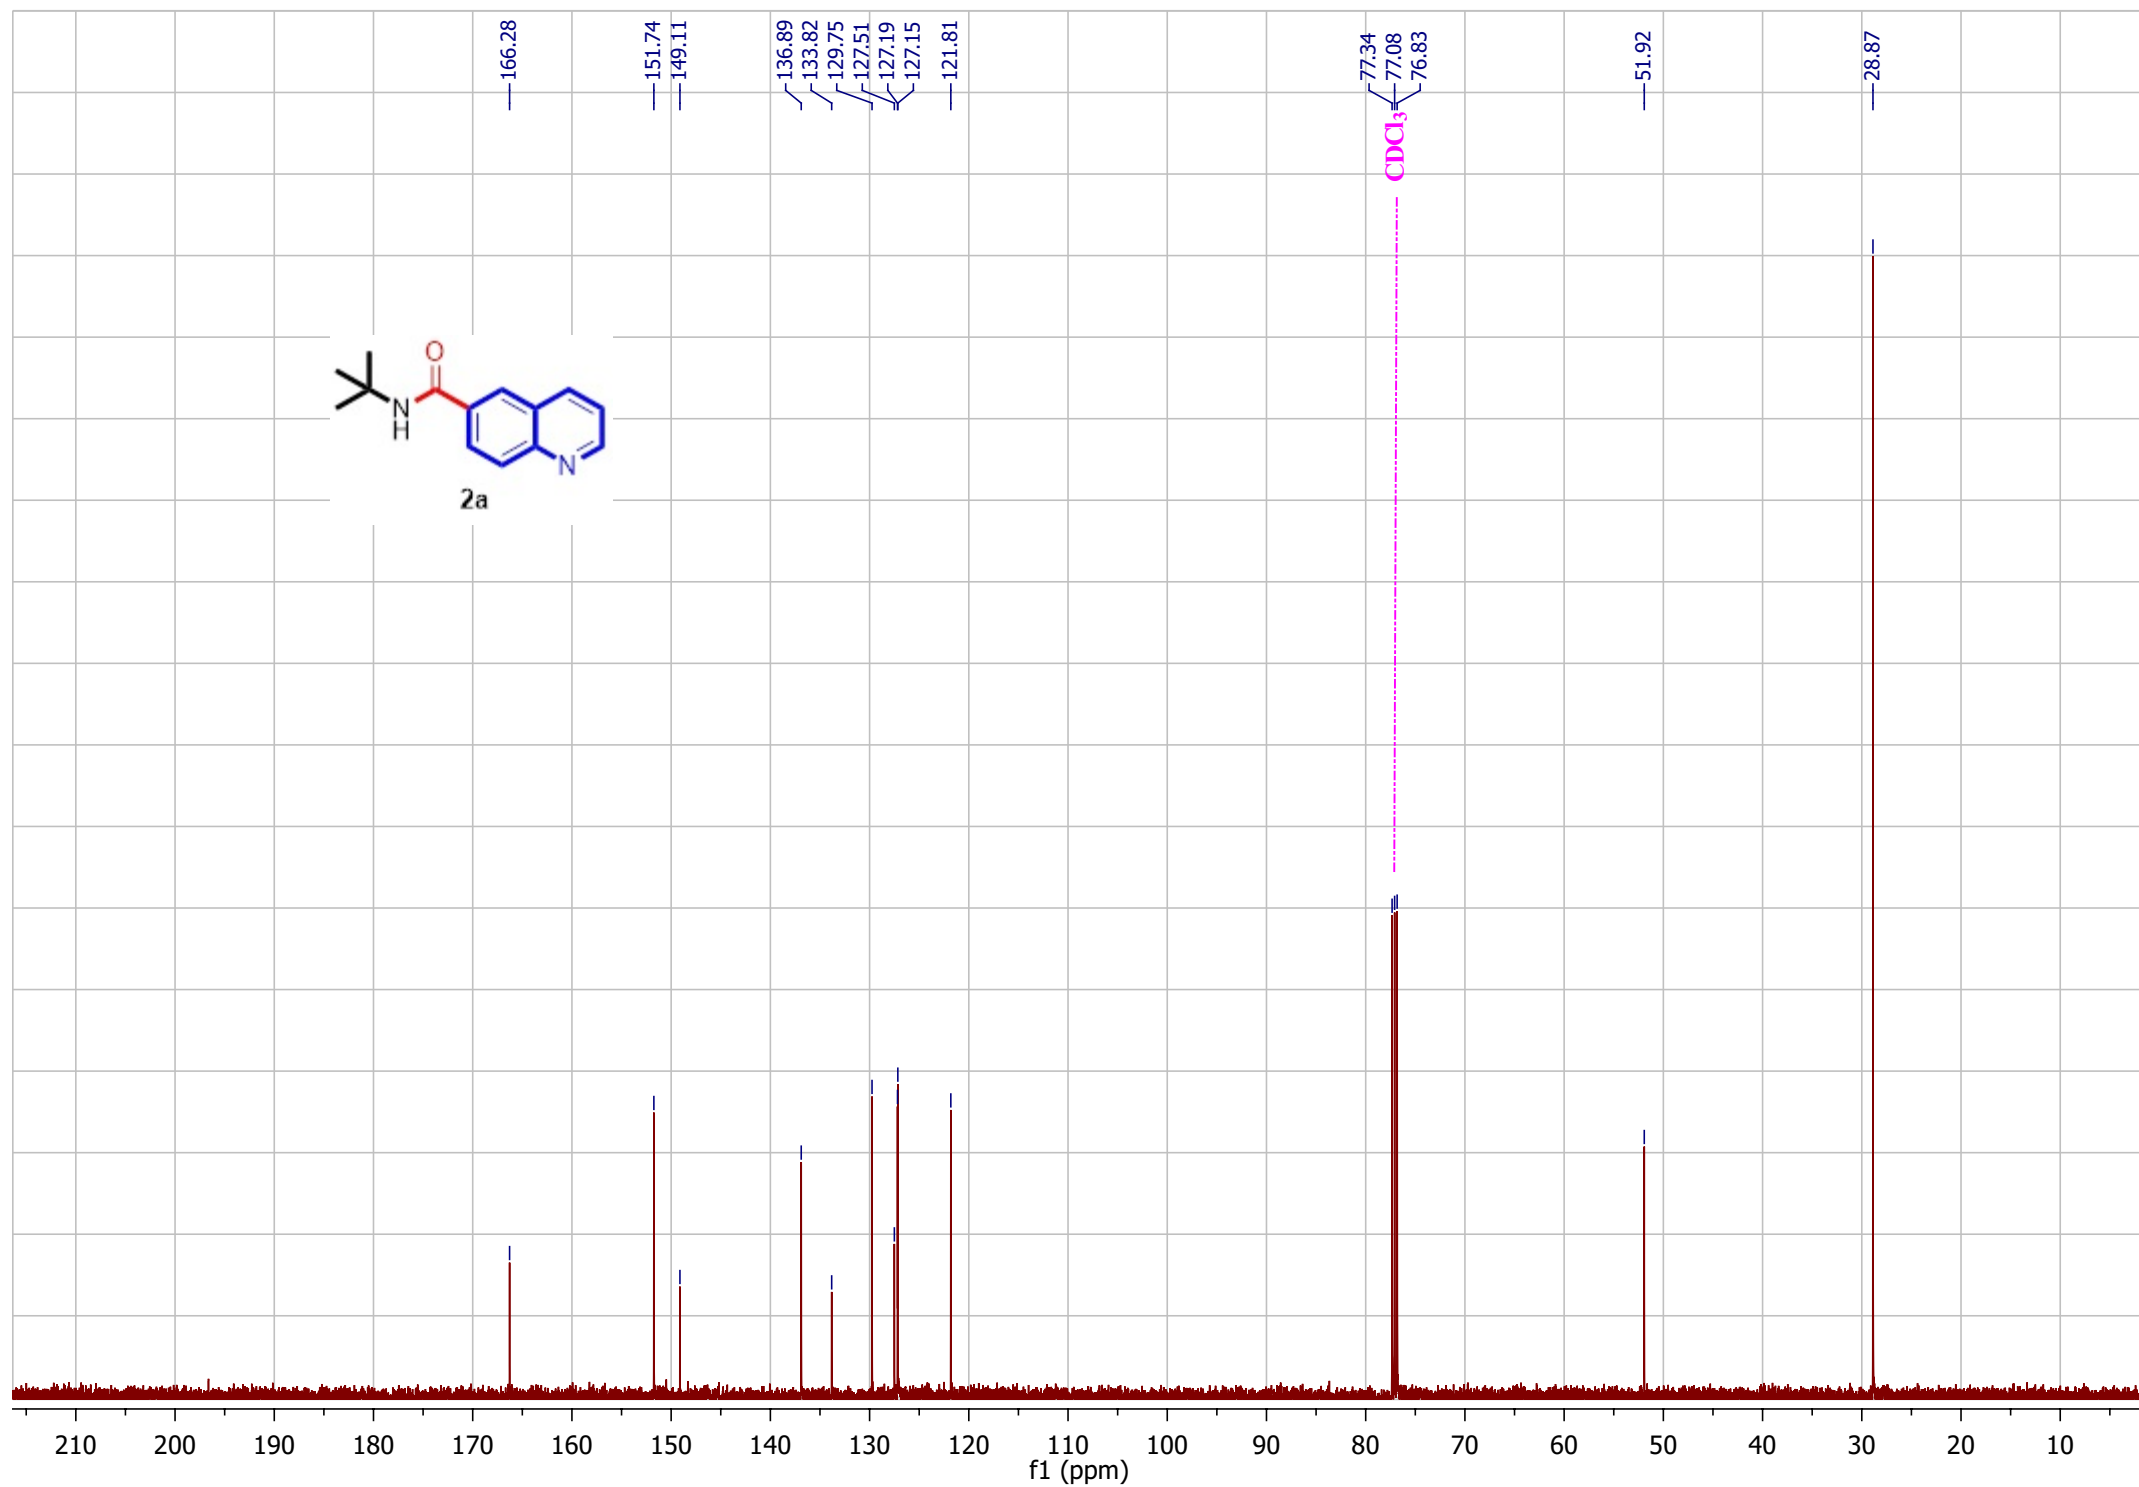

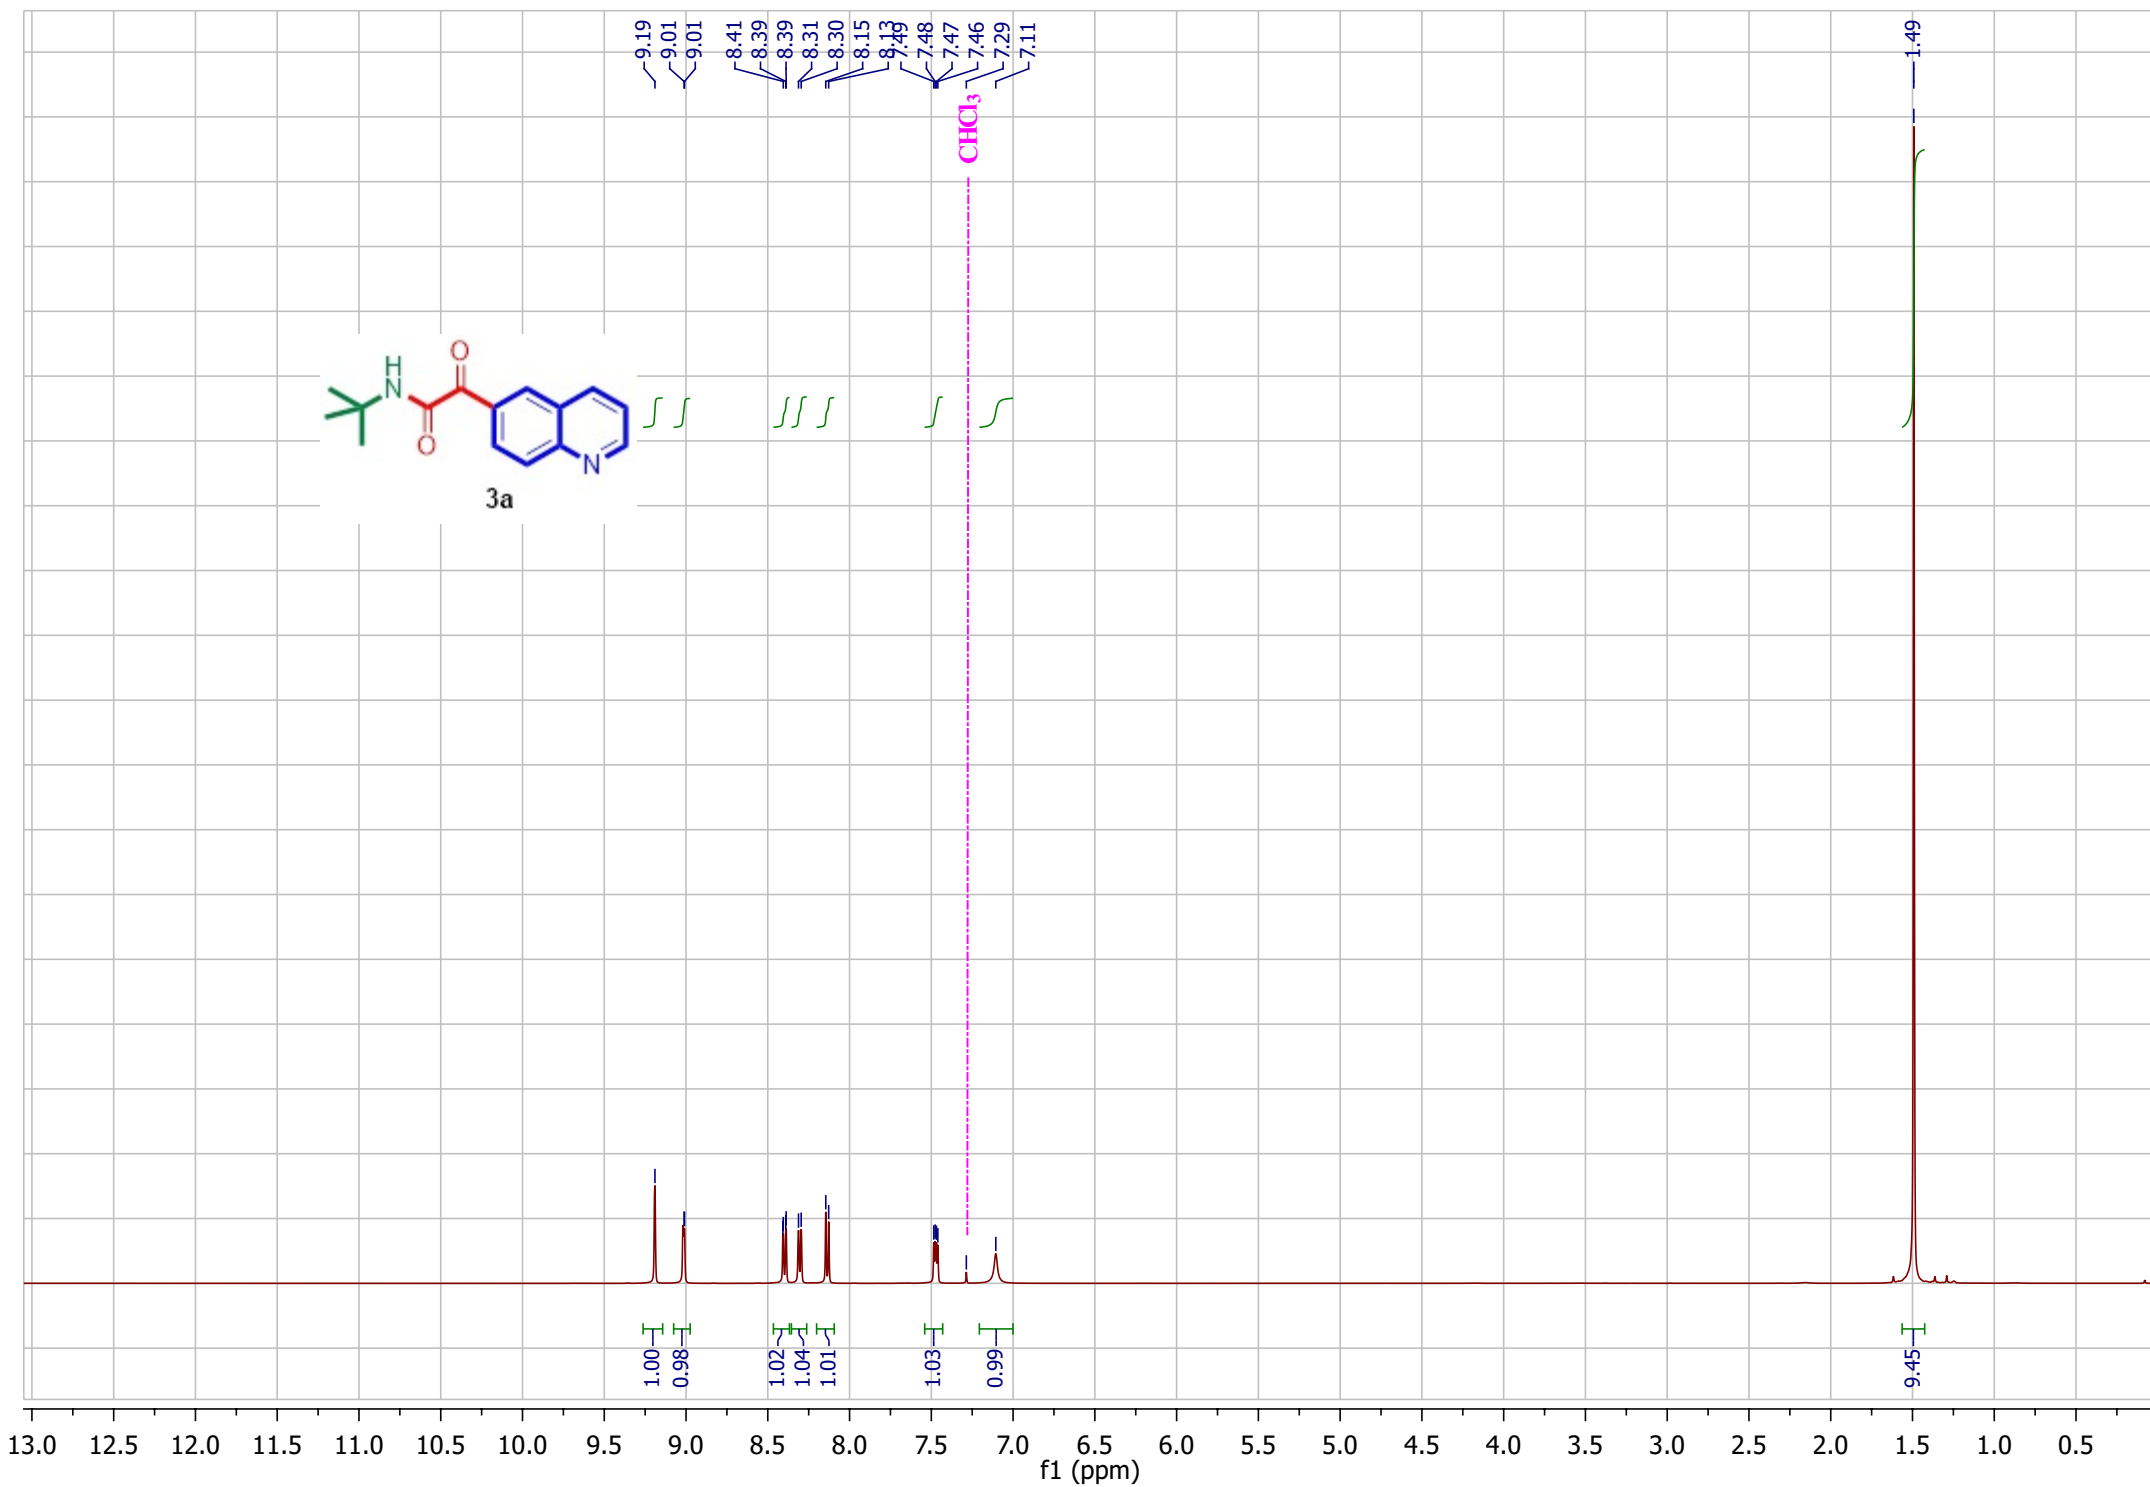

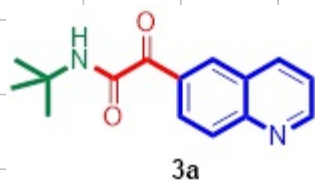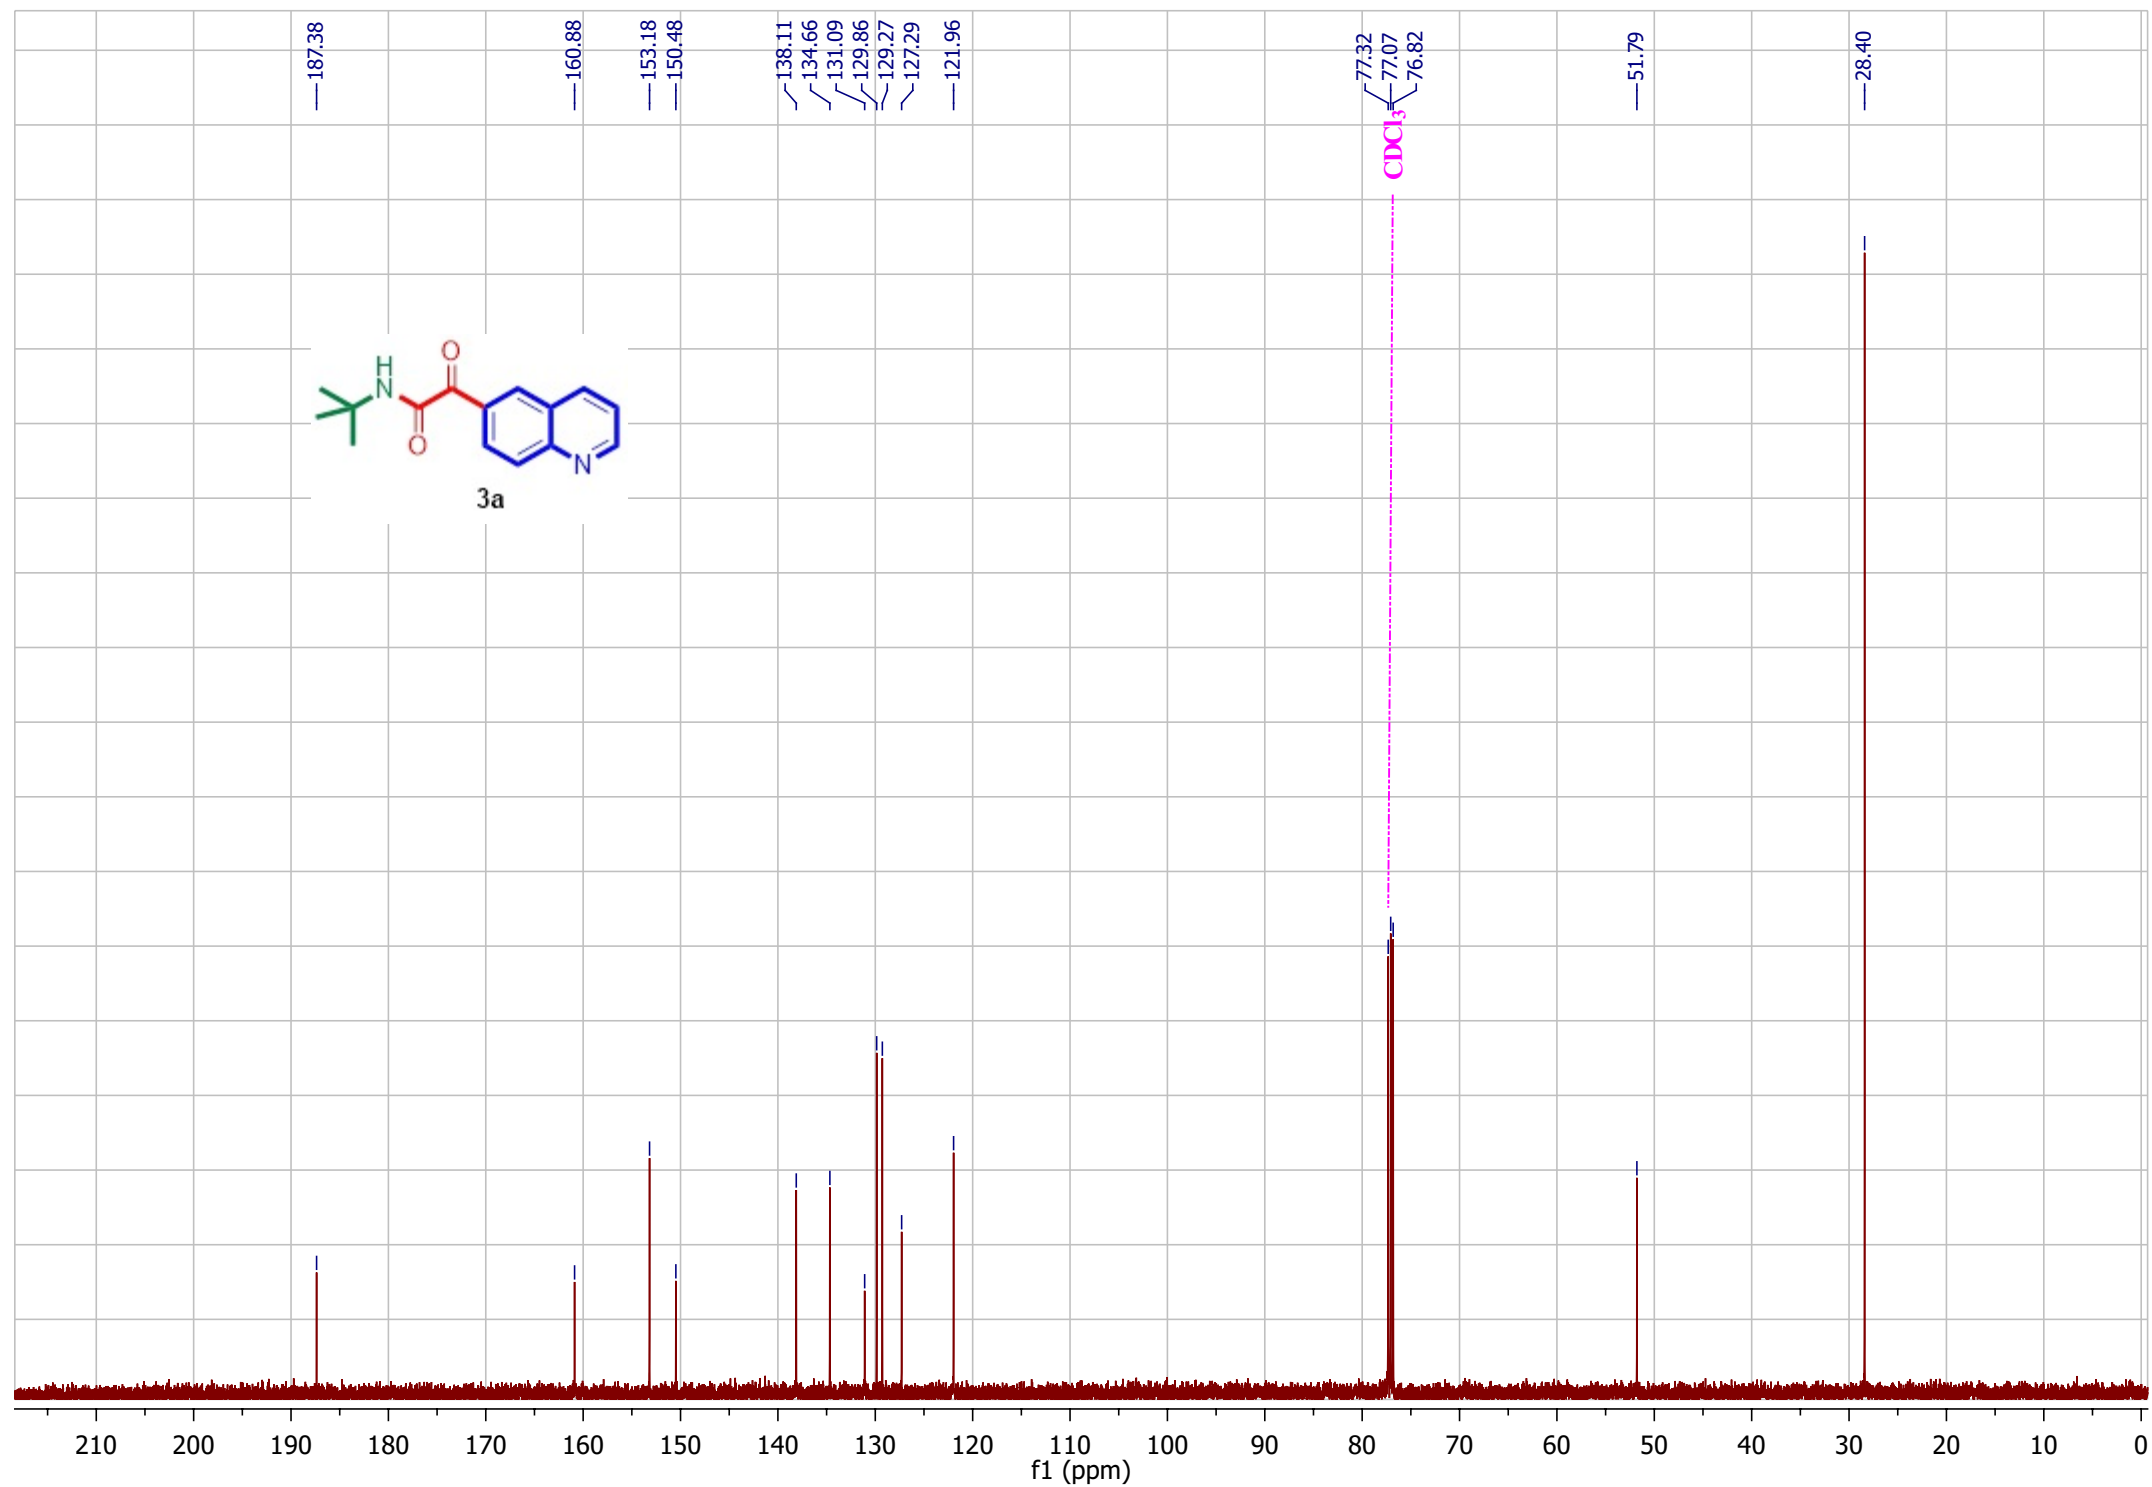

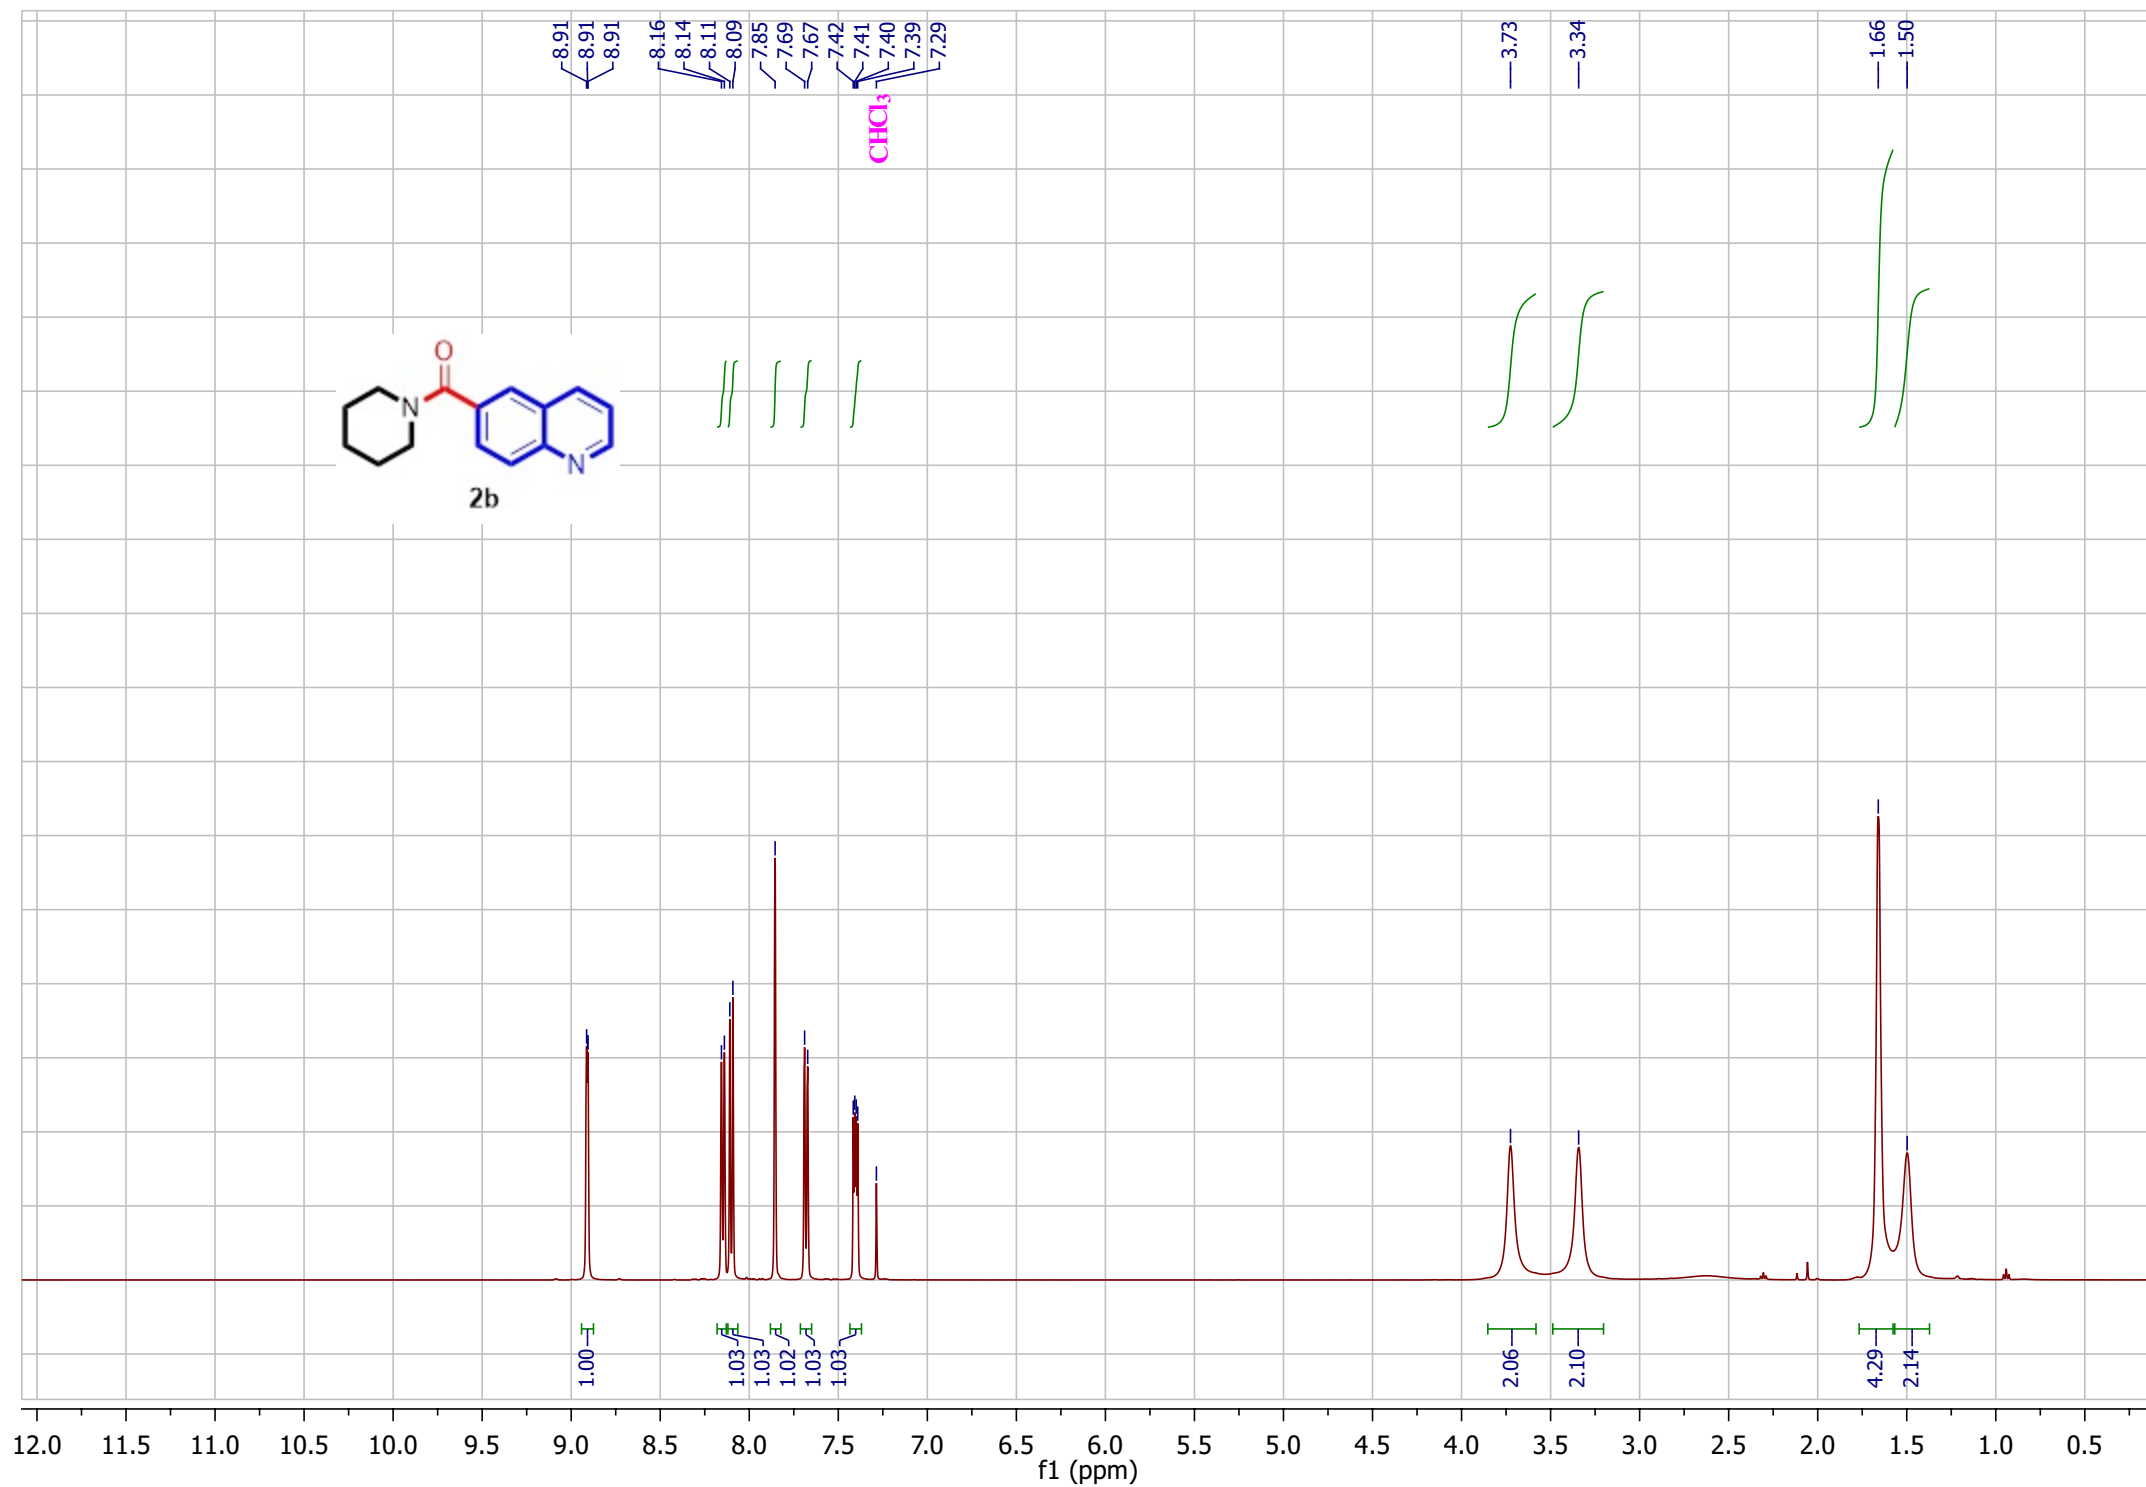



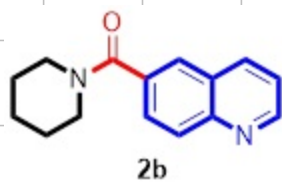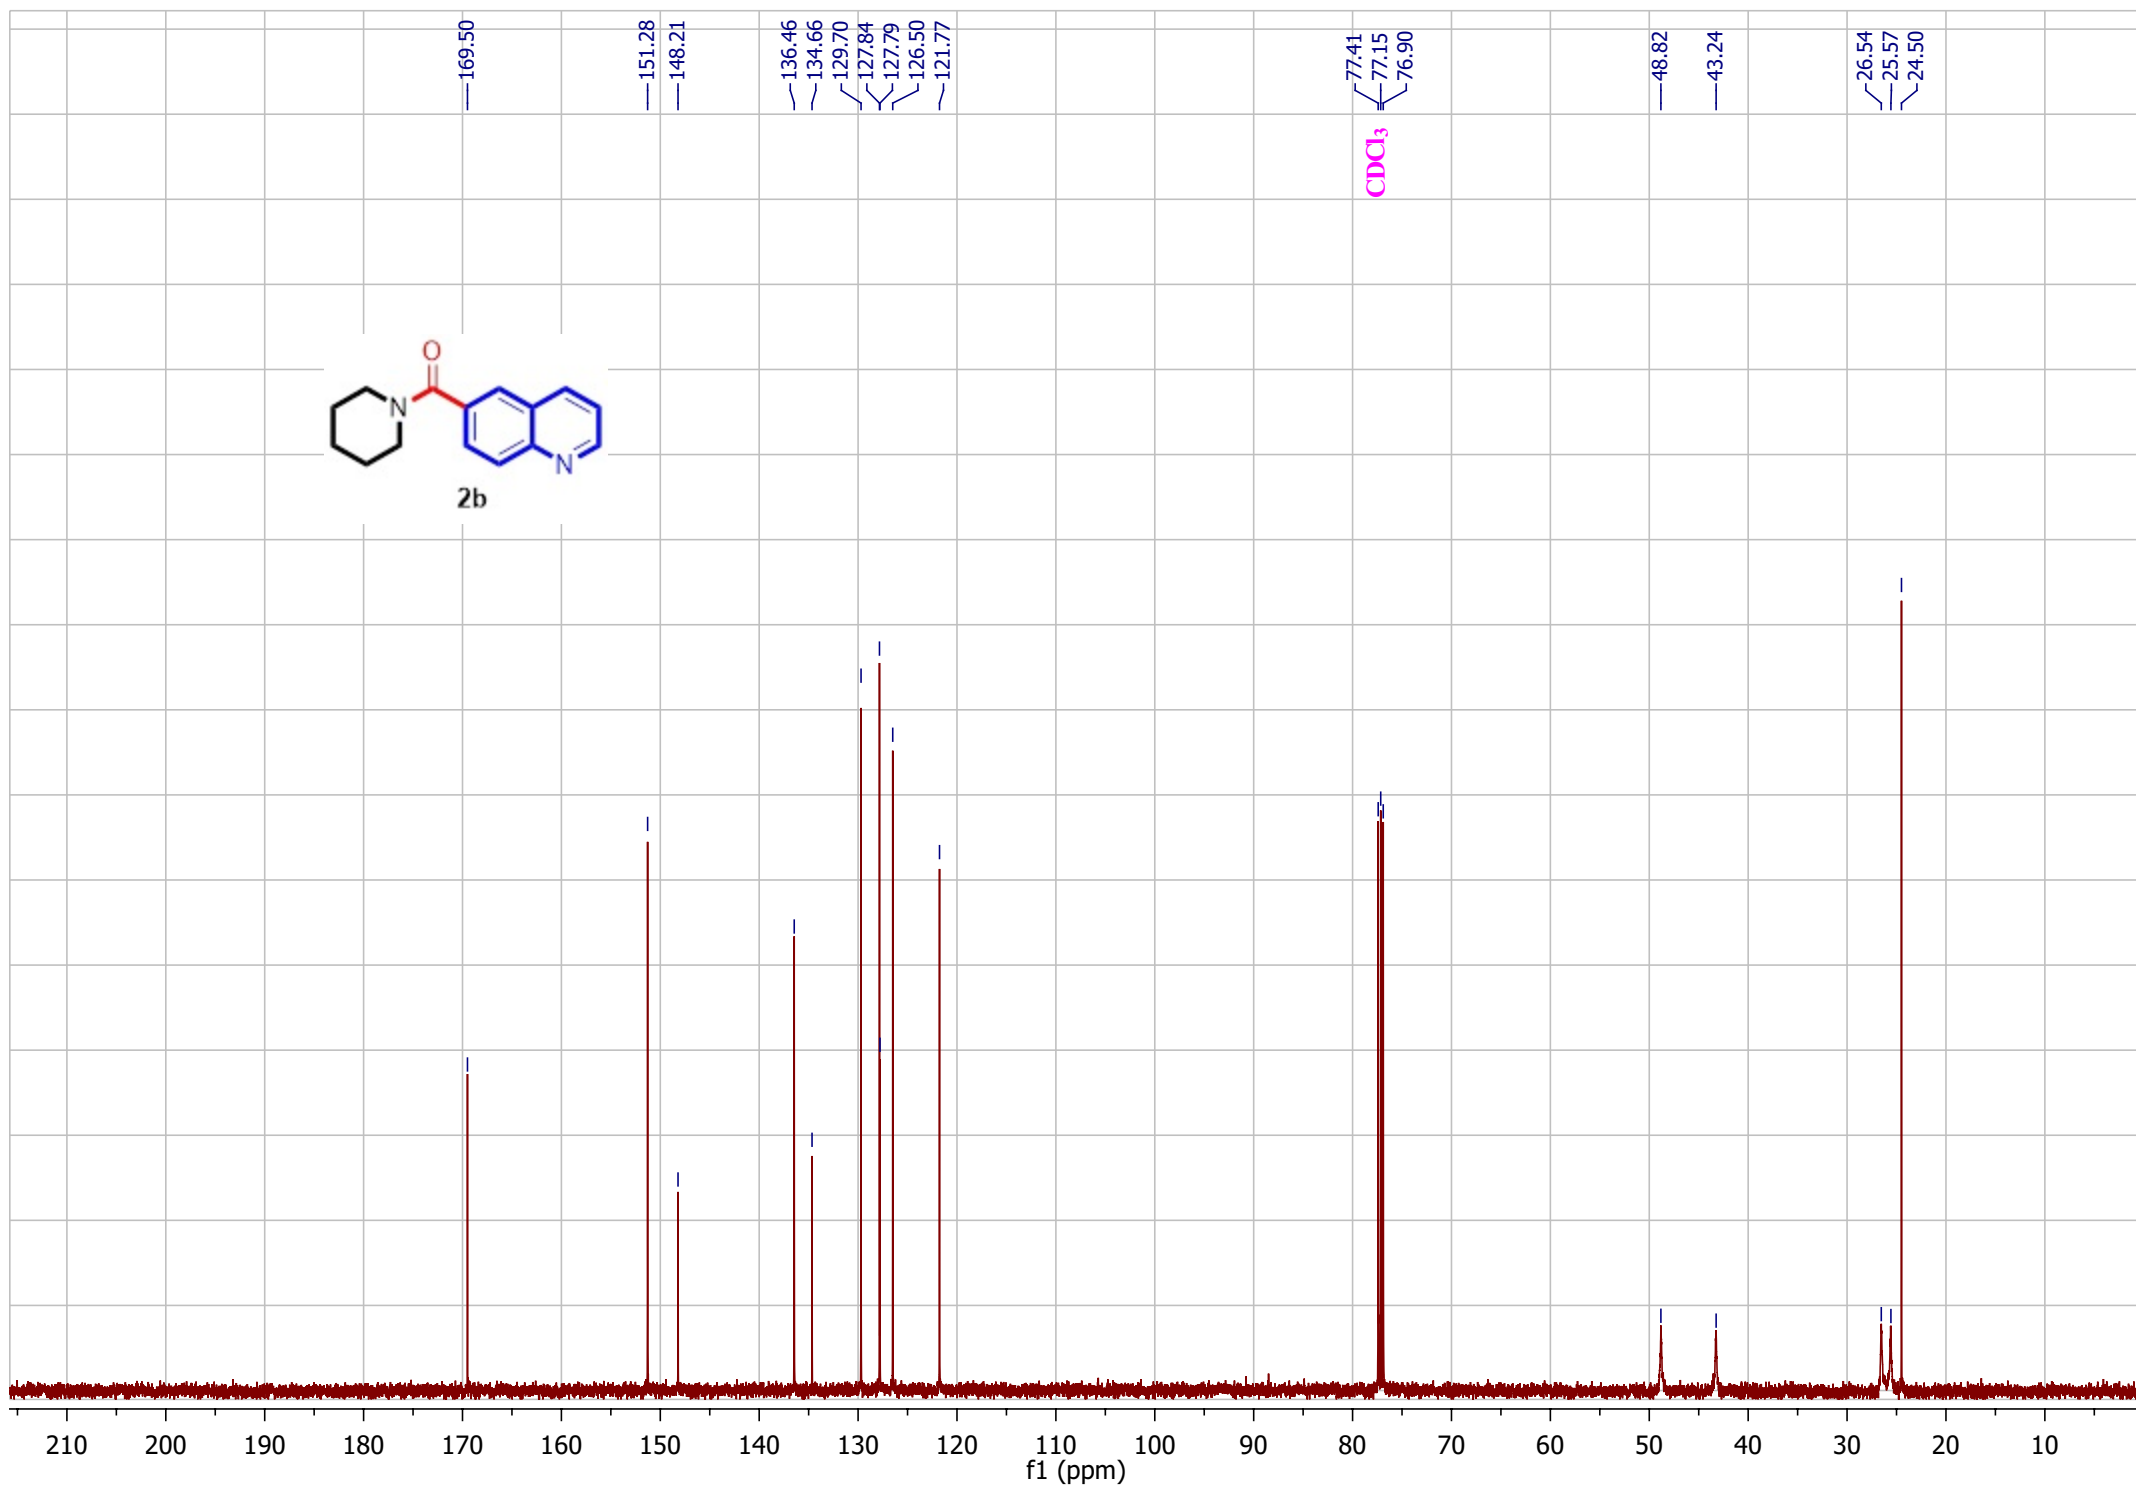

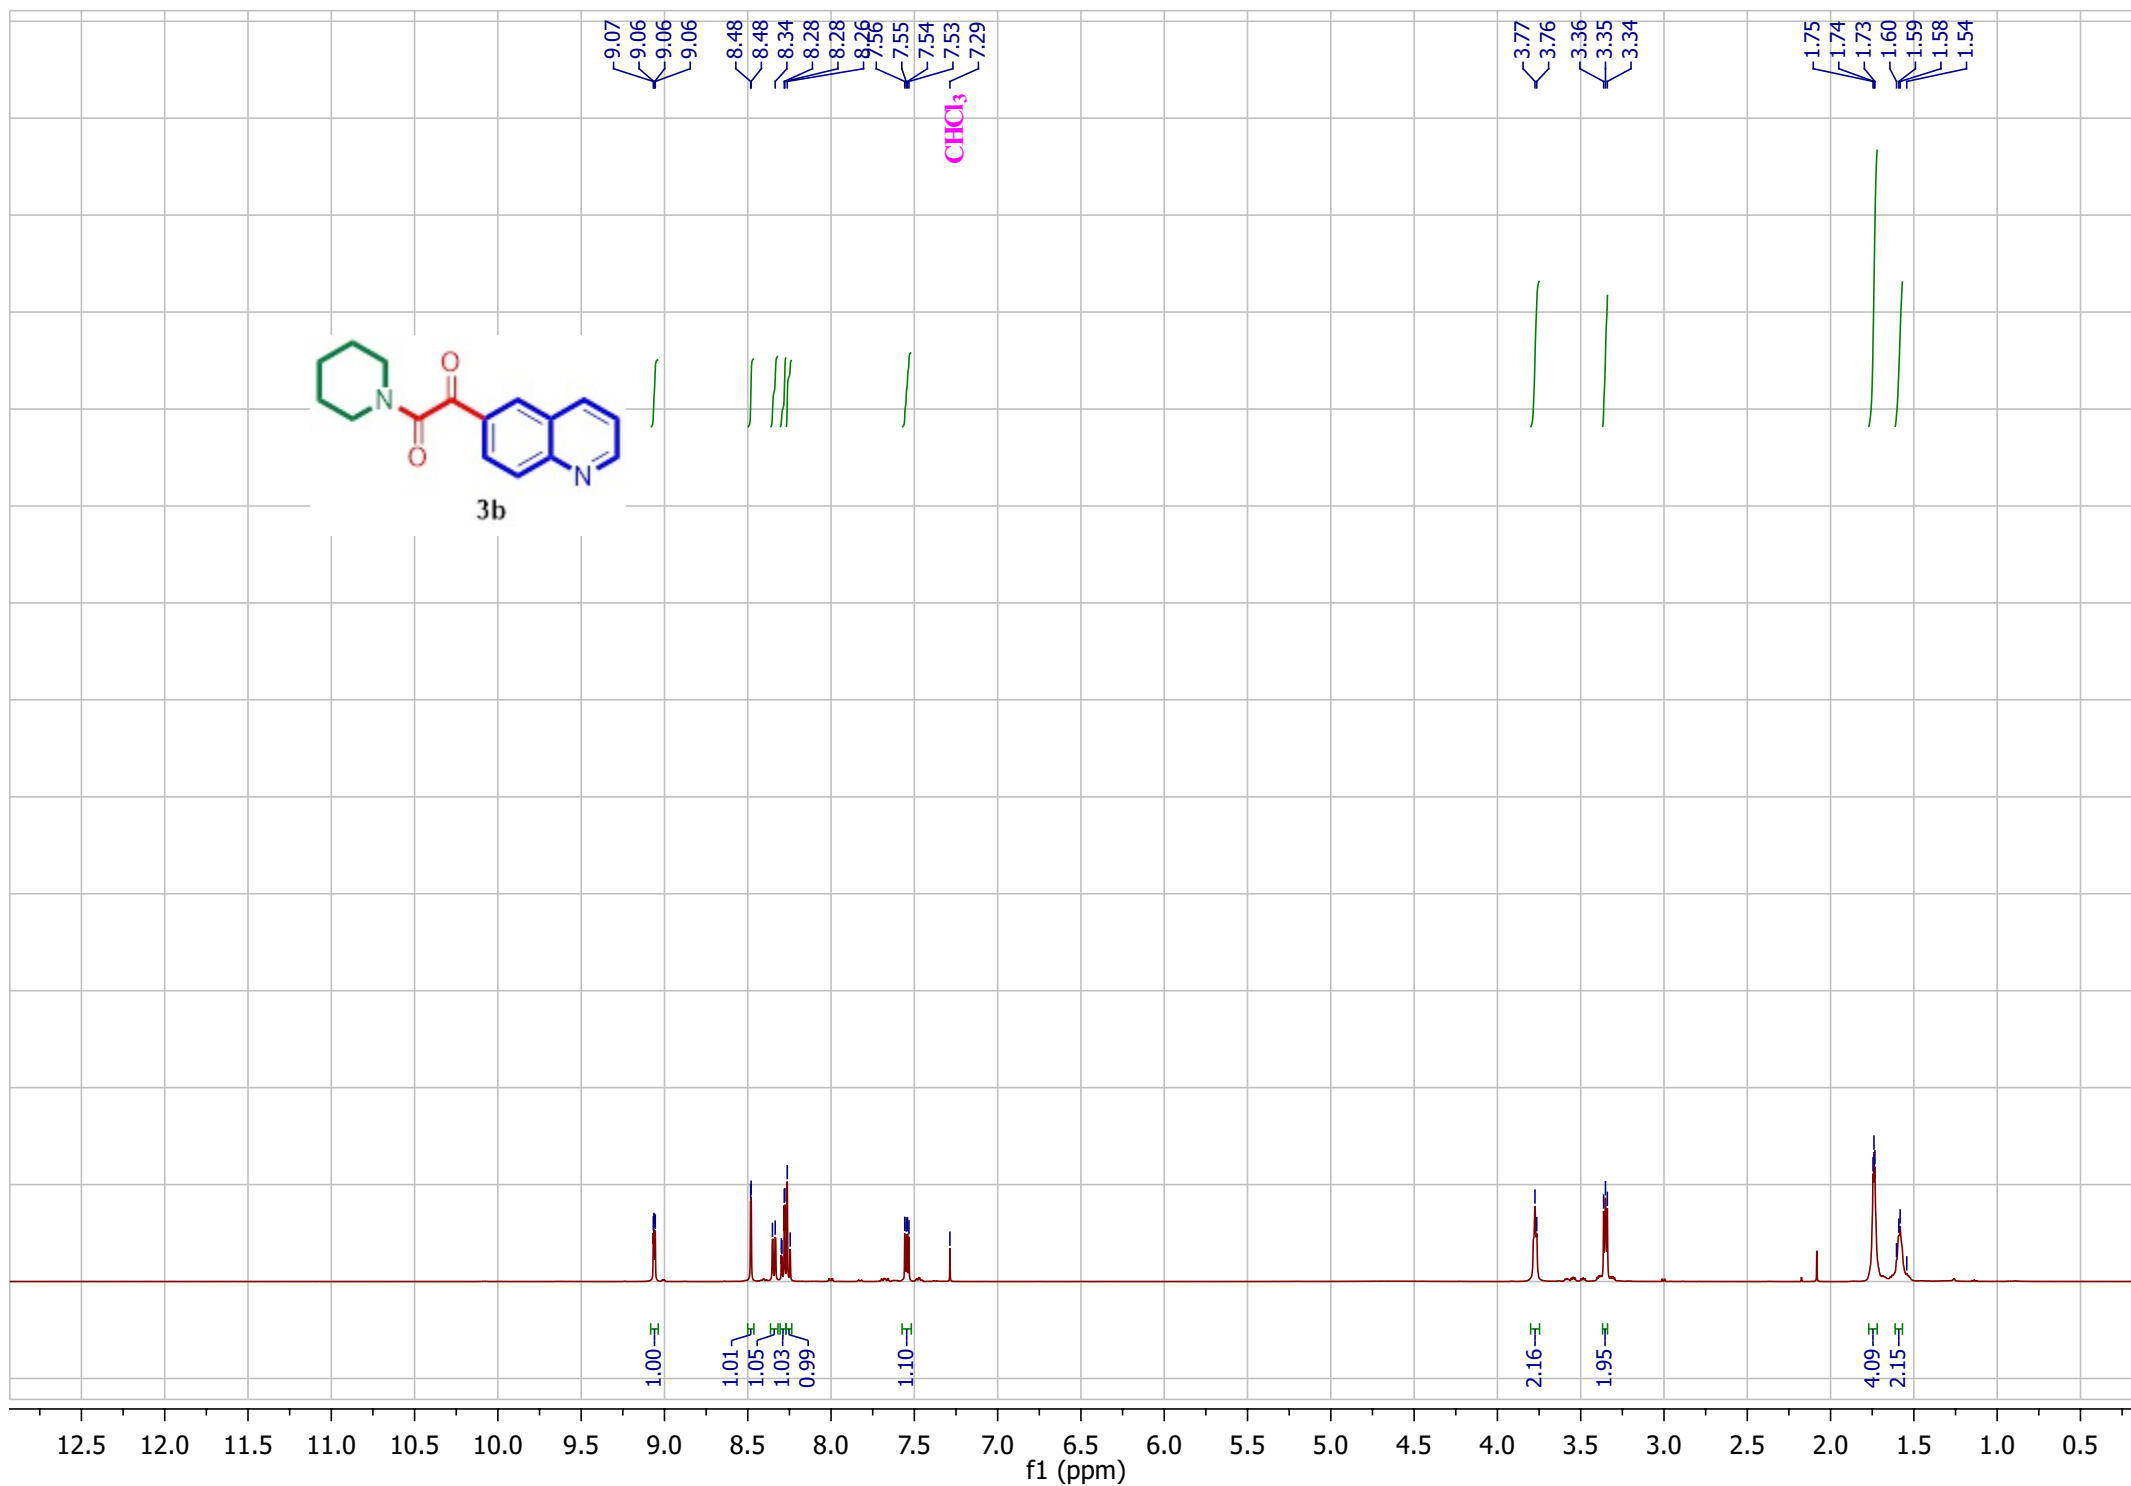

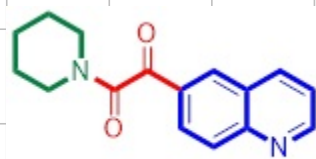

3b

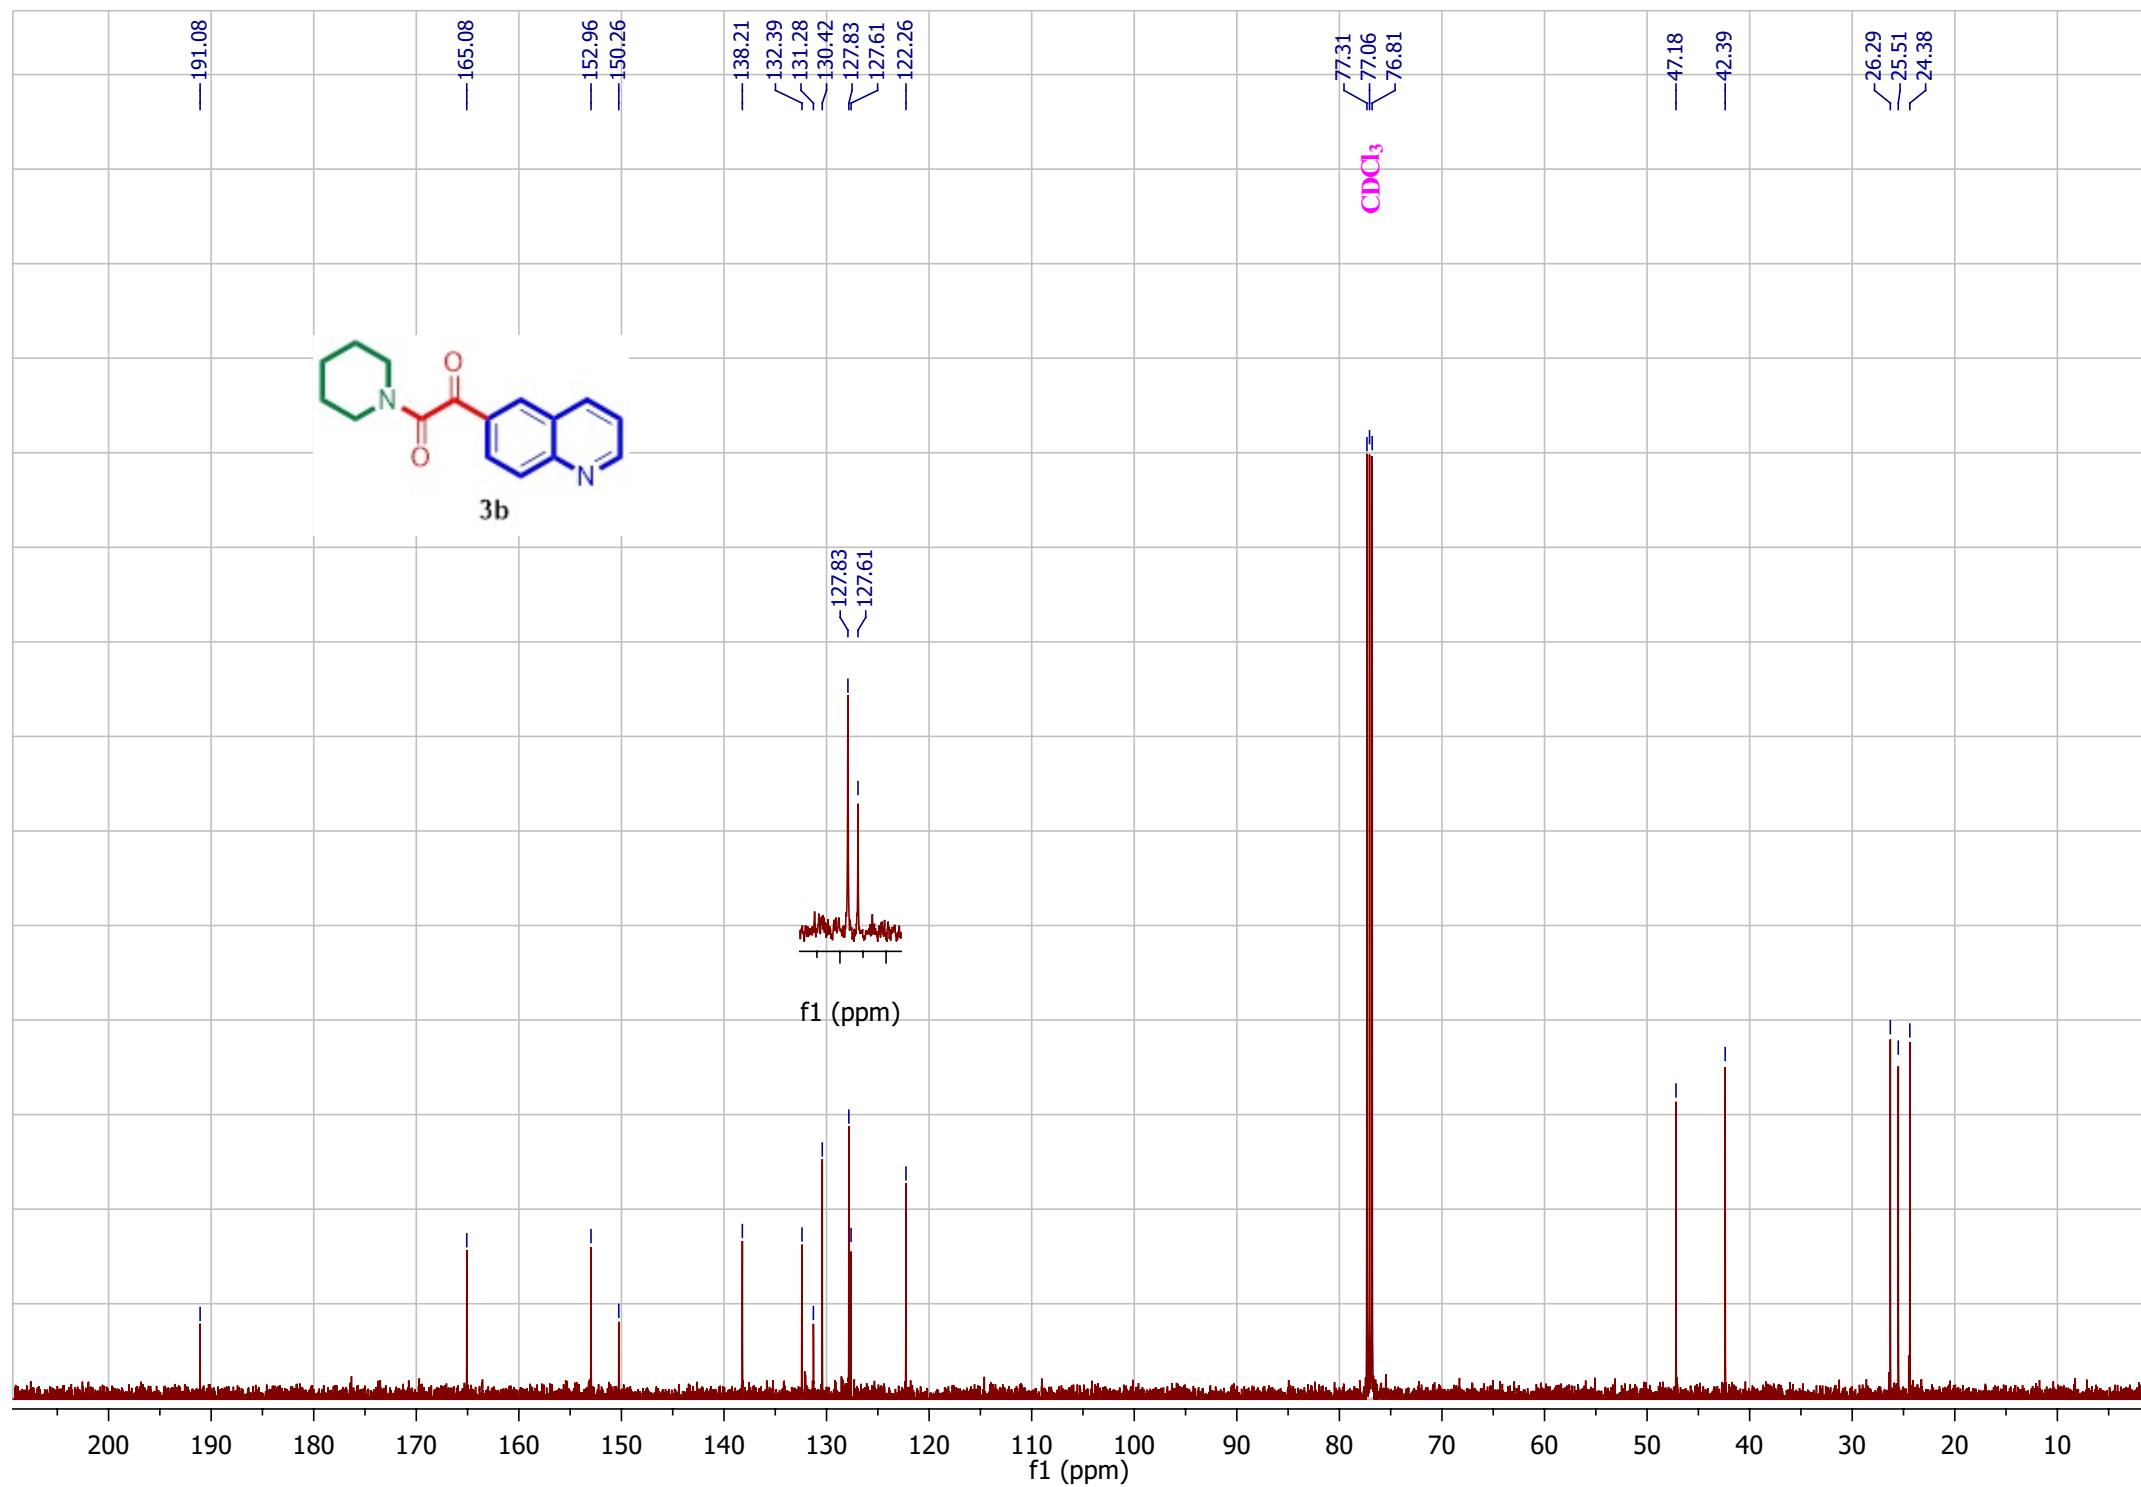

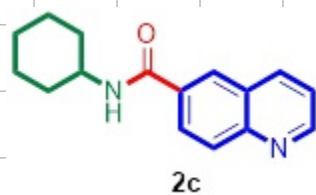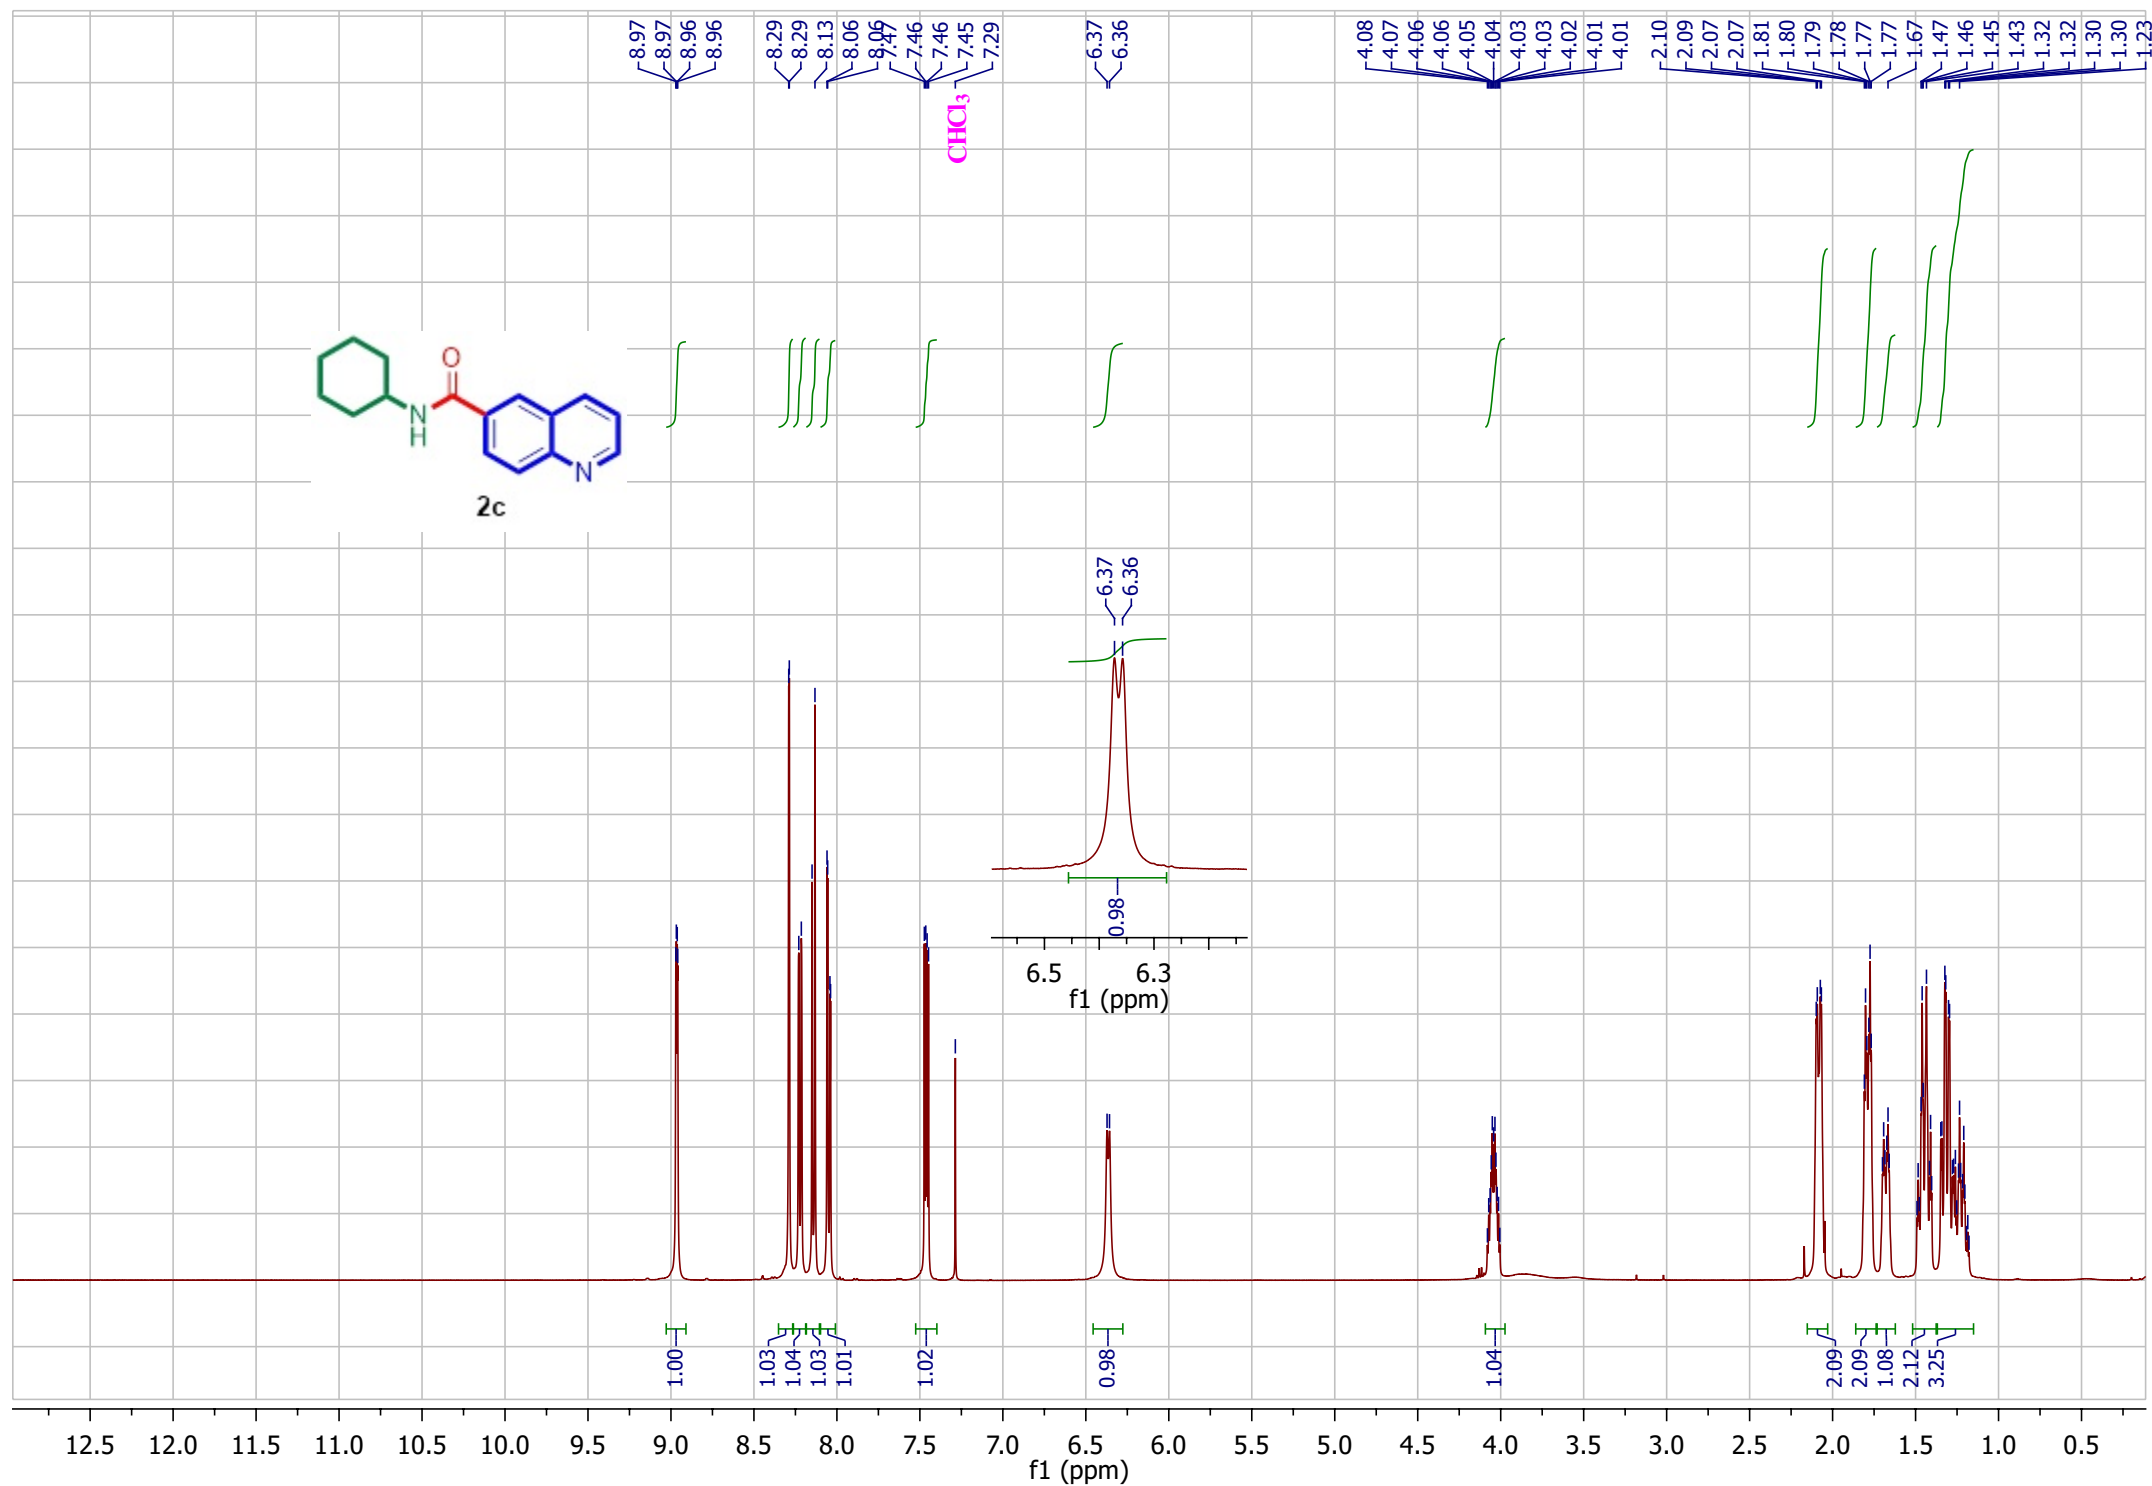

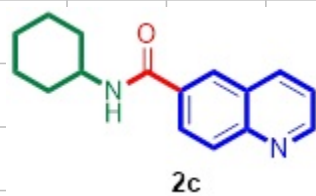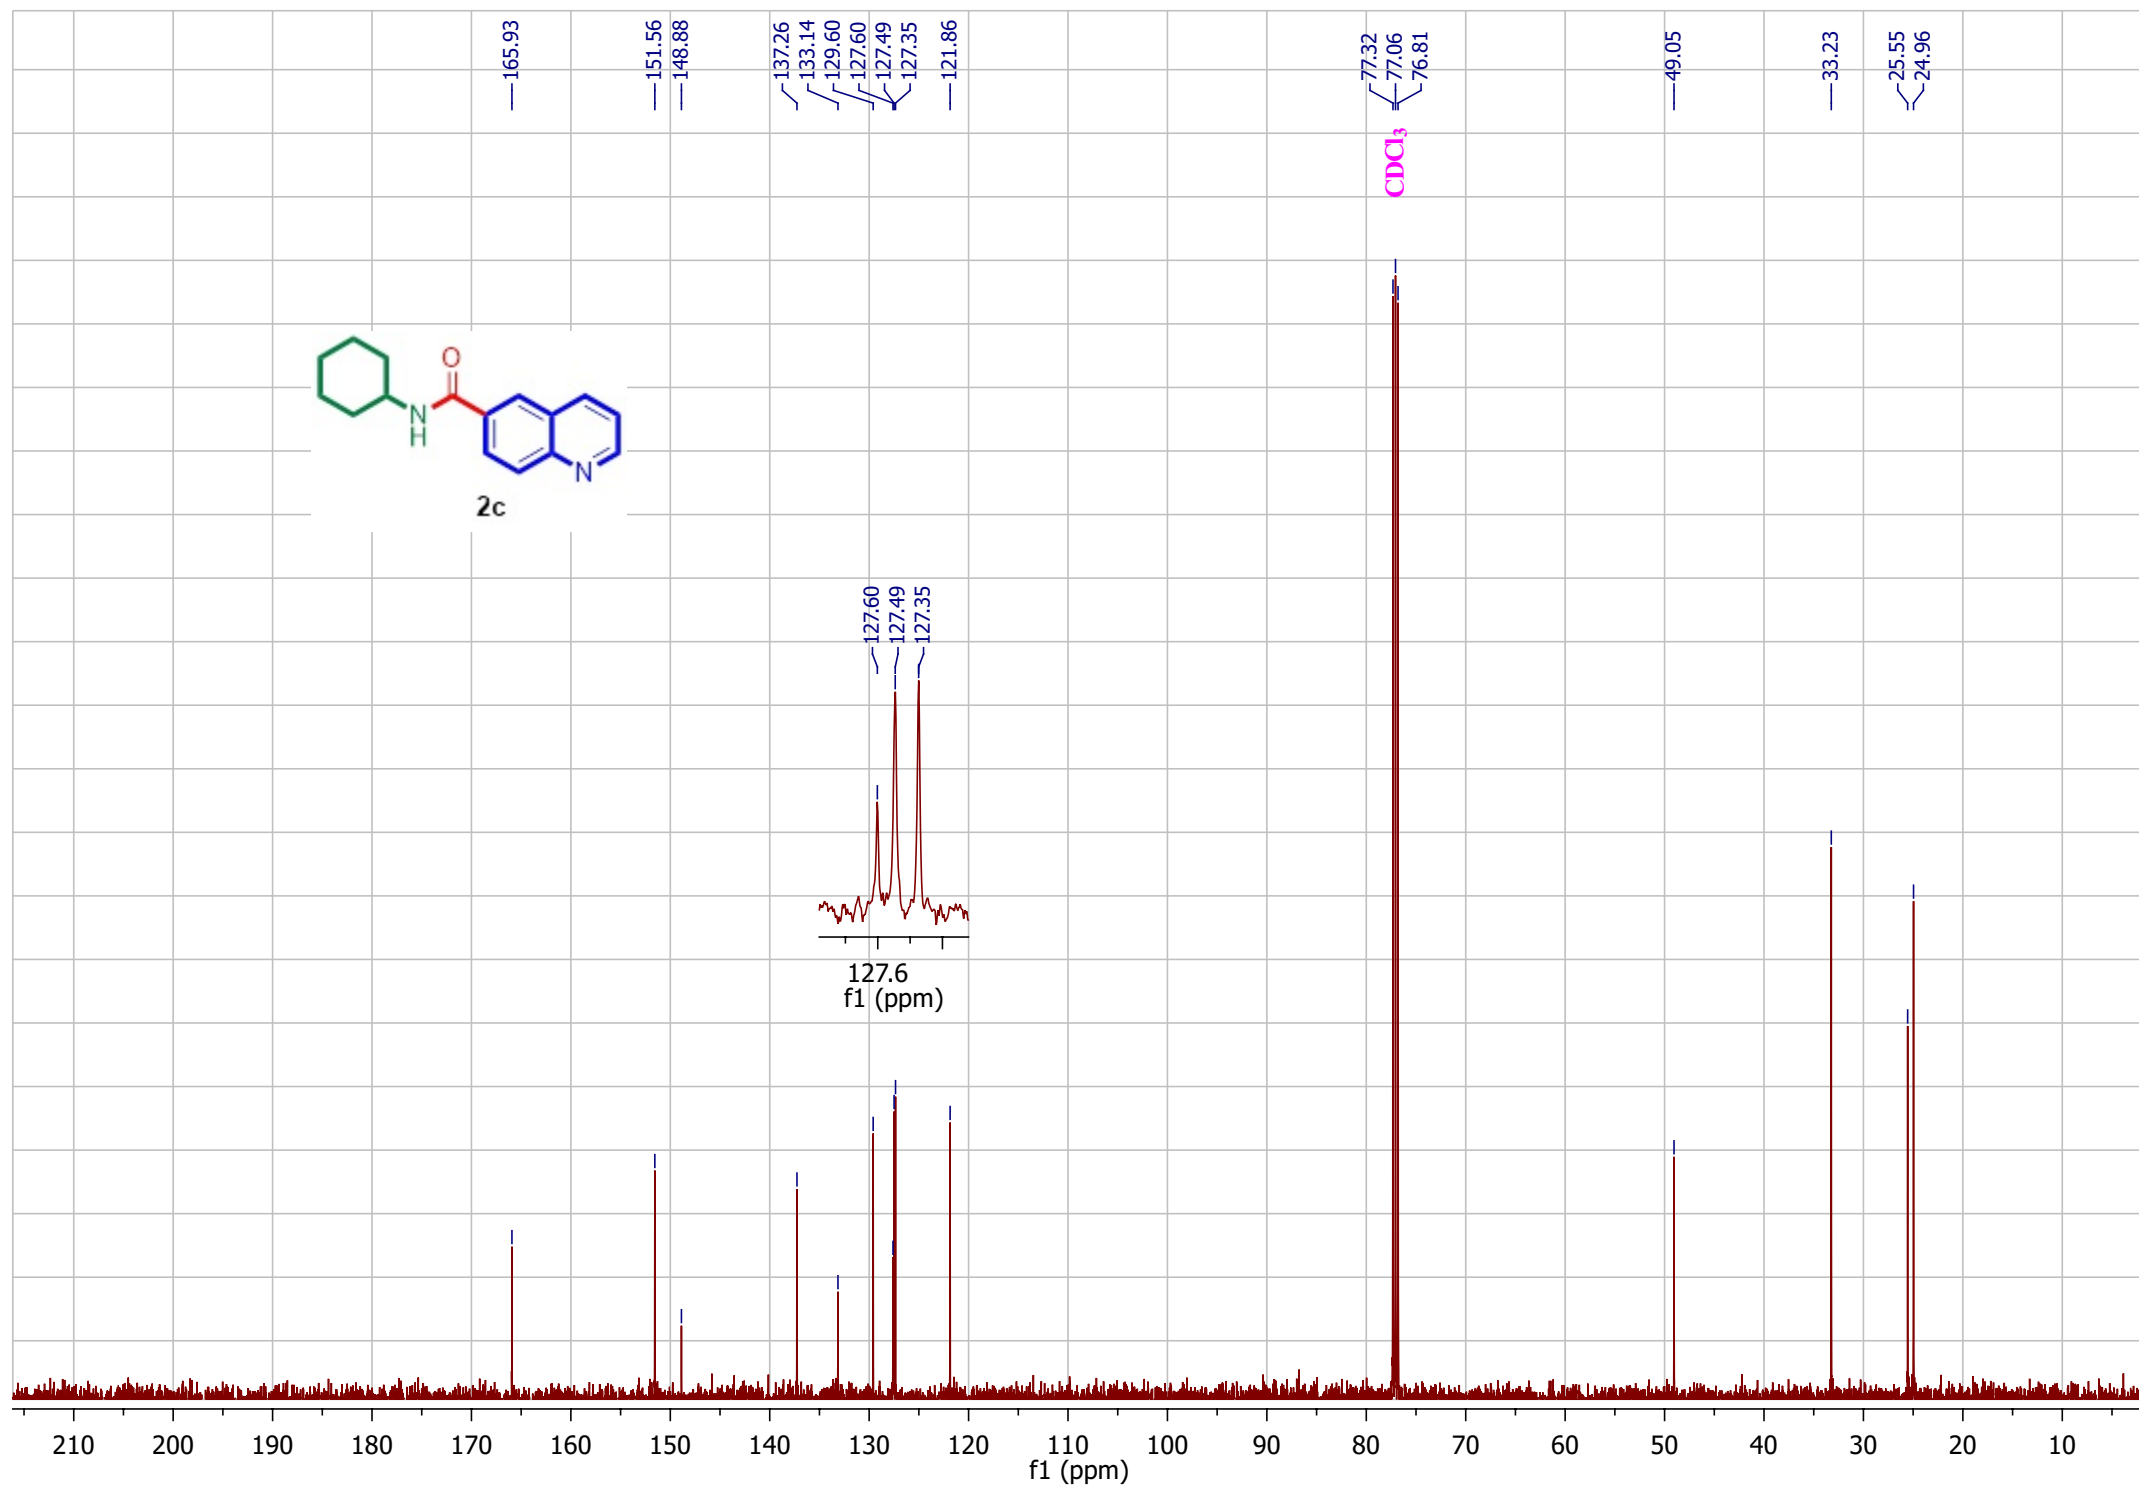

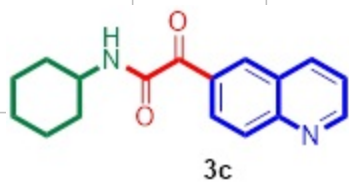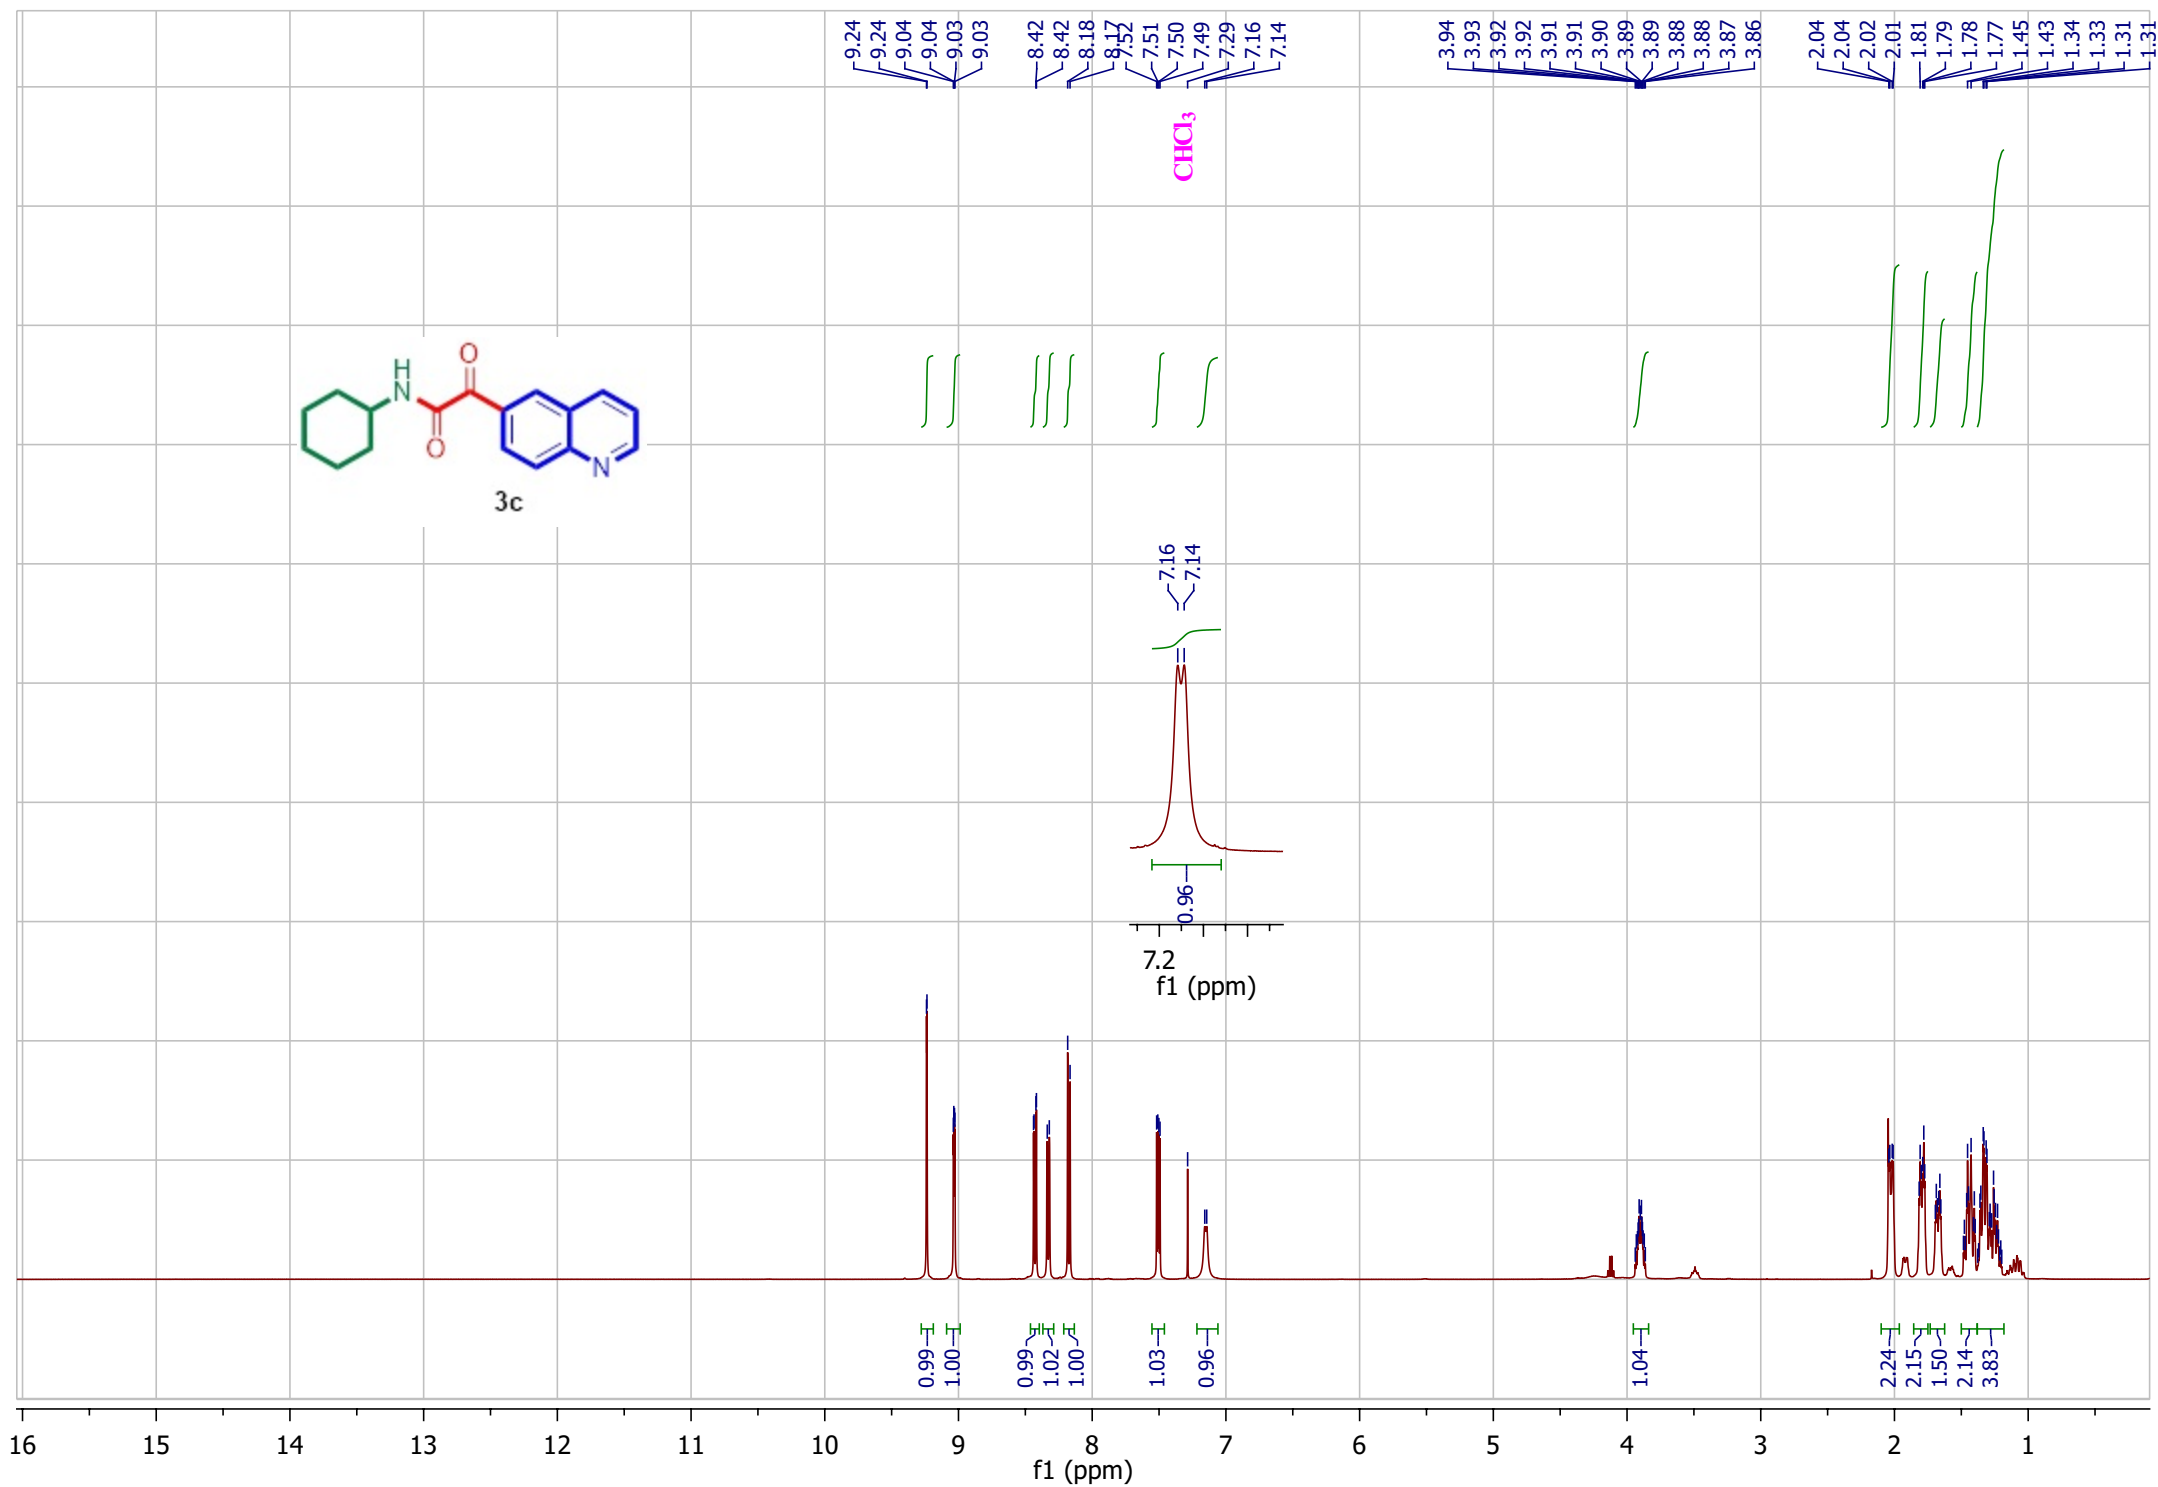

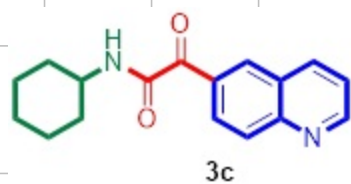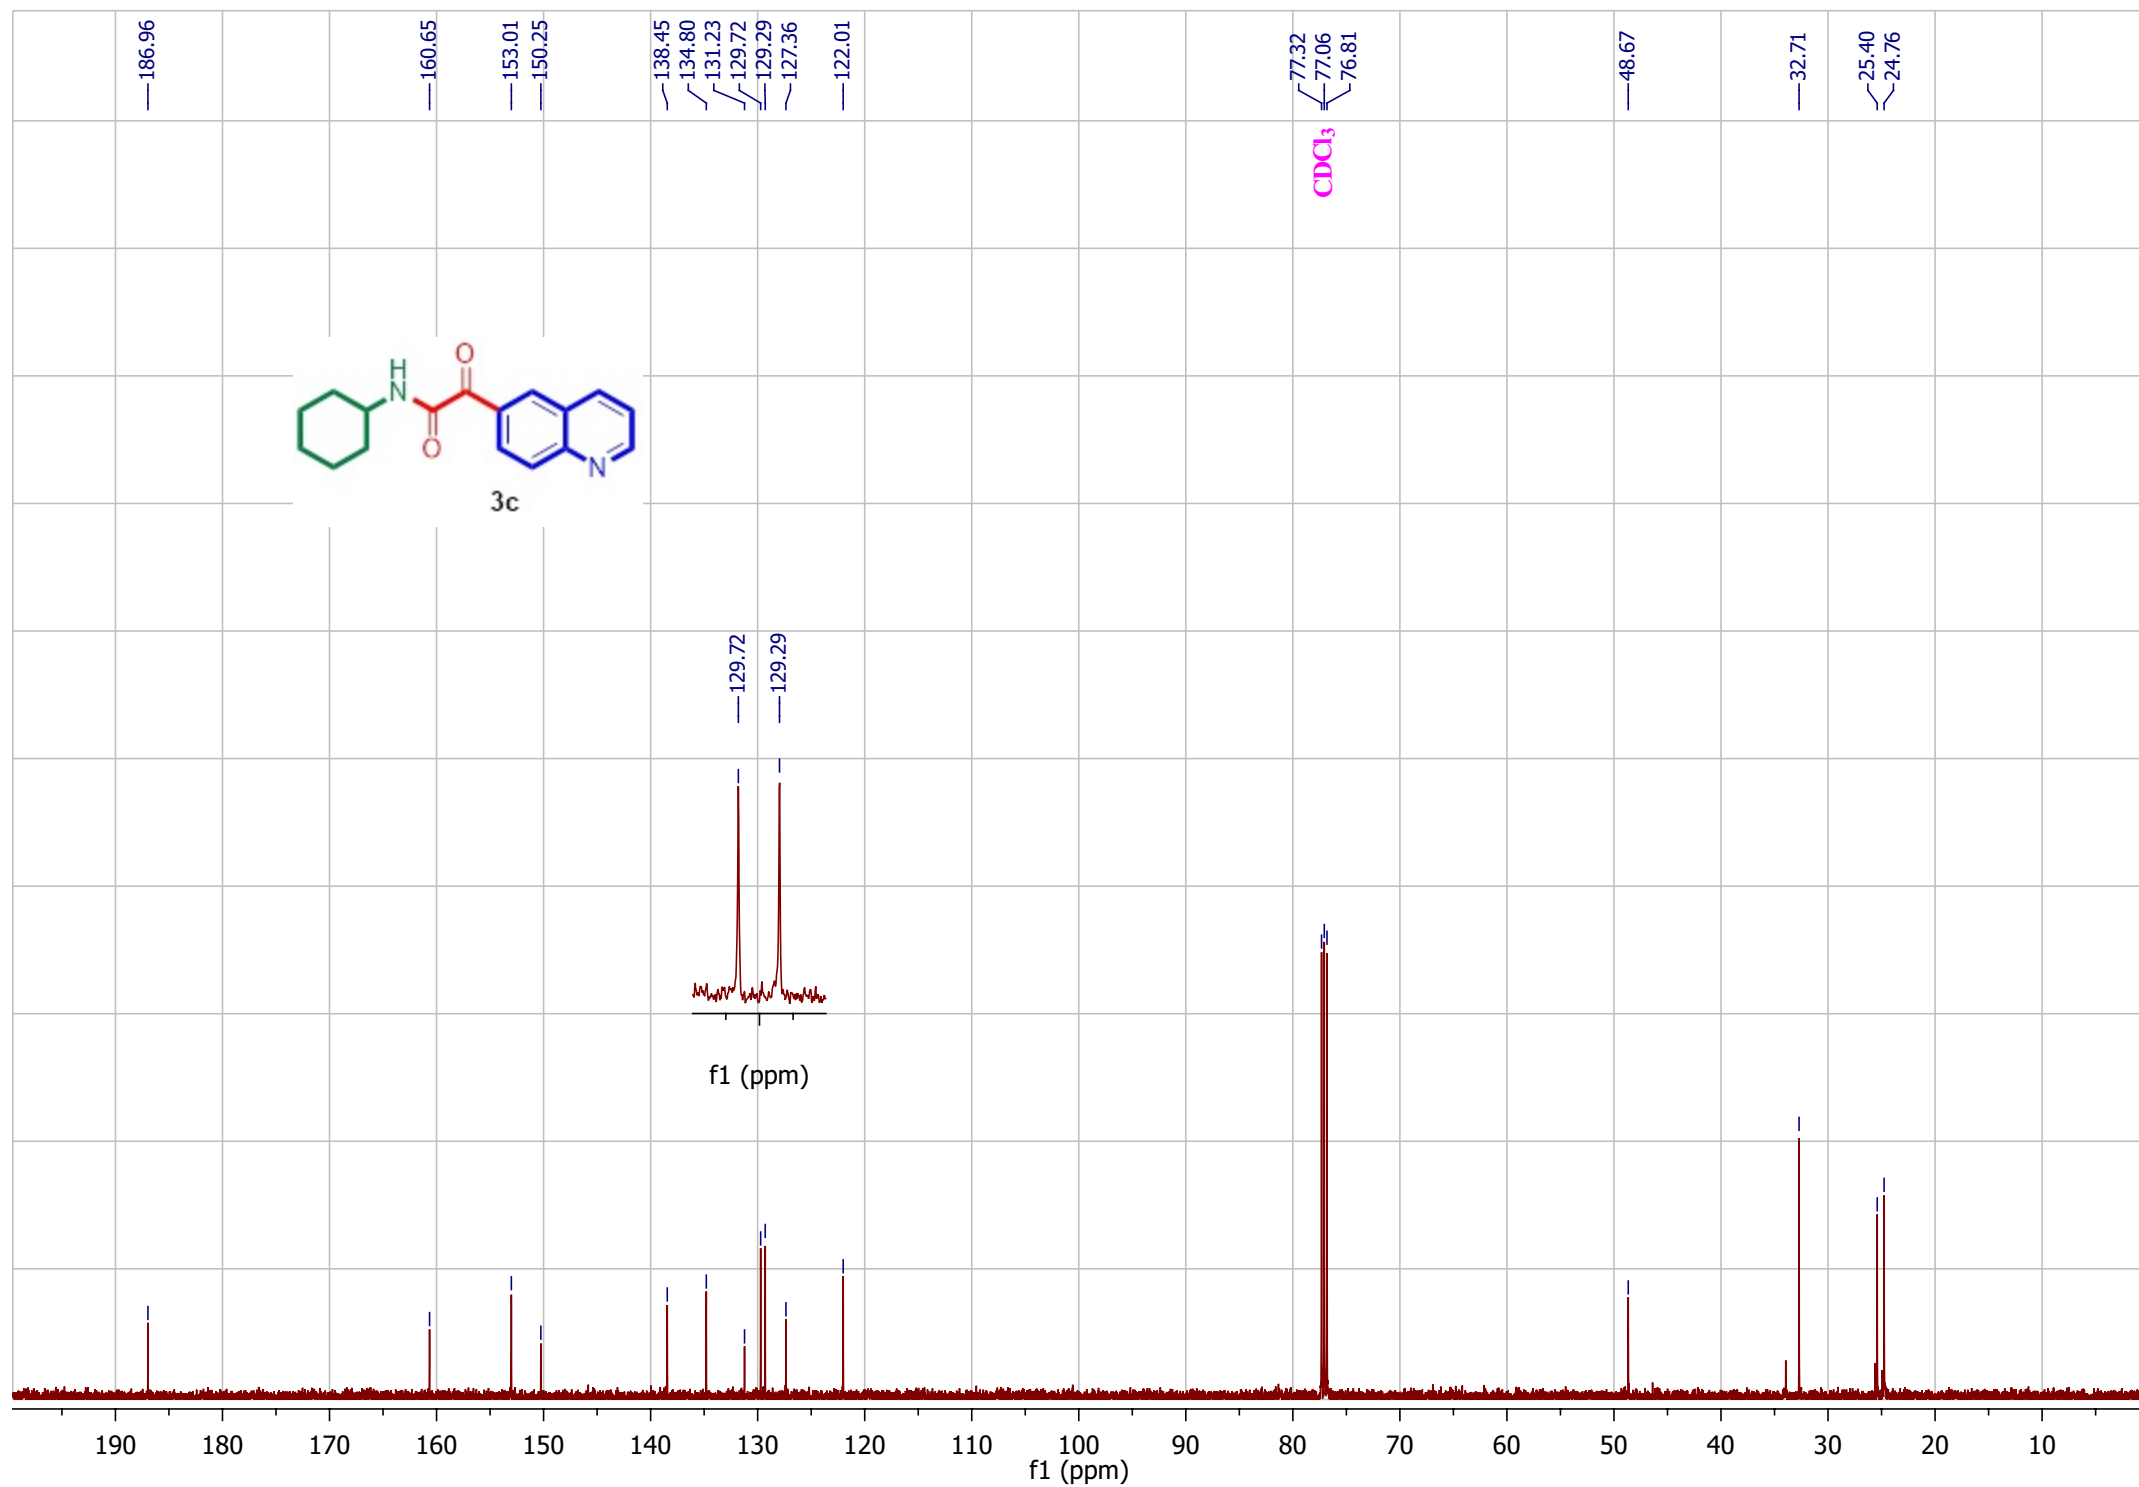

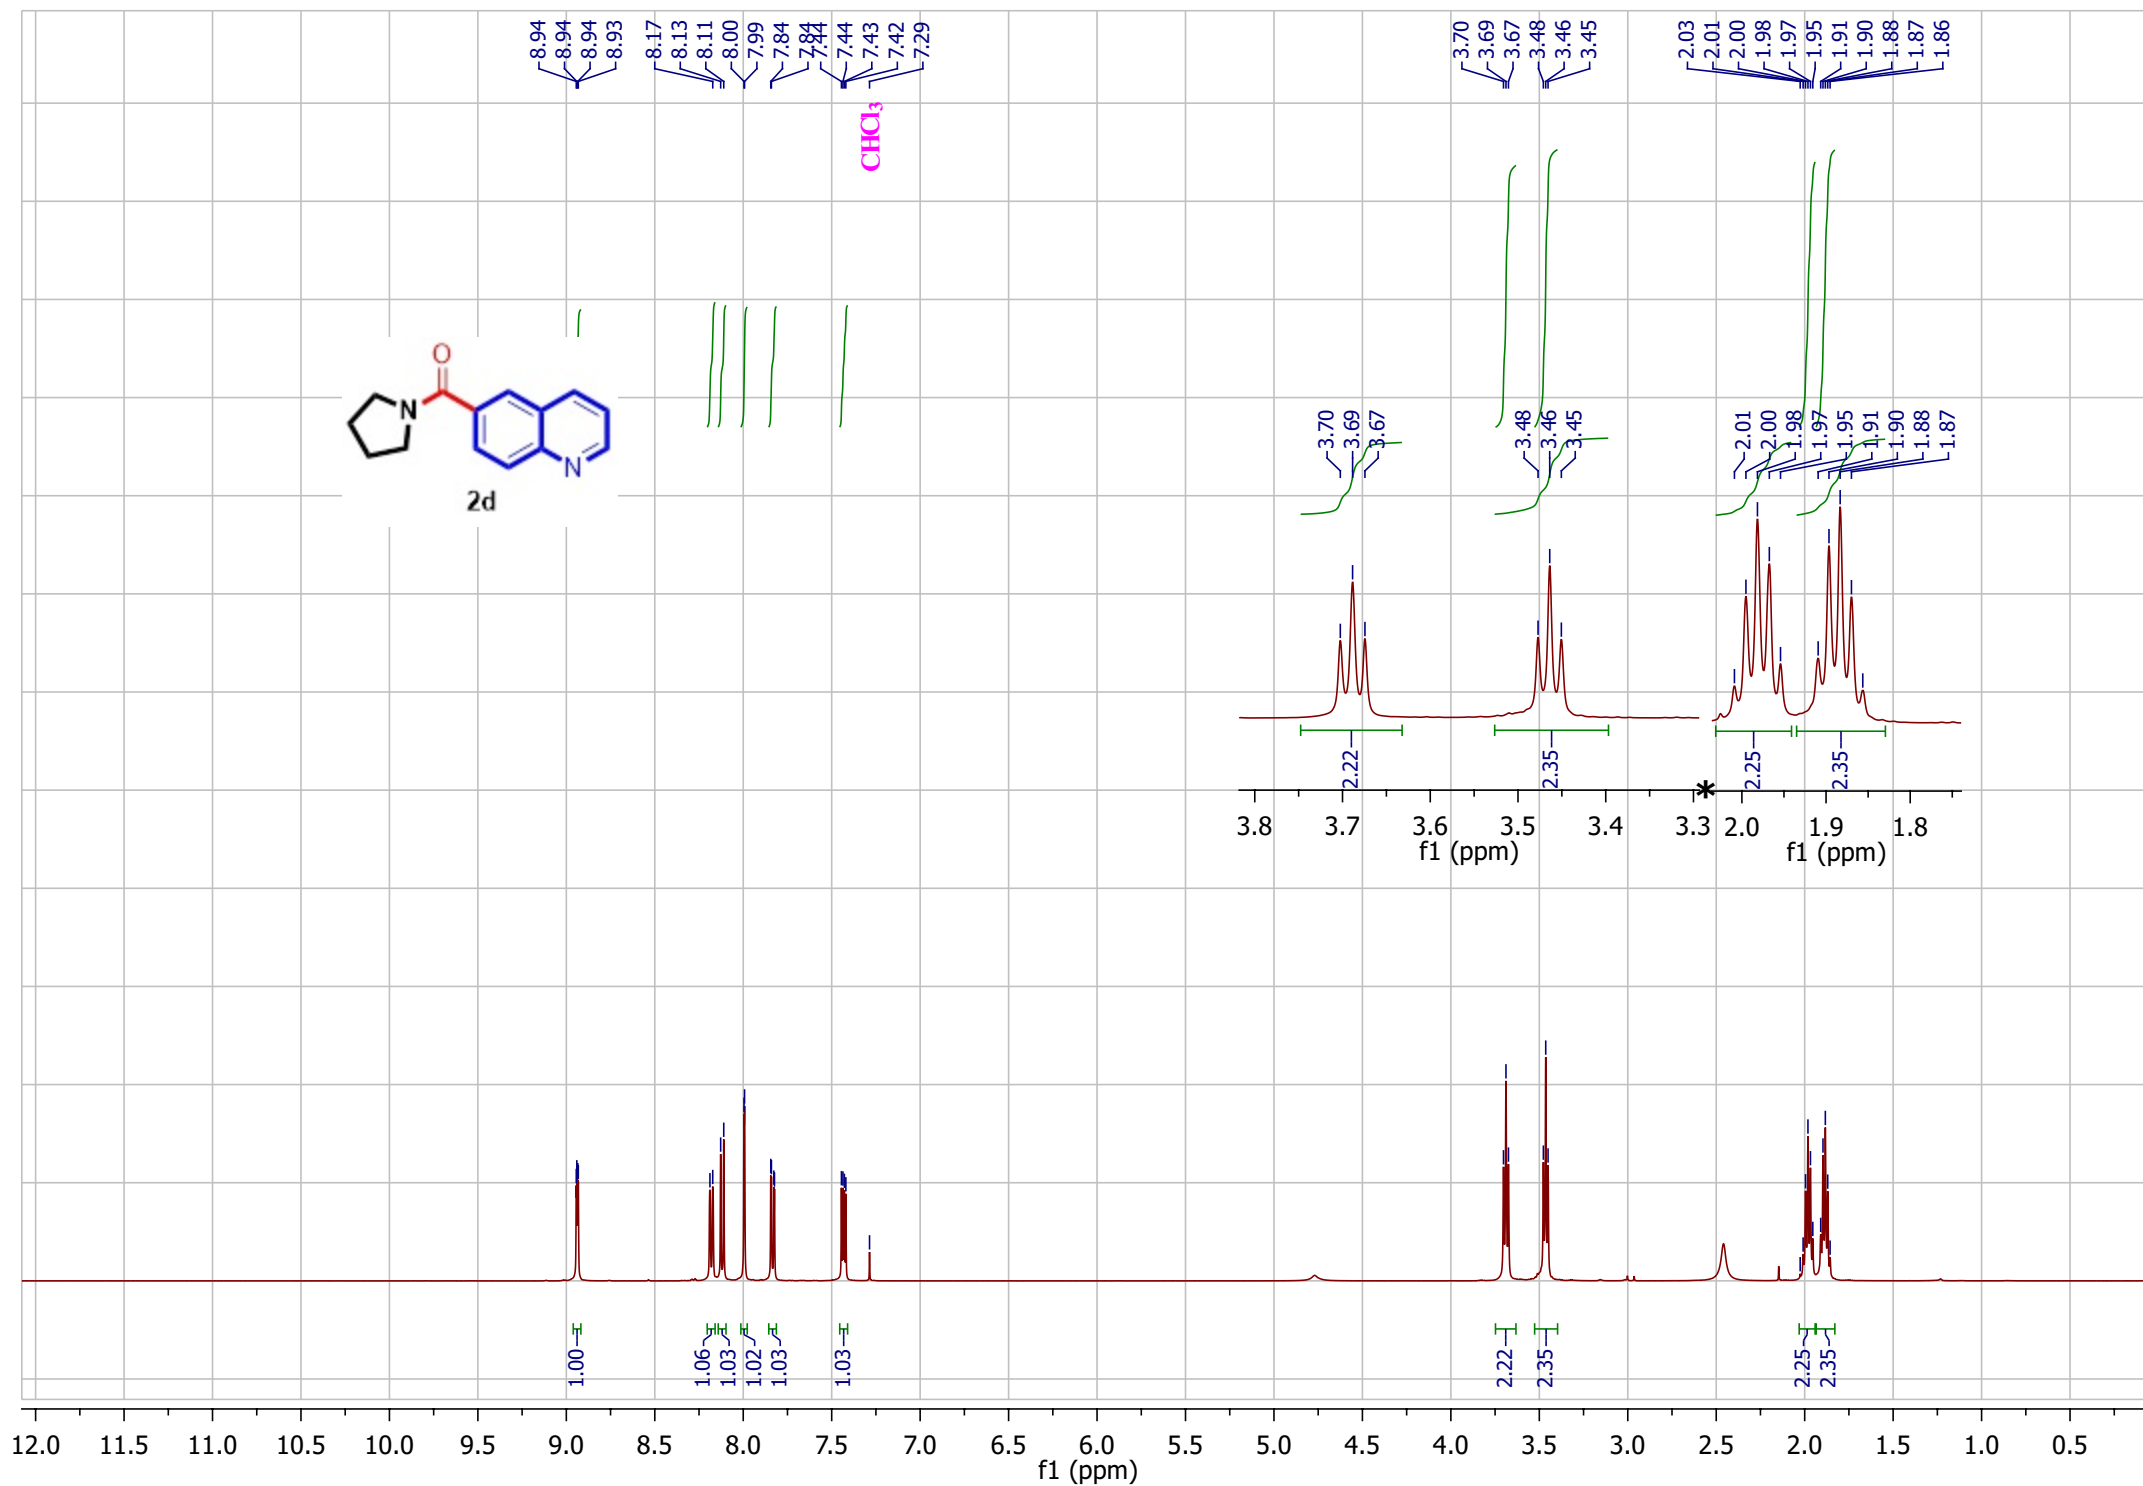



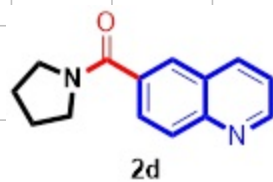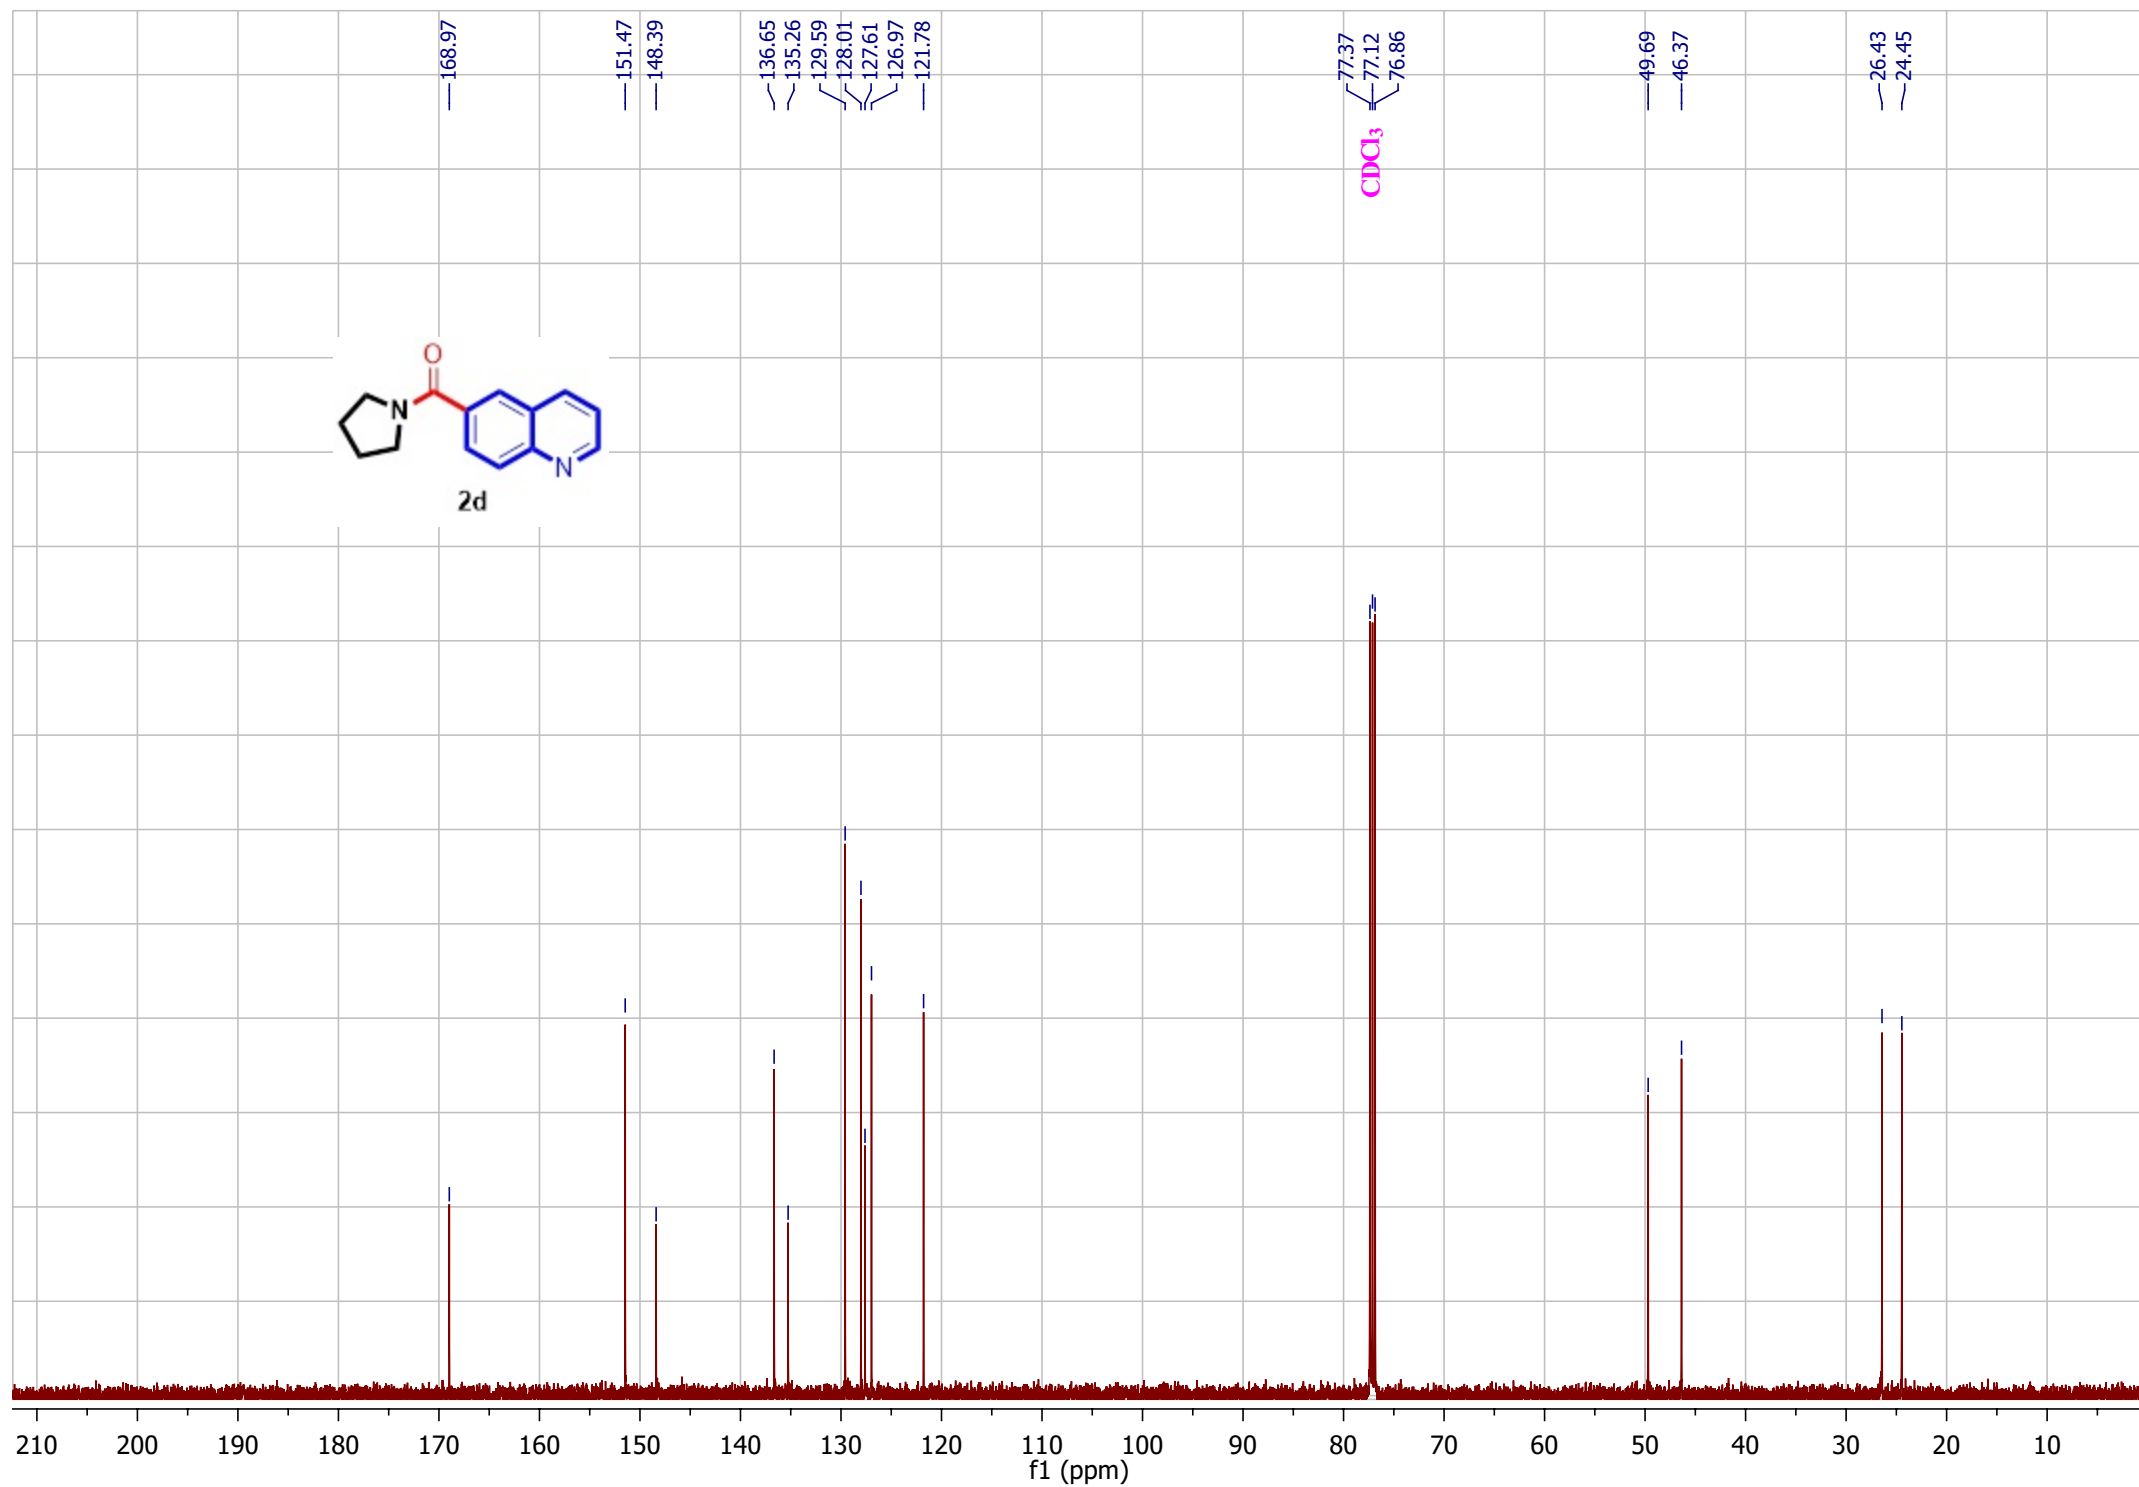

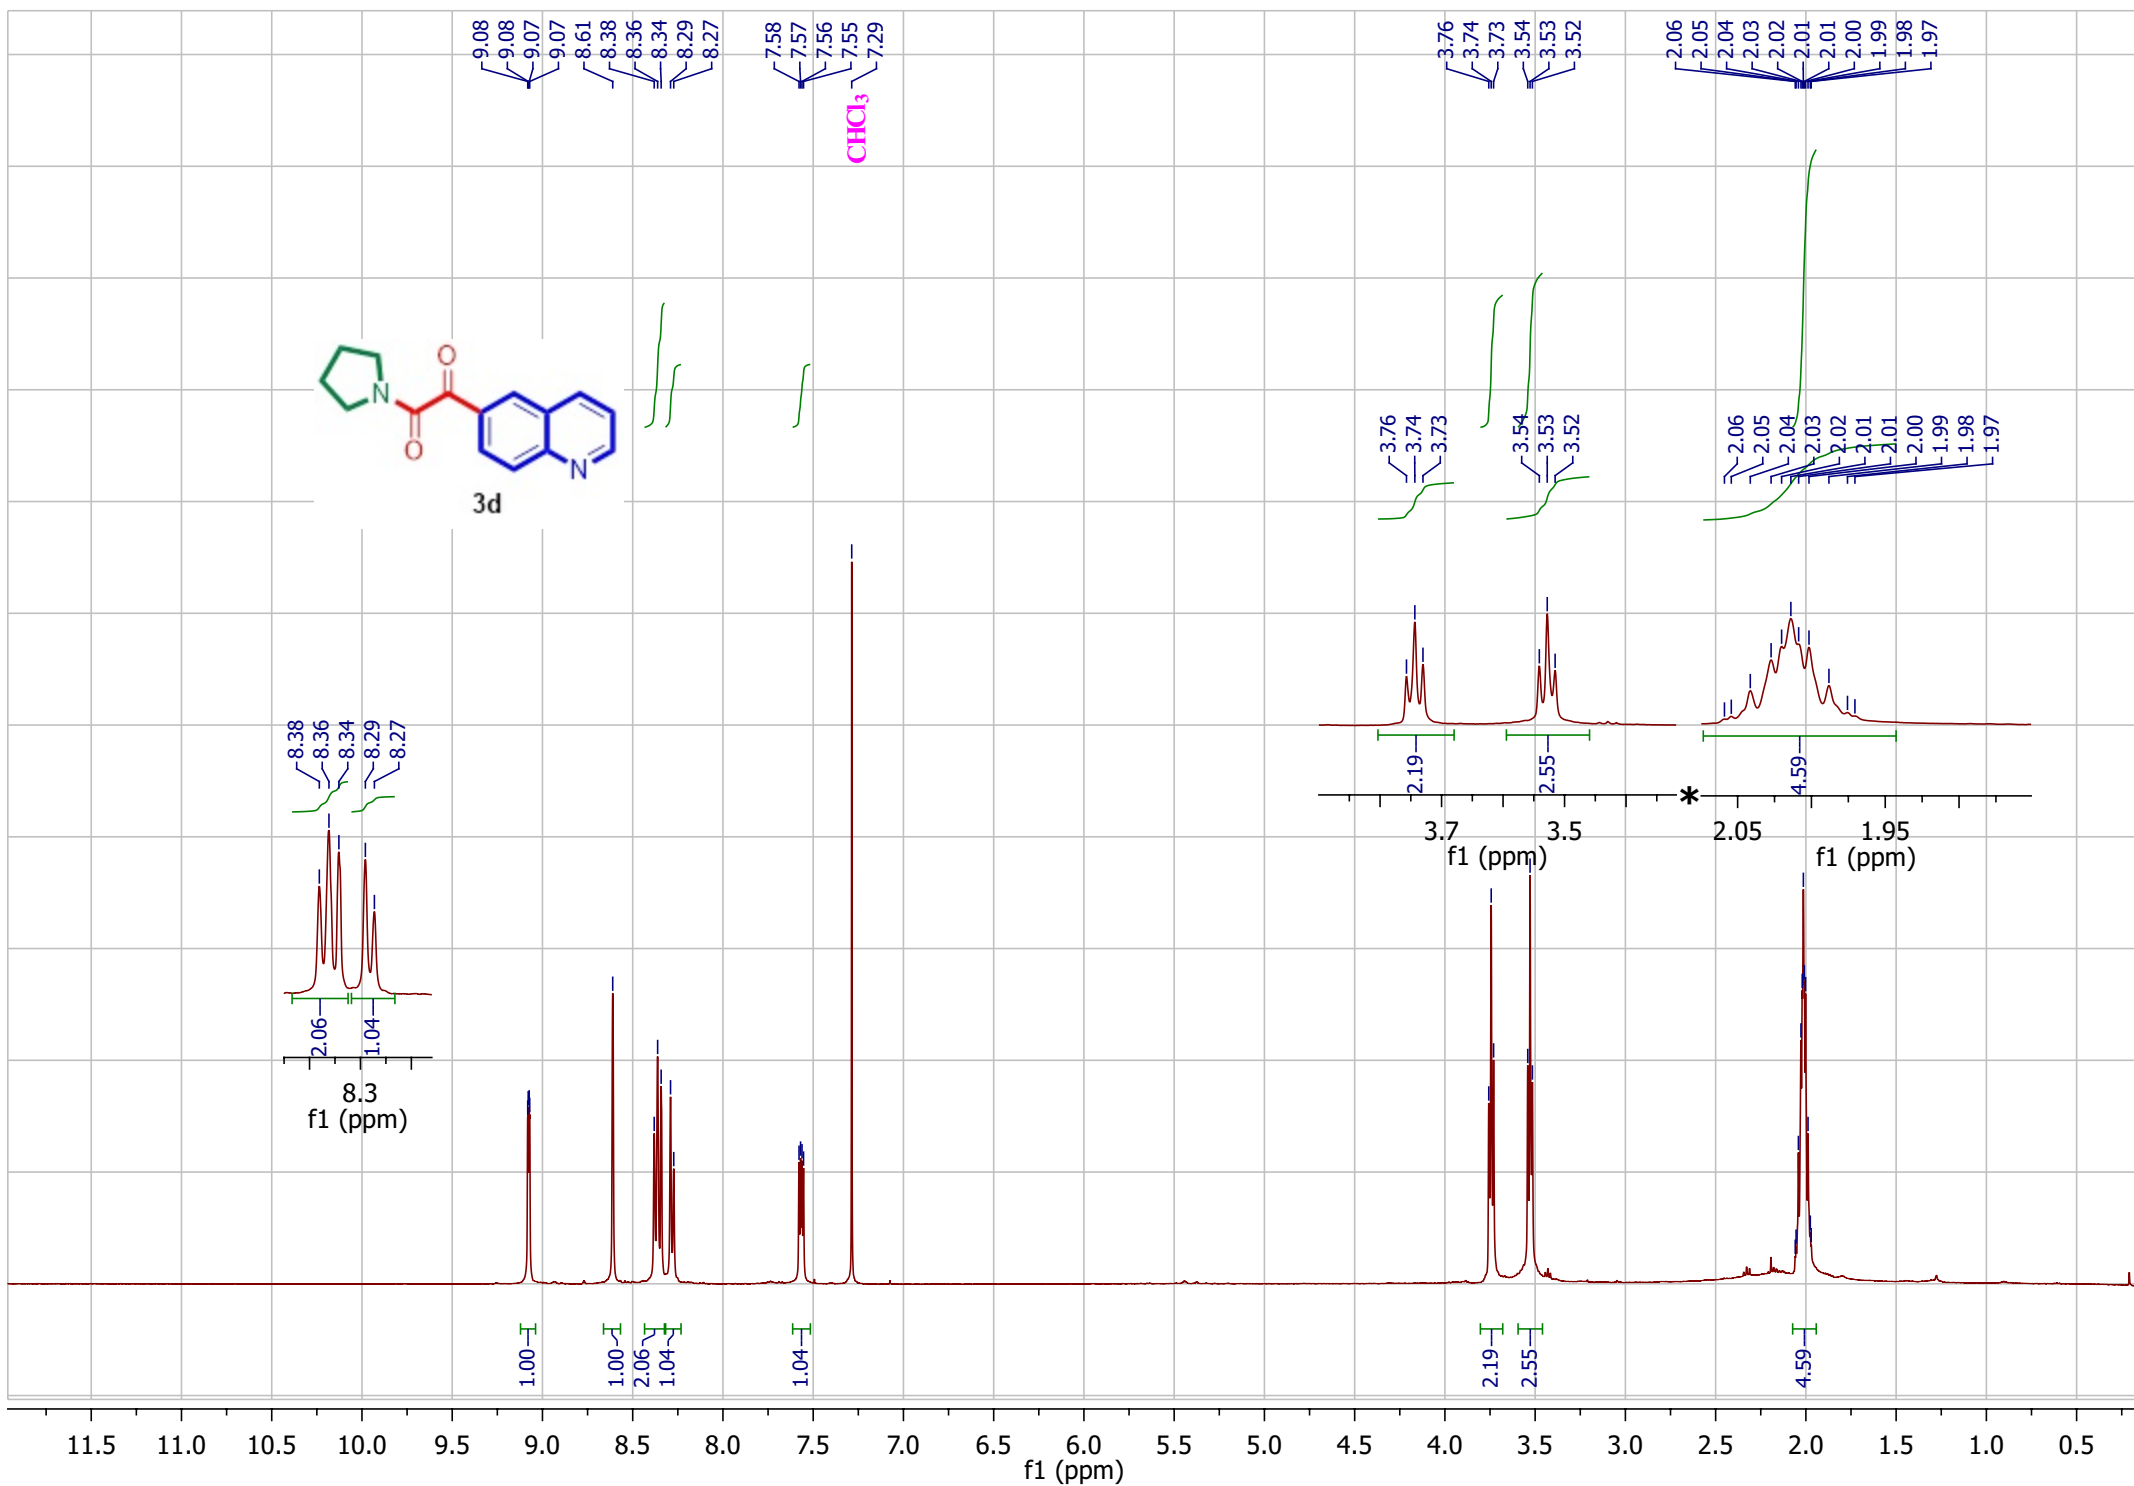

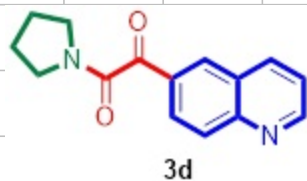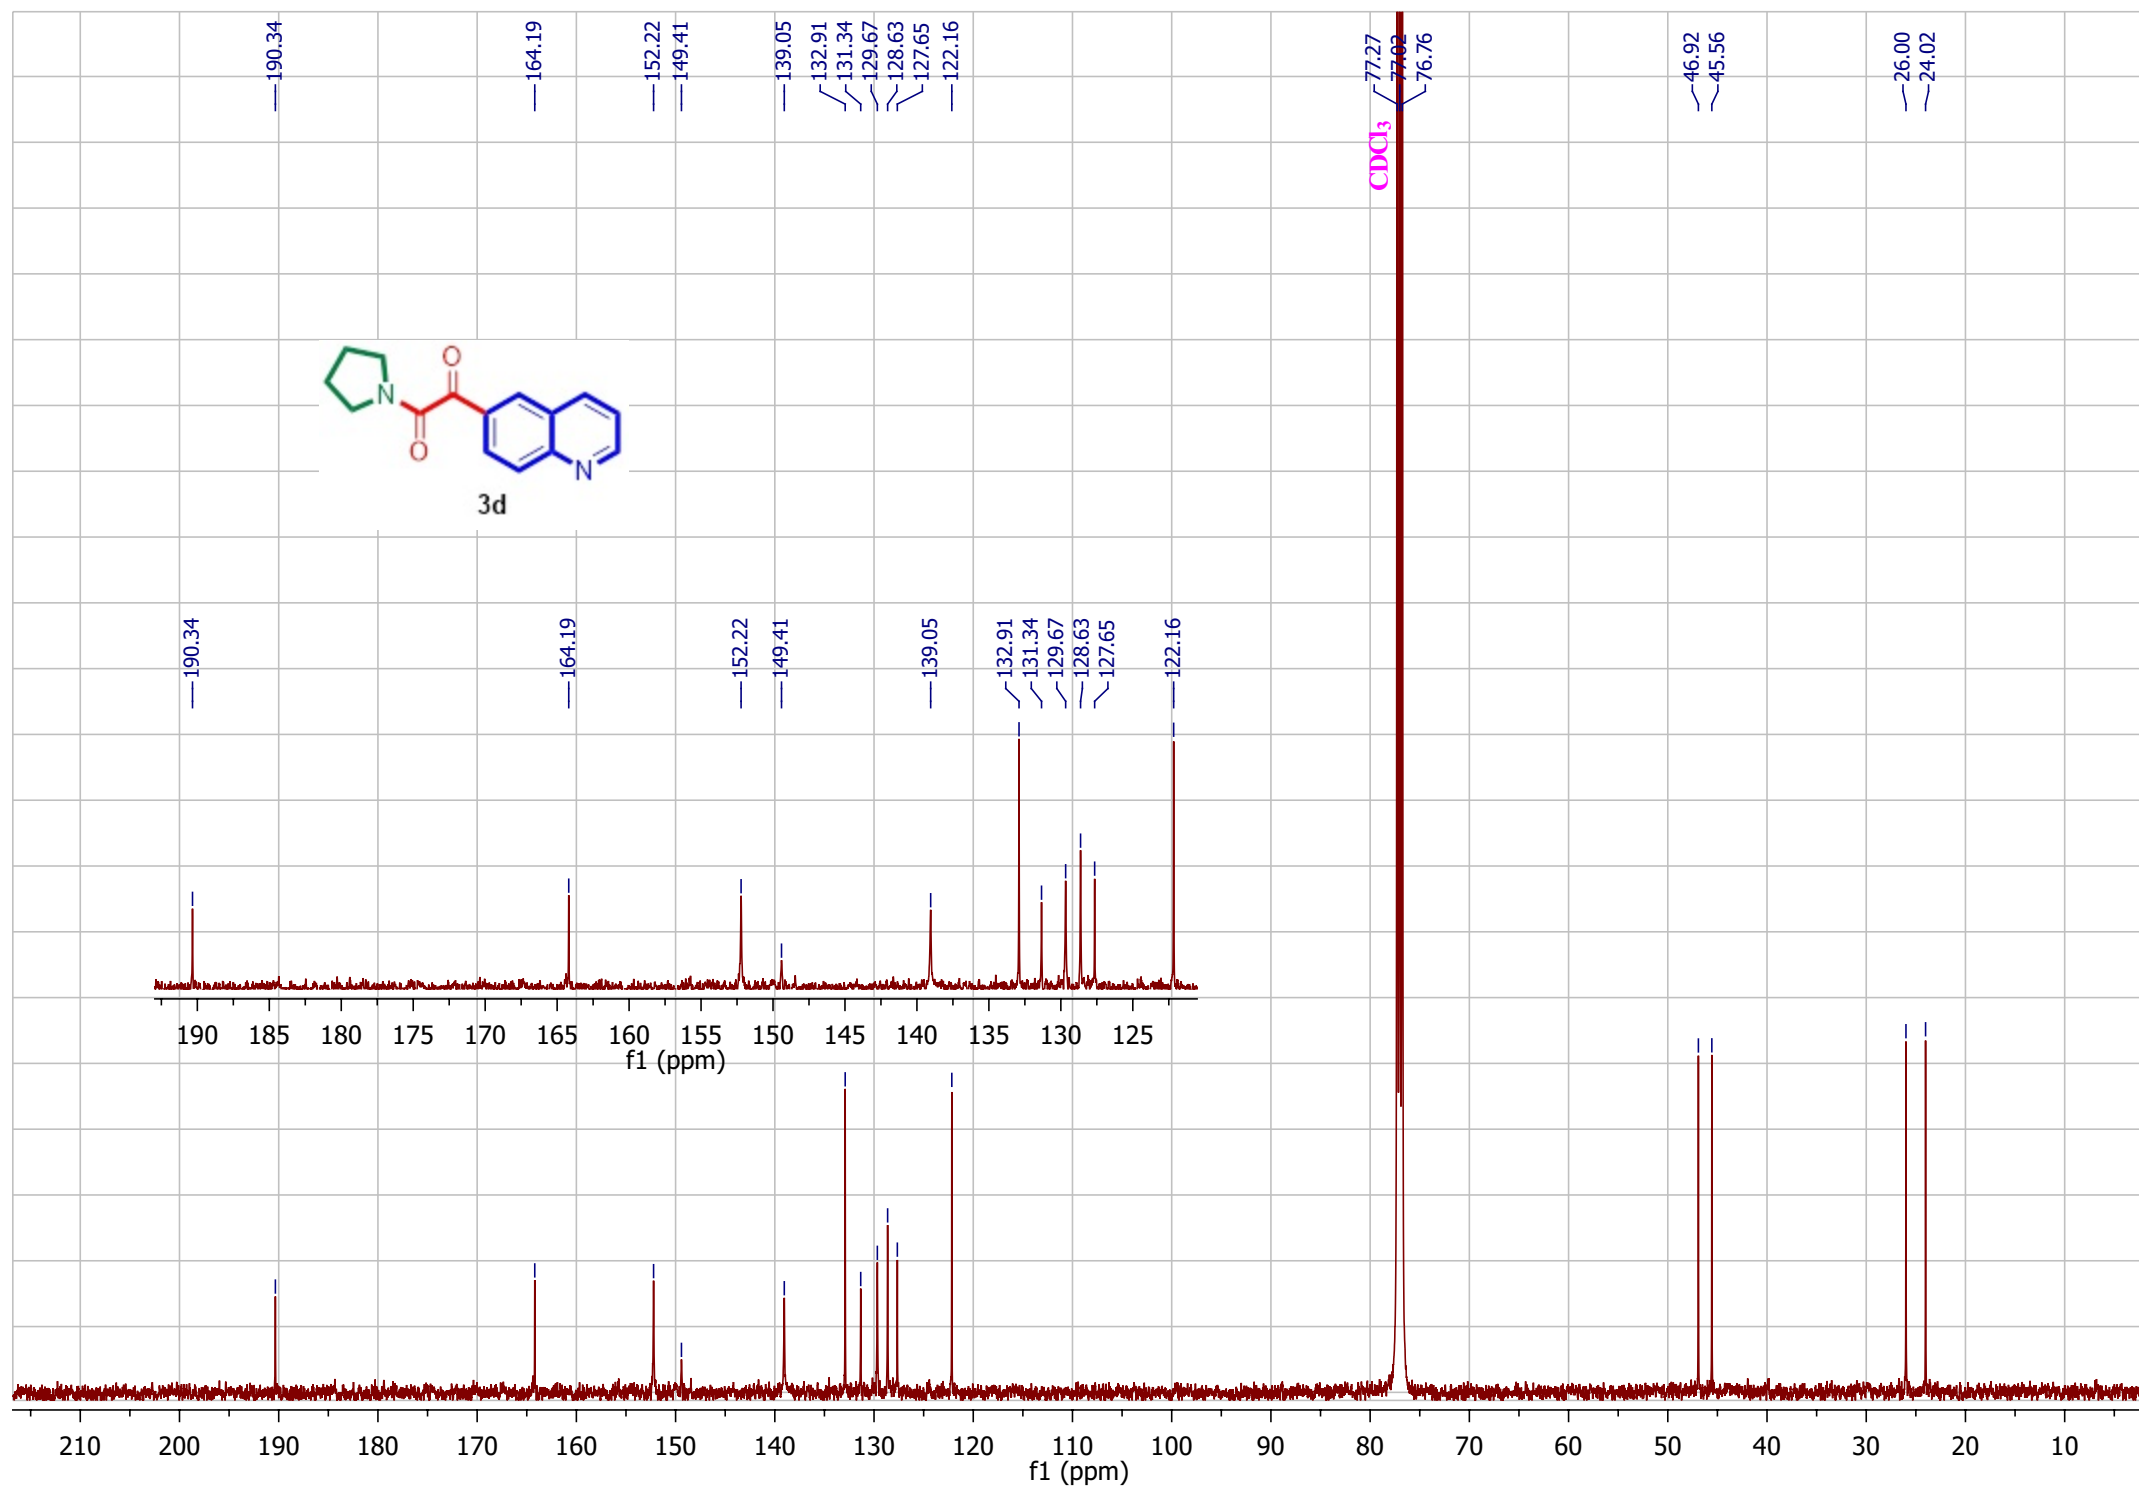

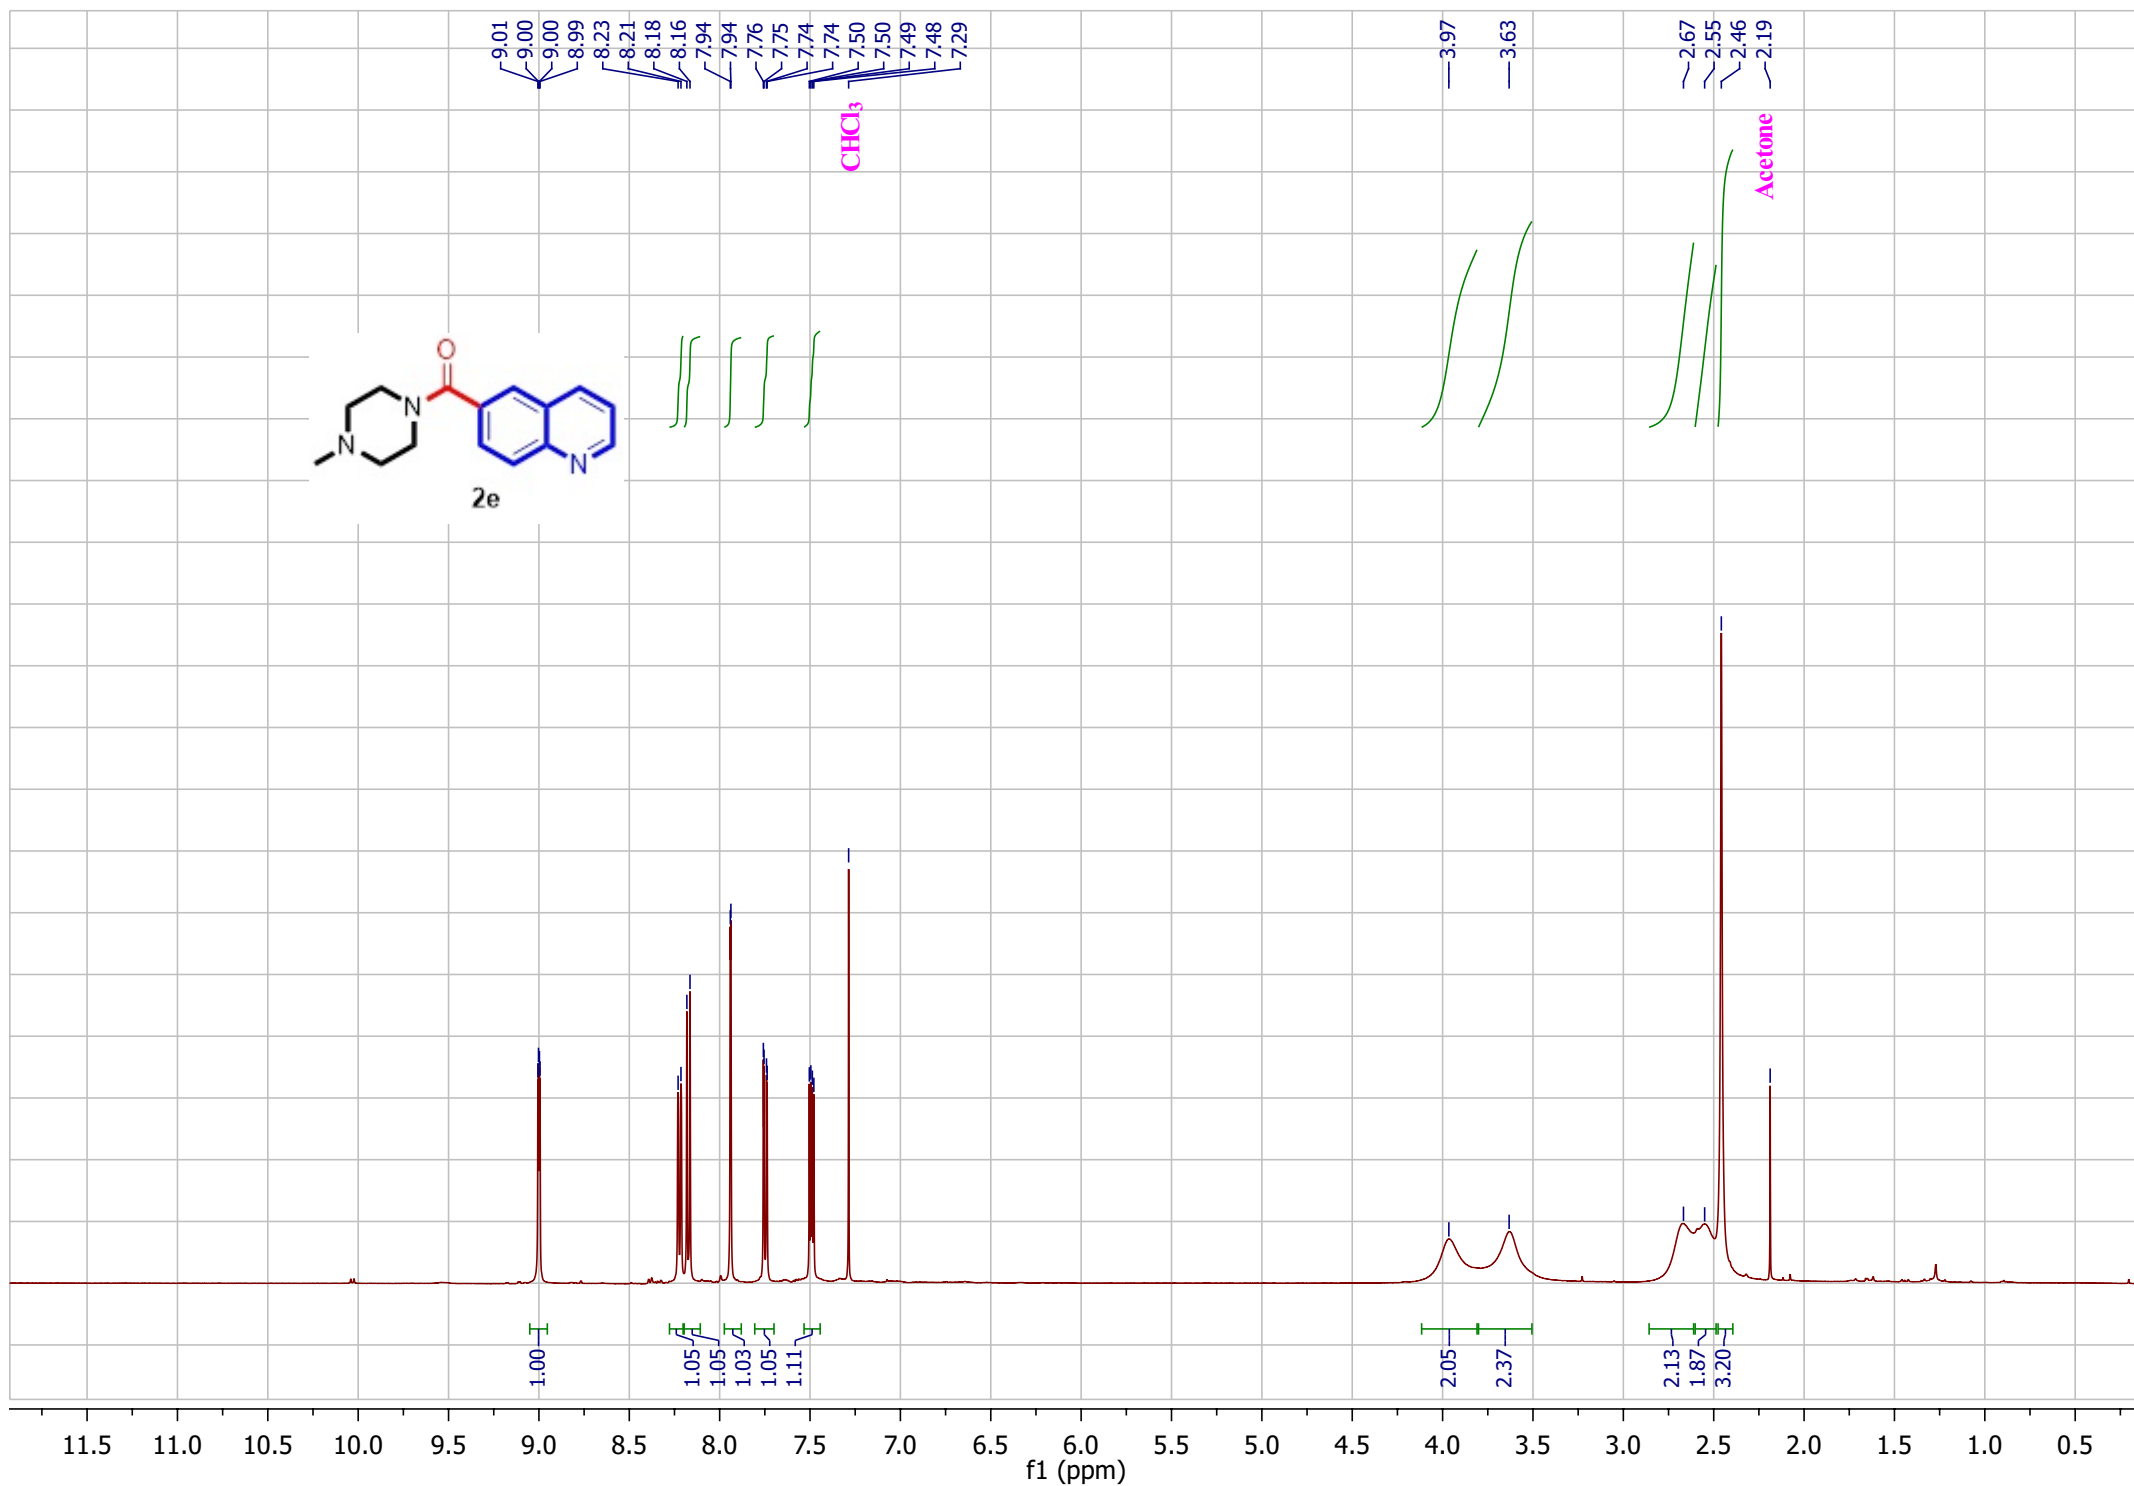

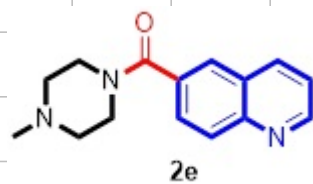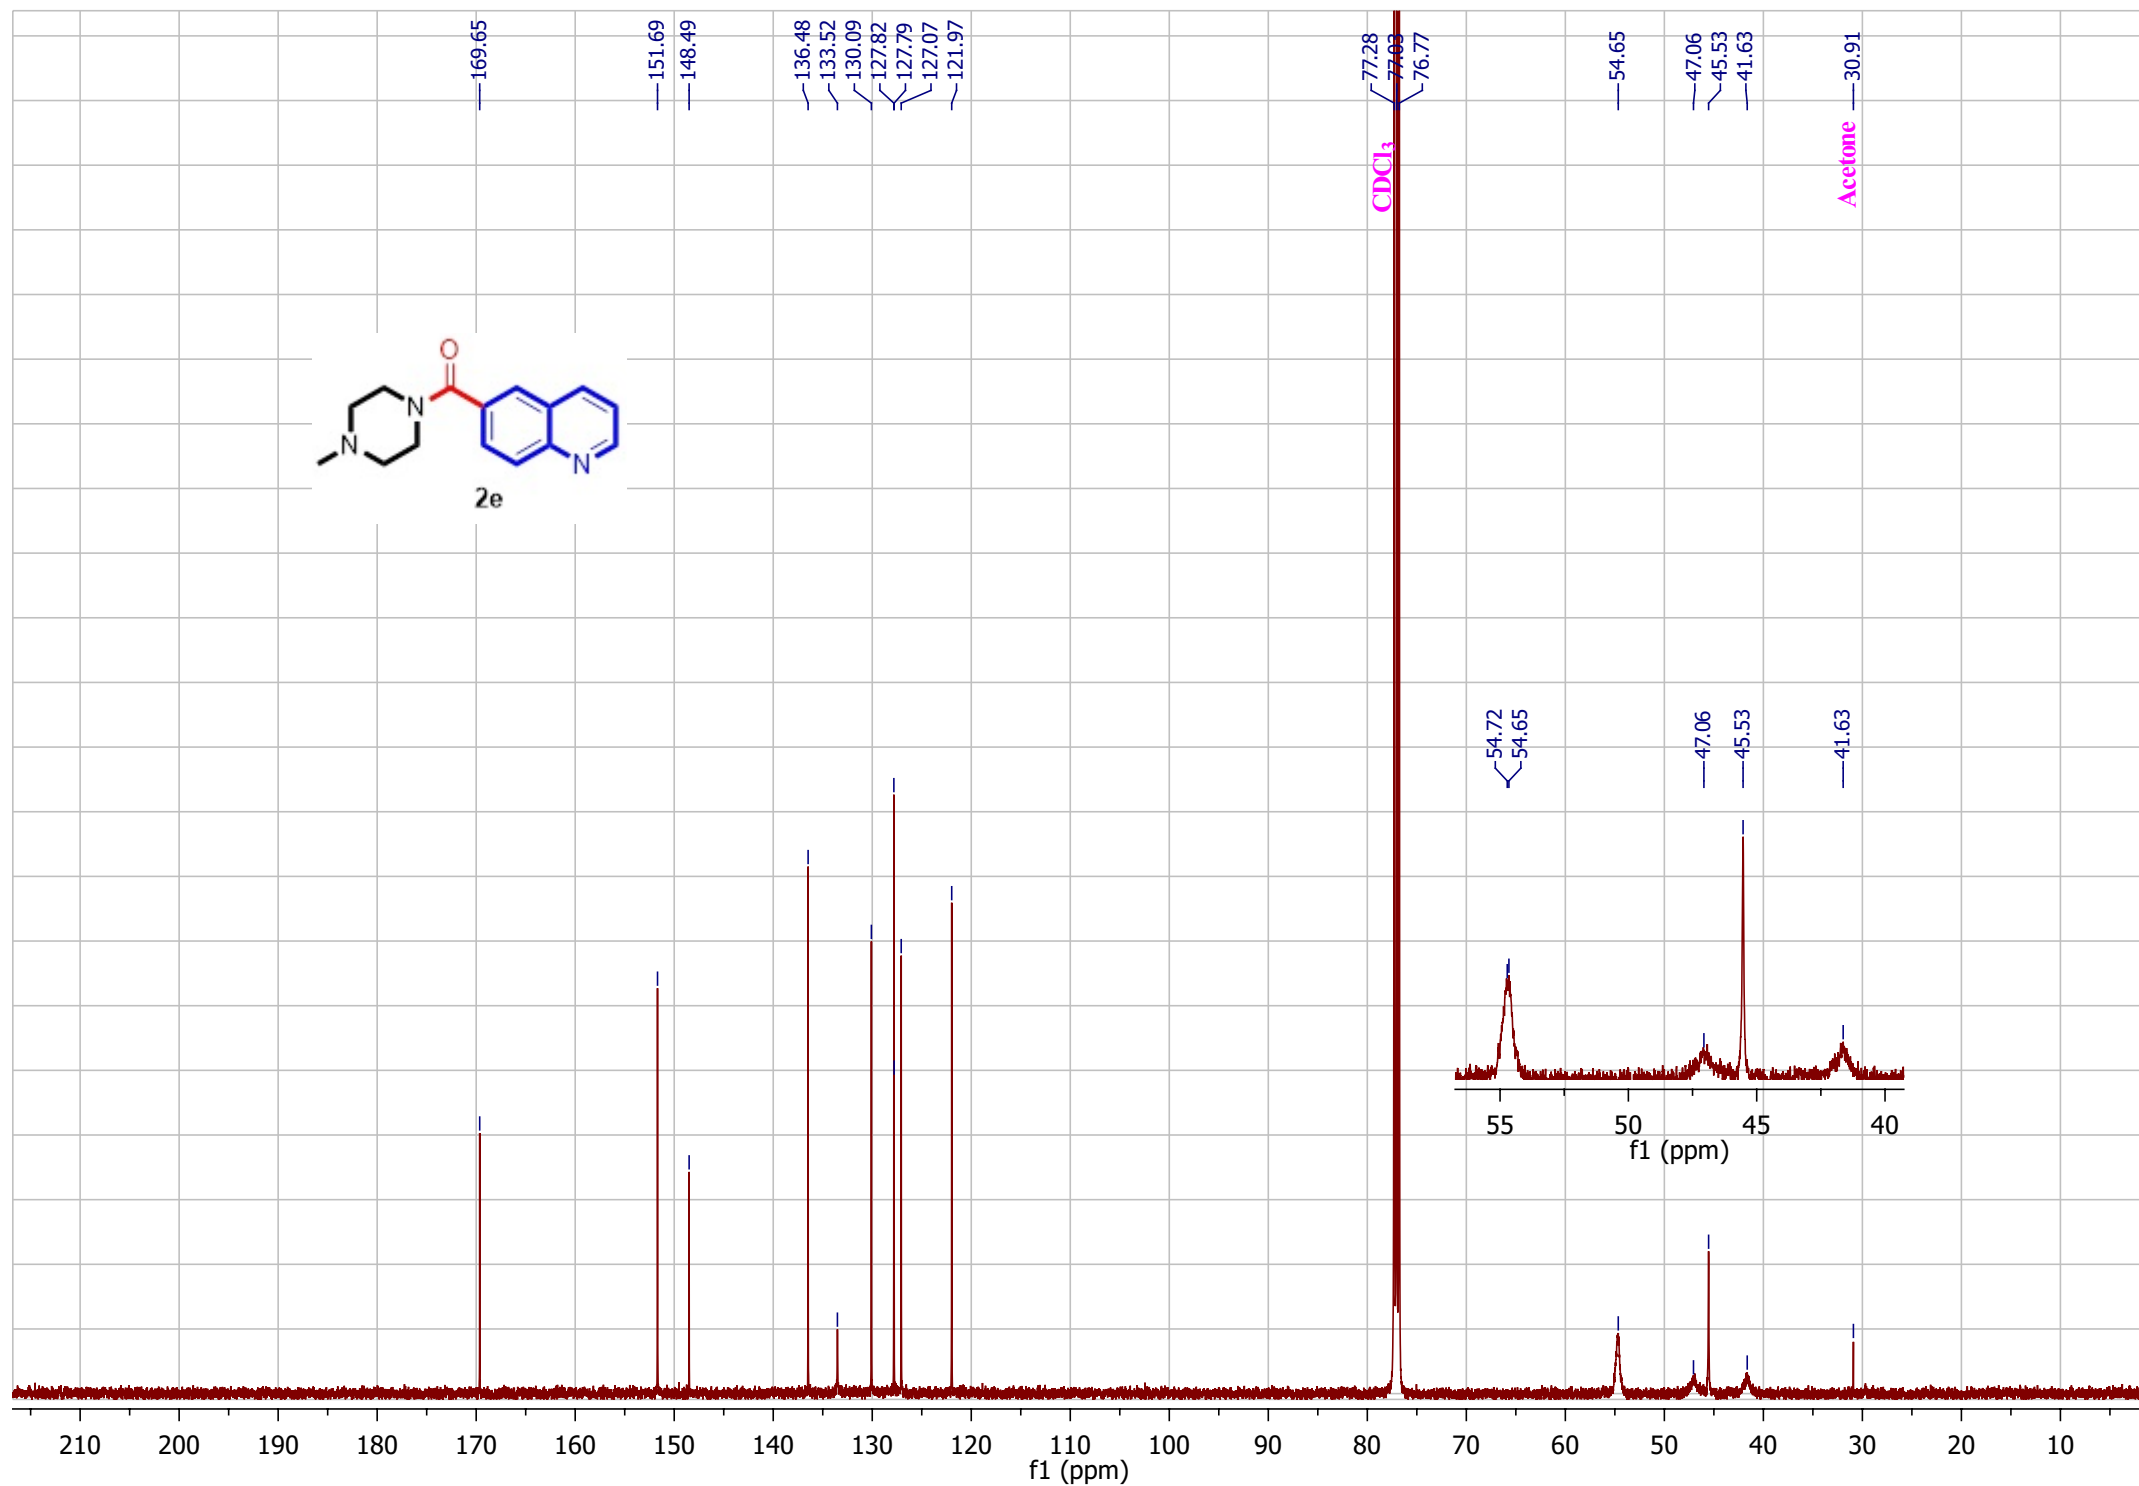

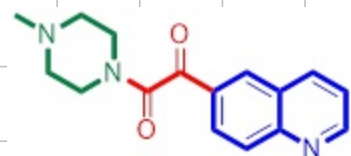

3e

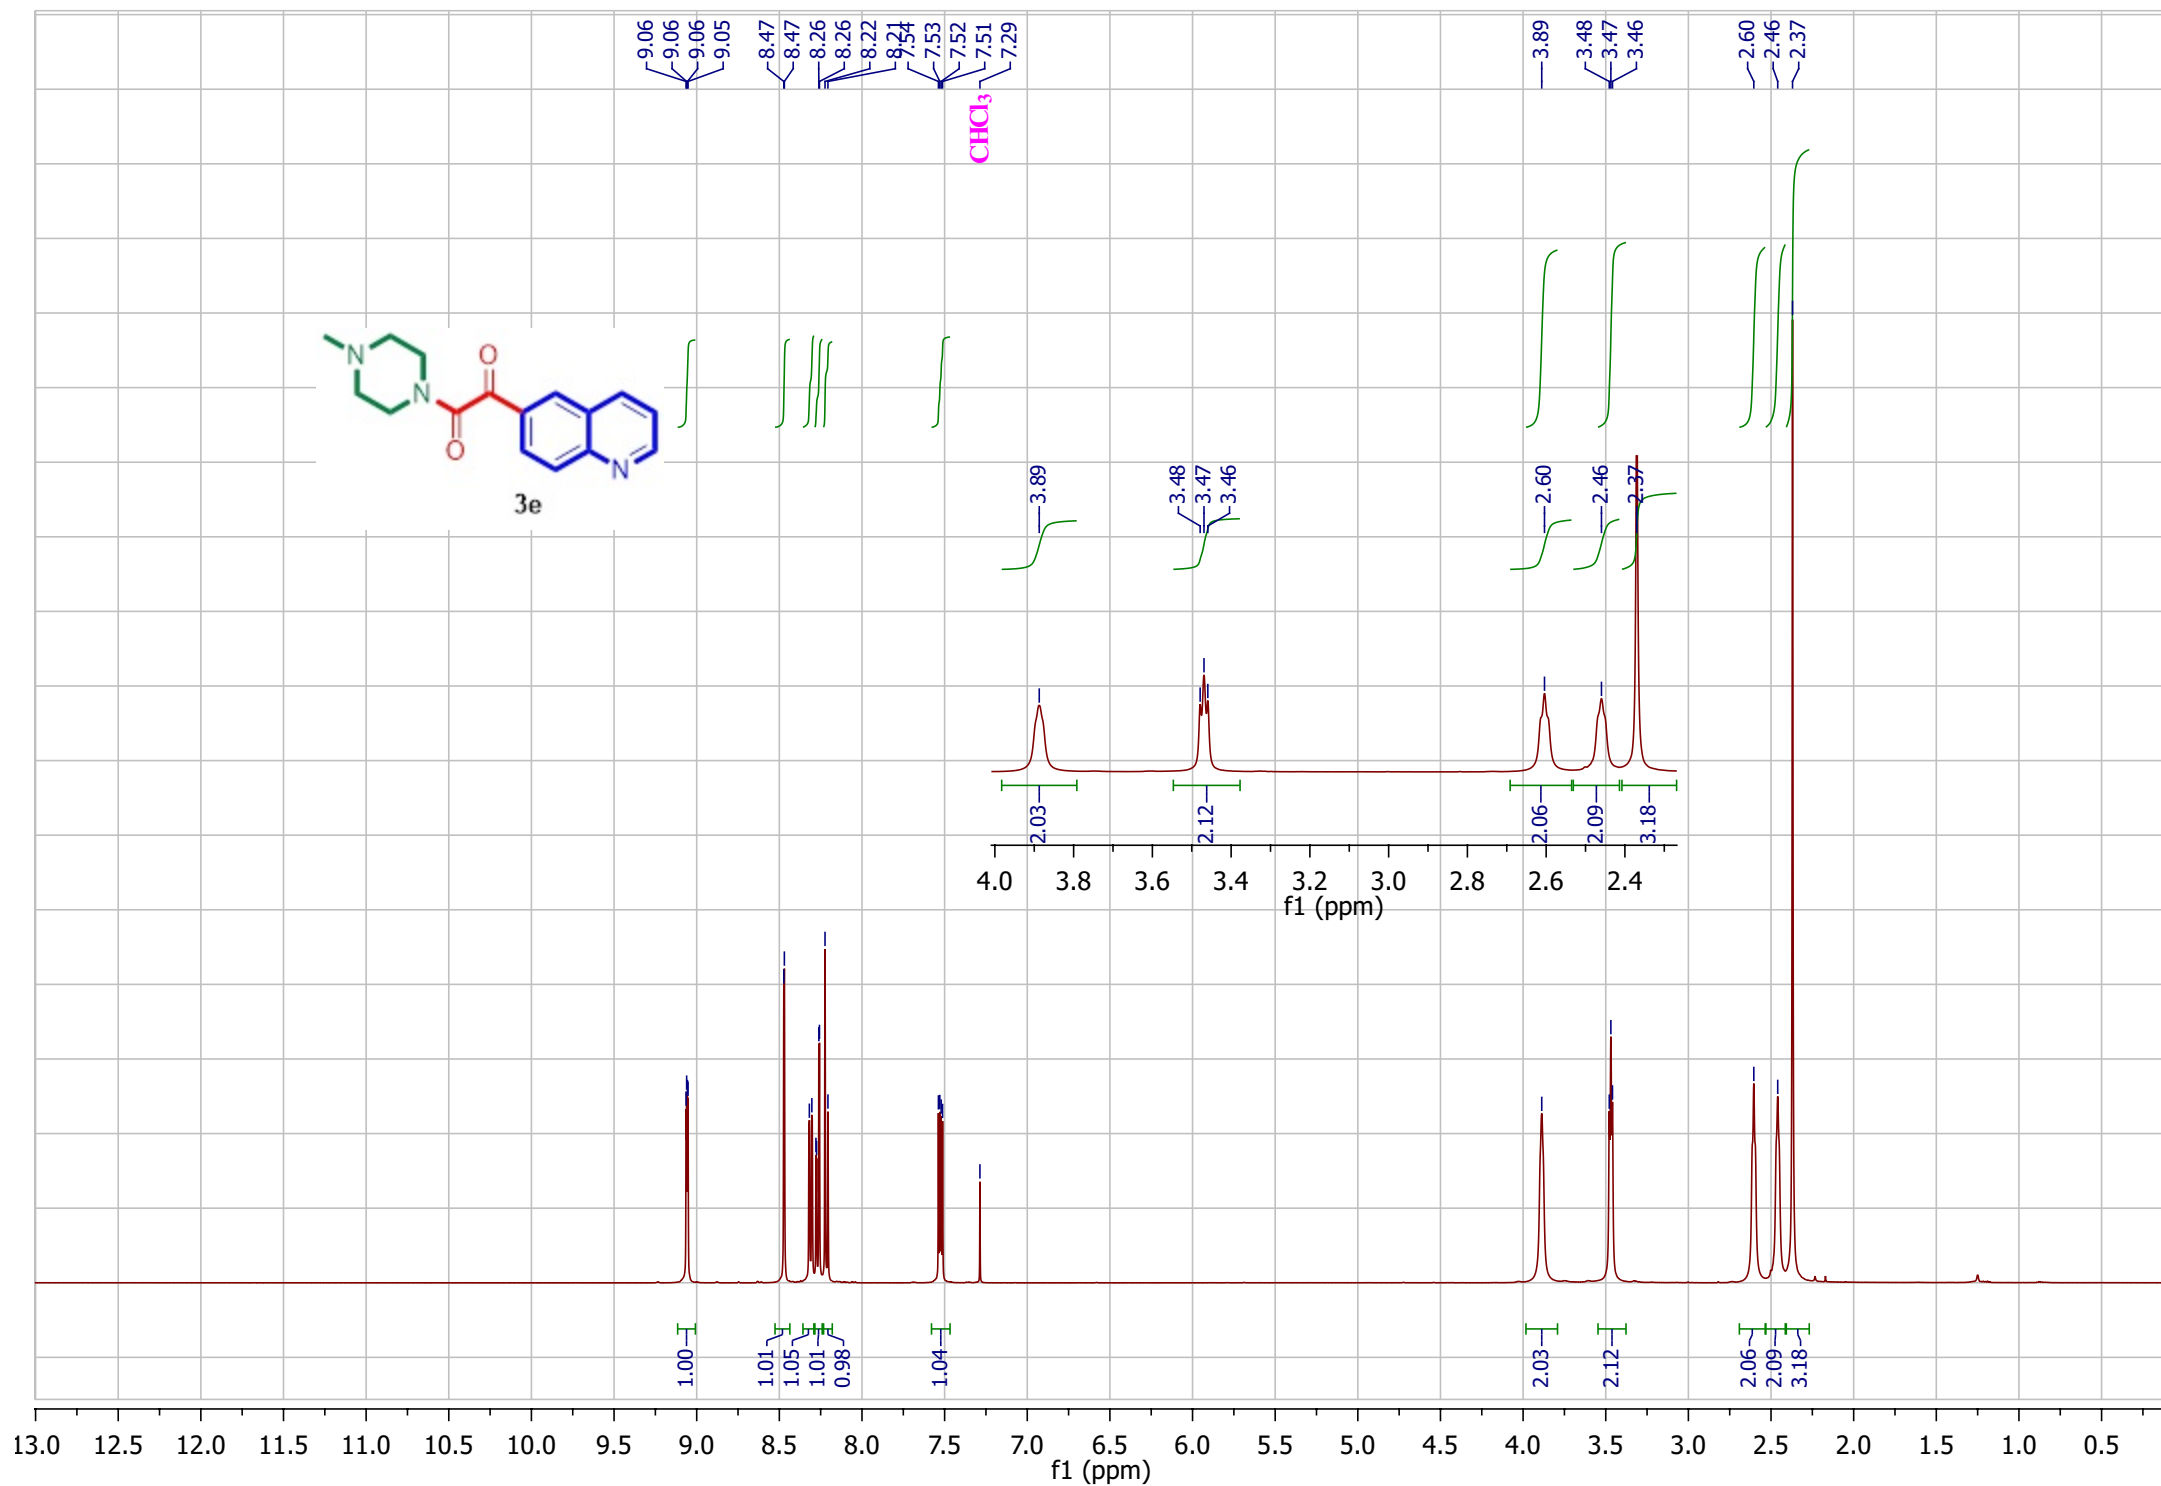

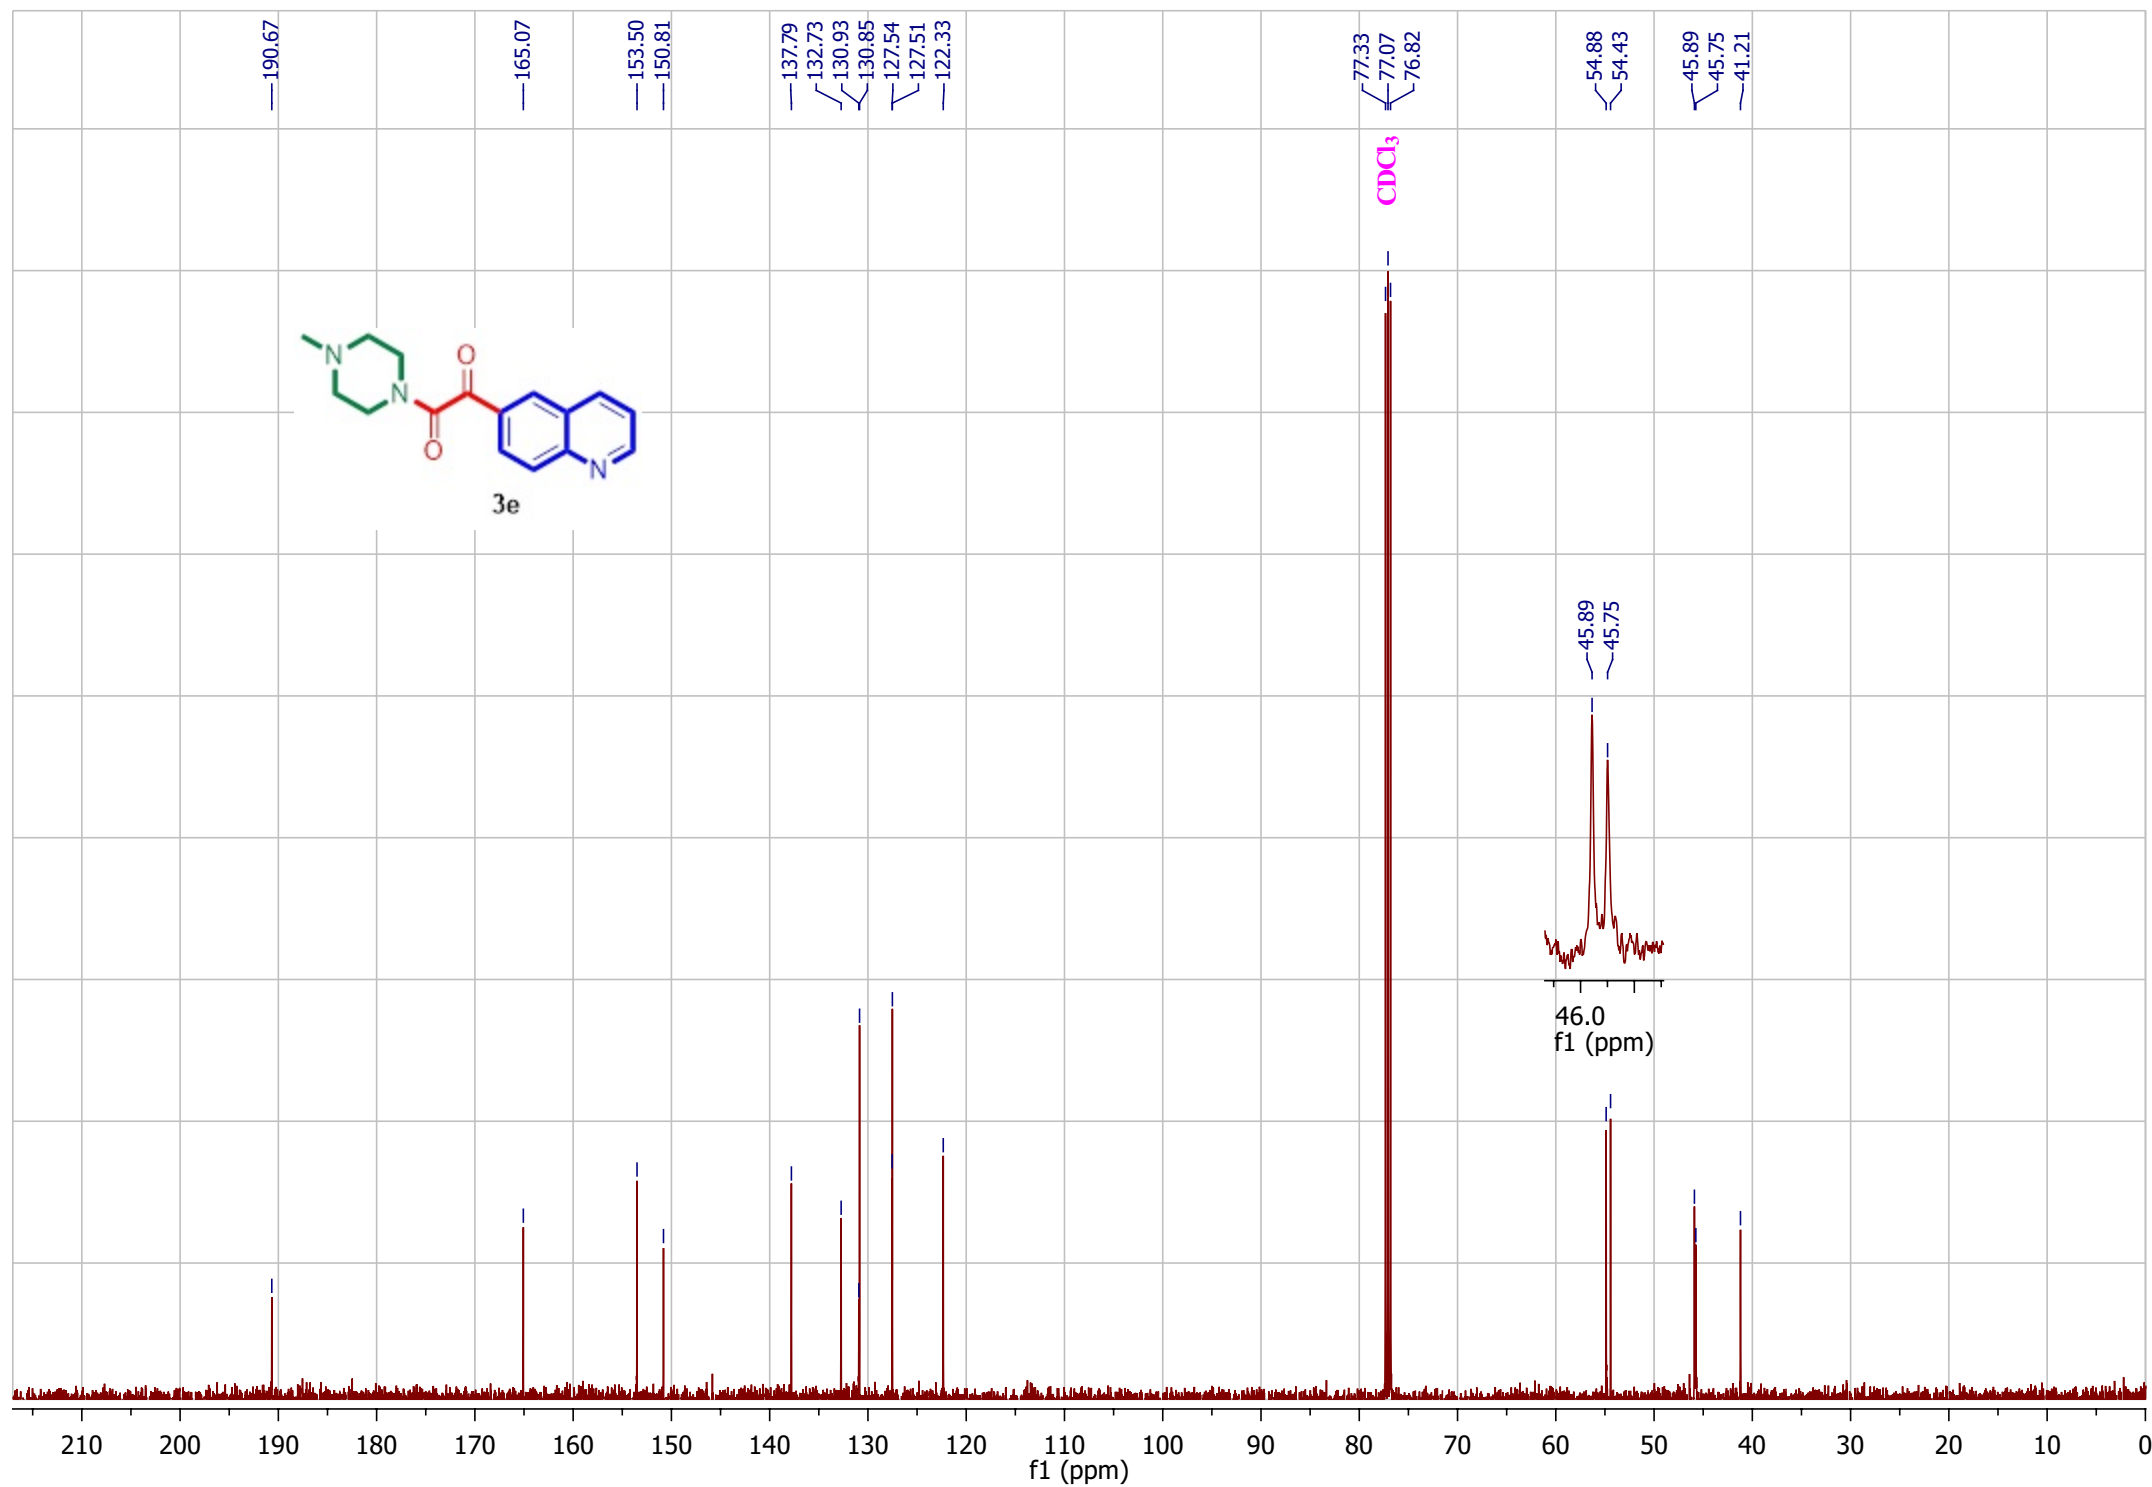

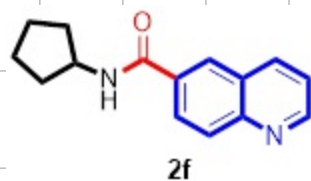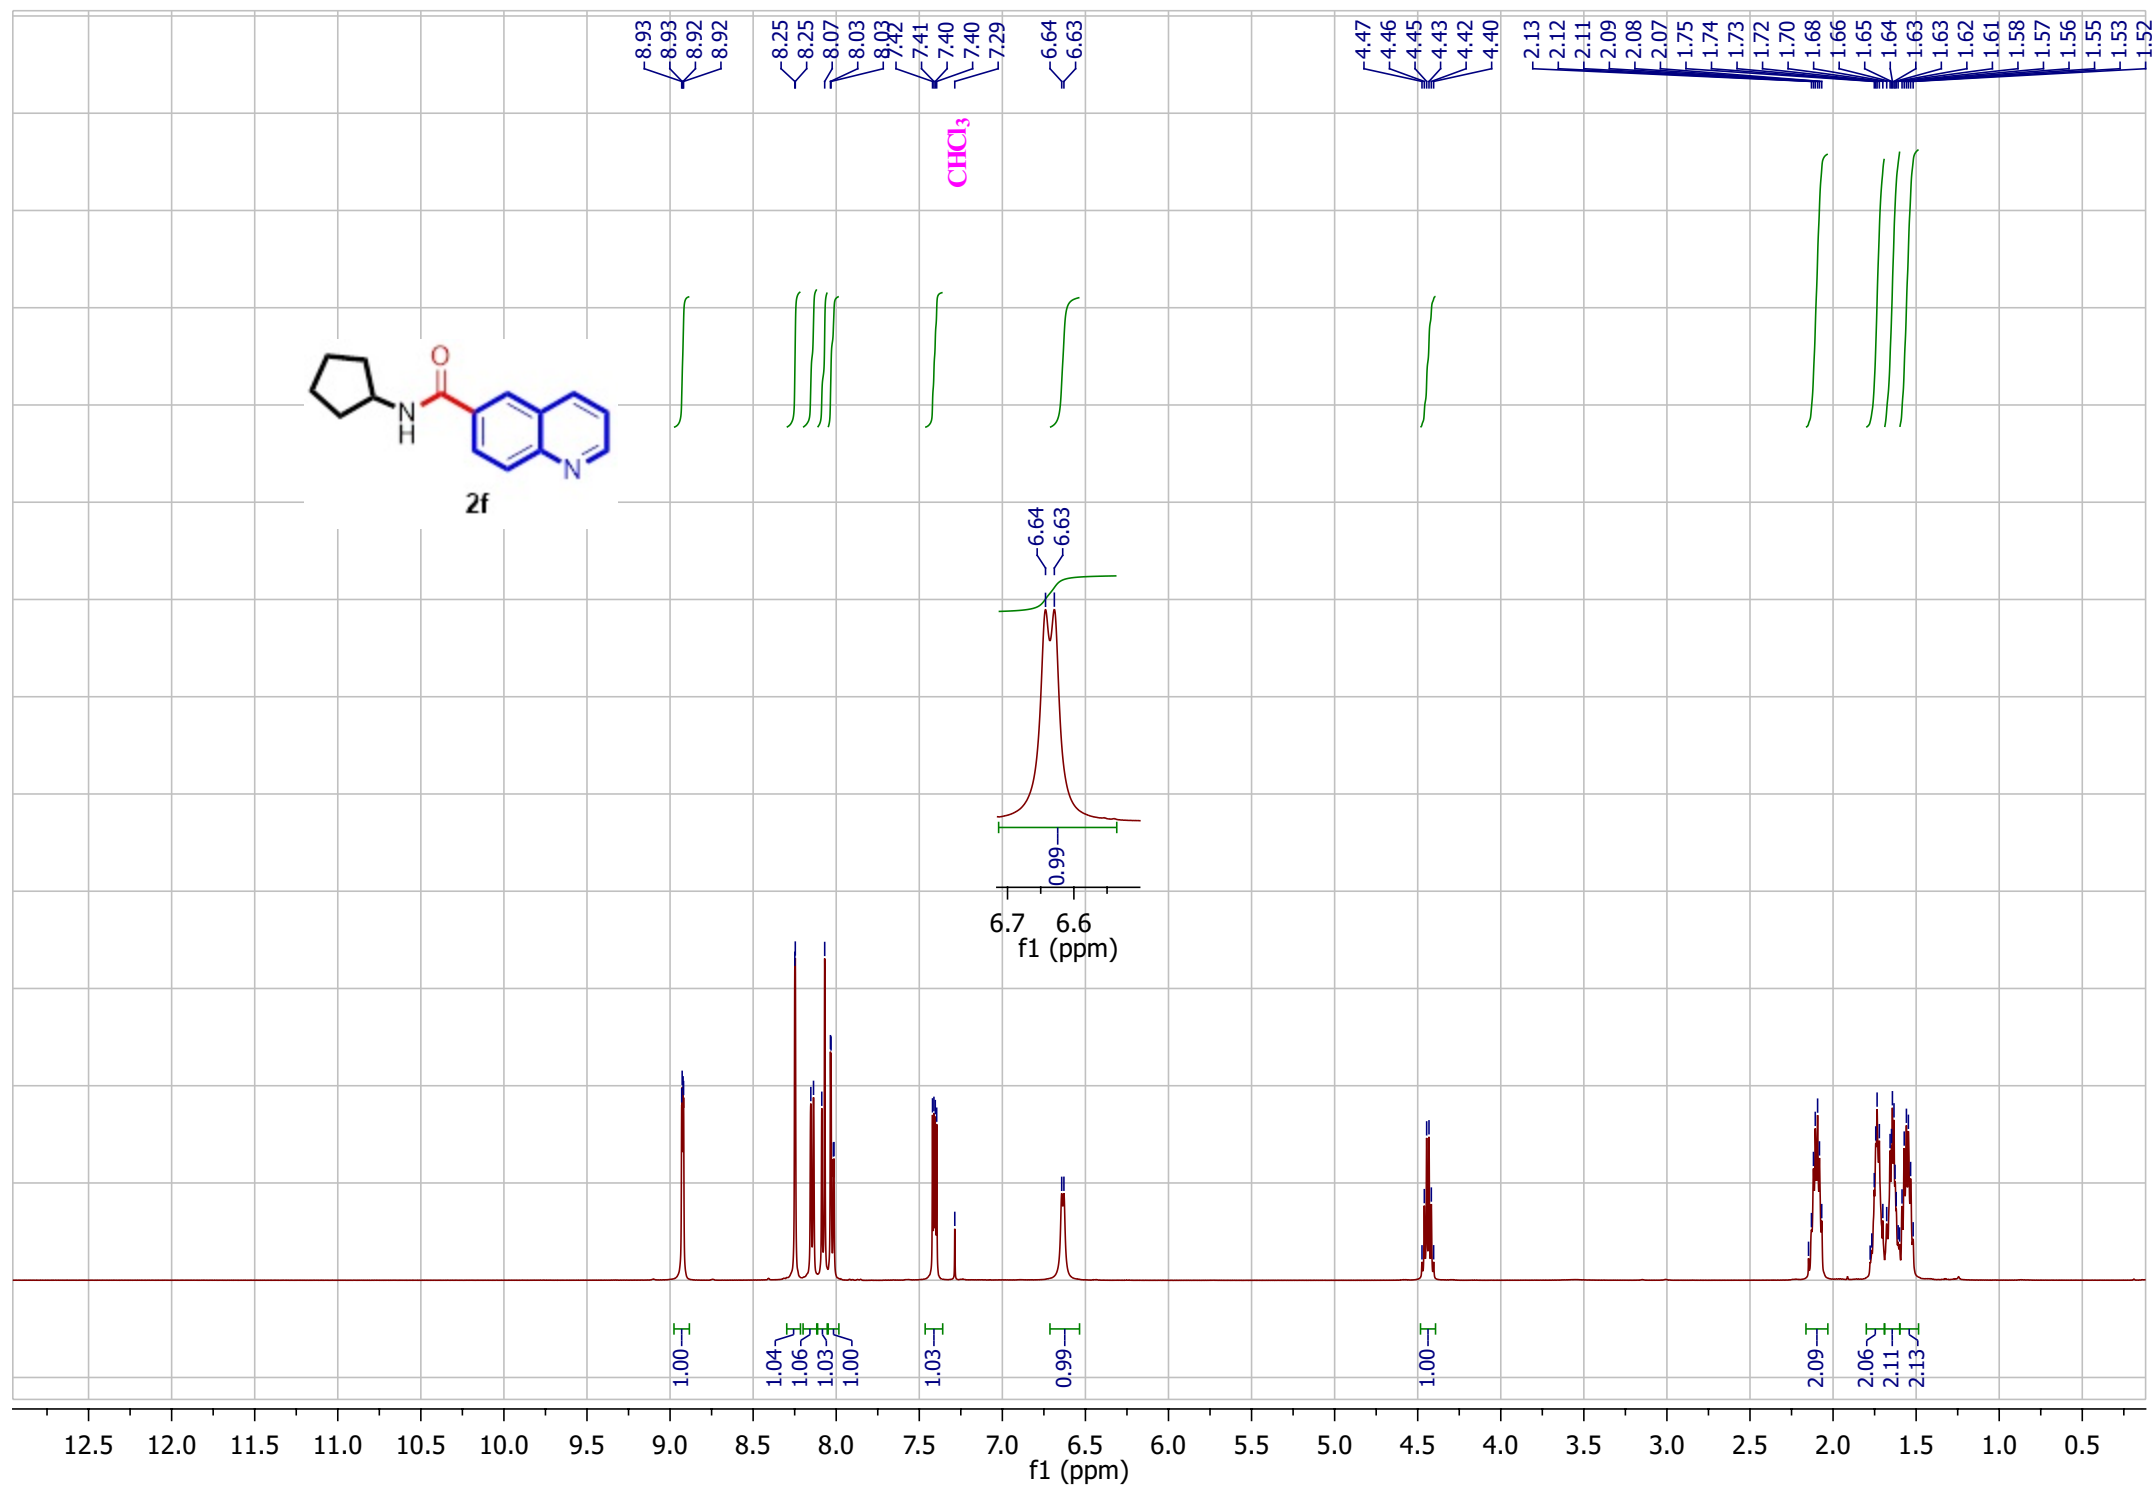



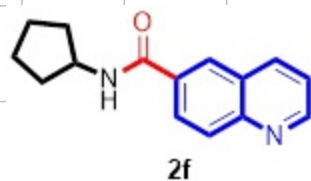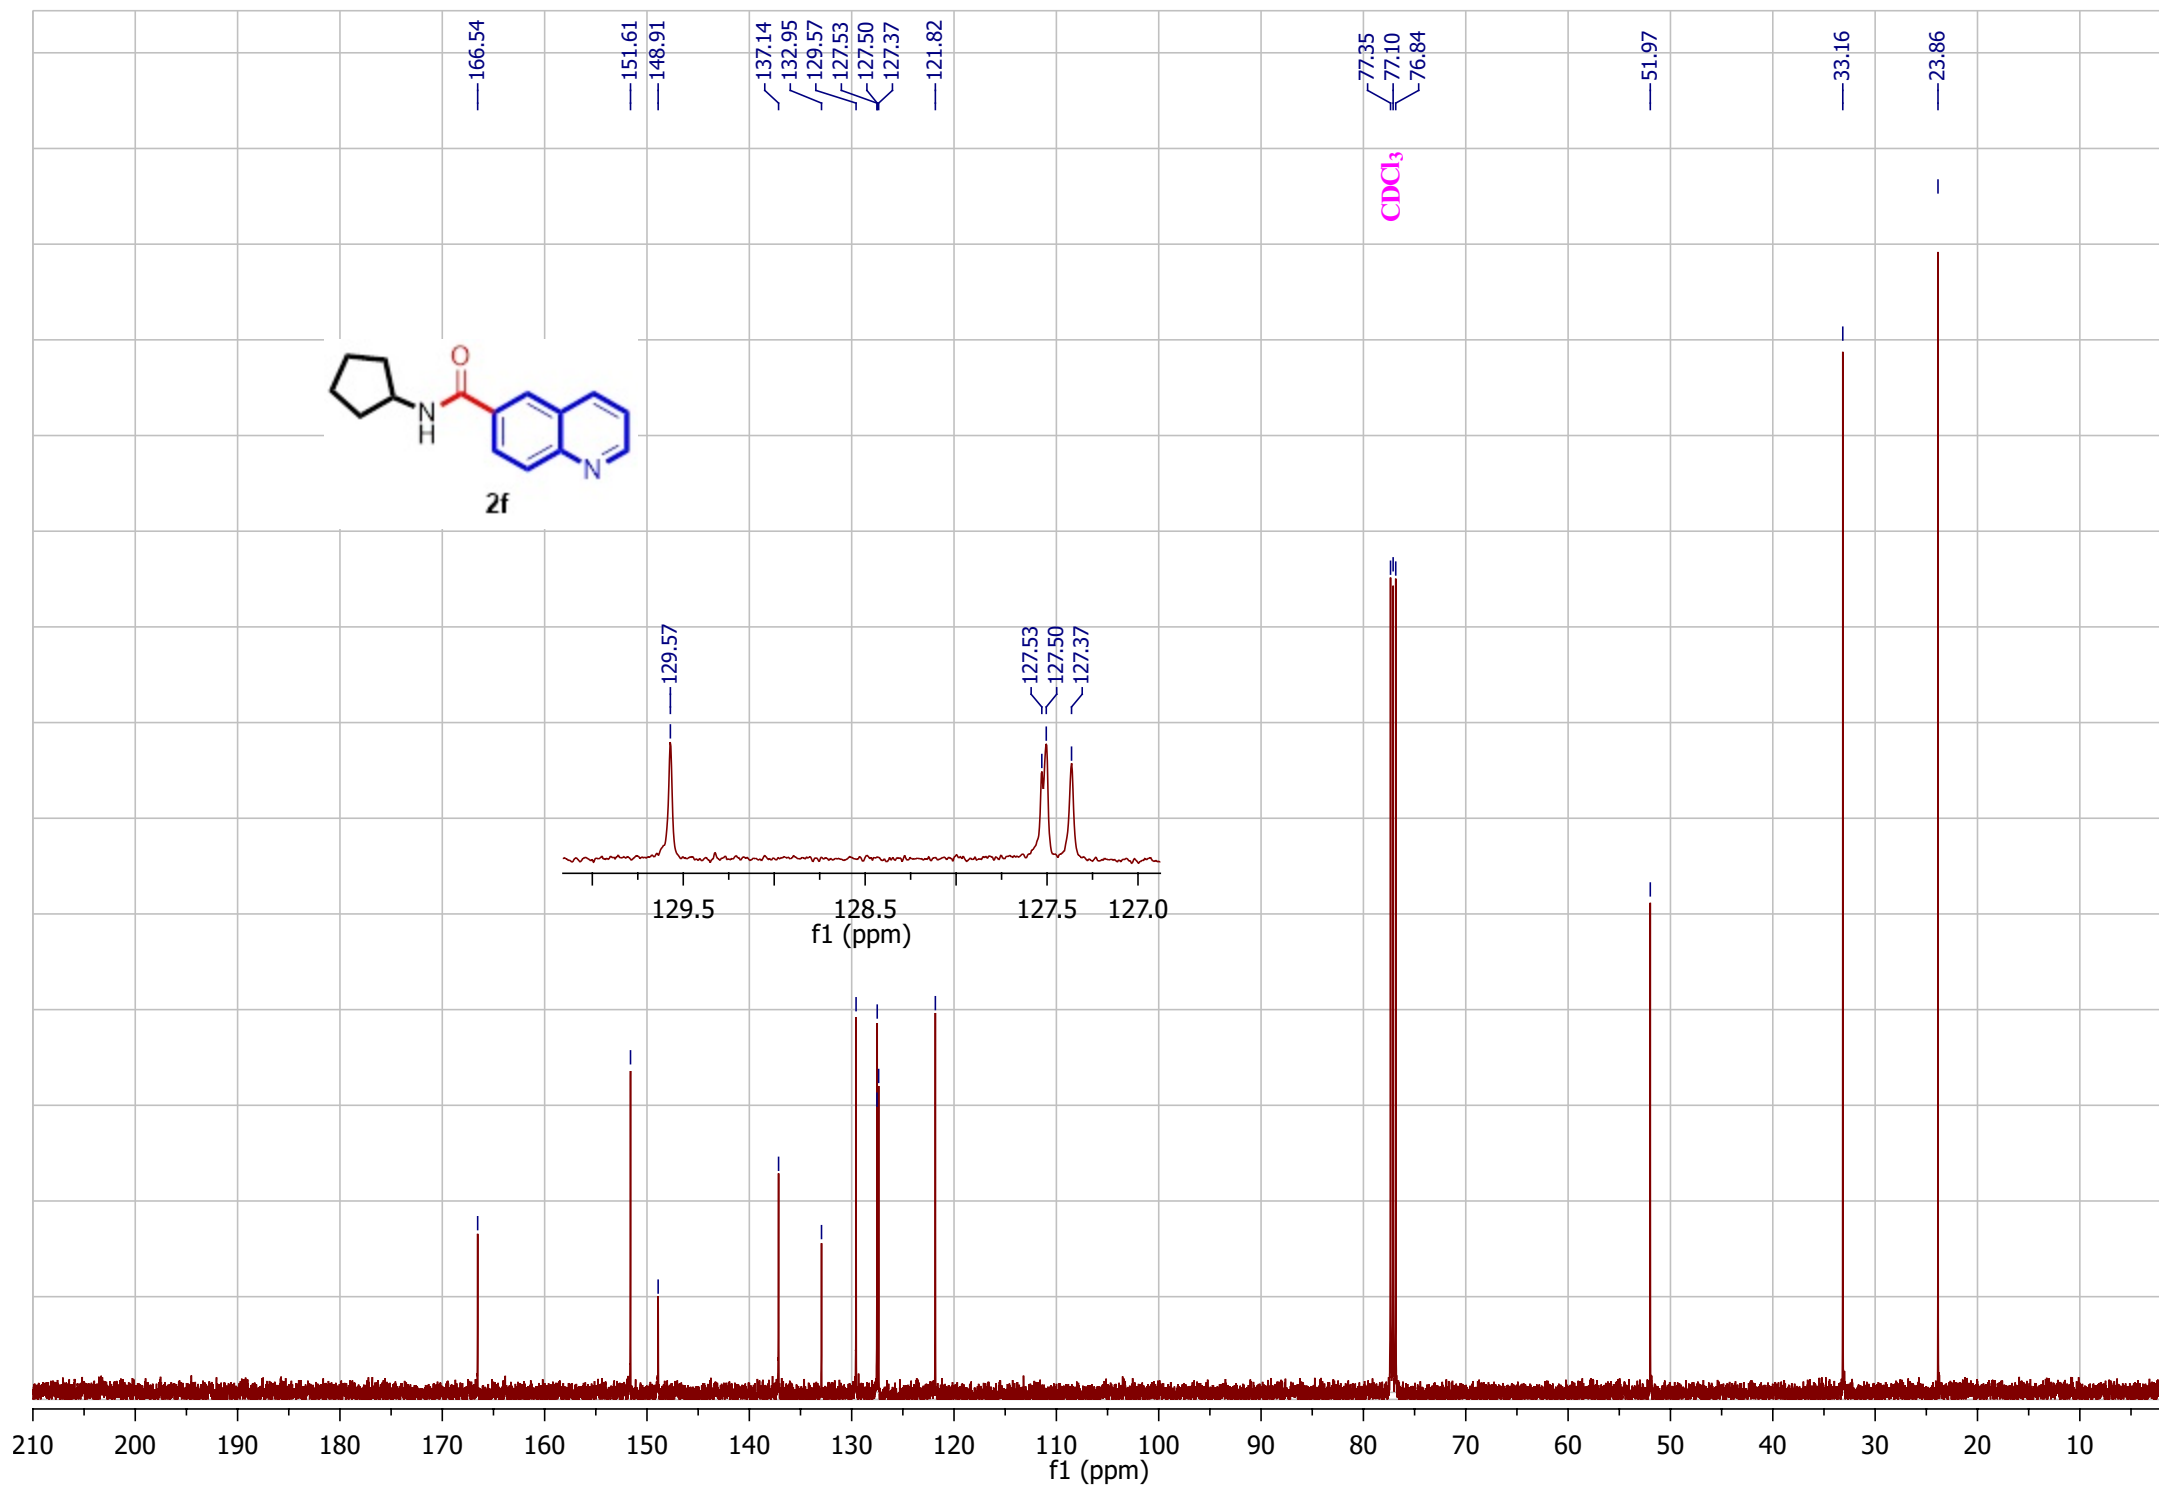

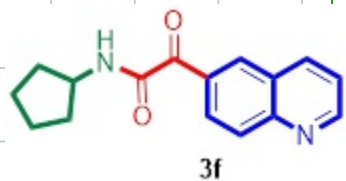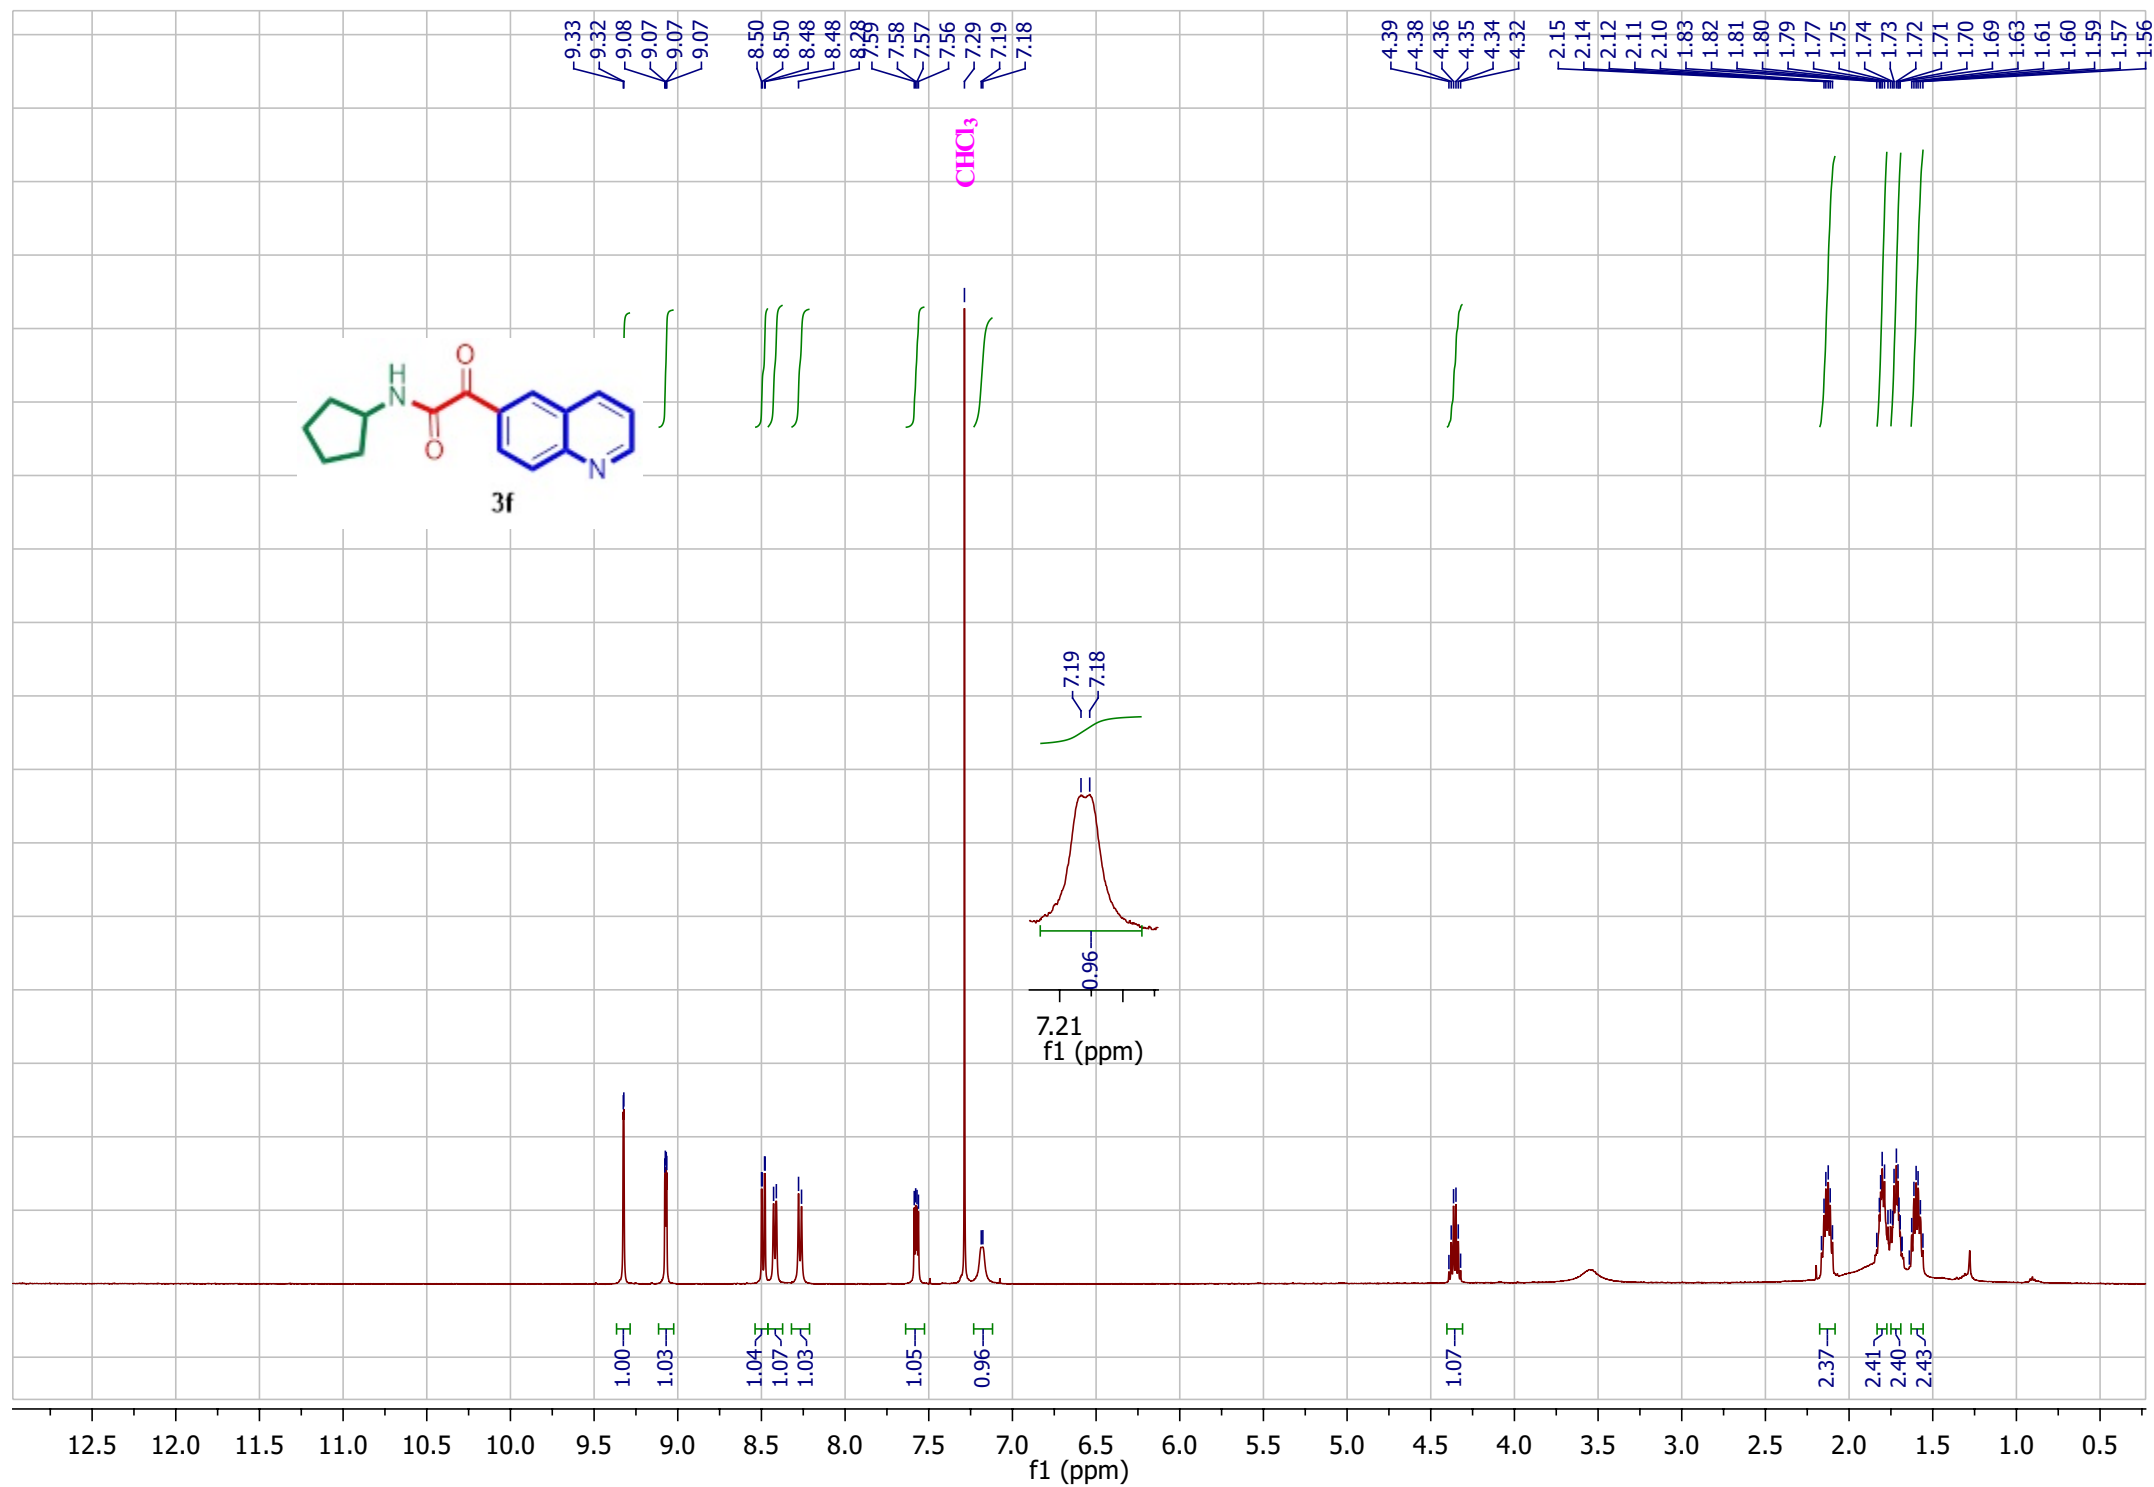

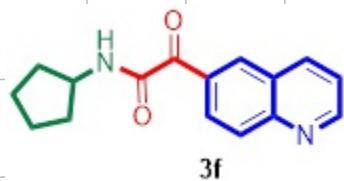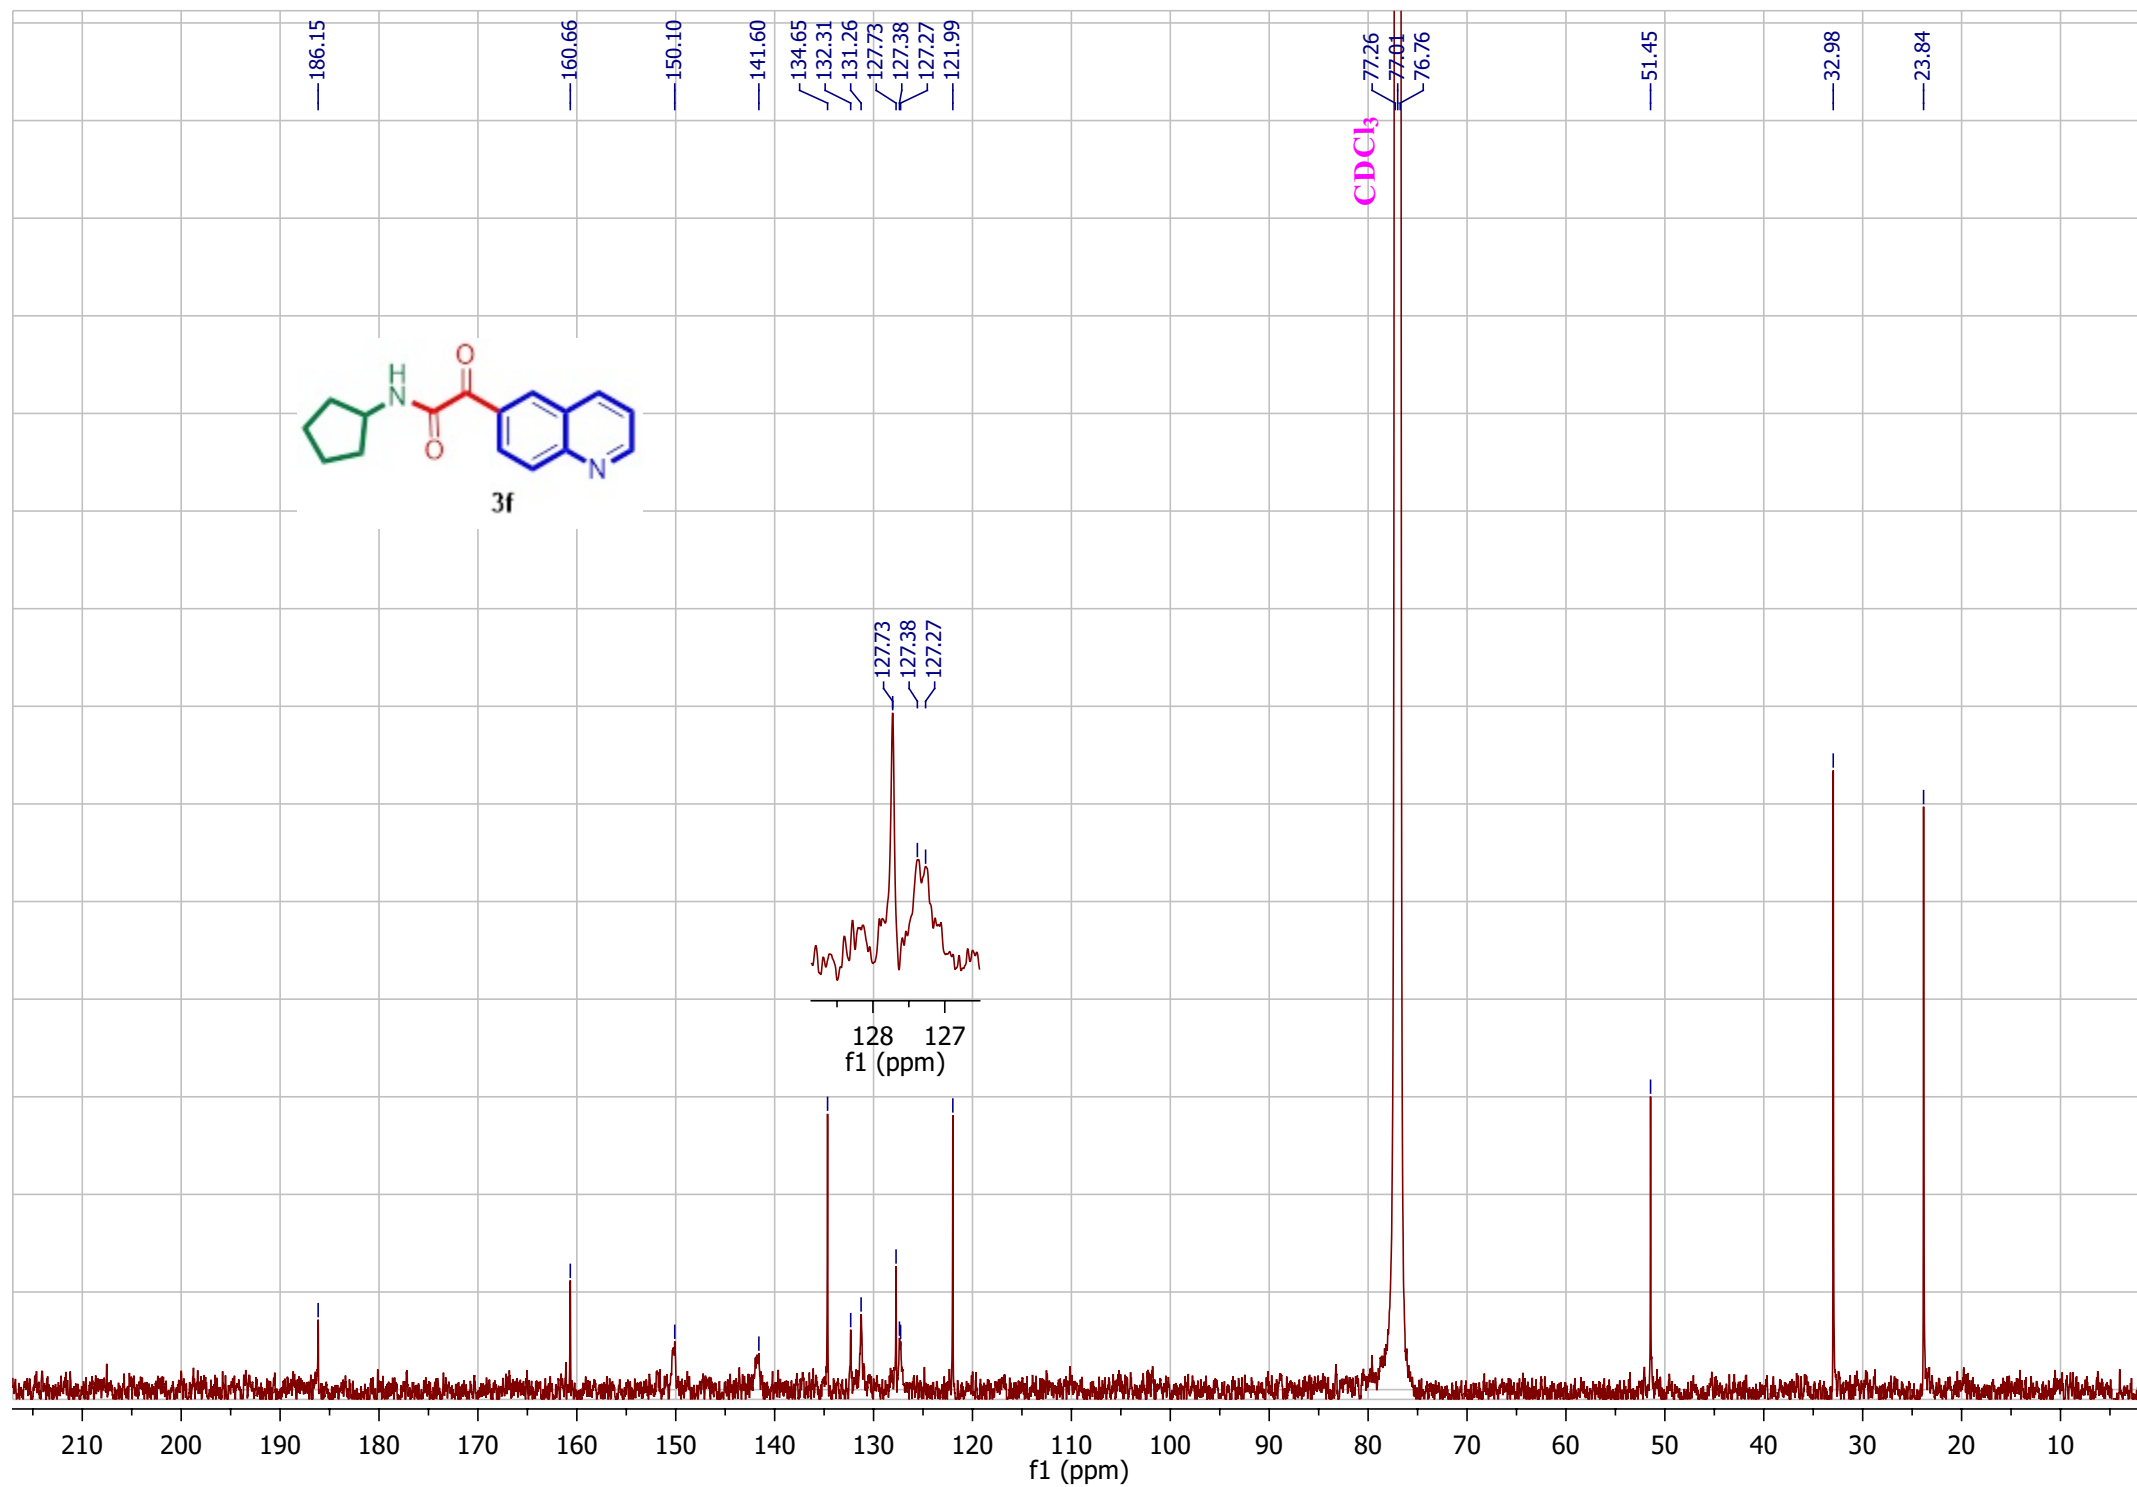

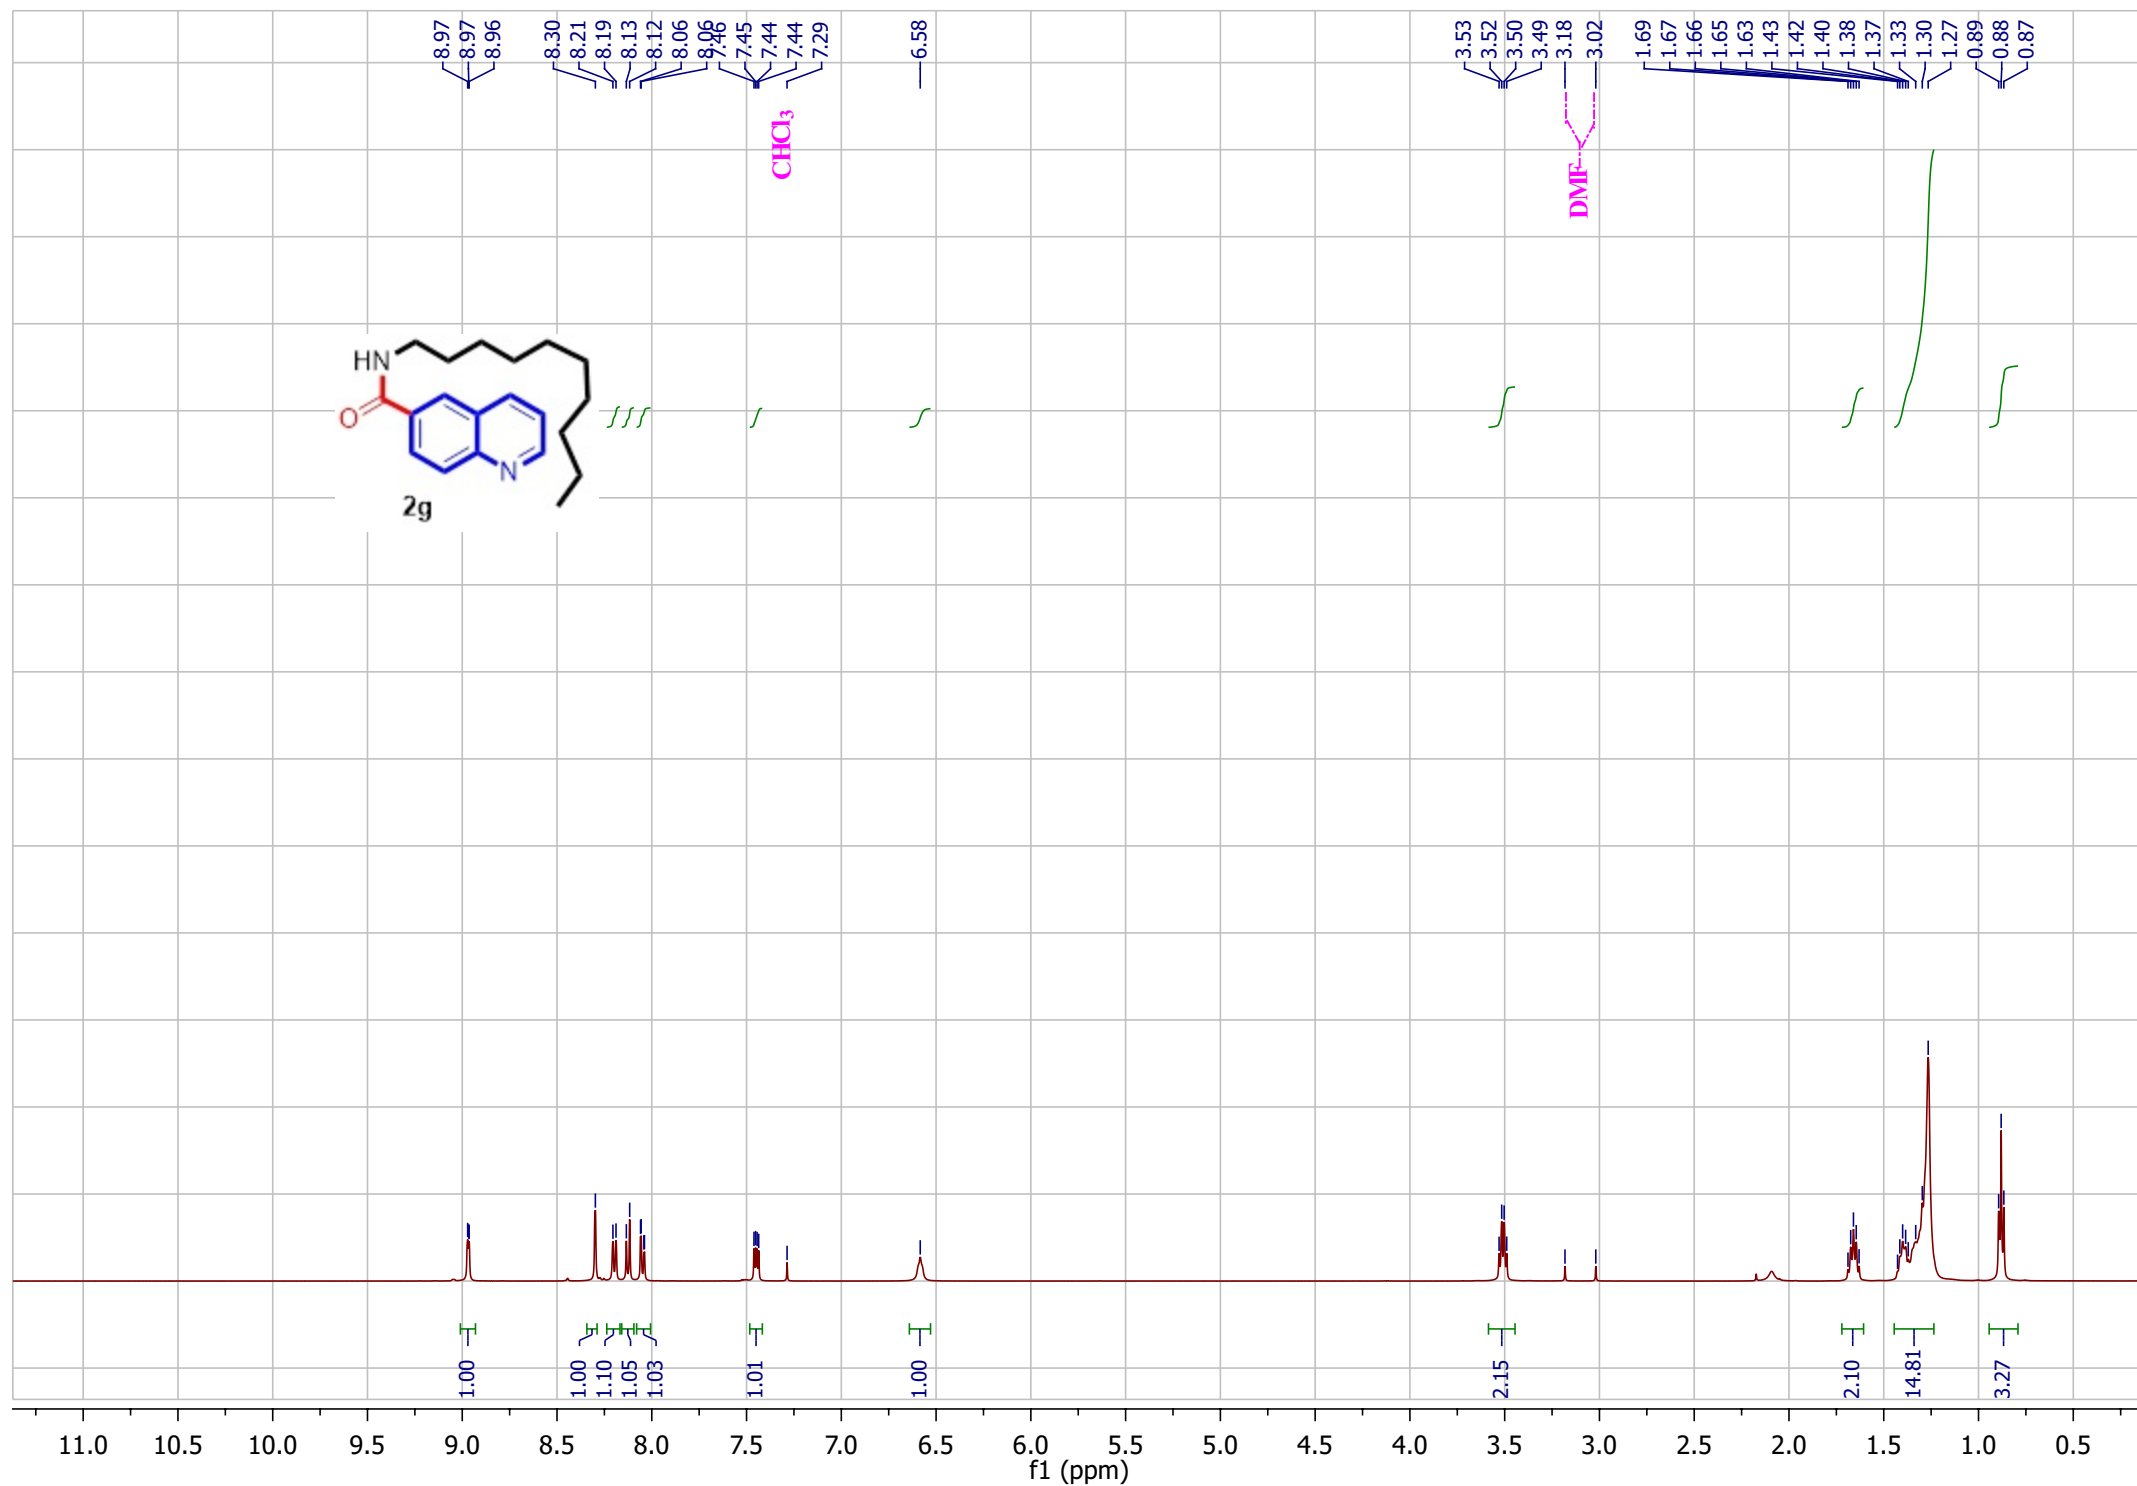

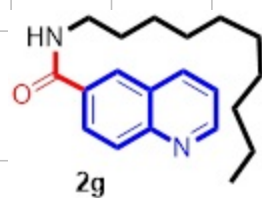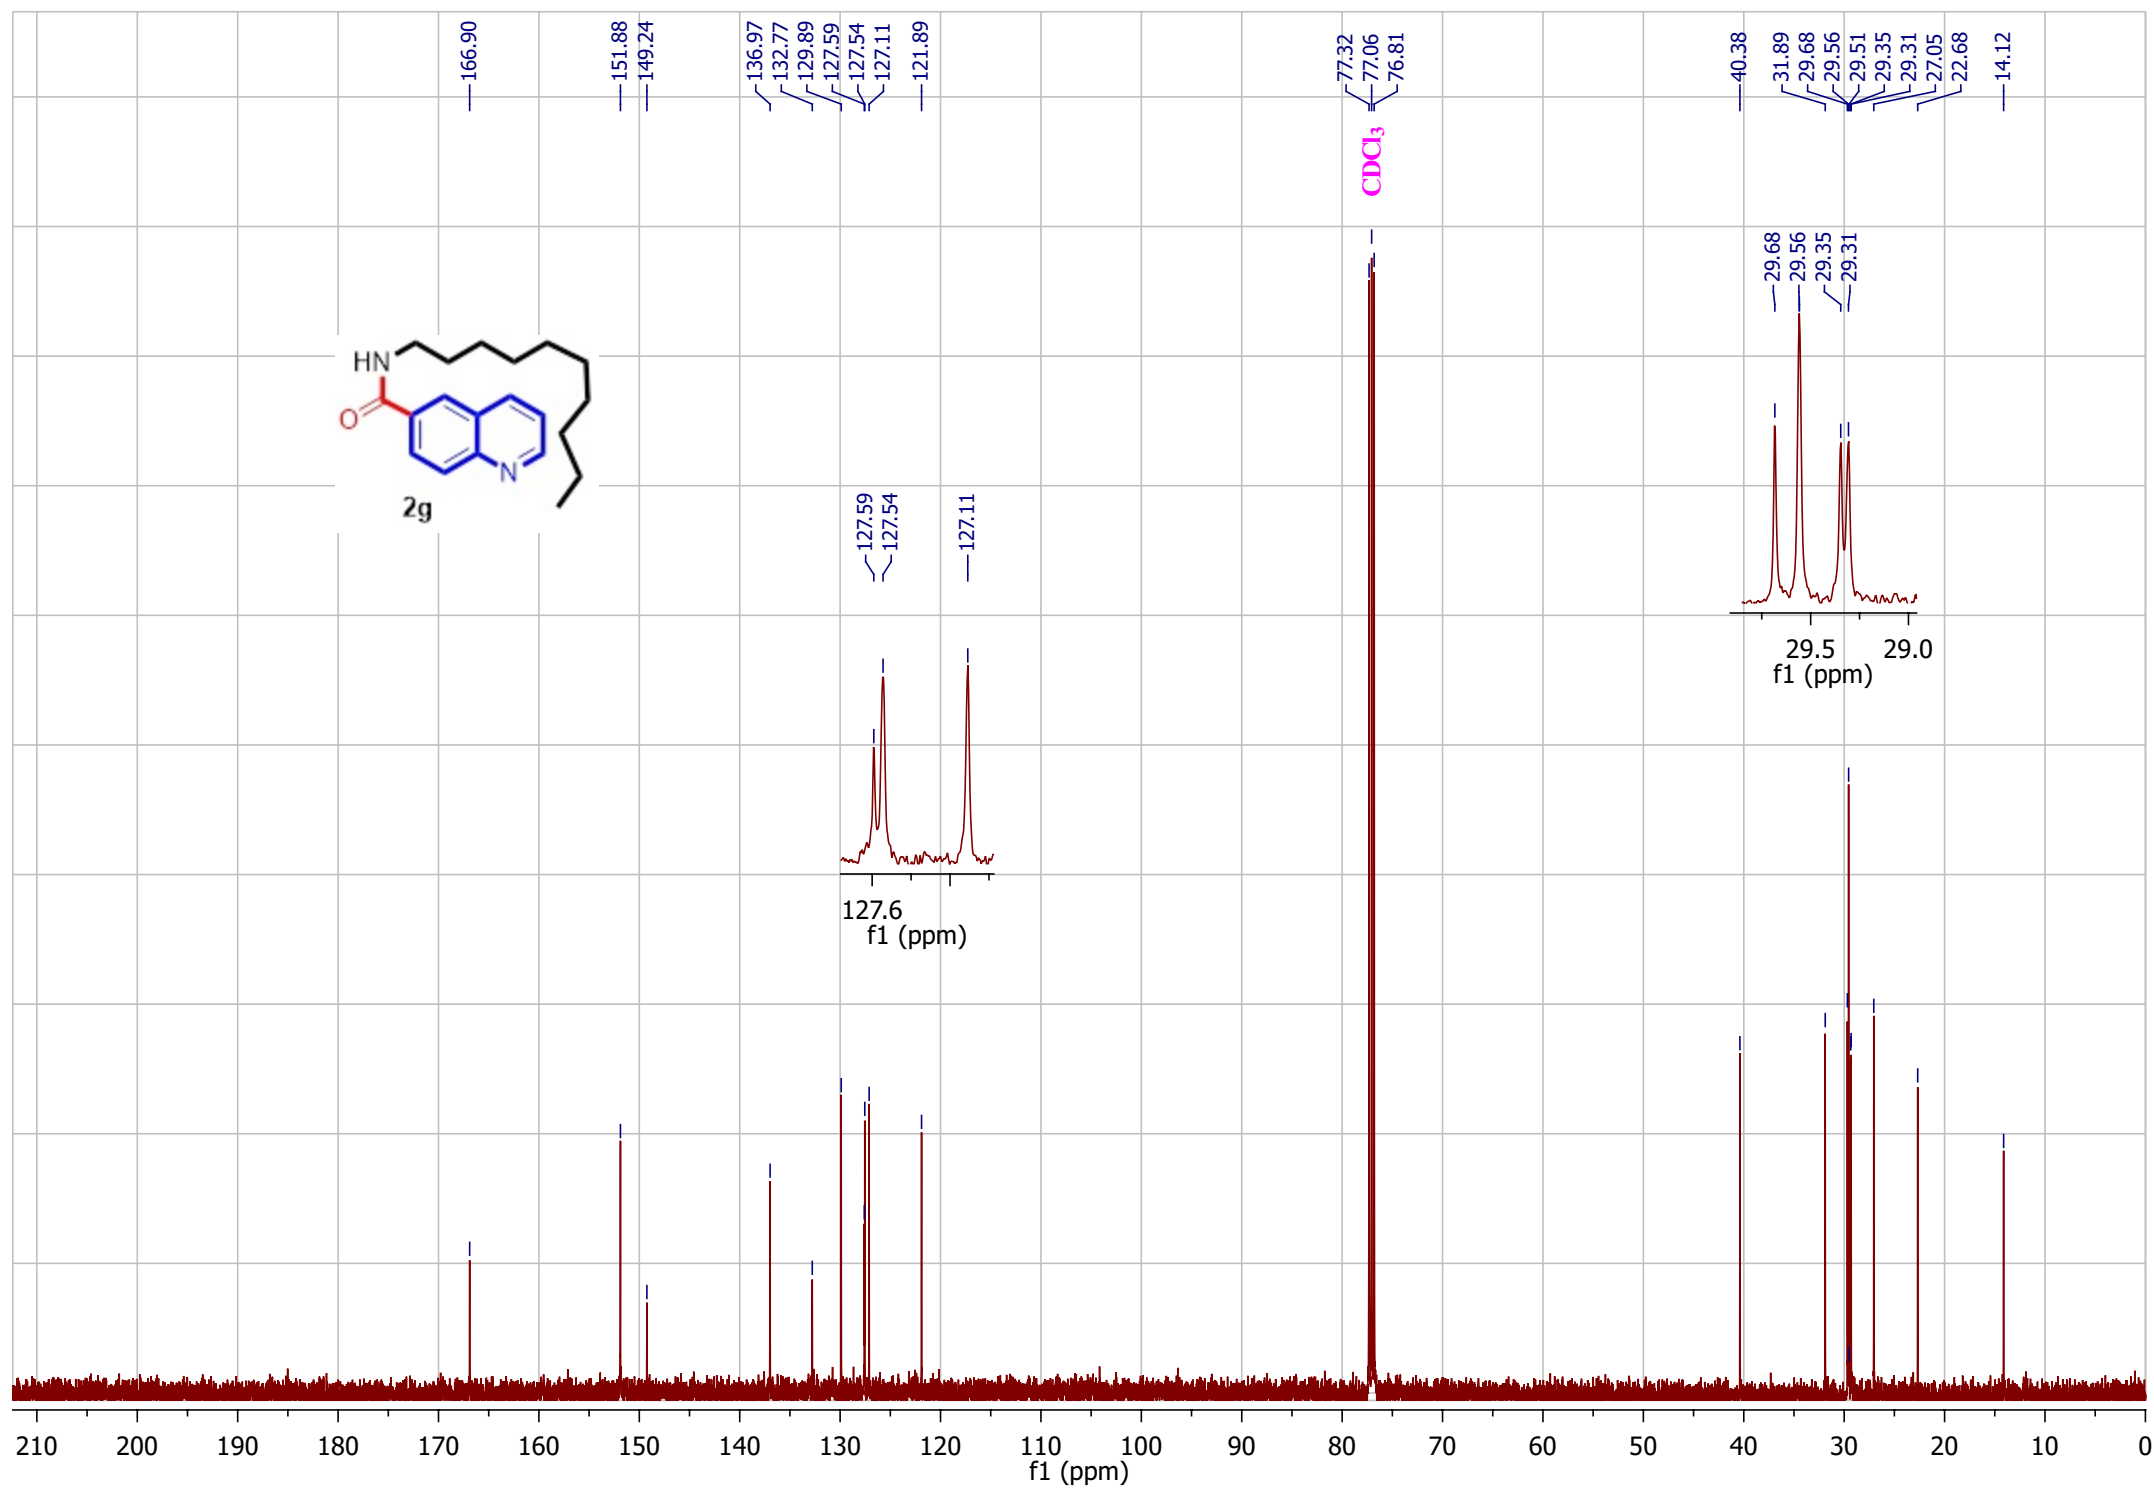

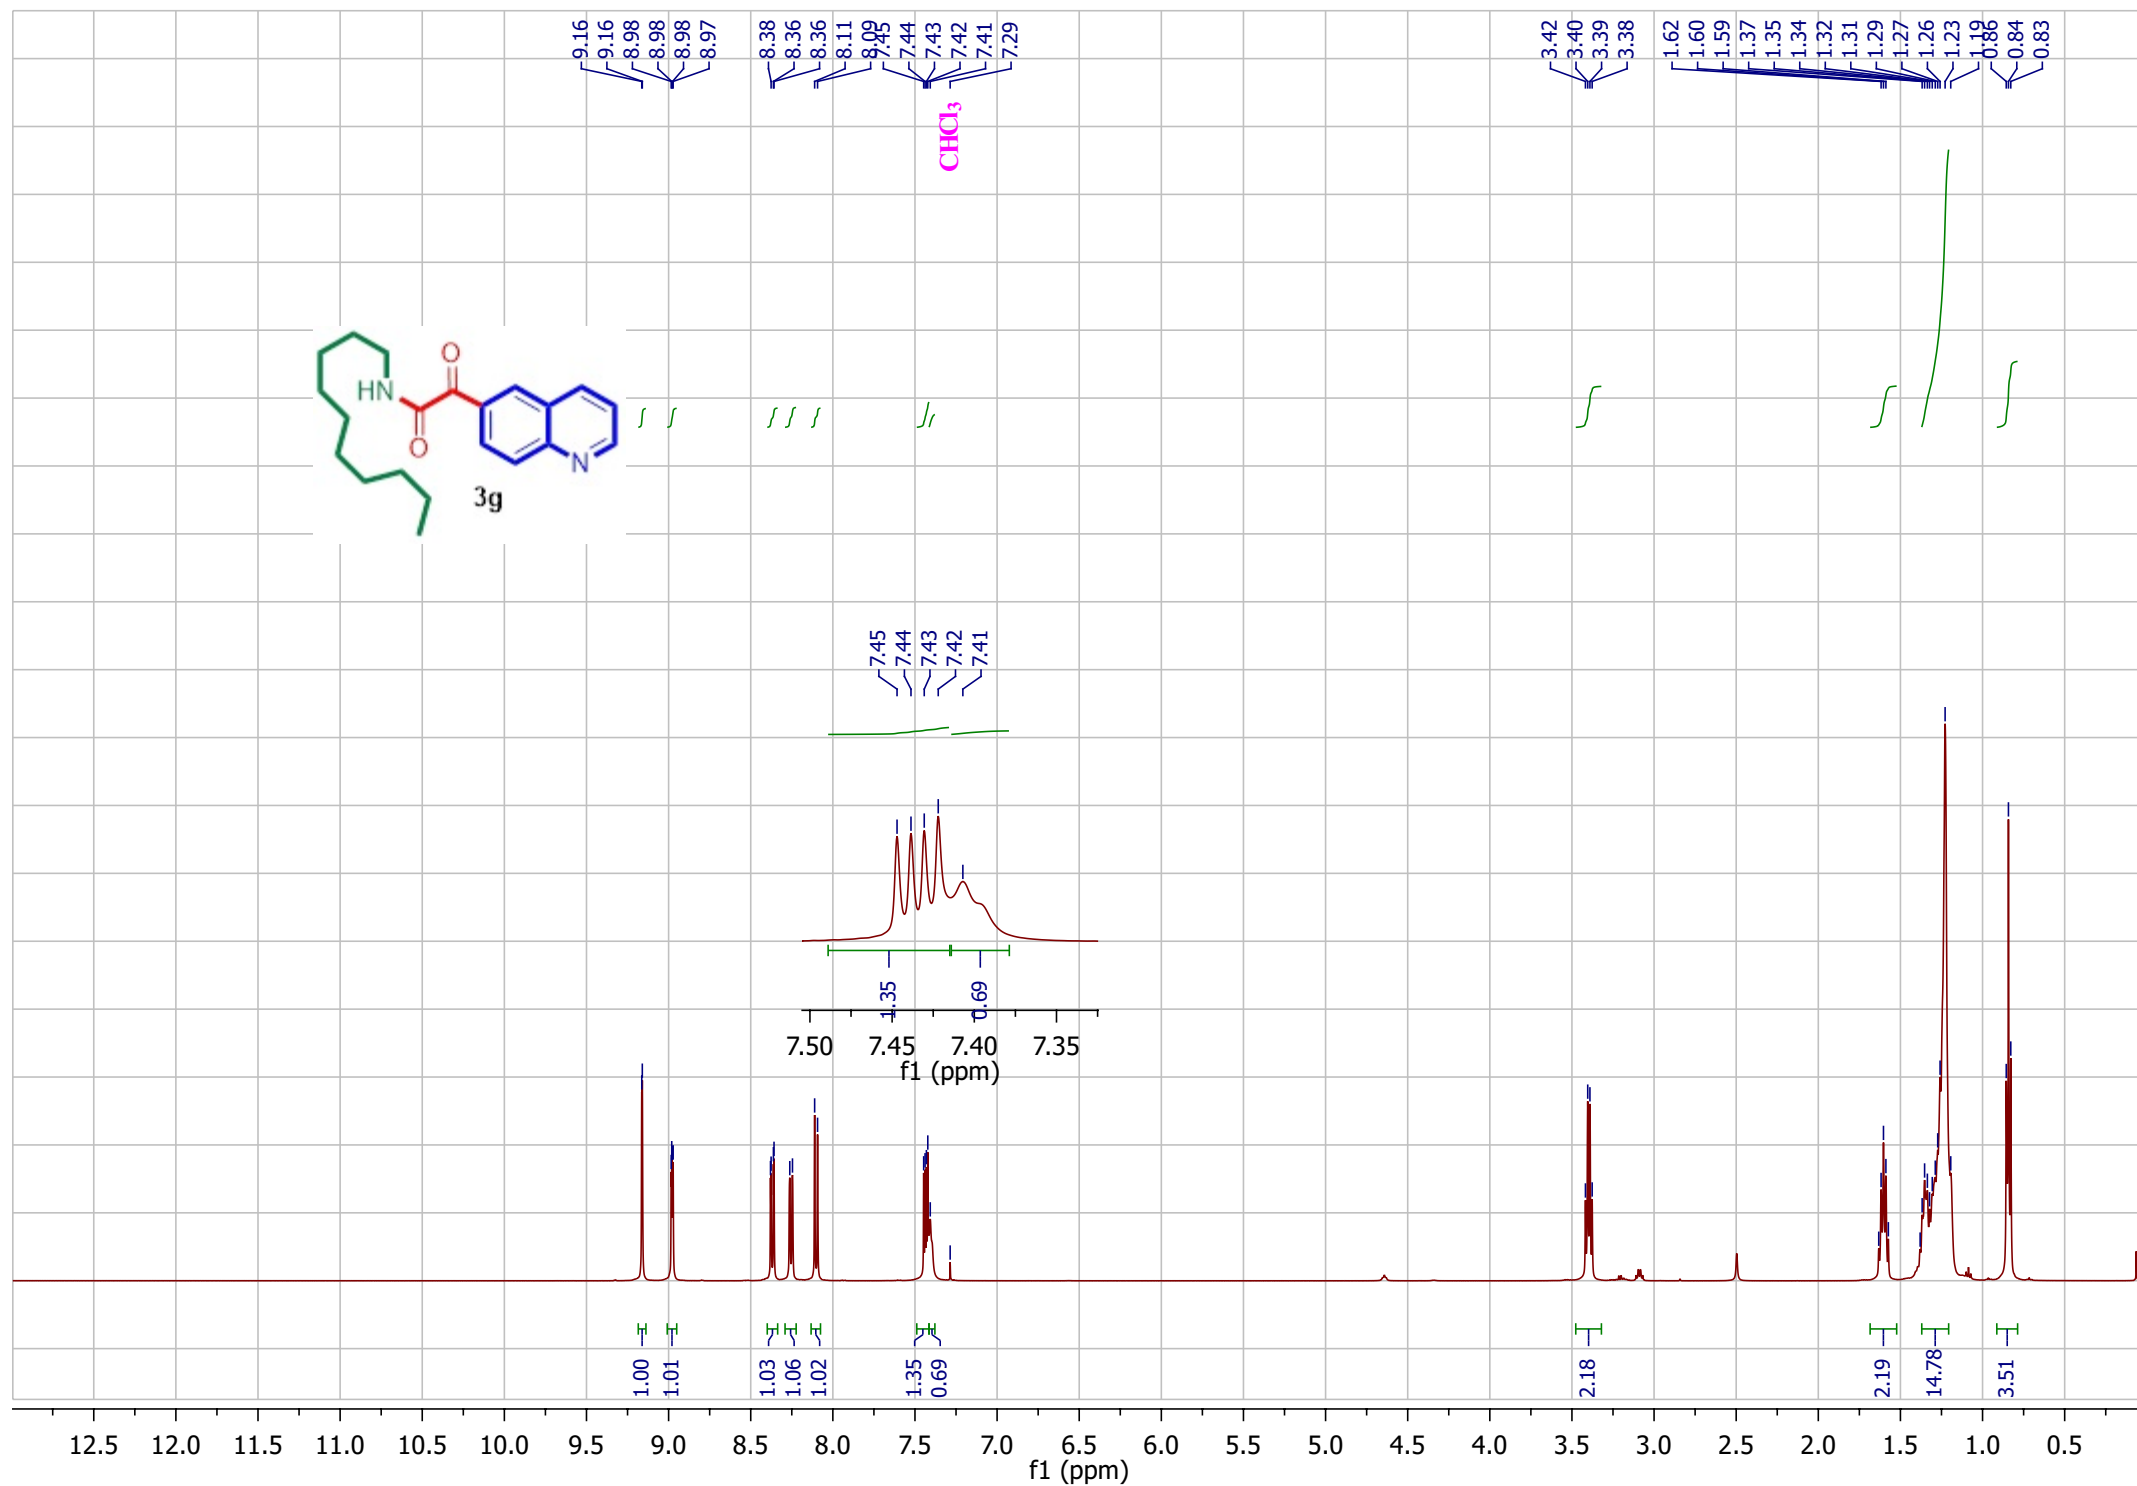

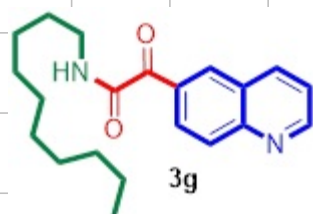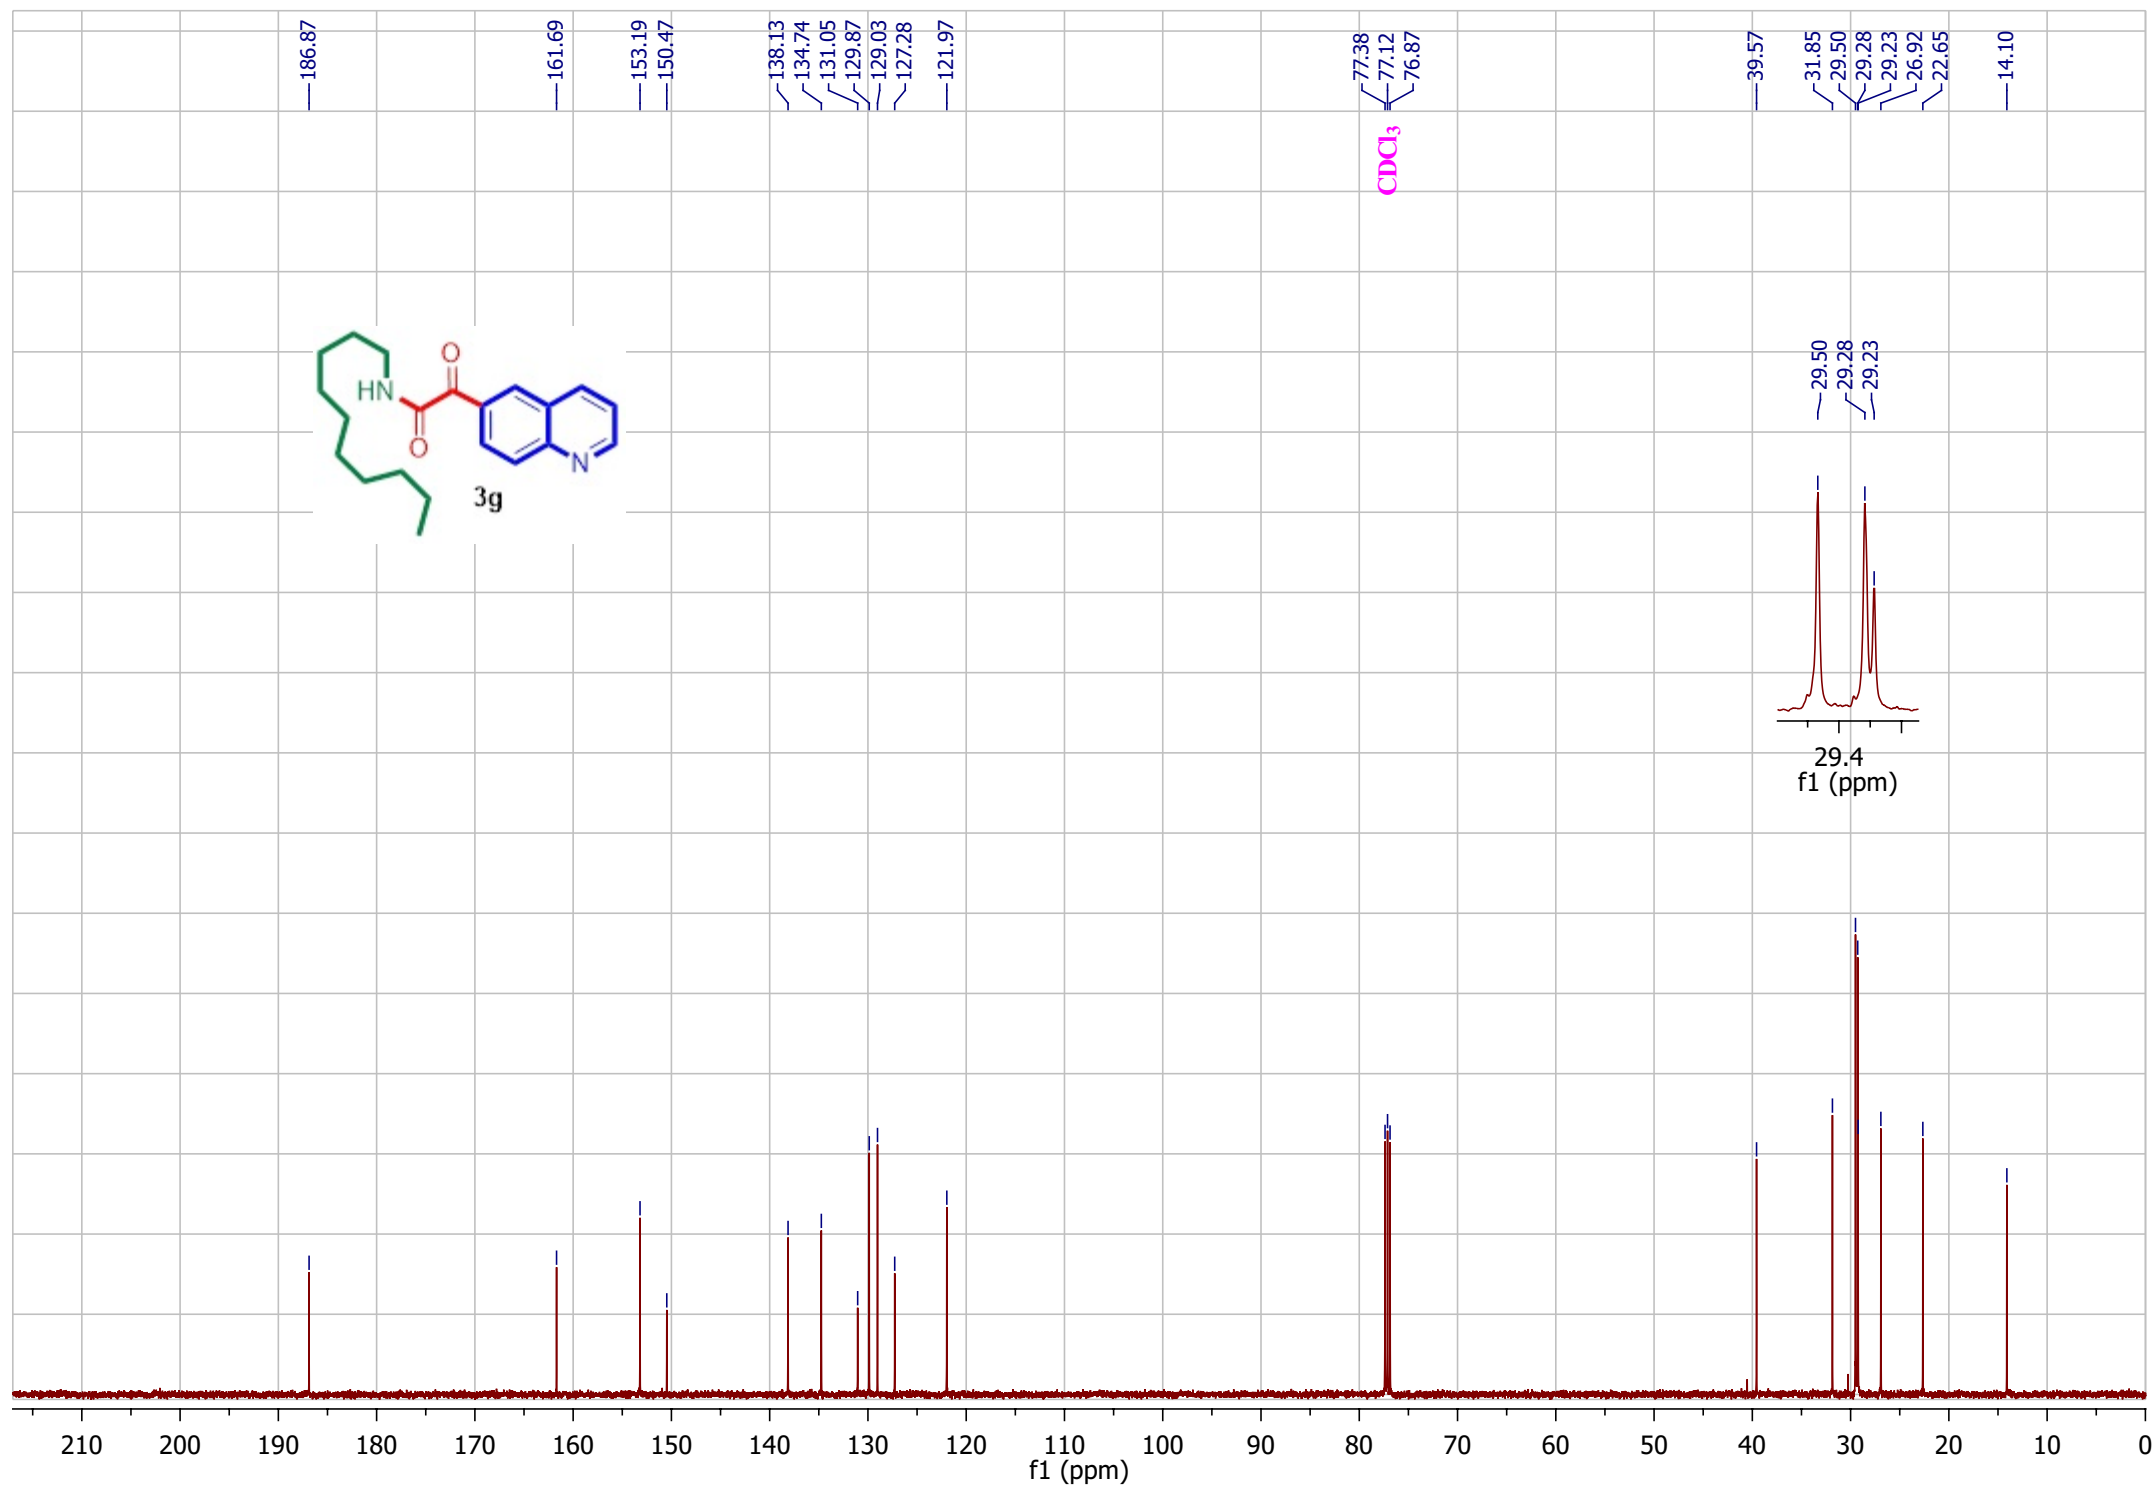

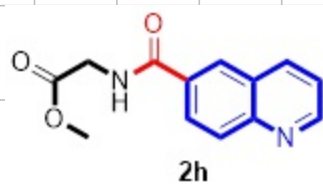

8.98  
8.98  
8.97  
8.33  
8.33  
8.11  
8.09  
8.09  
7.46  
7.46  
7.45  
7.29  
7.25  
CHCl<sub>3</sub>

4.32  
4.31  
3.82

7.29  
7.25  
0.93  
7.29  
7.20  
f1 (ppm)

1.00

1.03

1.03

1.01

0.98

1.04

0.93

2.02

3.04

12.5 12.0 11.5 11.0 10.5 10.0 9.5 9.0 8.5 8.0 7.5 7.0 6.5 6.0 5.5 5.0 4.5 4.0 3.5 3.0 2.5 2.0 1.5 1.0 0.5  
f1 (ppm)



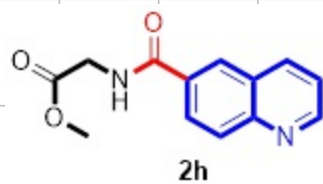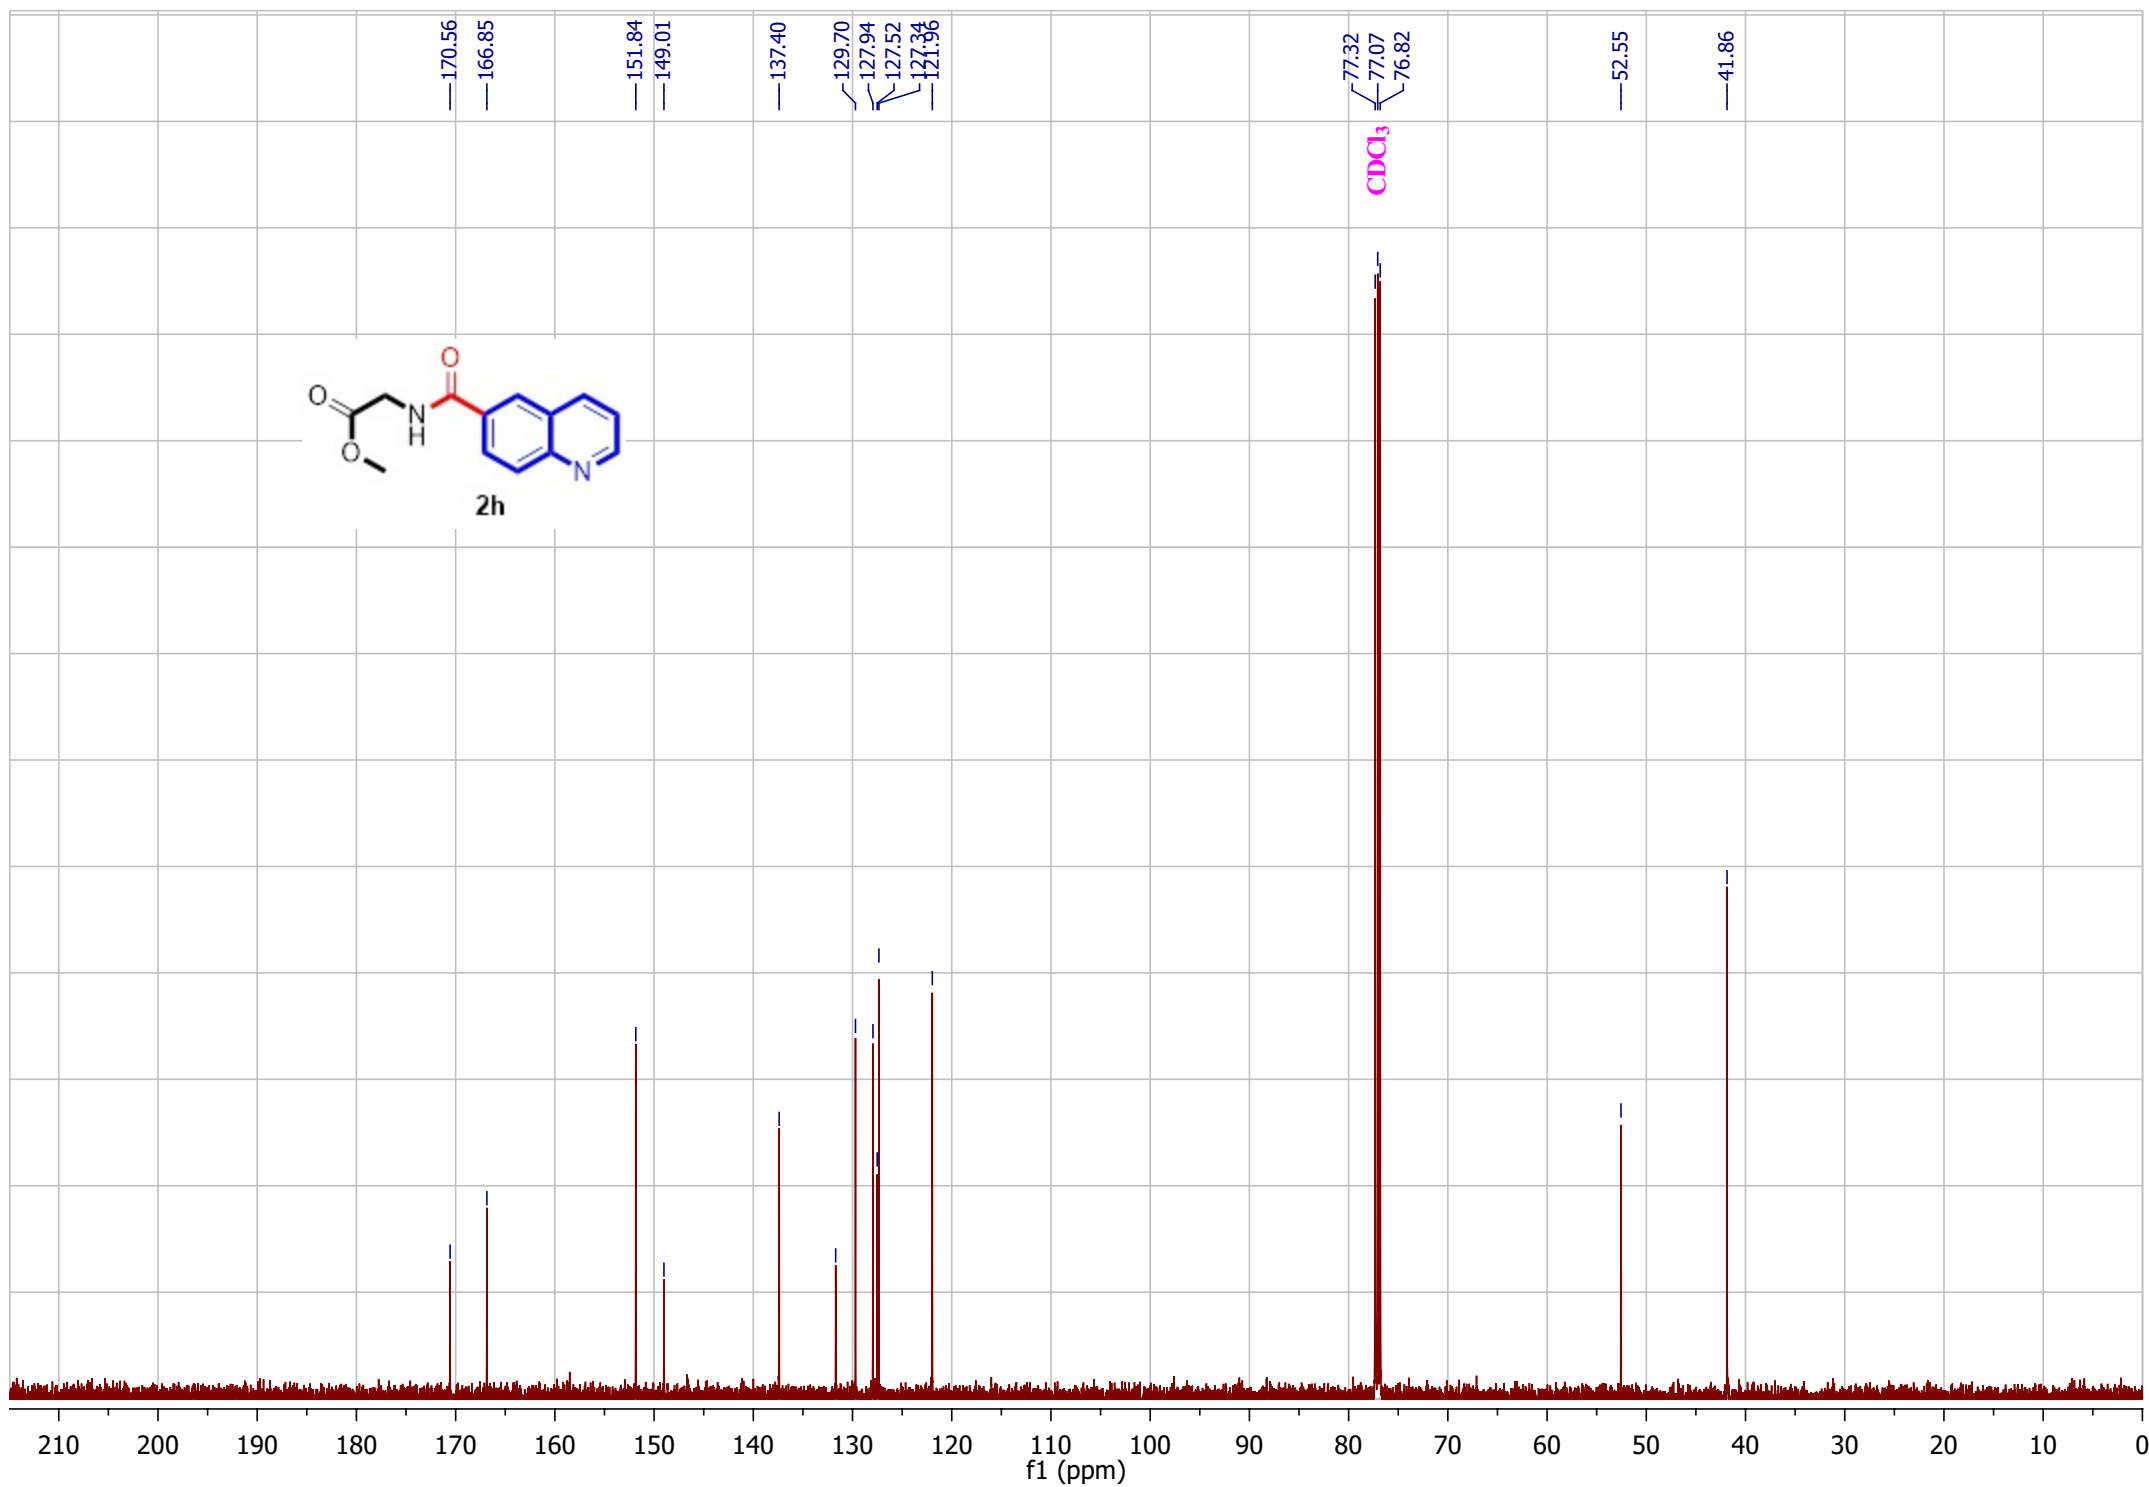

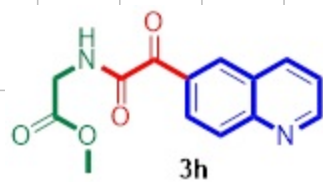

9.00  
8.92  
8.92  
8.91  
8.27  
8.19  
8.17  
8.03  
8.01  
7.38  
7.37  
7.36  
7.28  
CHCl<sub>3</sub>

4.18  
4.17

3.73

8.06  
8.03  
8.01  
0.98  
1.01  
8.05  
f1 (ppm)

1.00  
0.99

1.02  
1.06  
0.98  
1.01

1.02

1.99

2.96

12.5 12.0 11.5 11.0 10.5 10.0 9.5 9.0 8.5 8.0 7.5 7.0 6.5 6.0 5.5 5.0 4.5 4.0 3.5 3.0 2.5 2.0 1.5 1.0 0.5 0.0  
f1 (ppm)

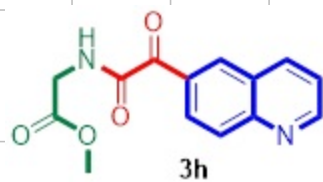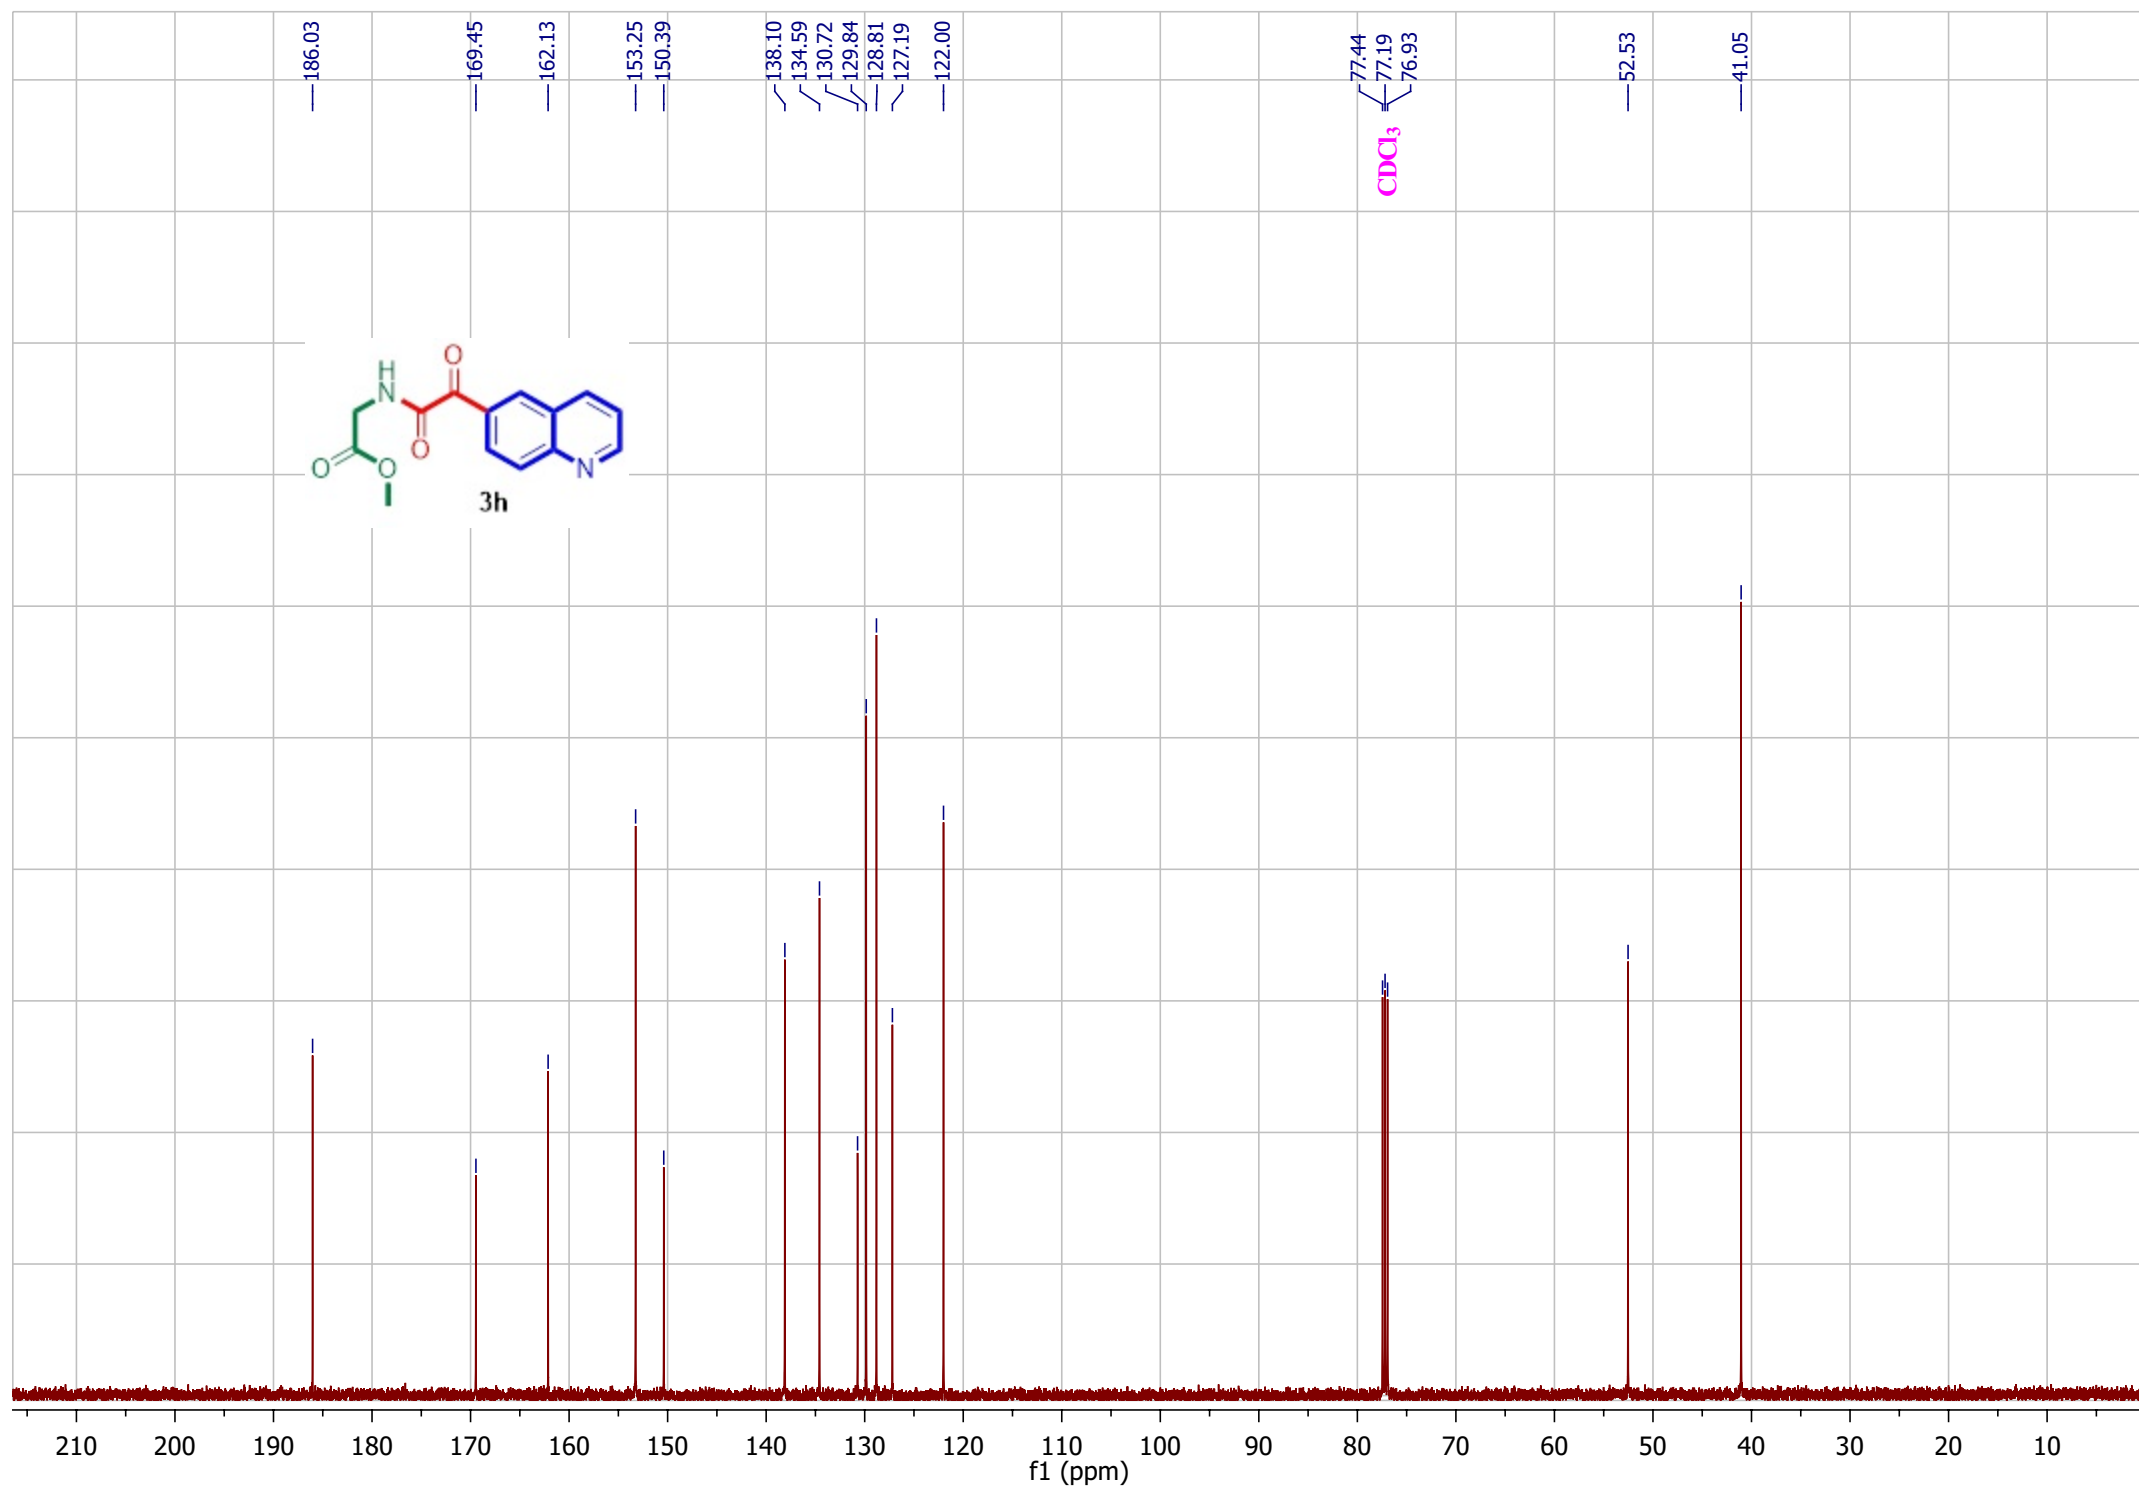

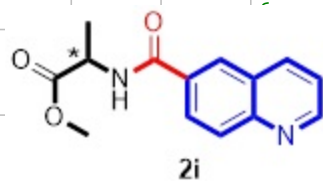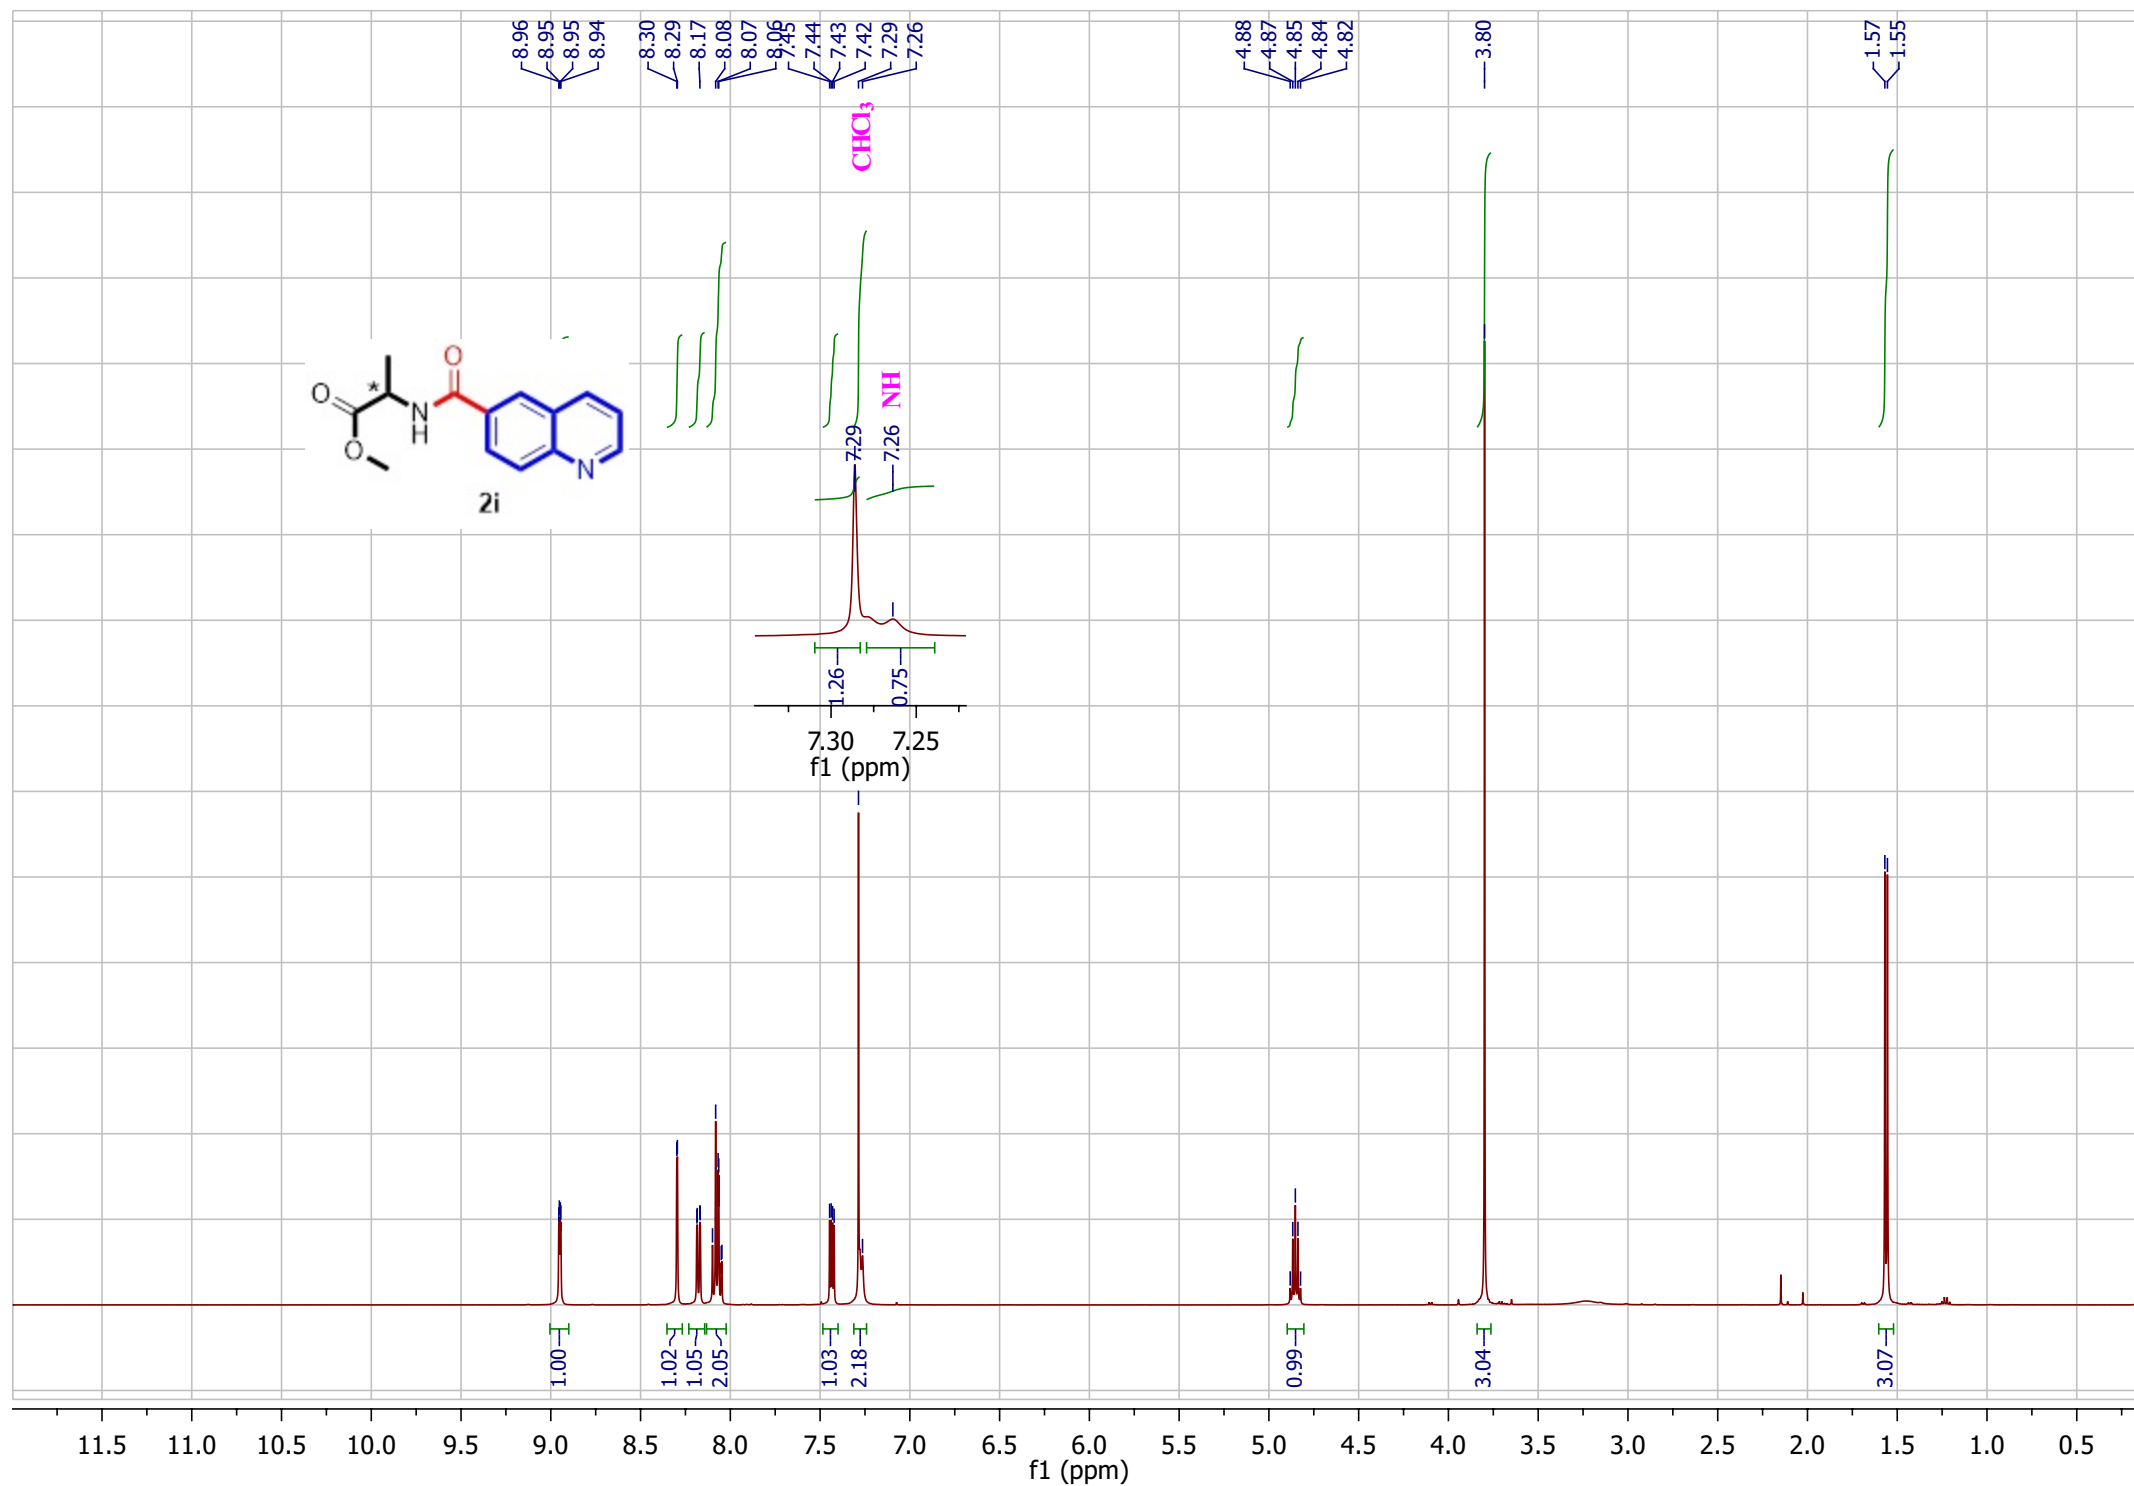

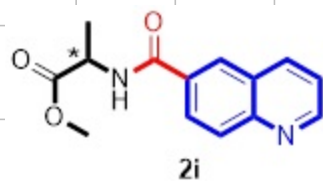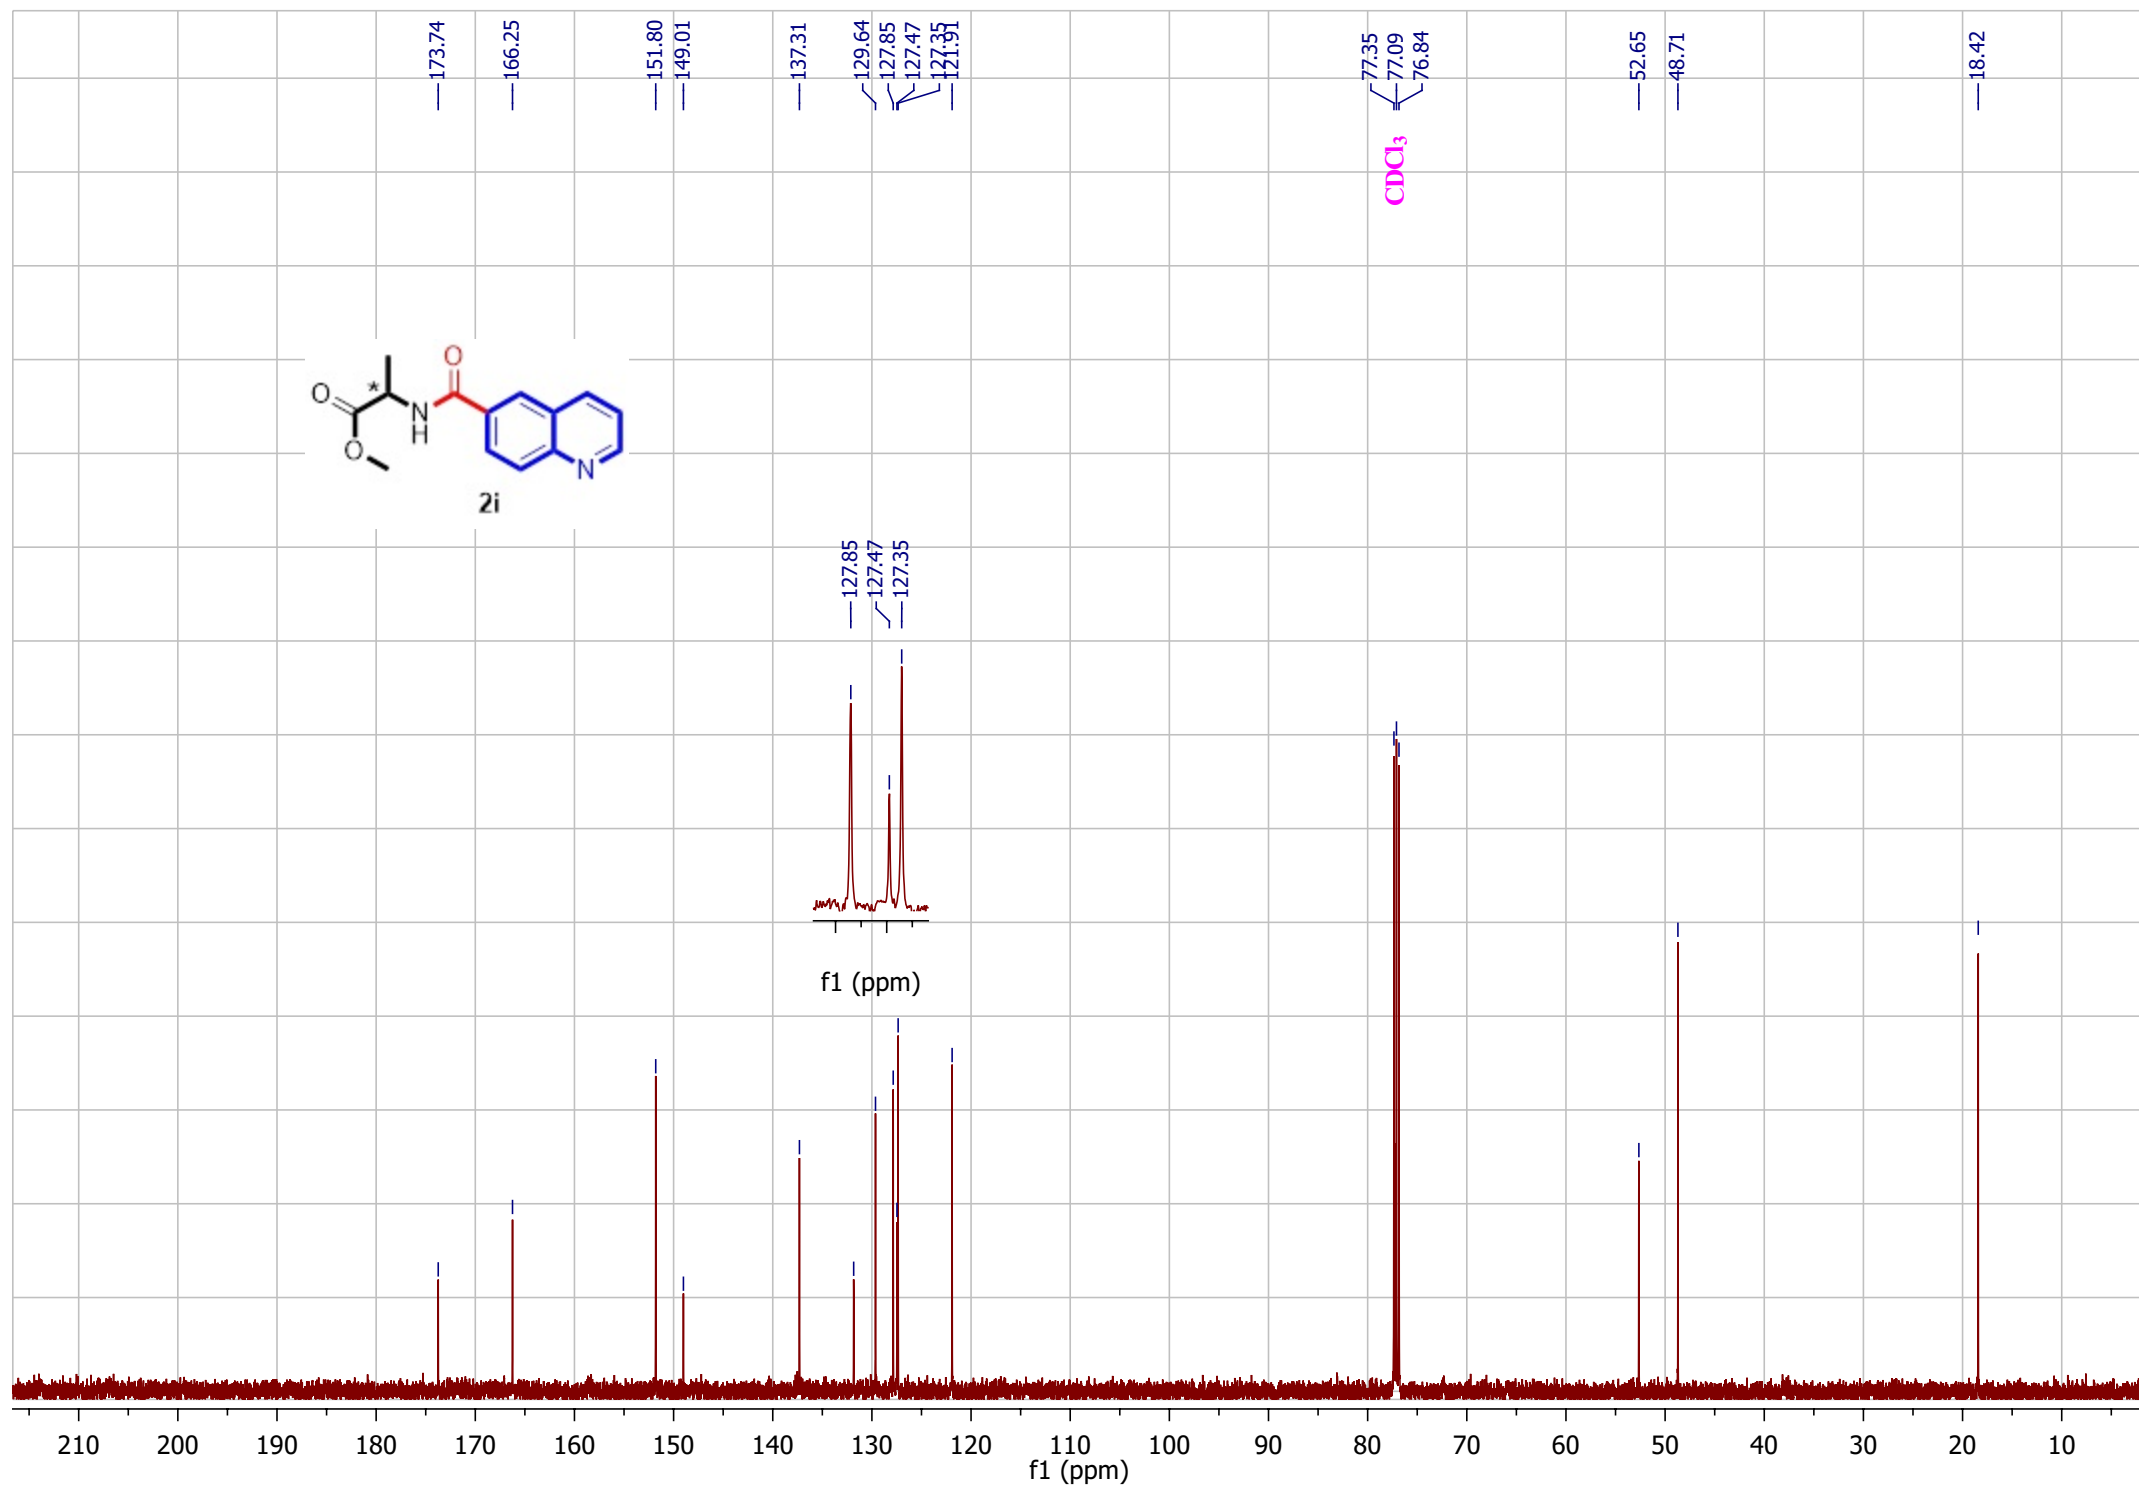

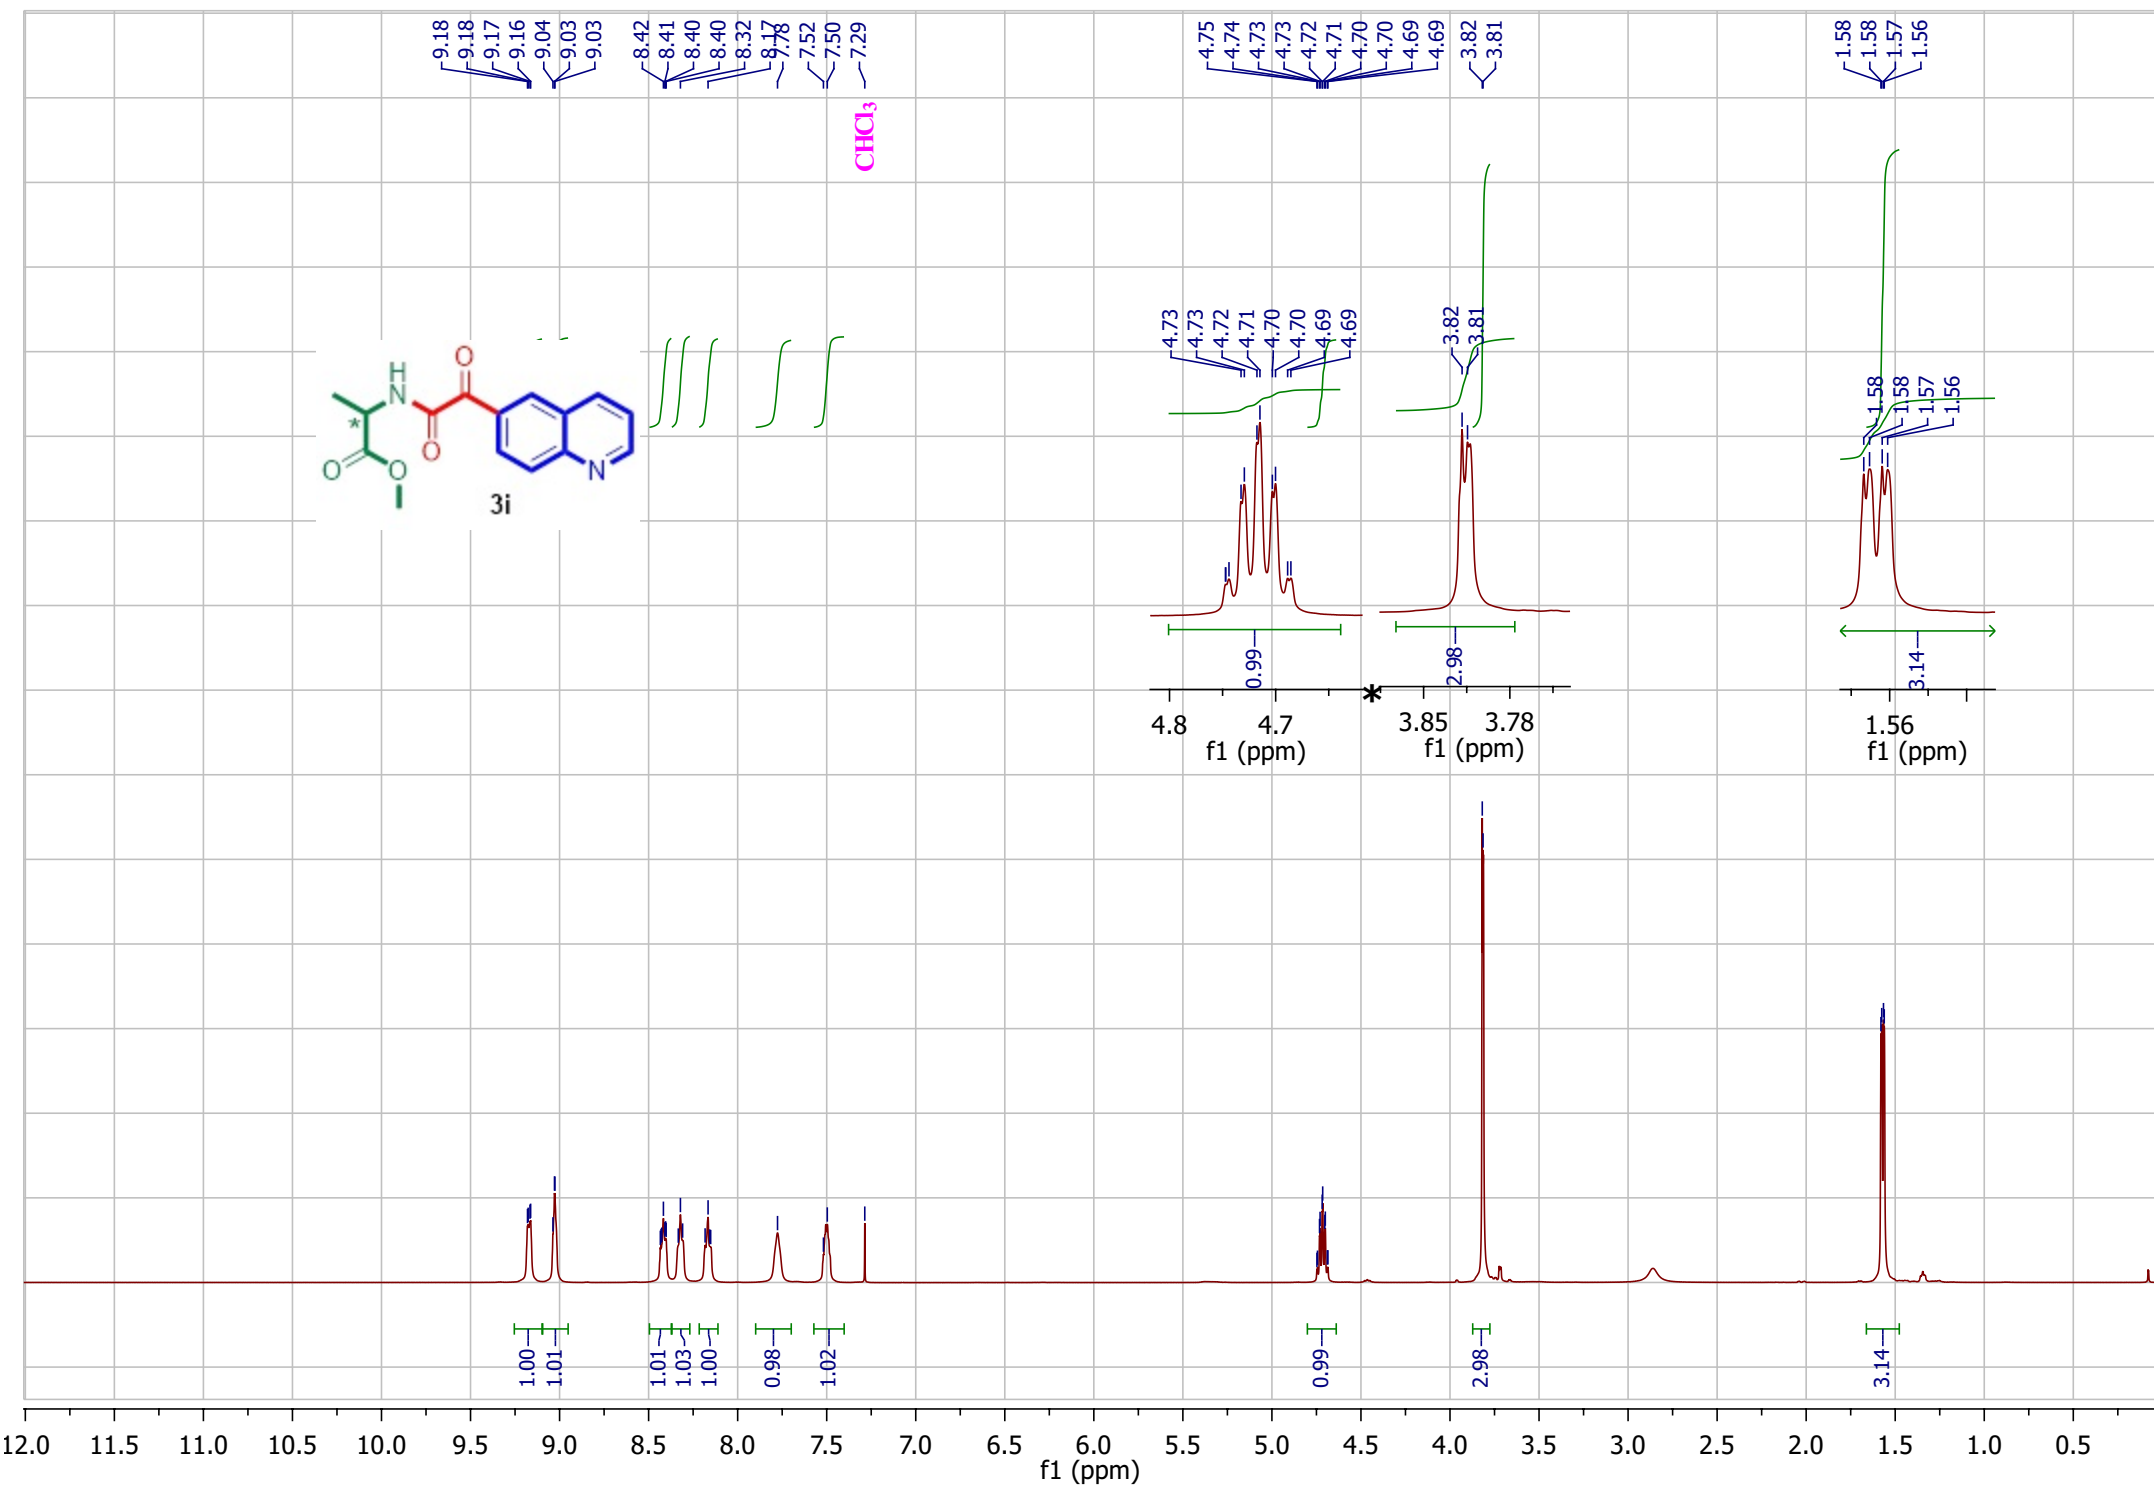

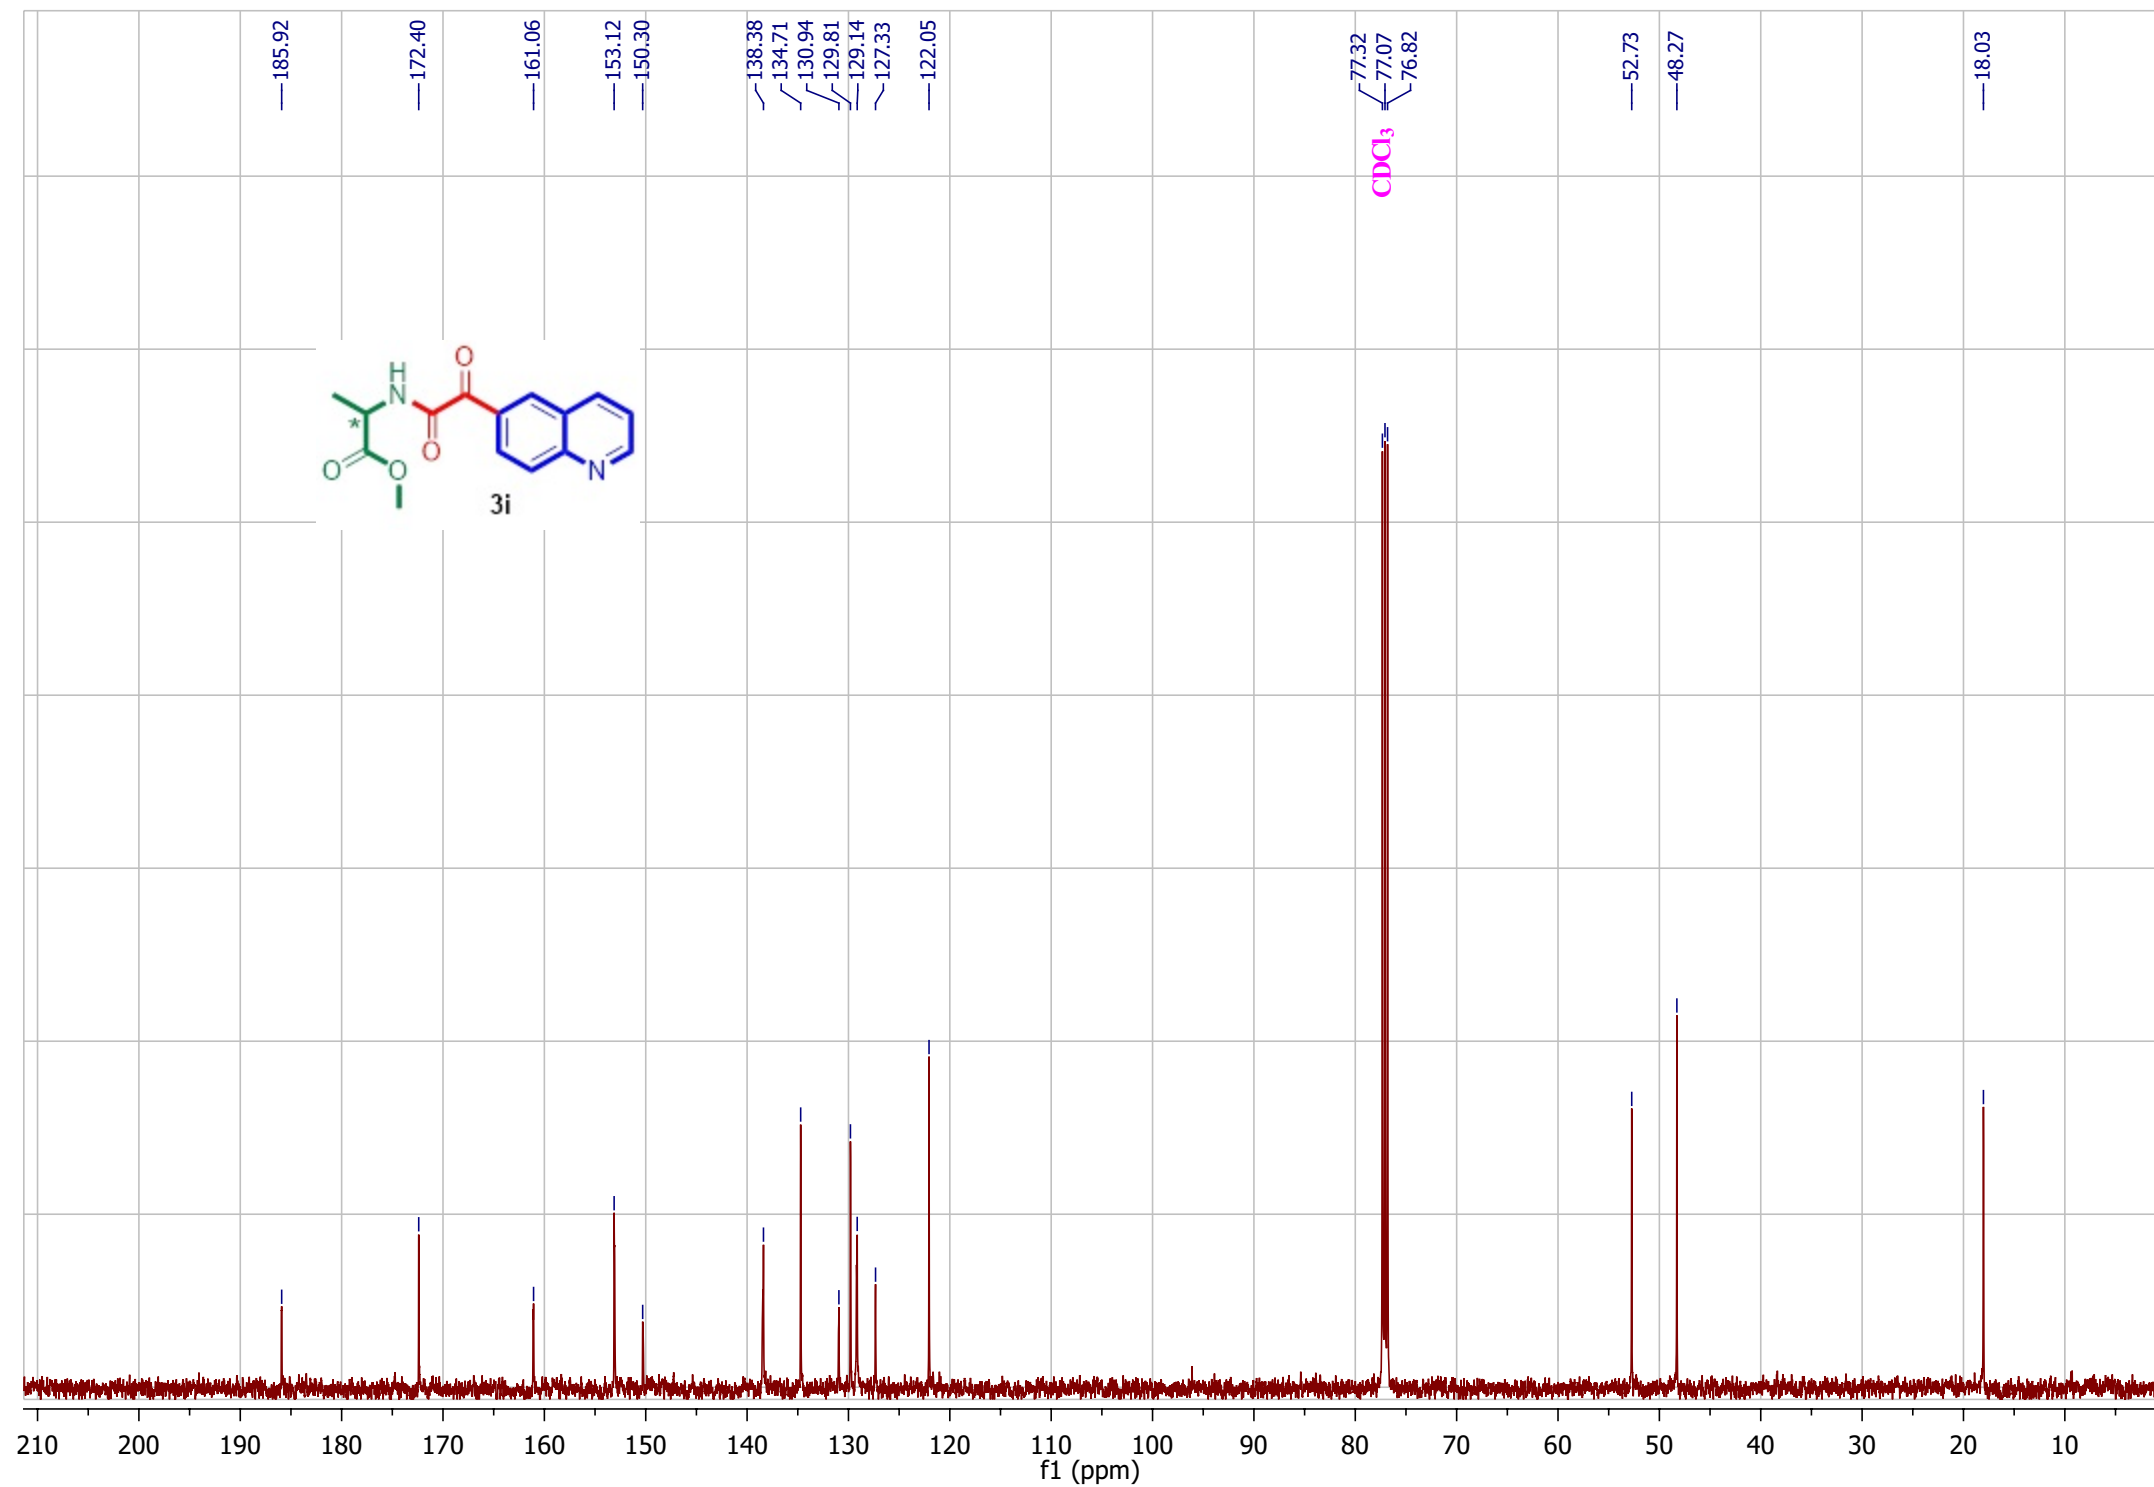

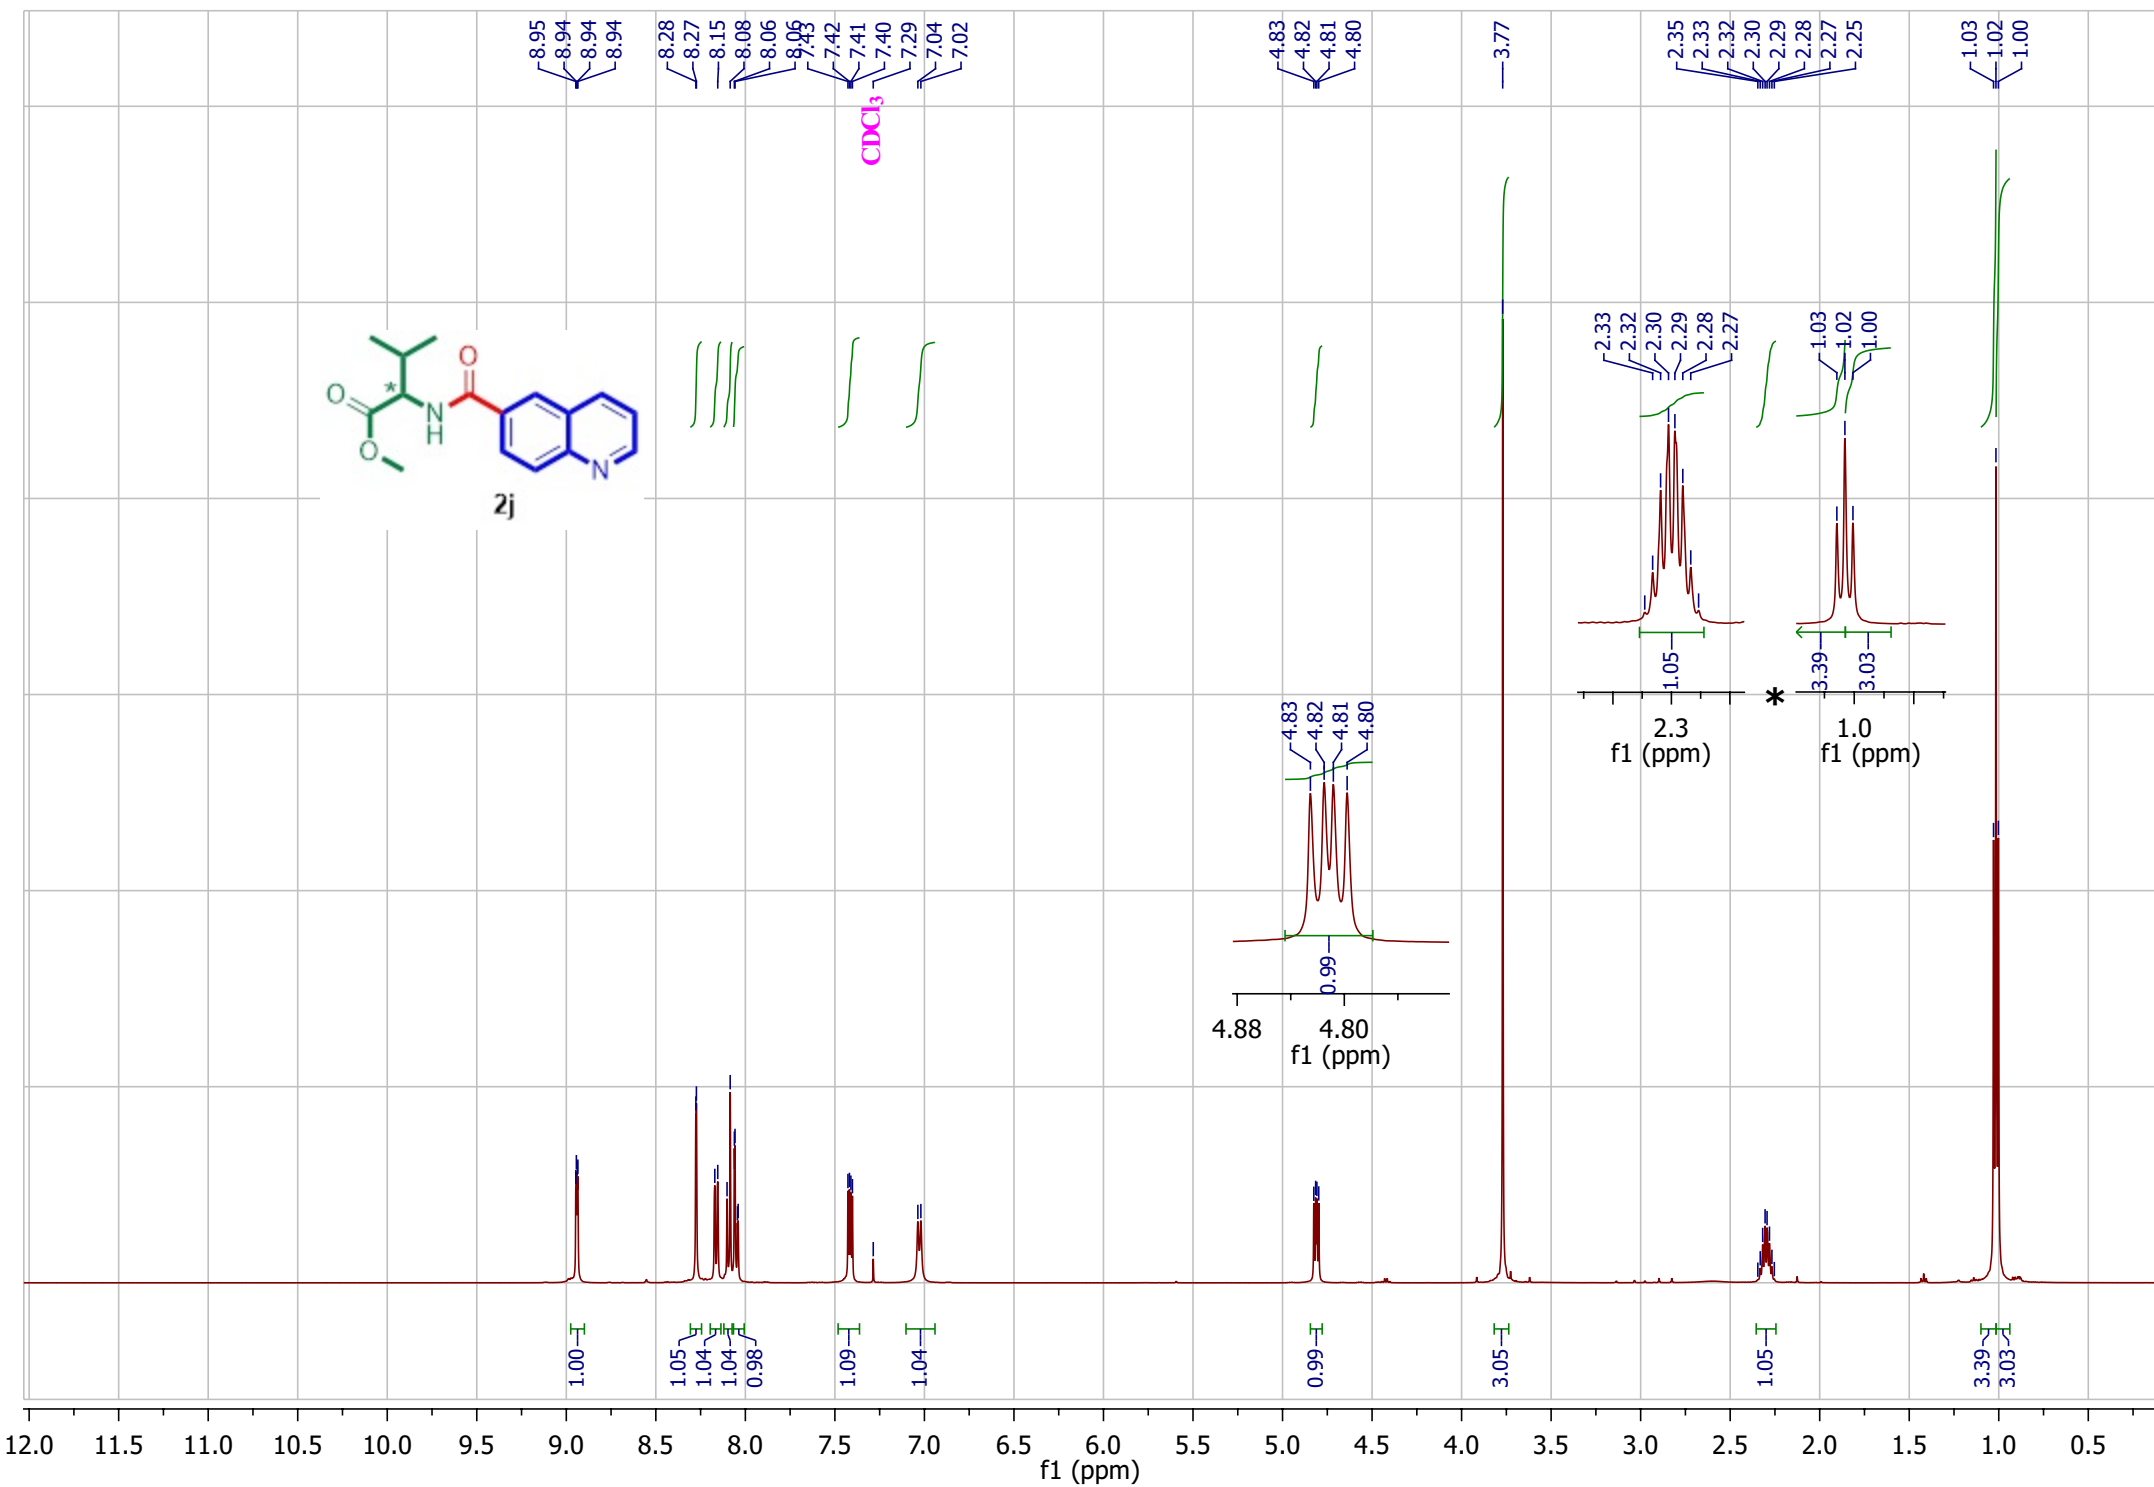



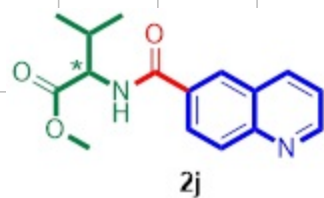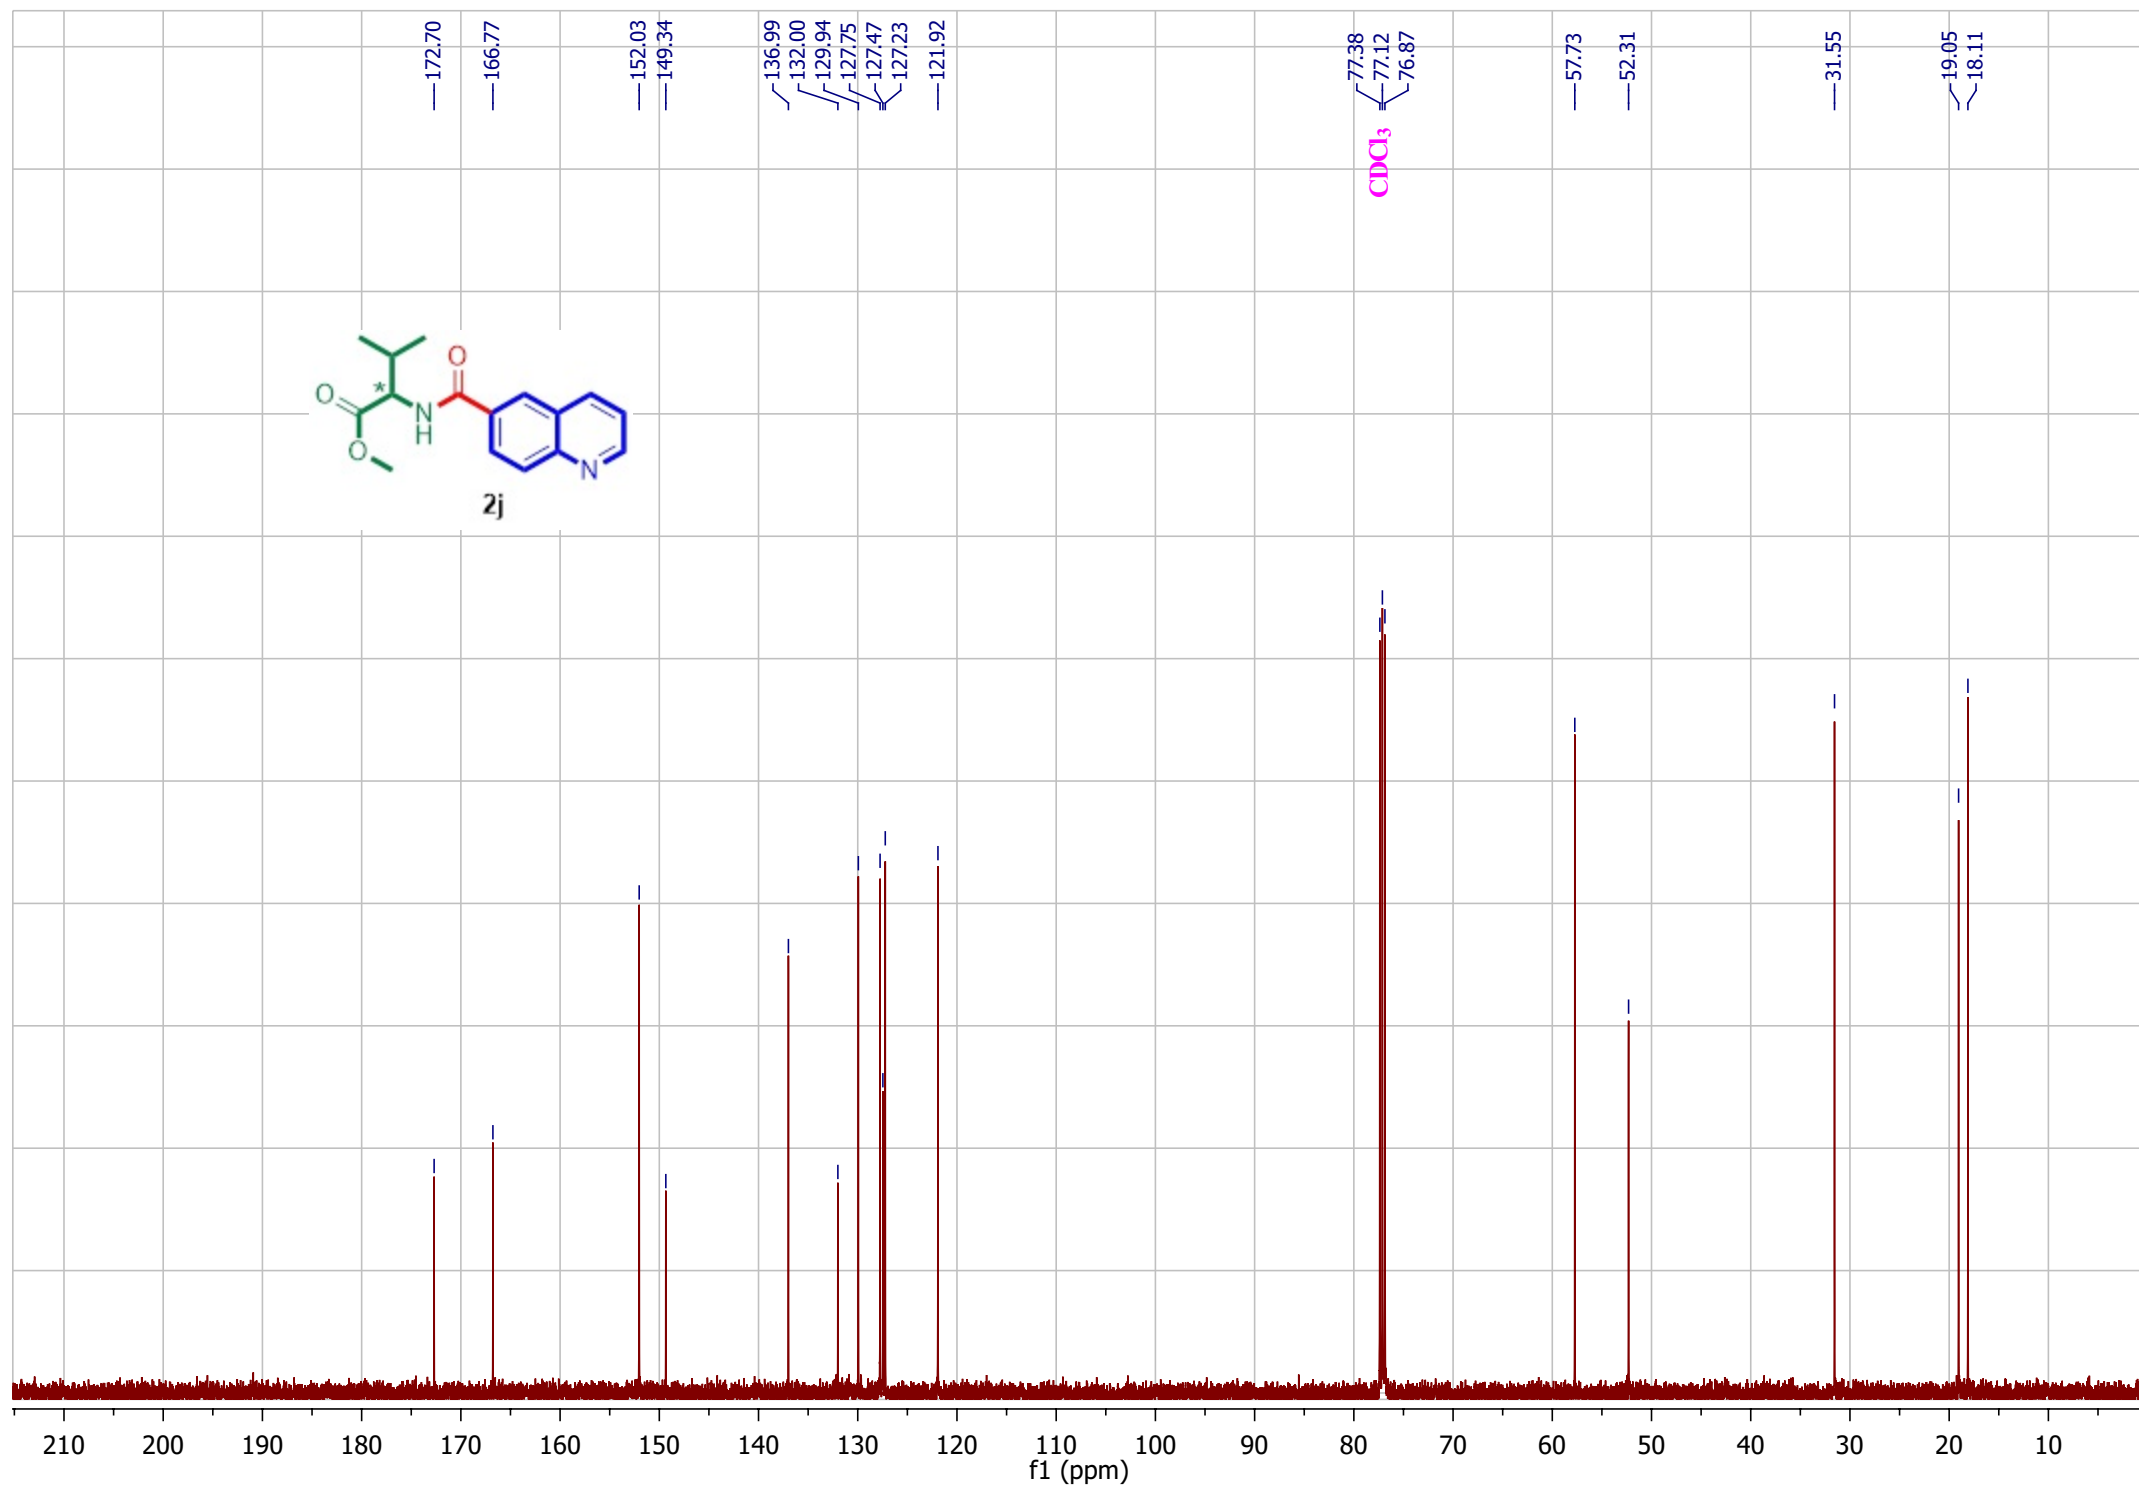

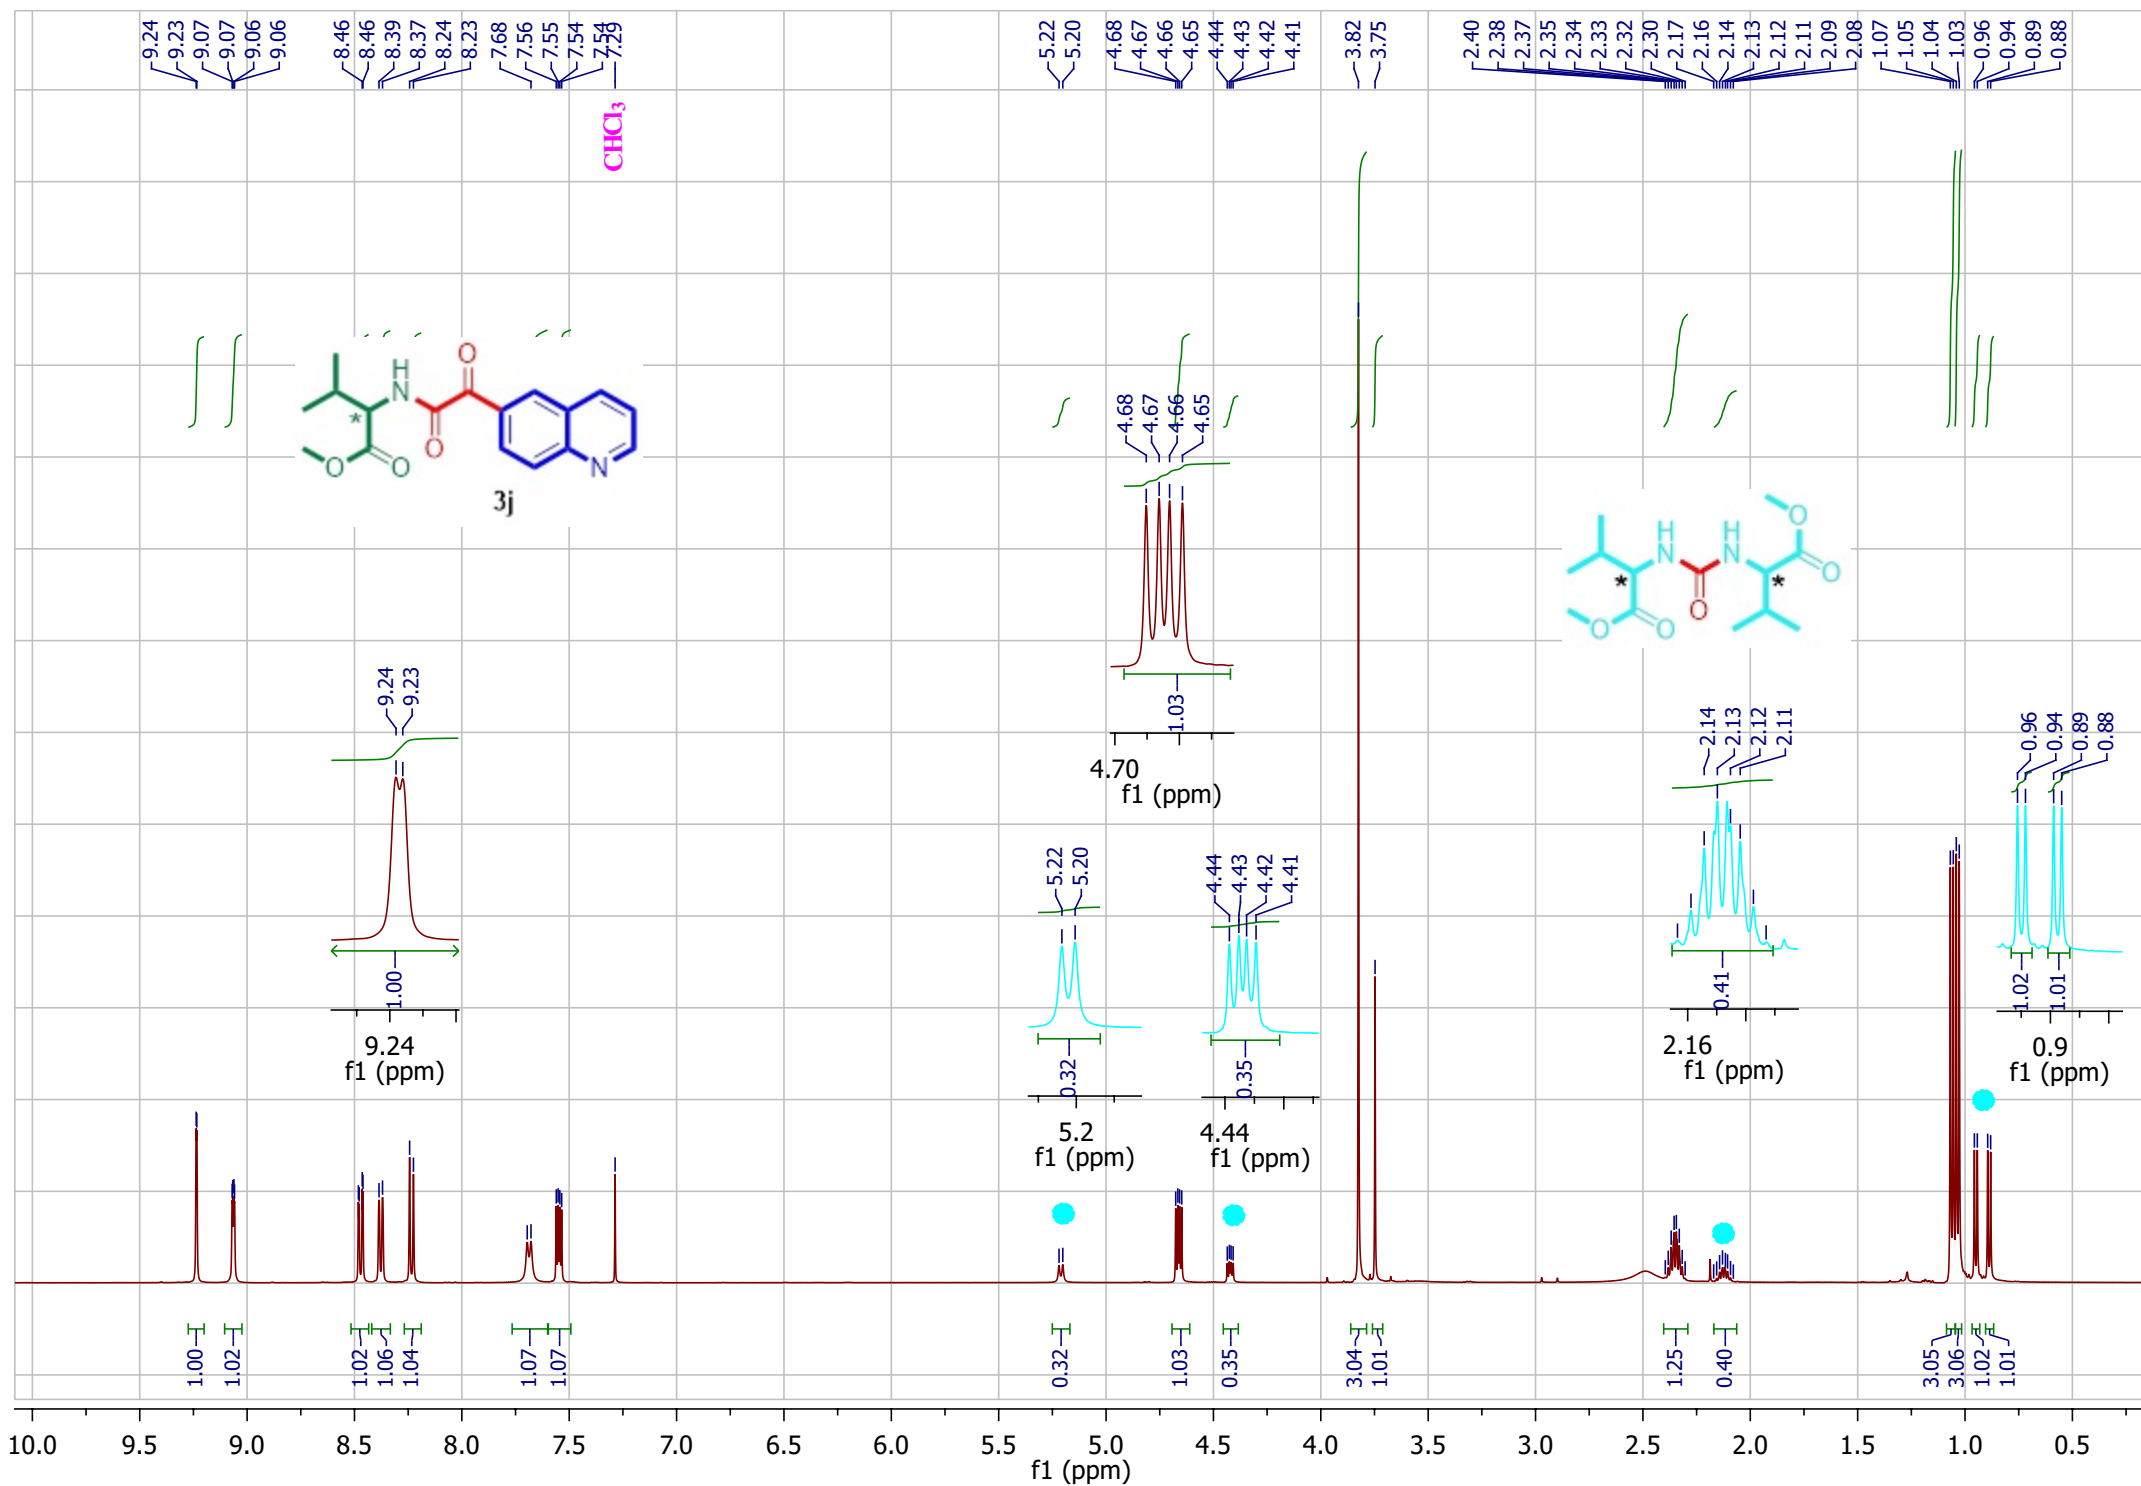

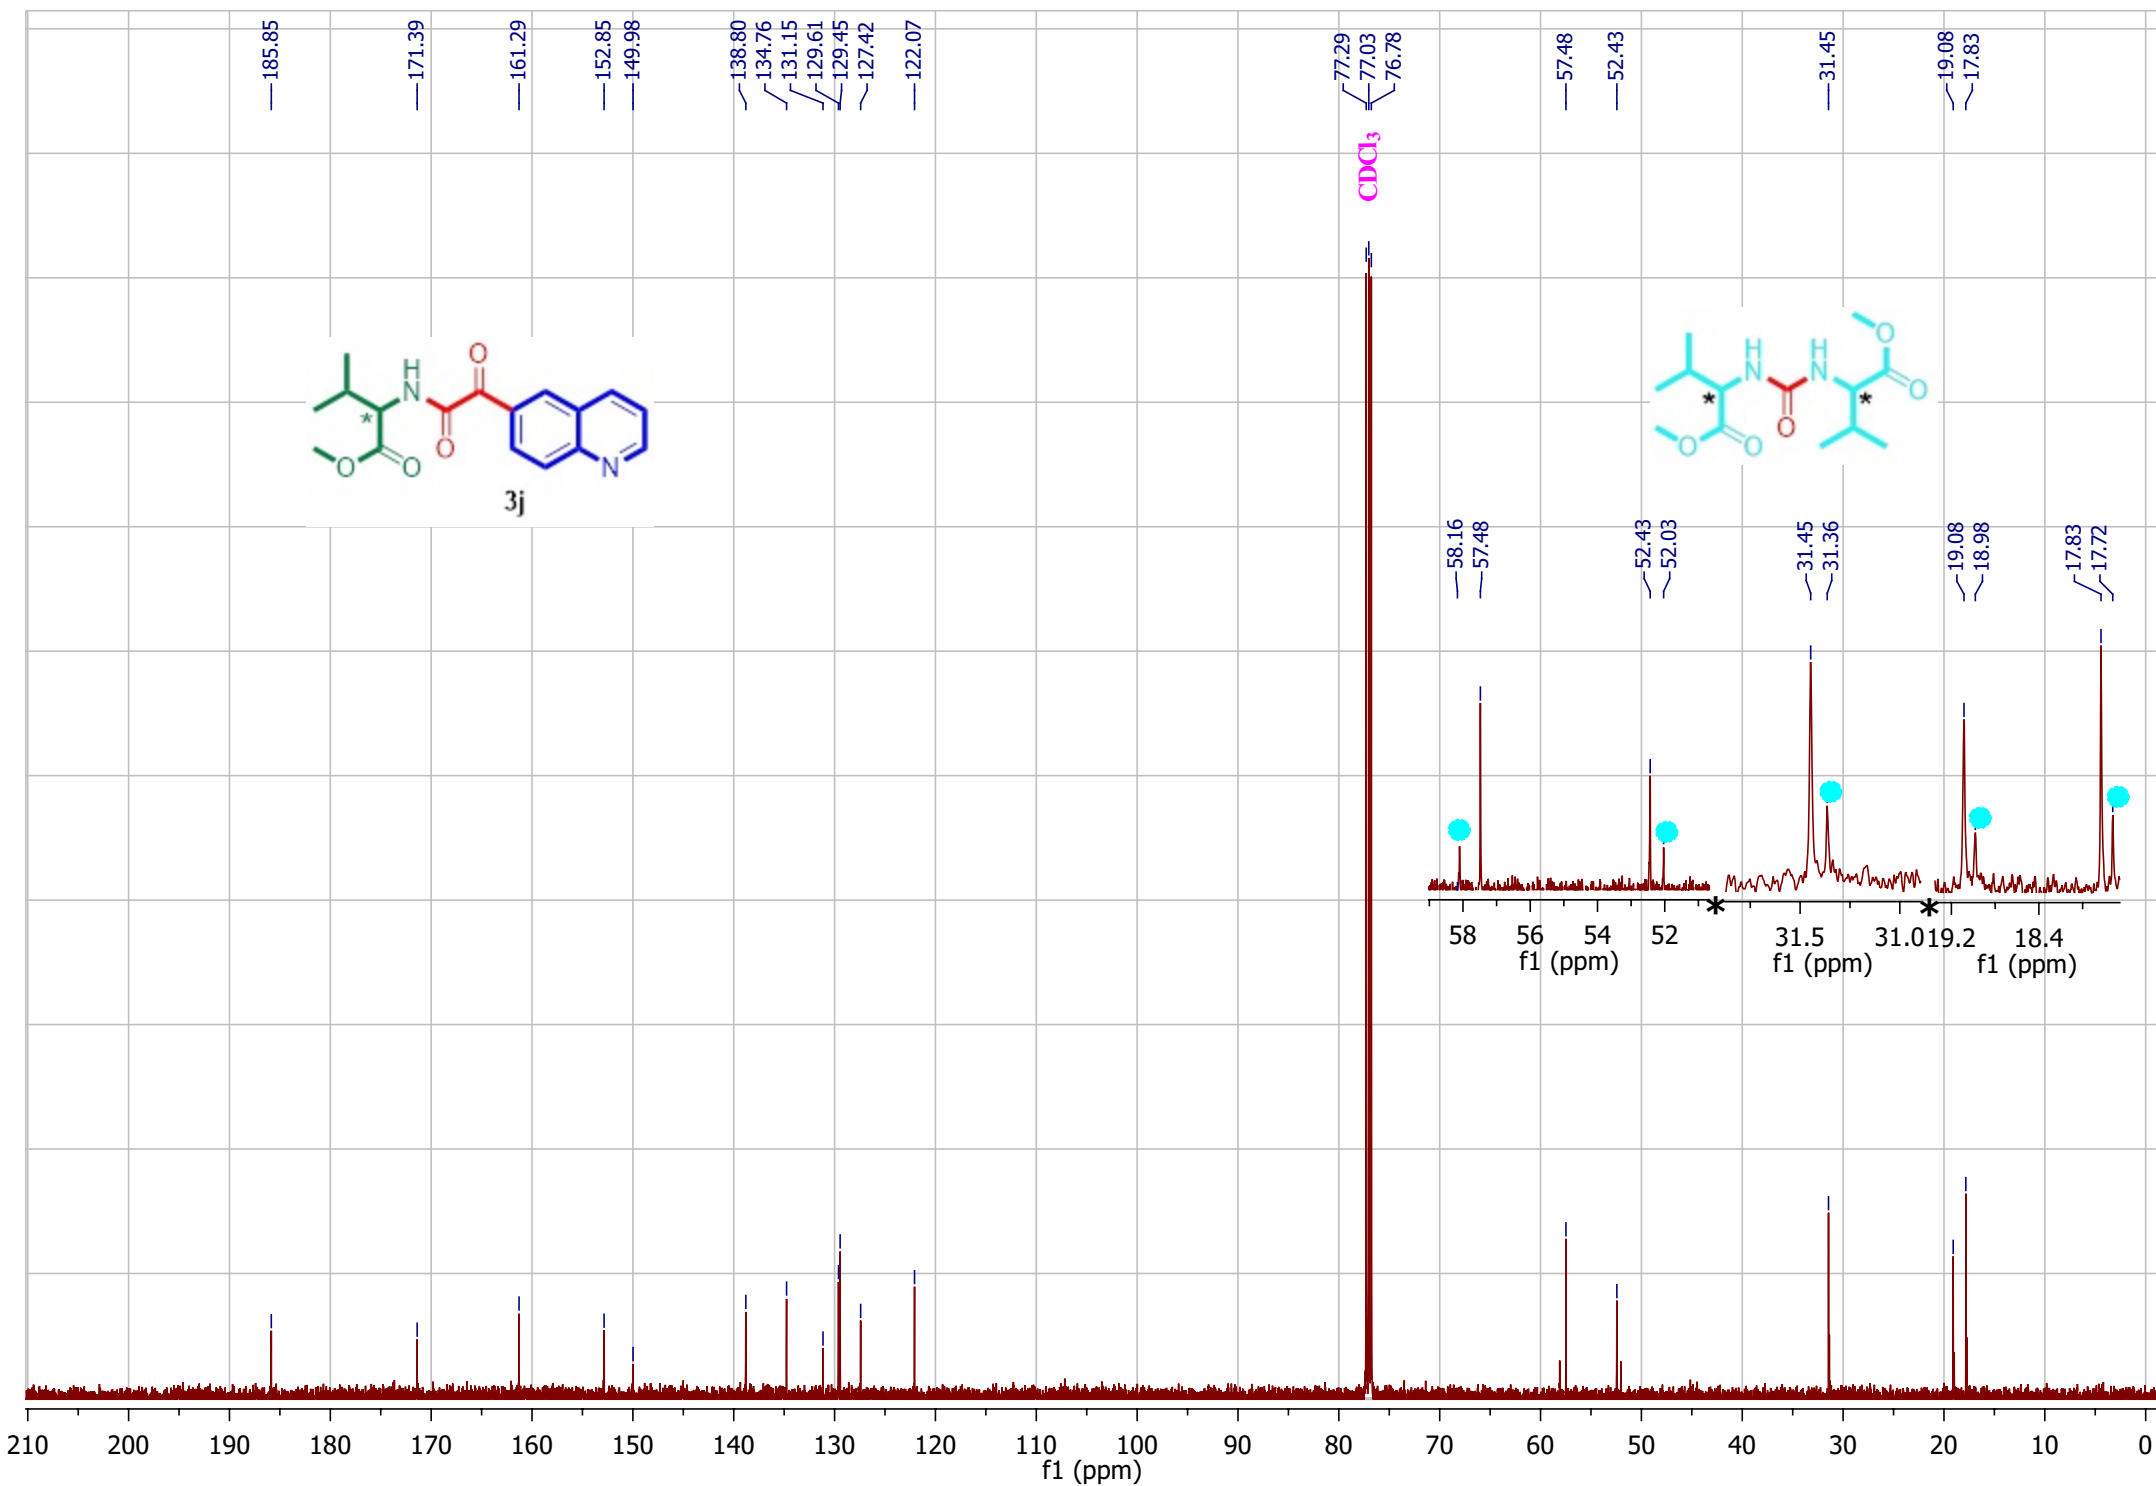

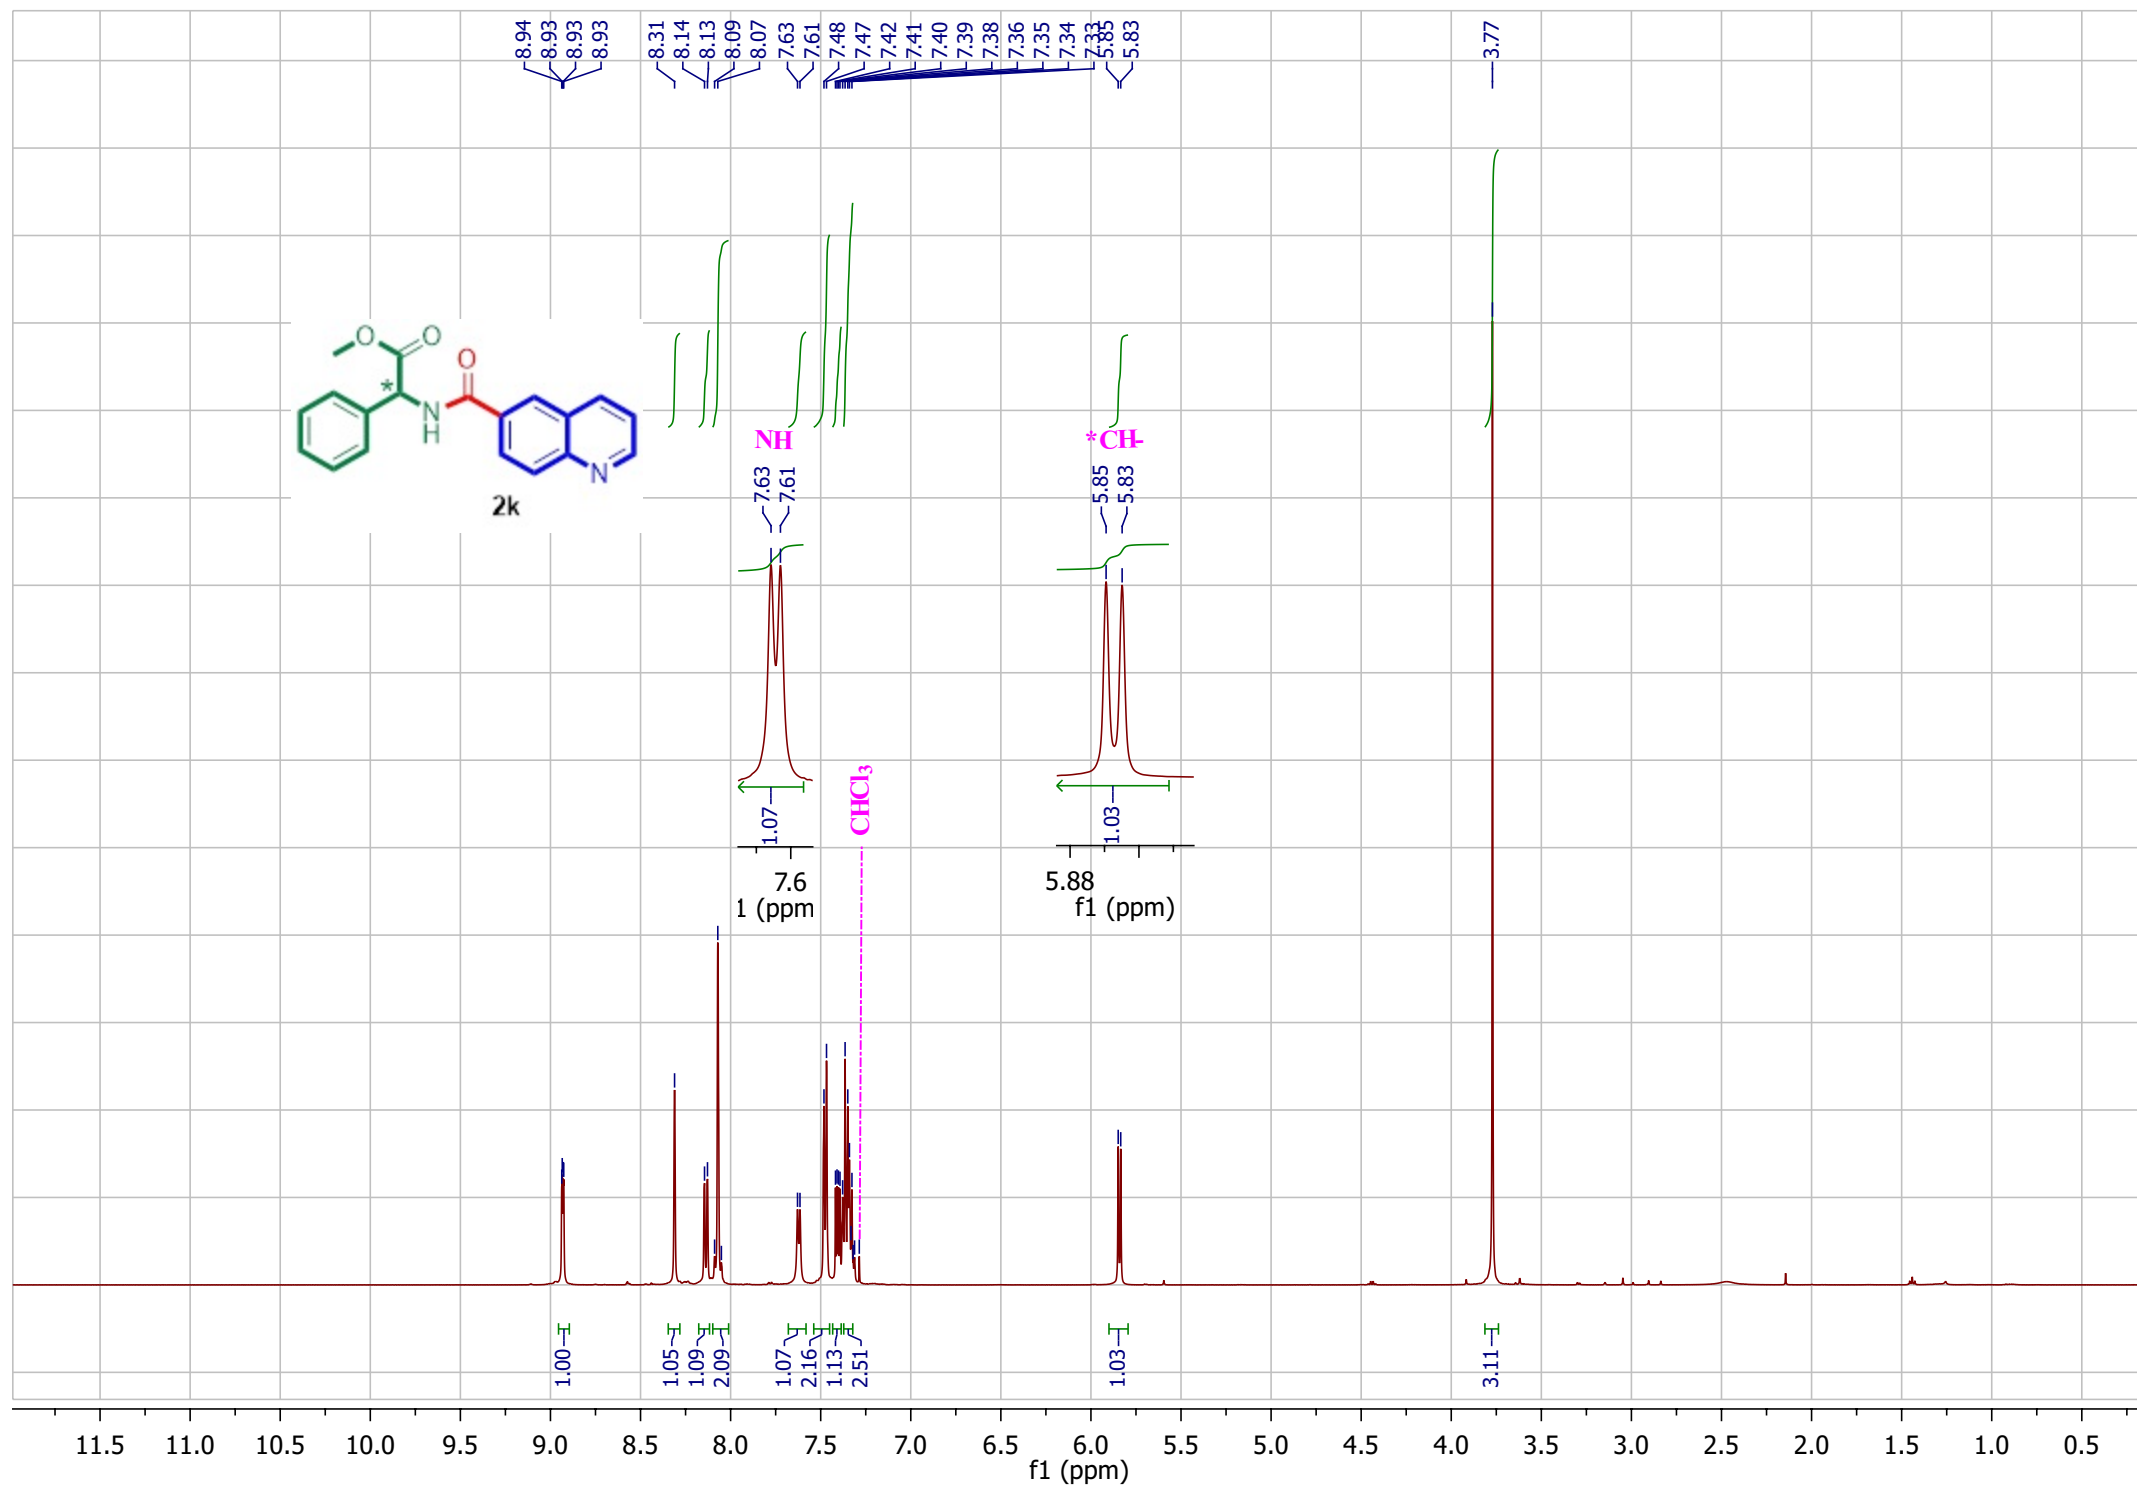

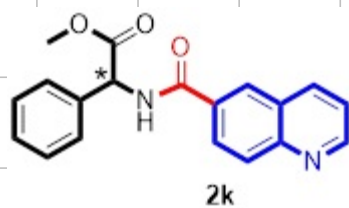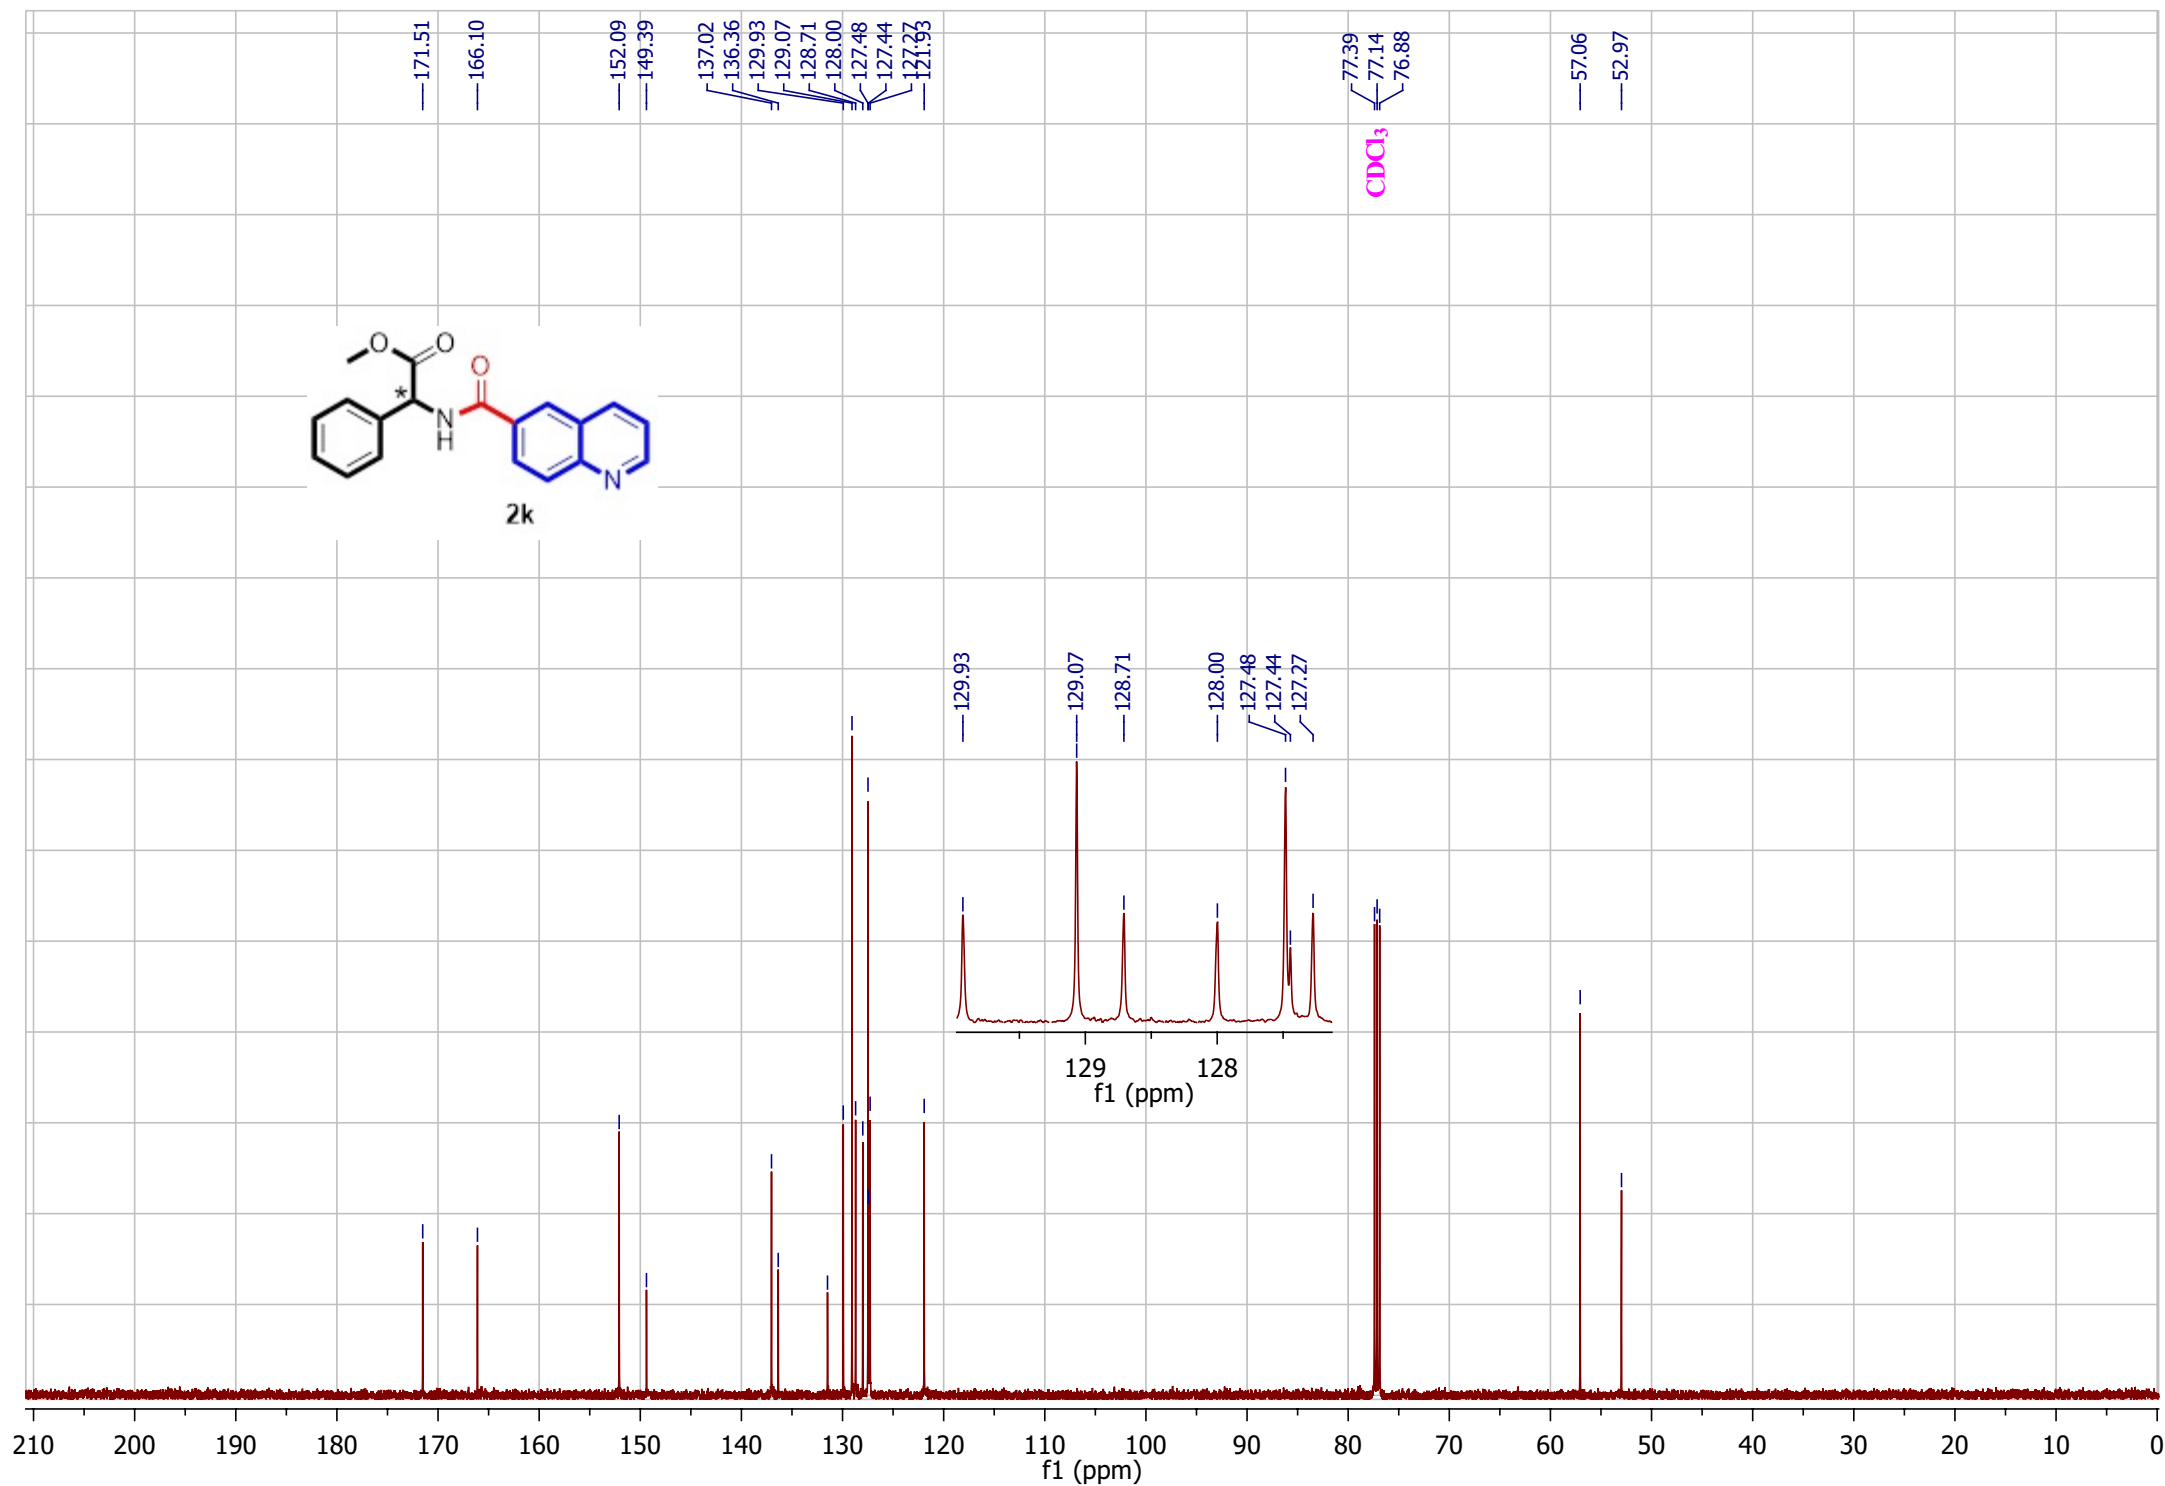

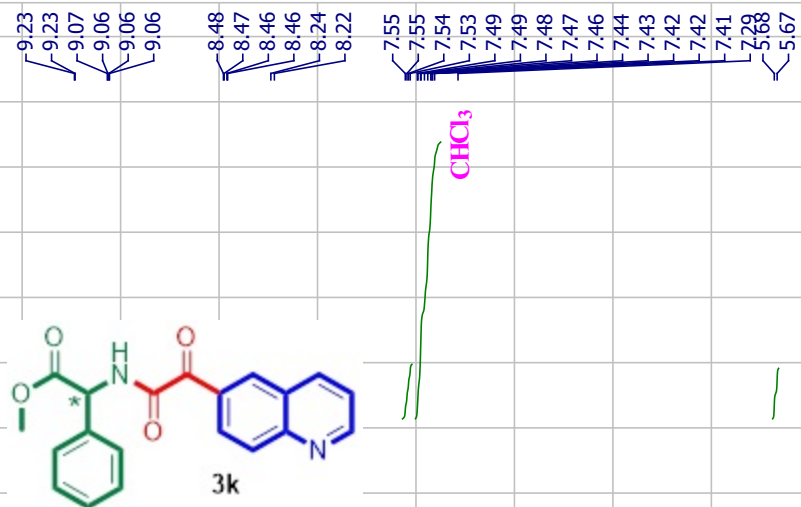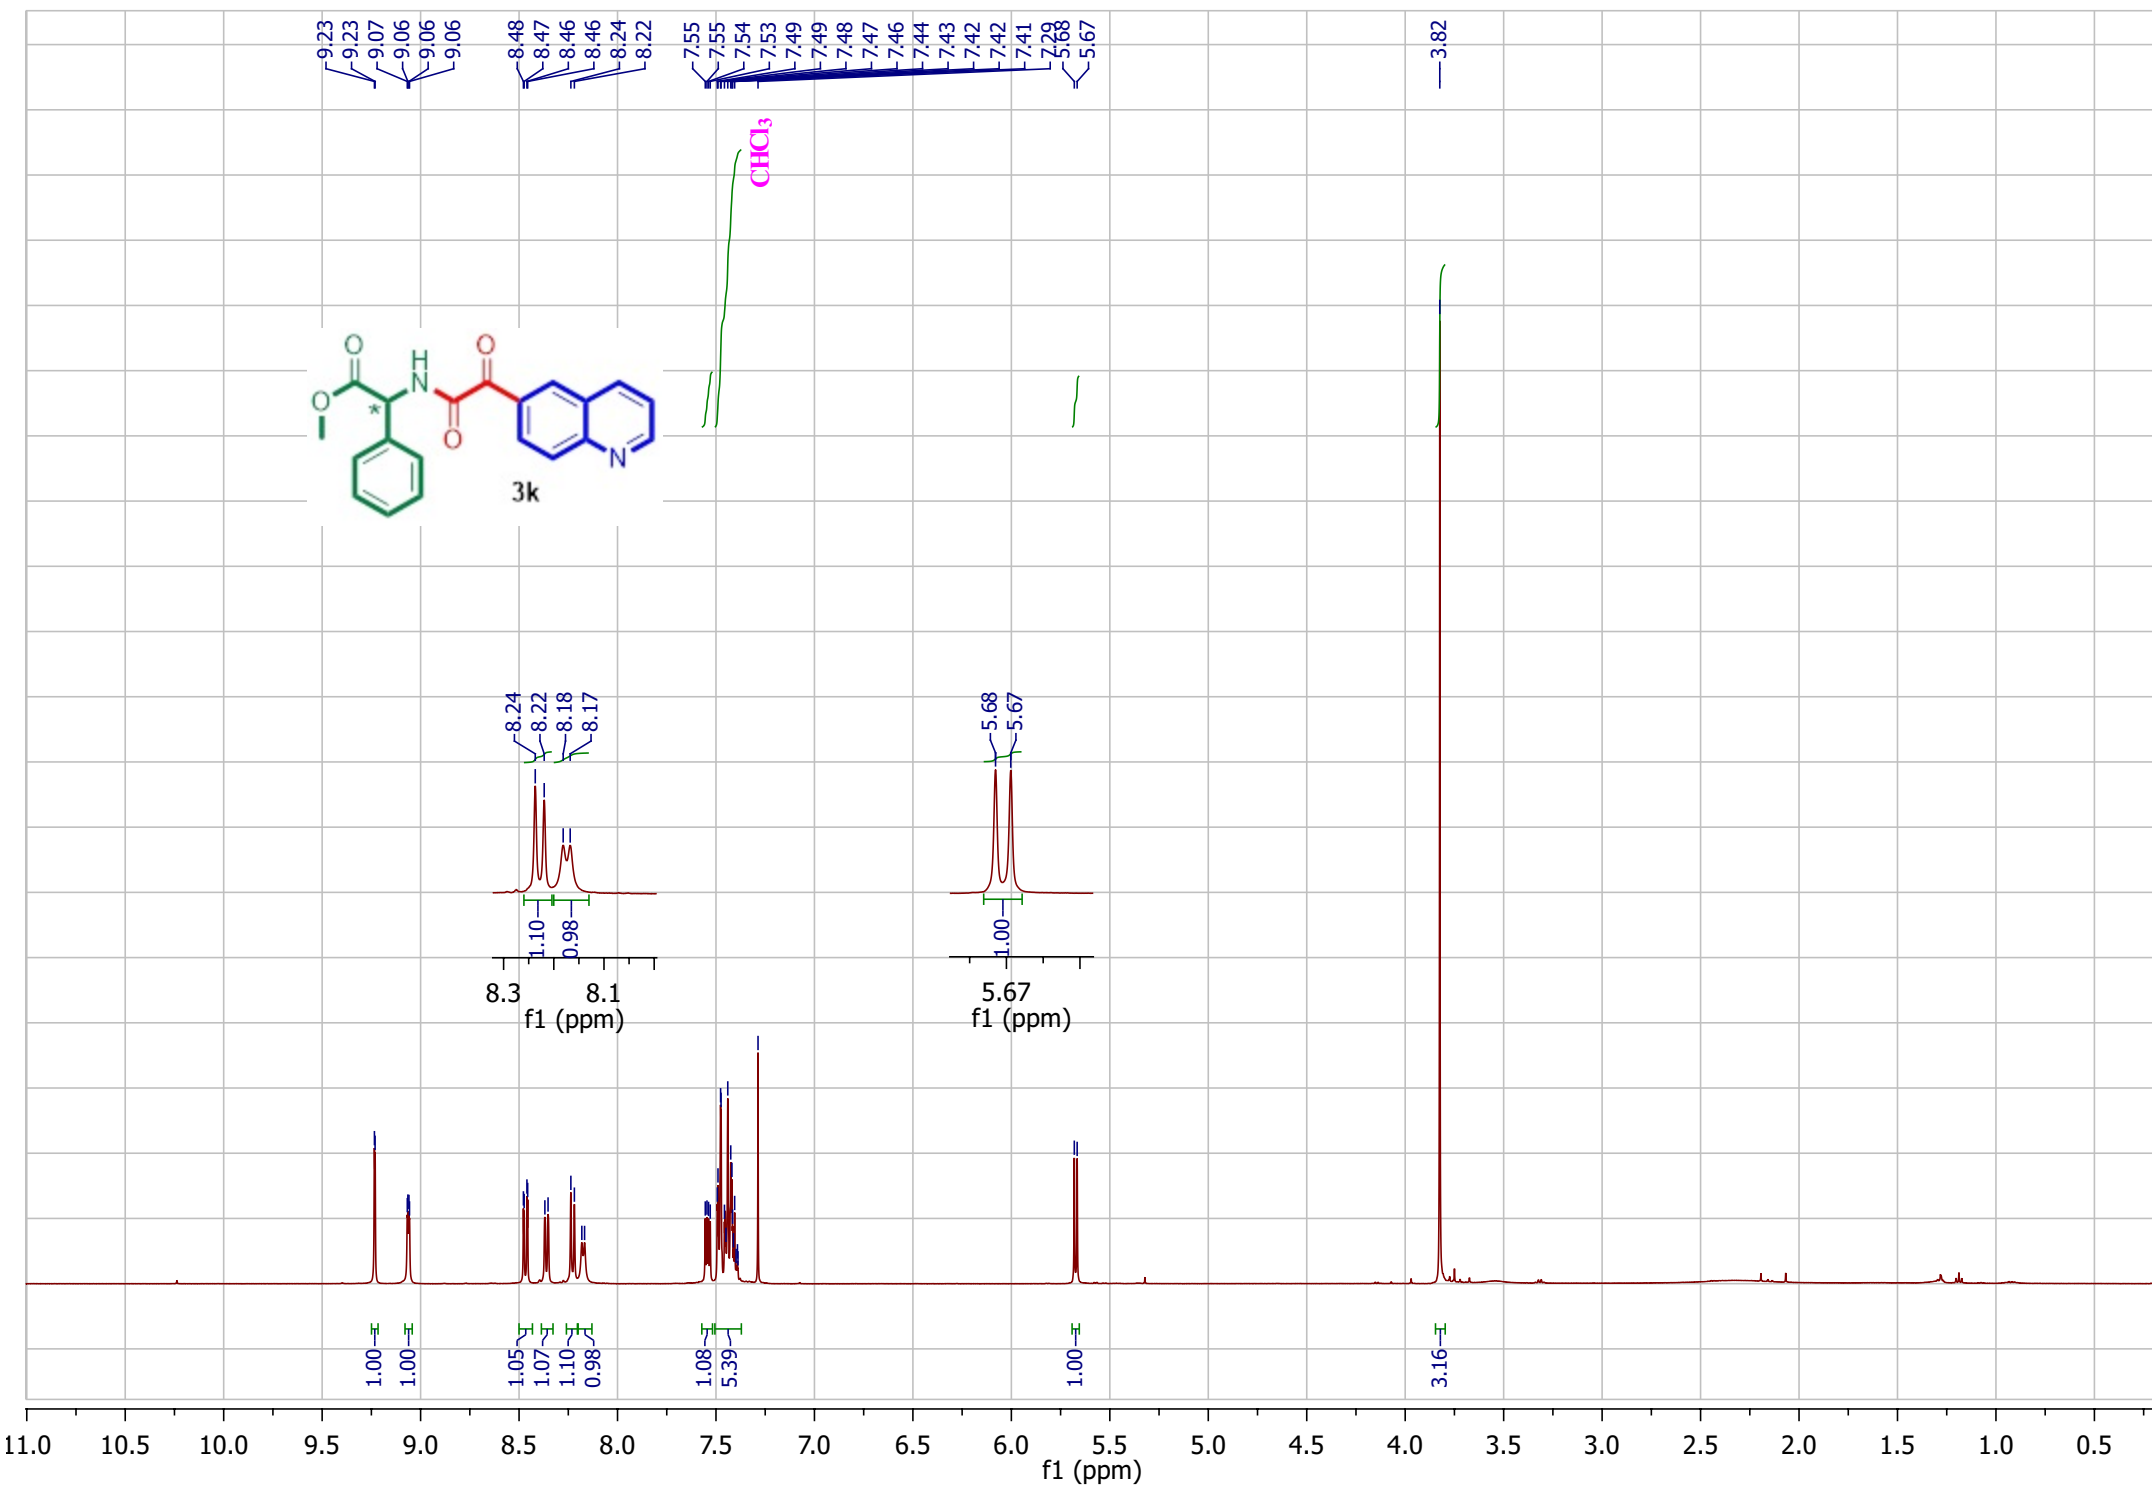

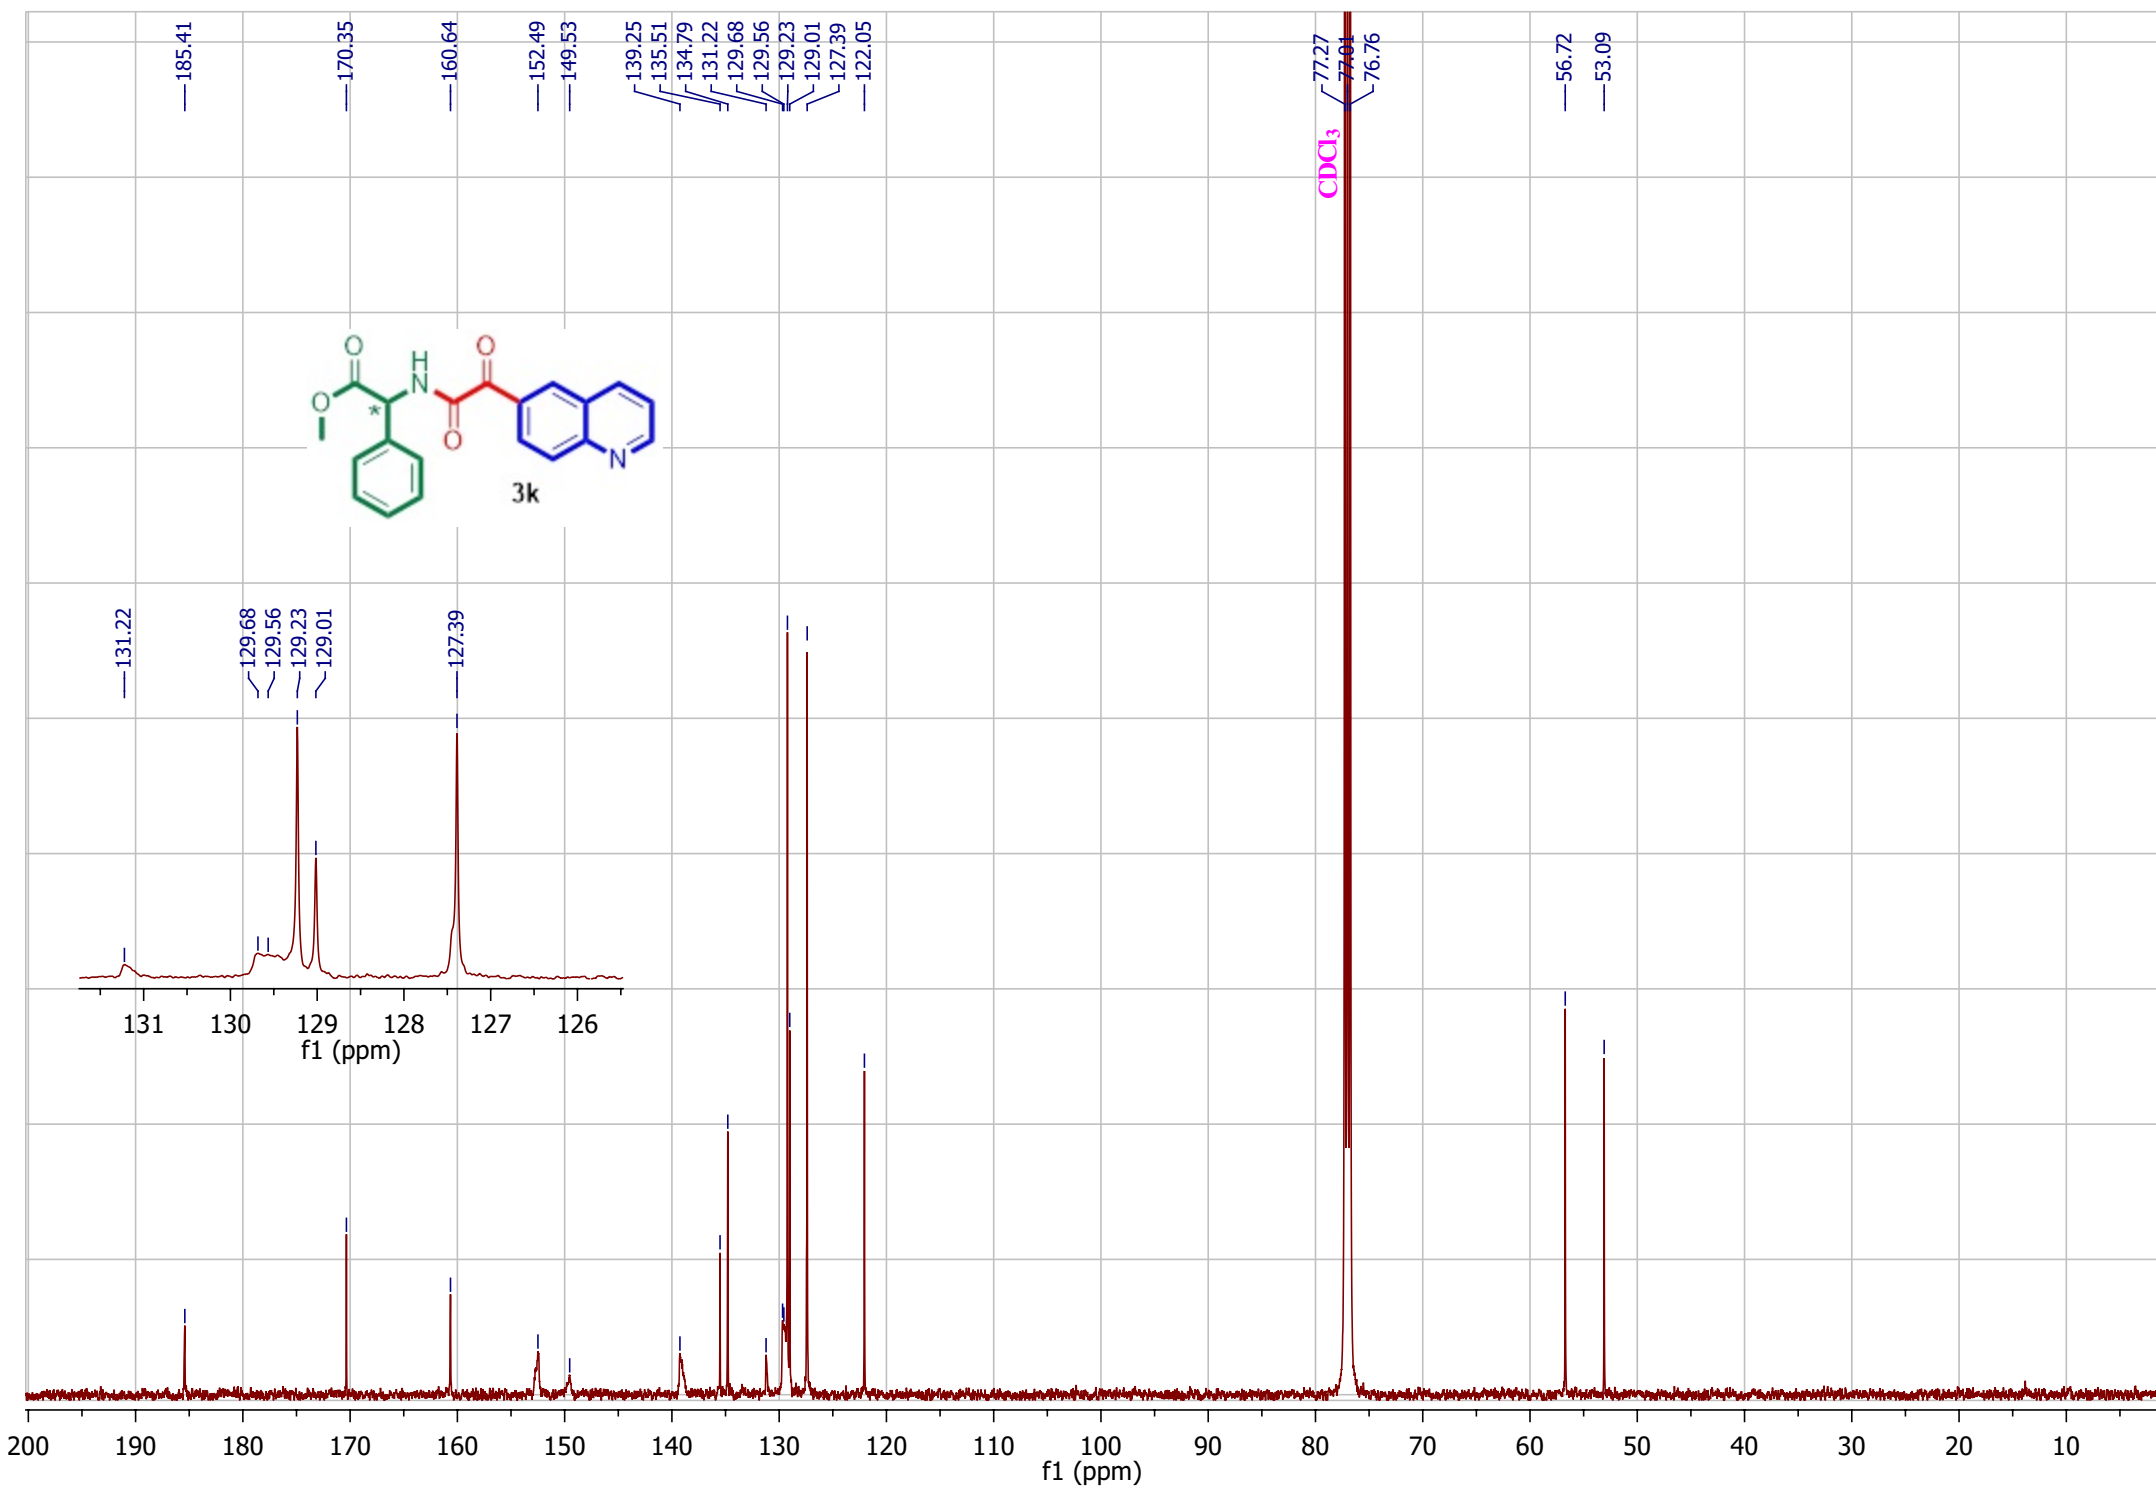

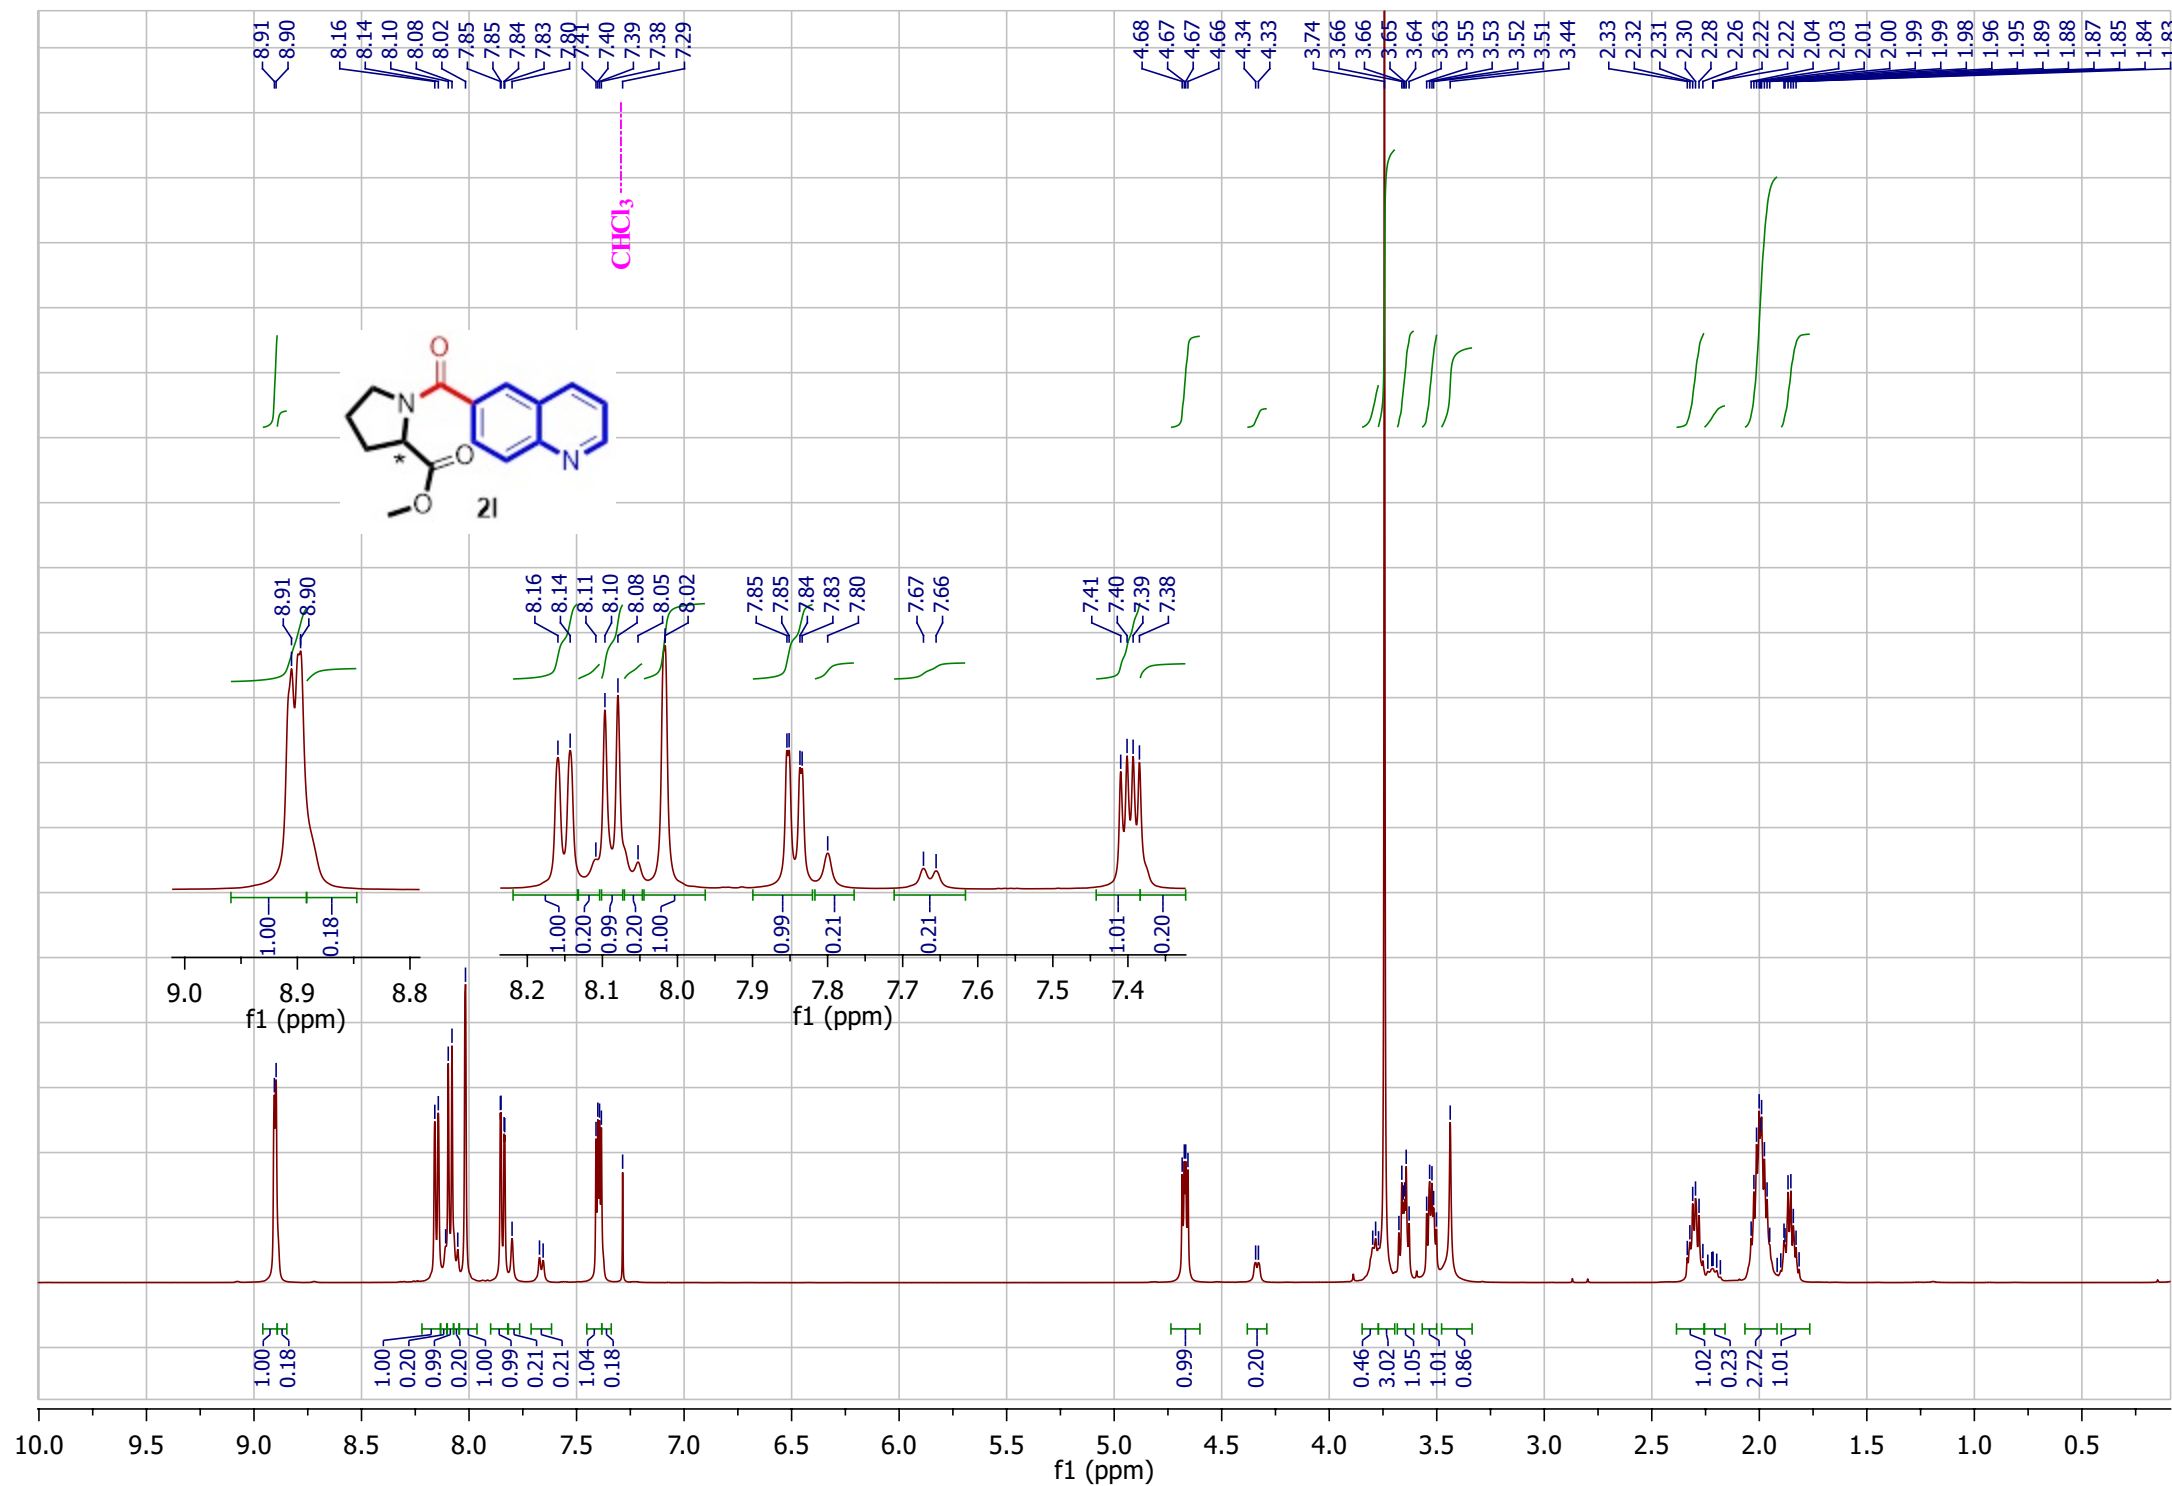



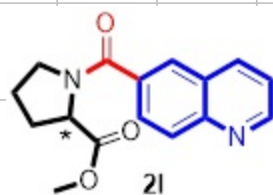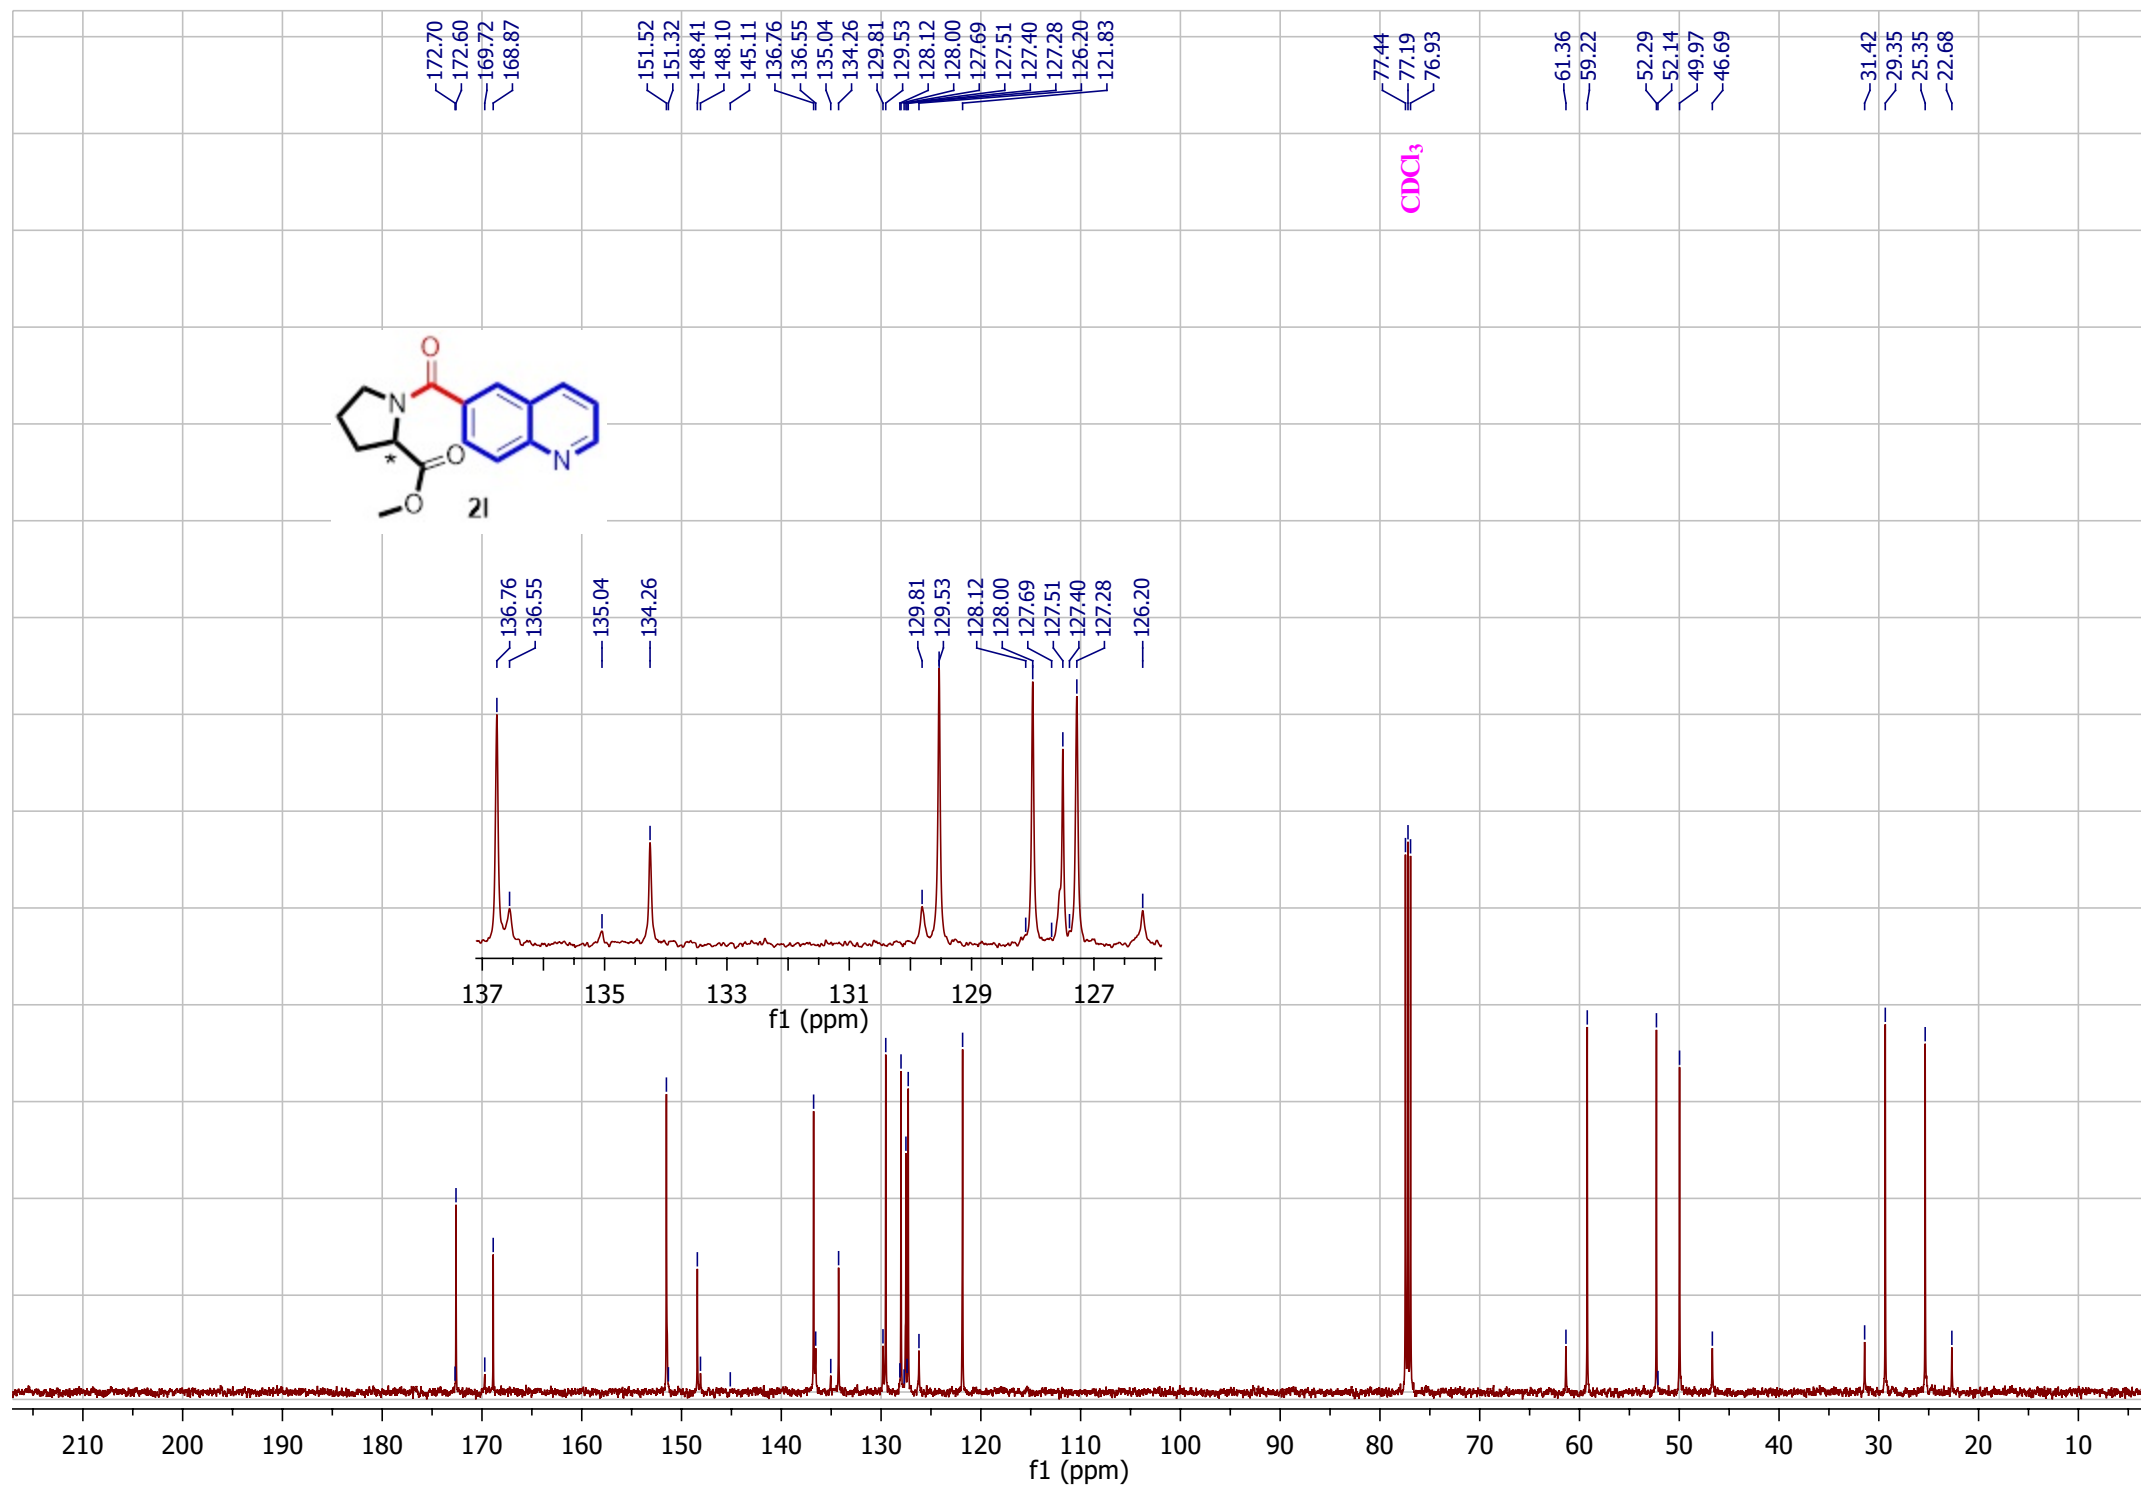

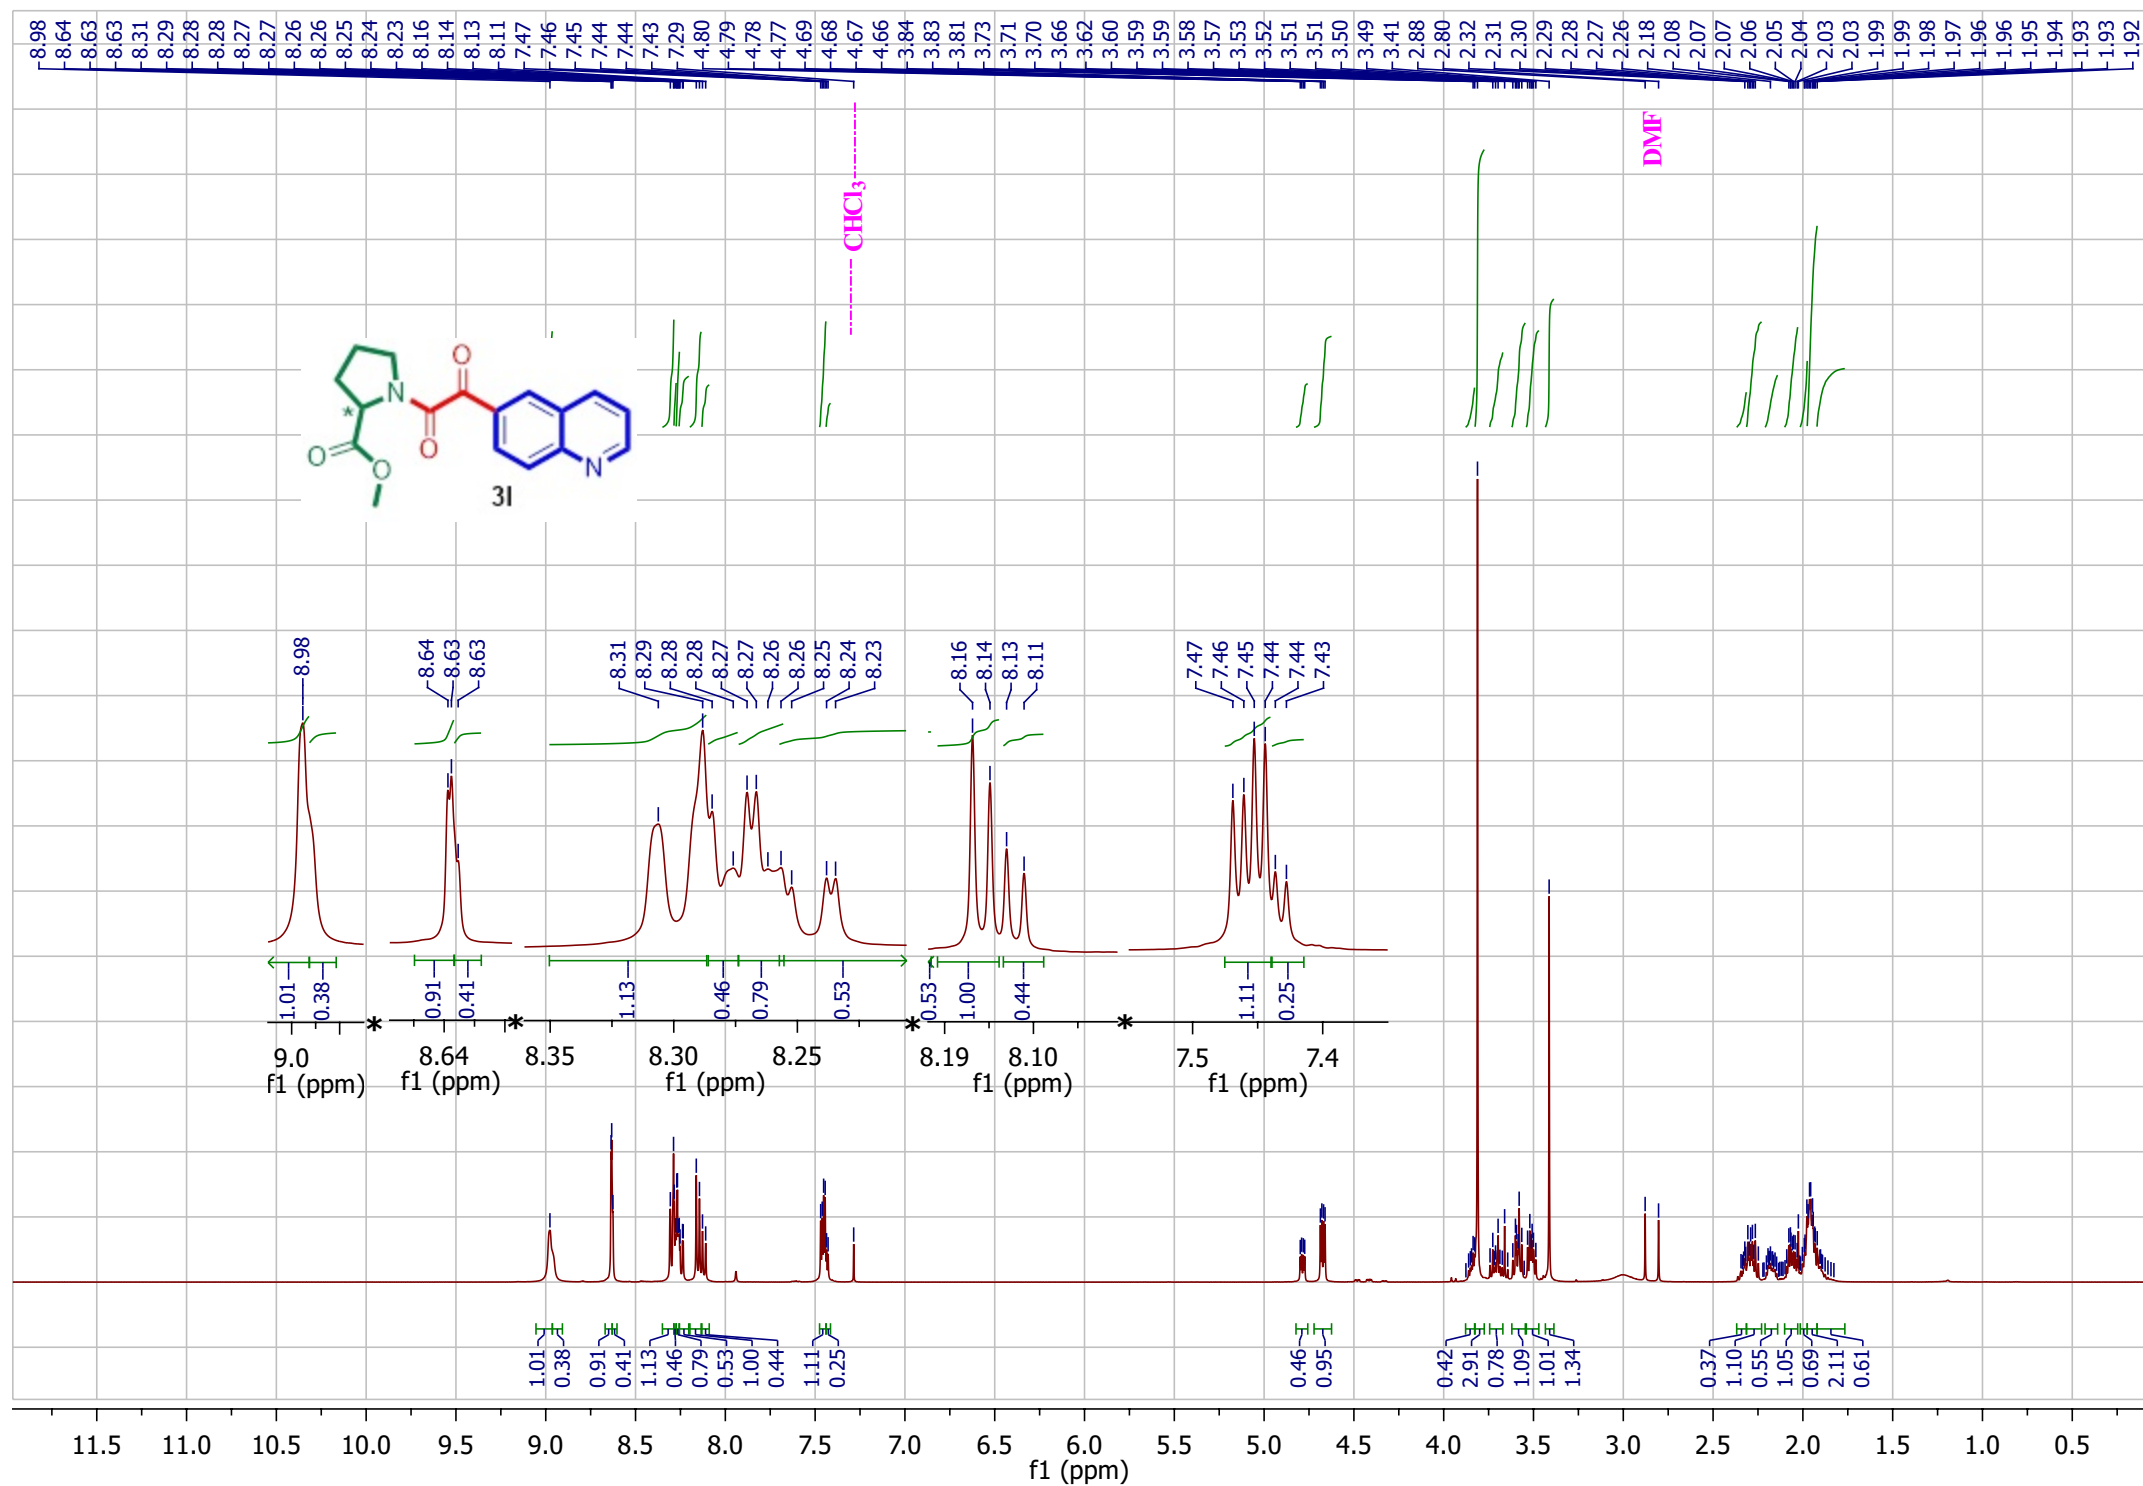

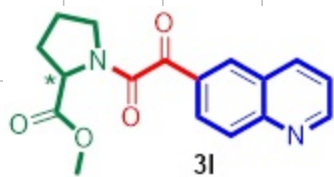

31

CDCl<sub>3</sub>

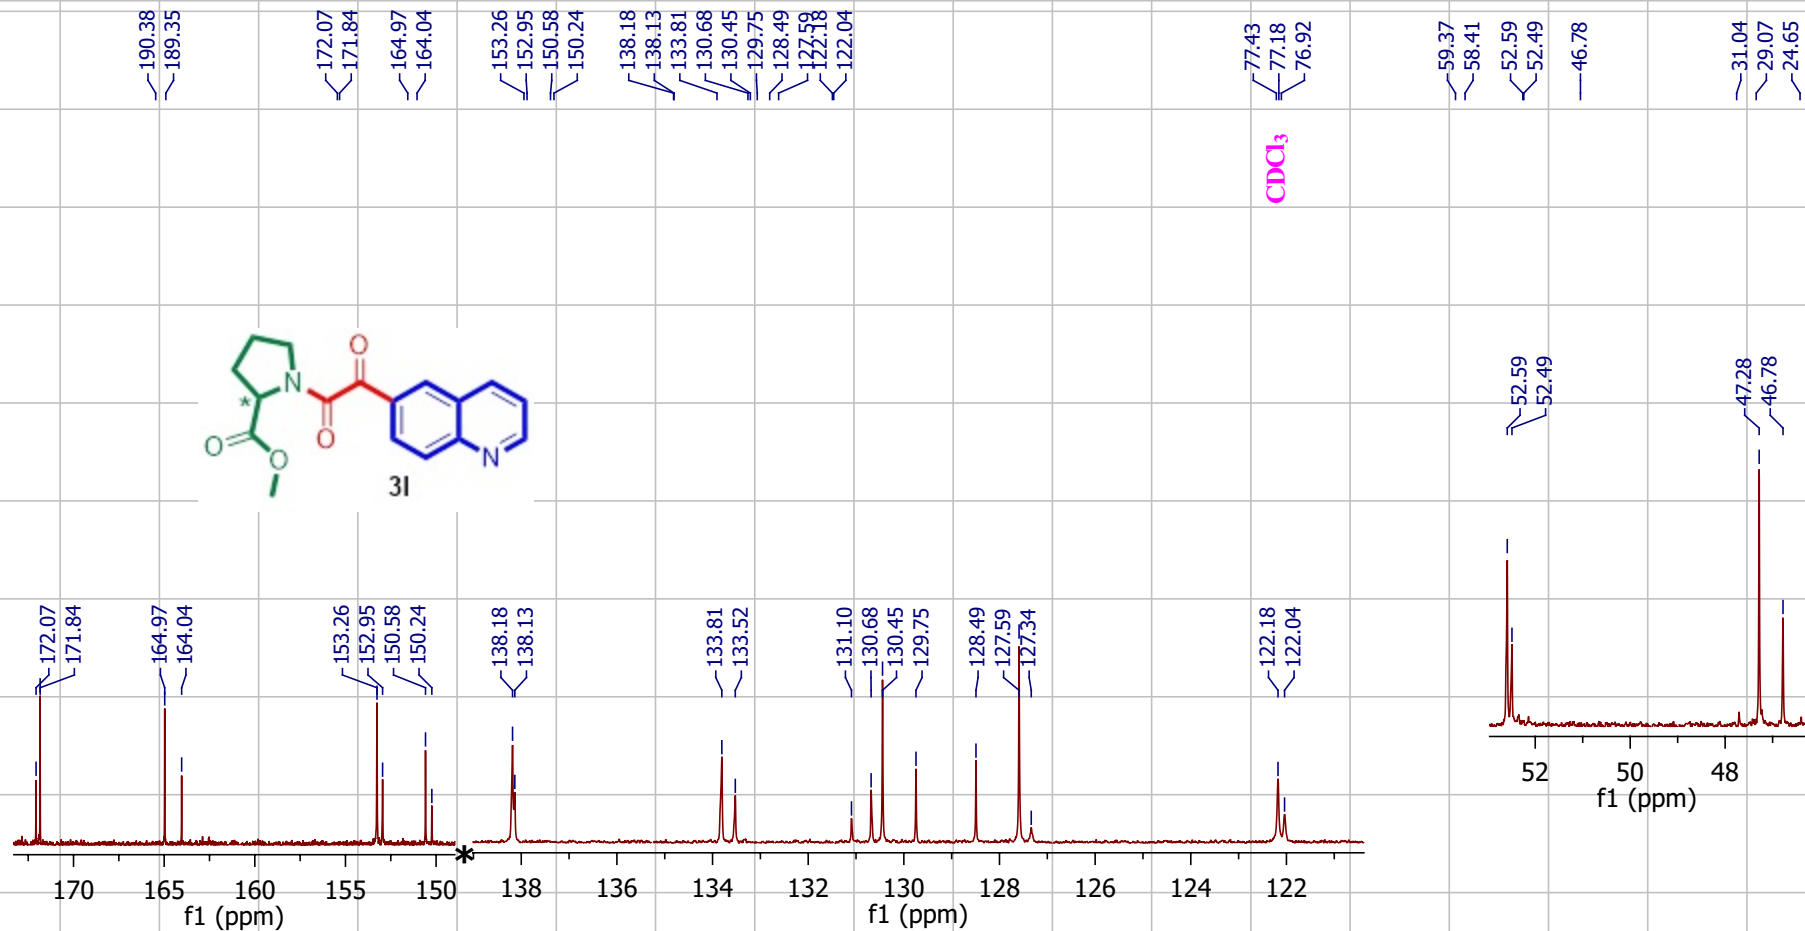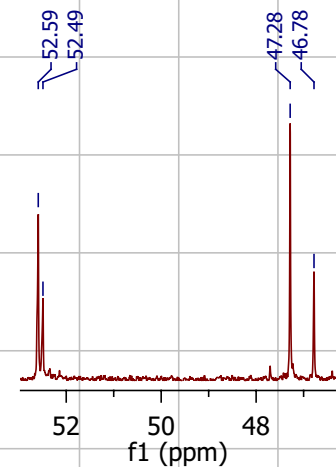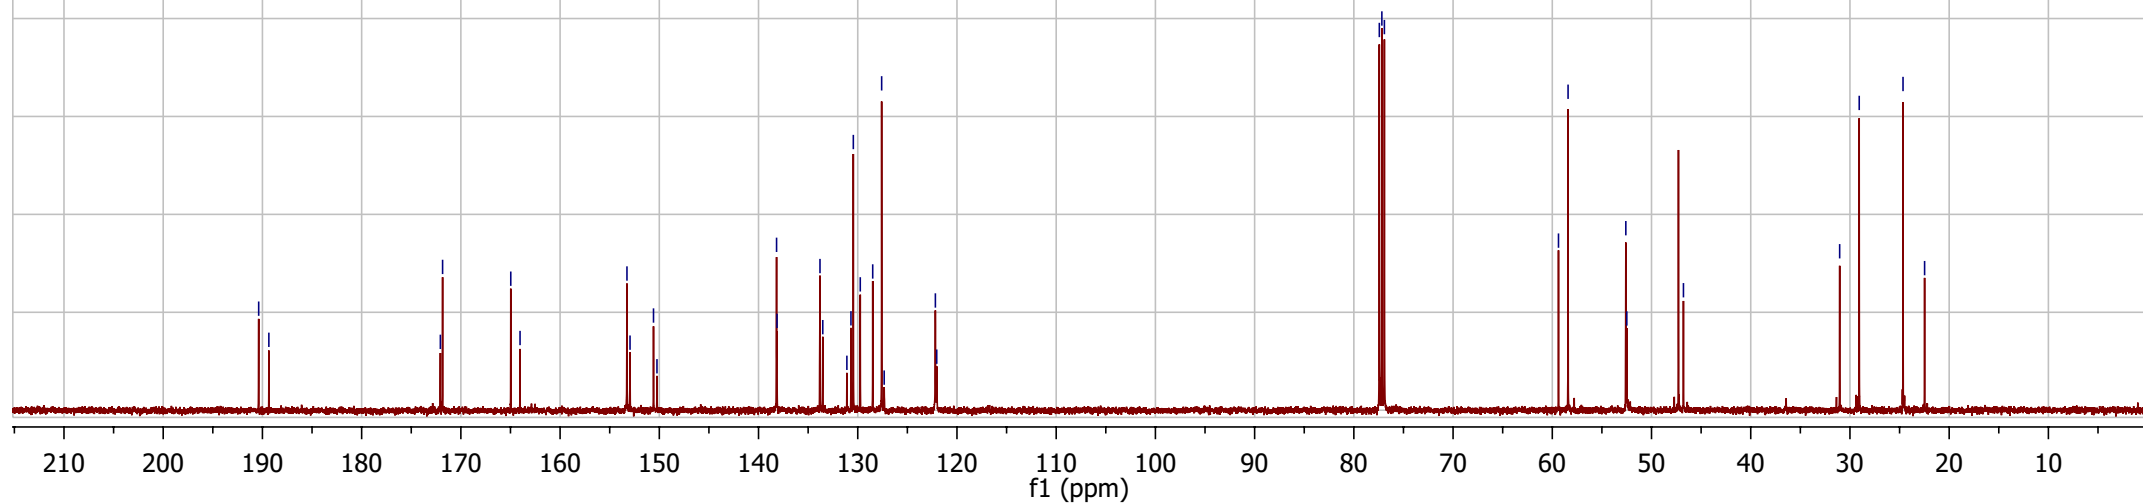

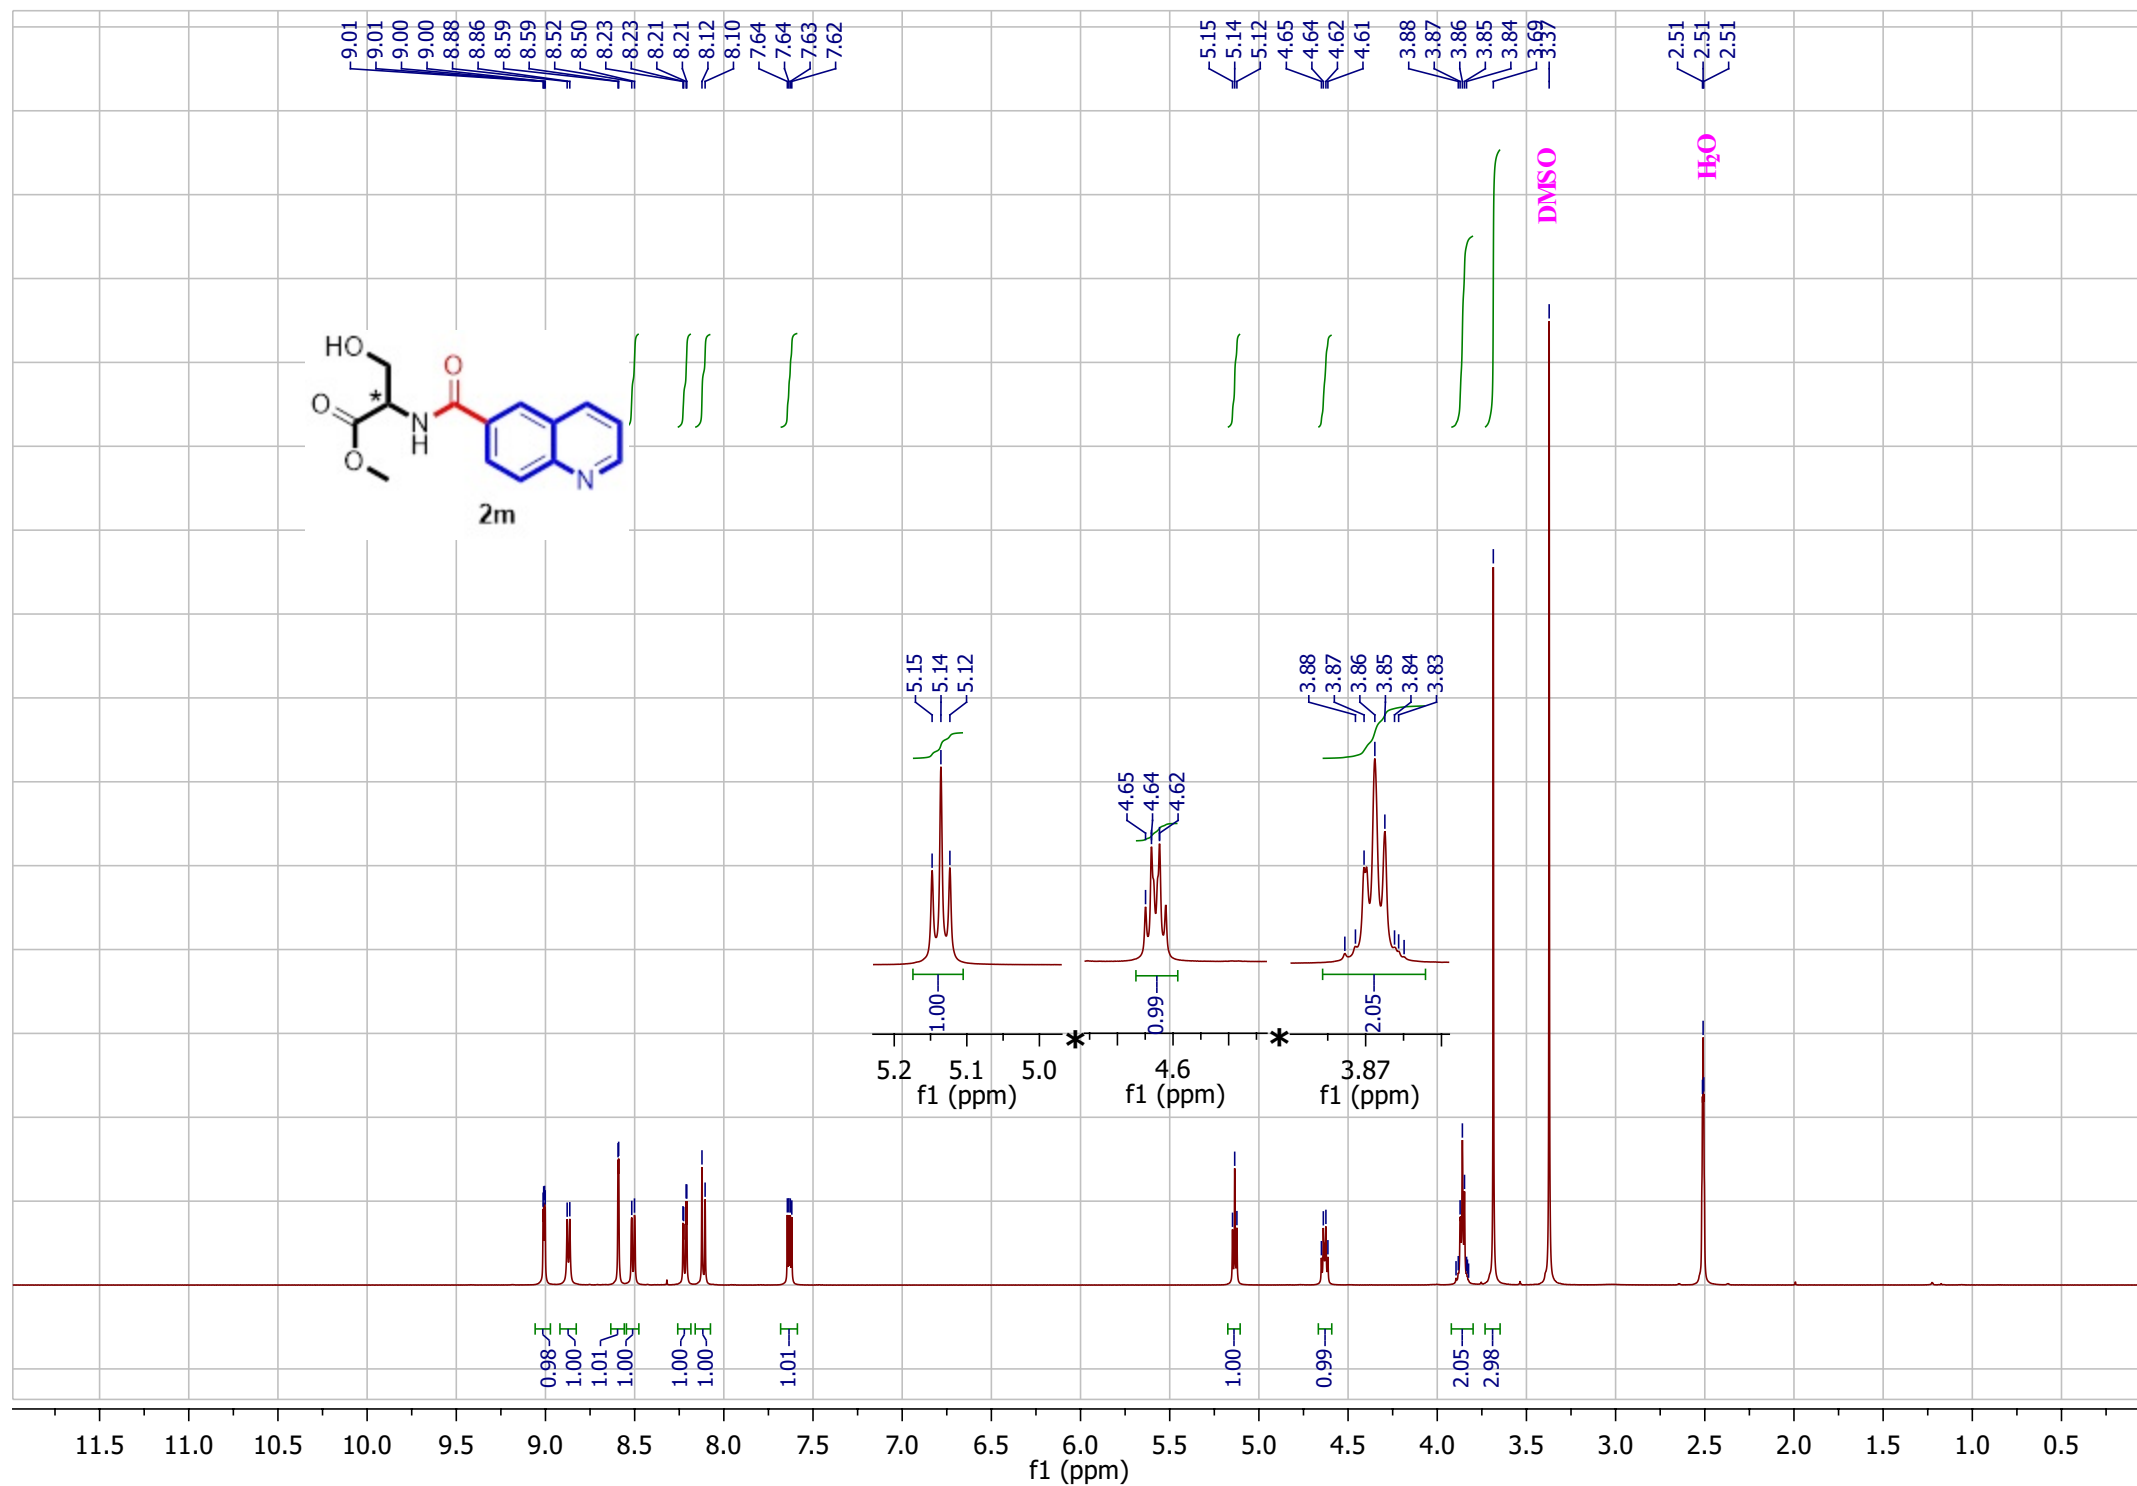

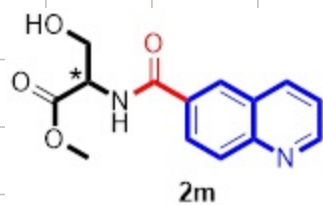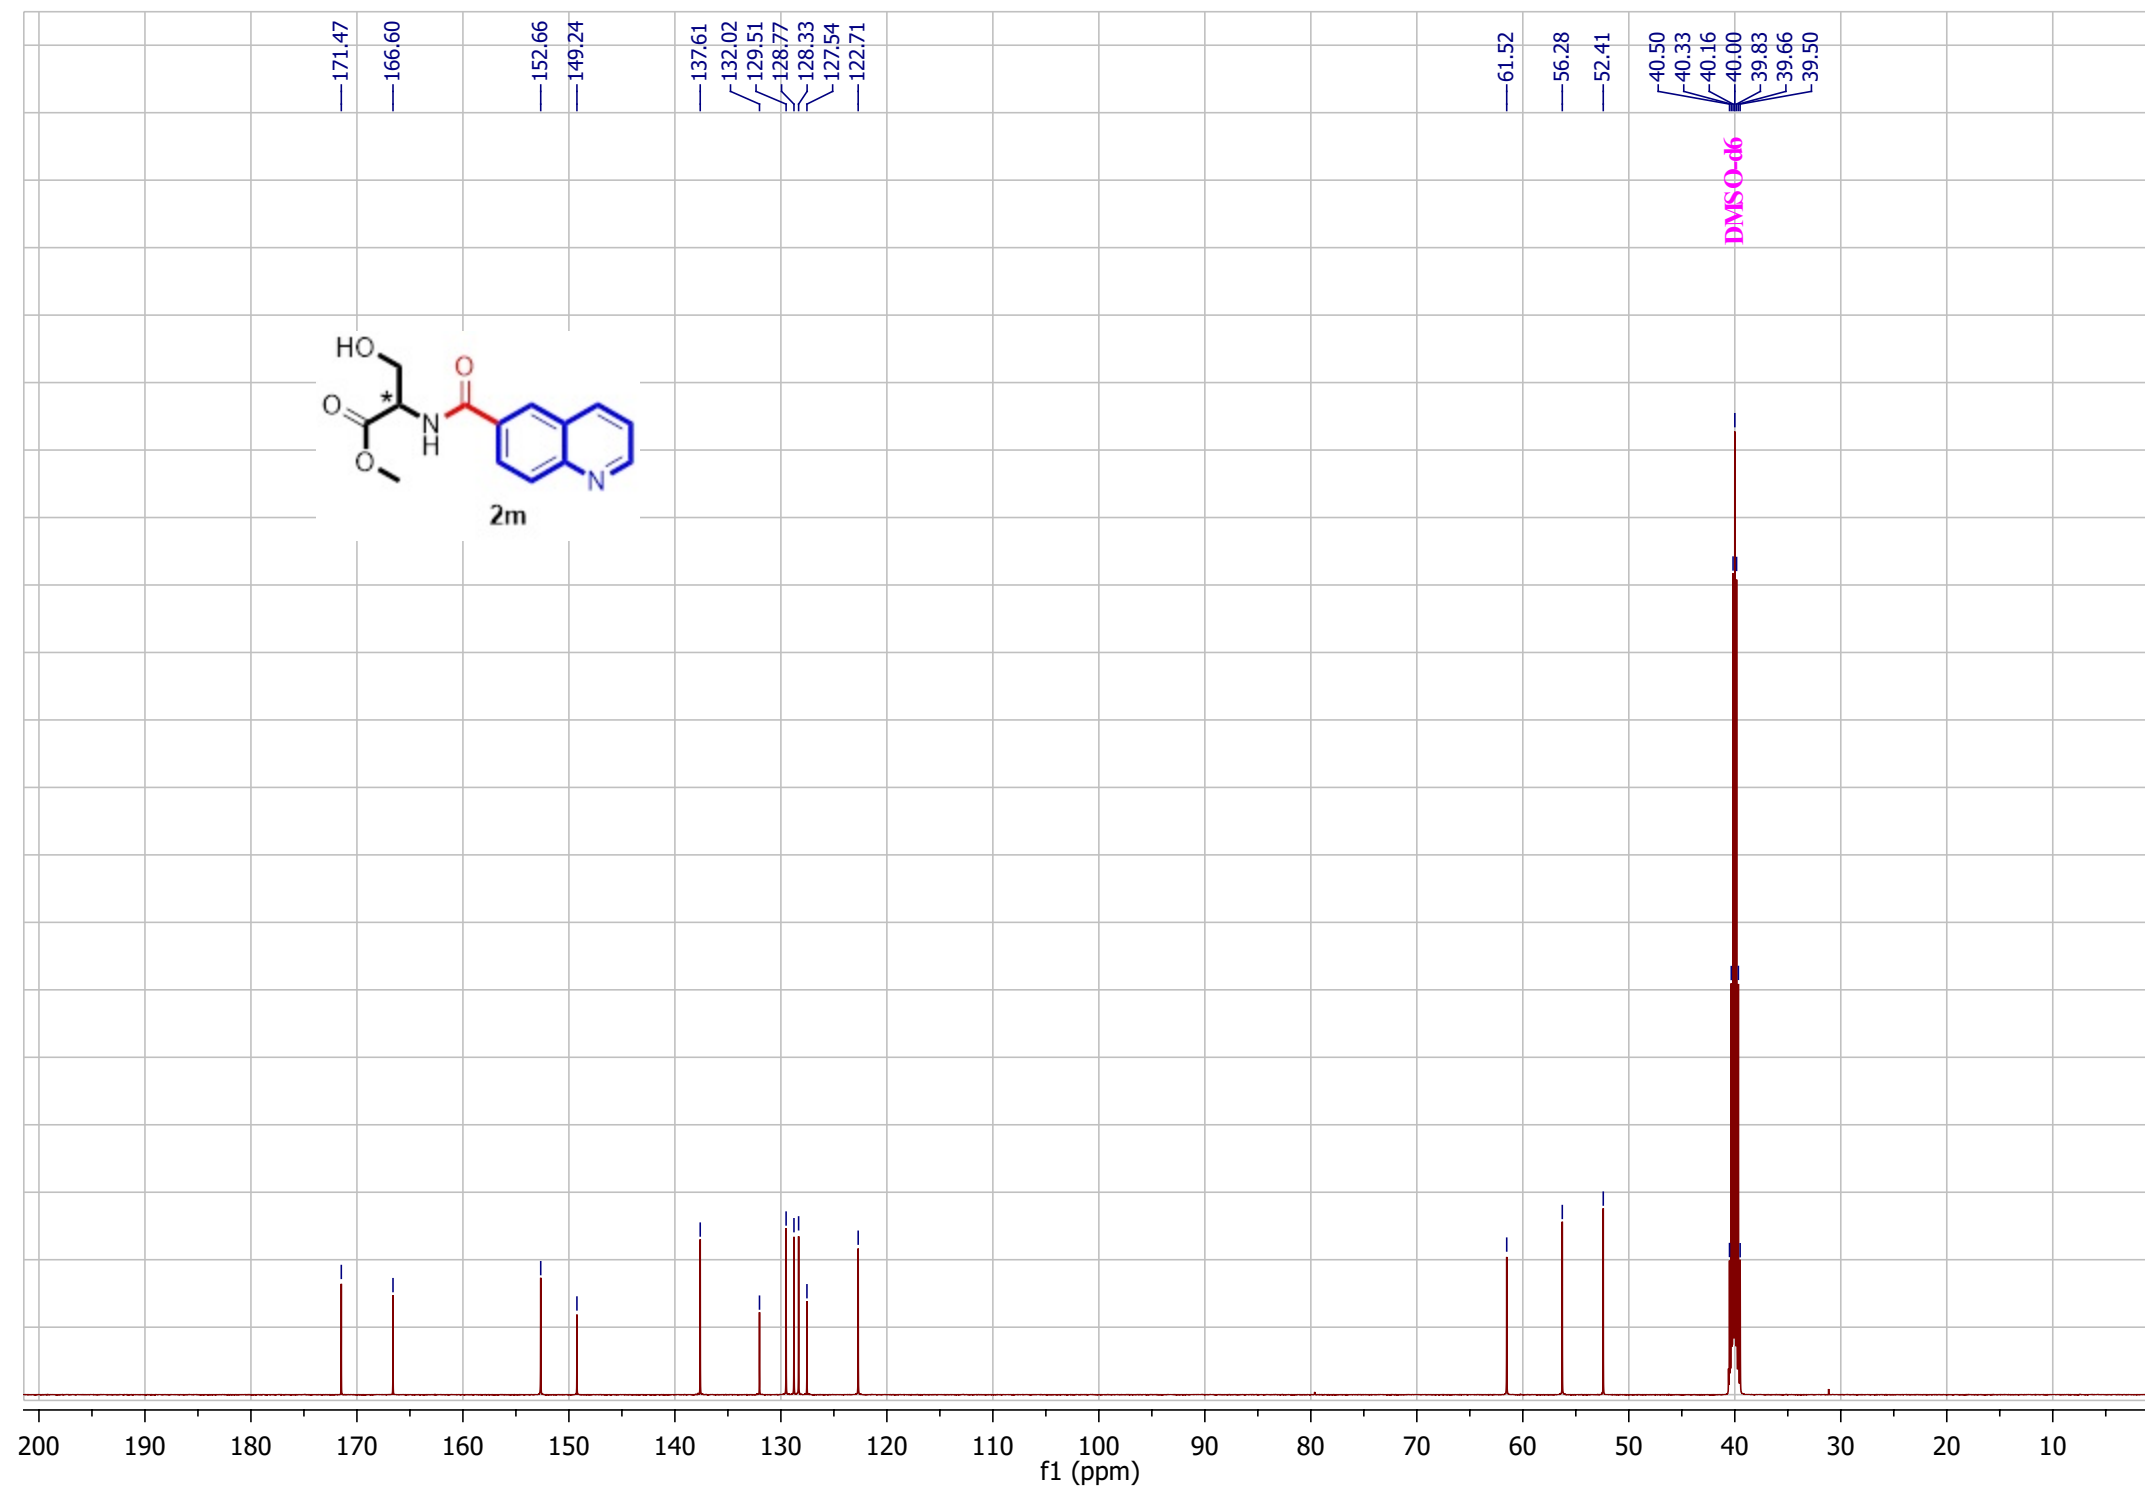

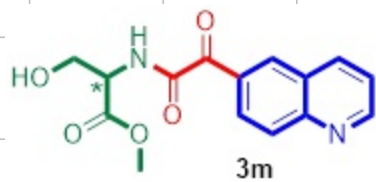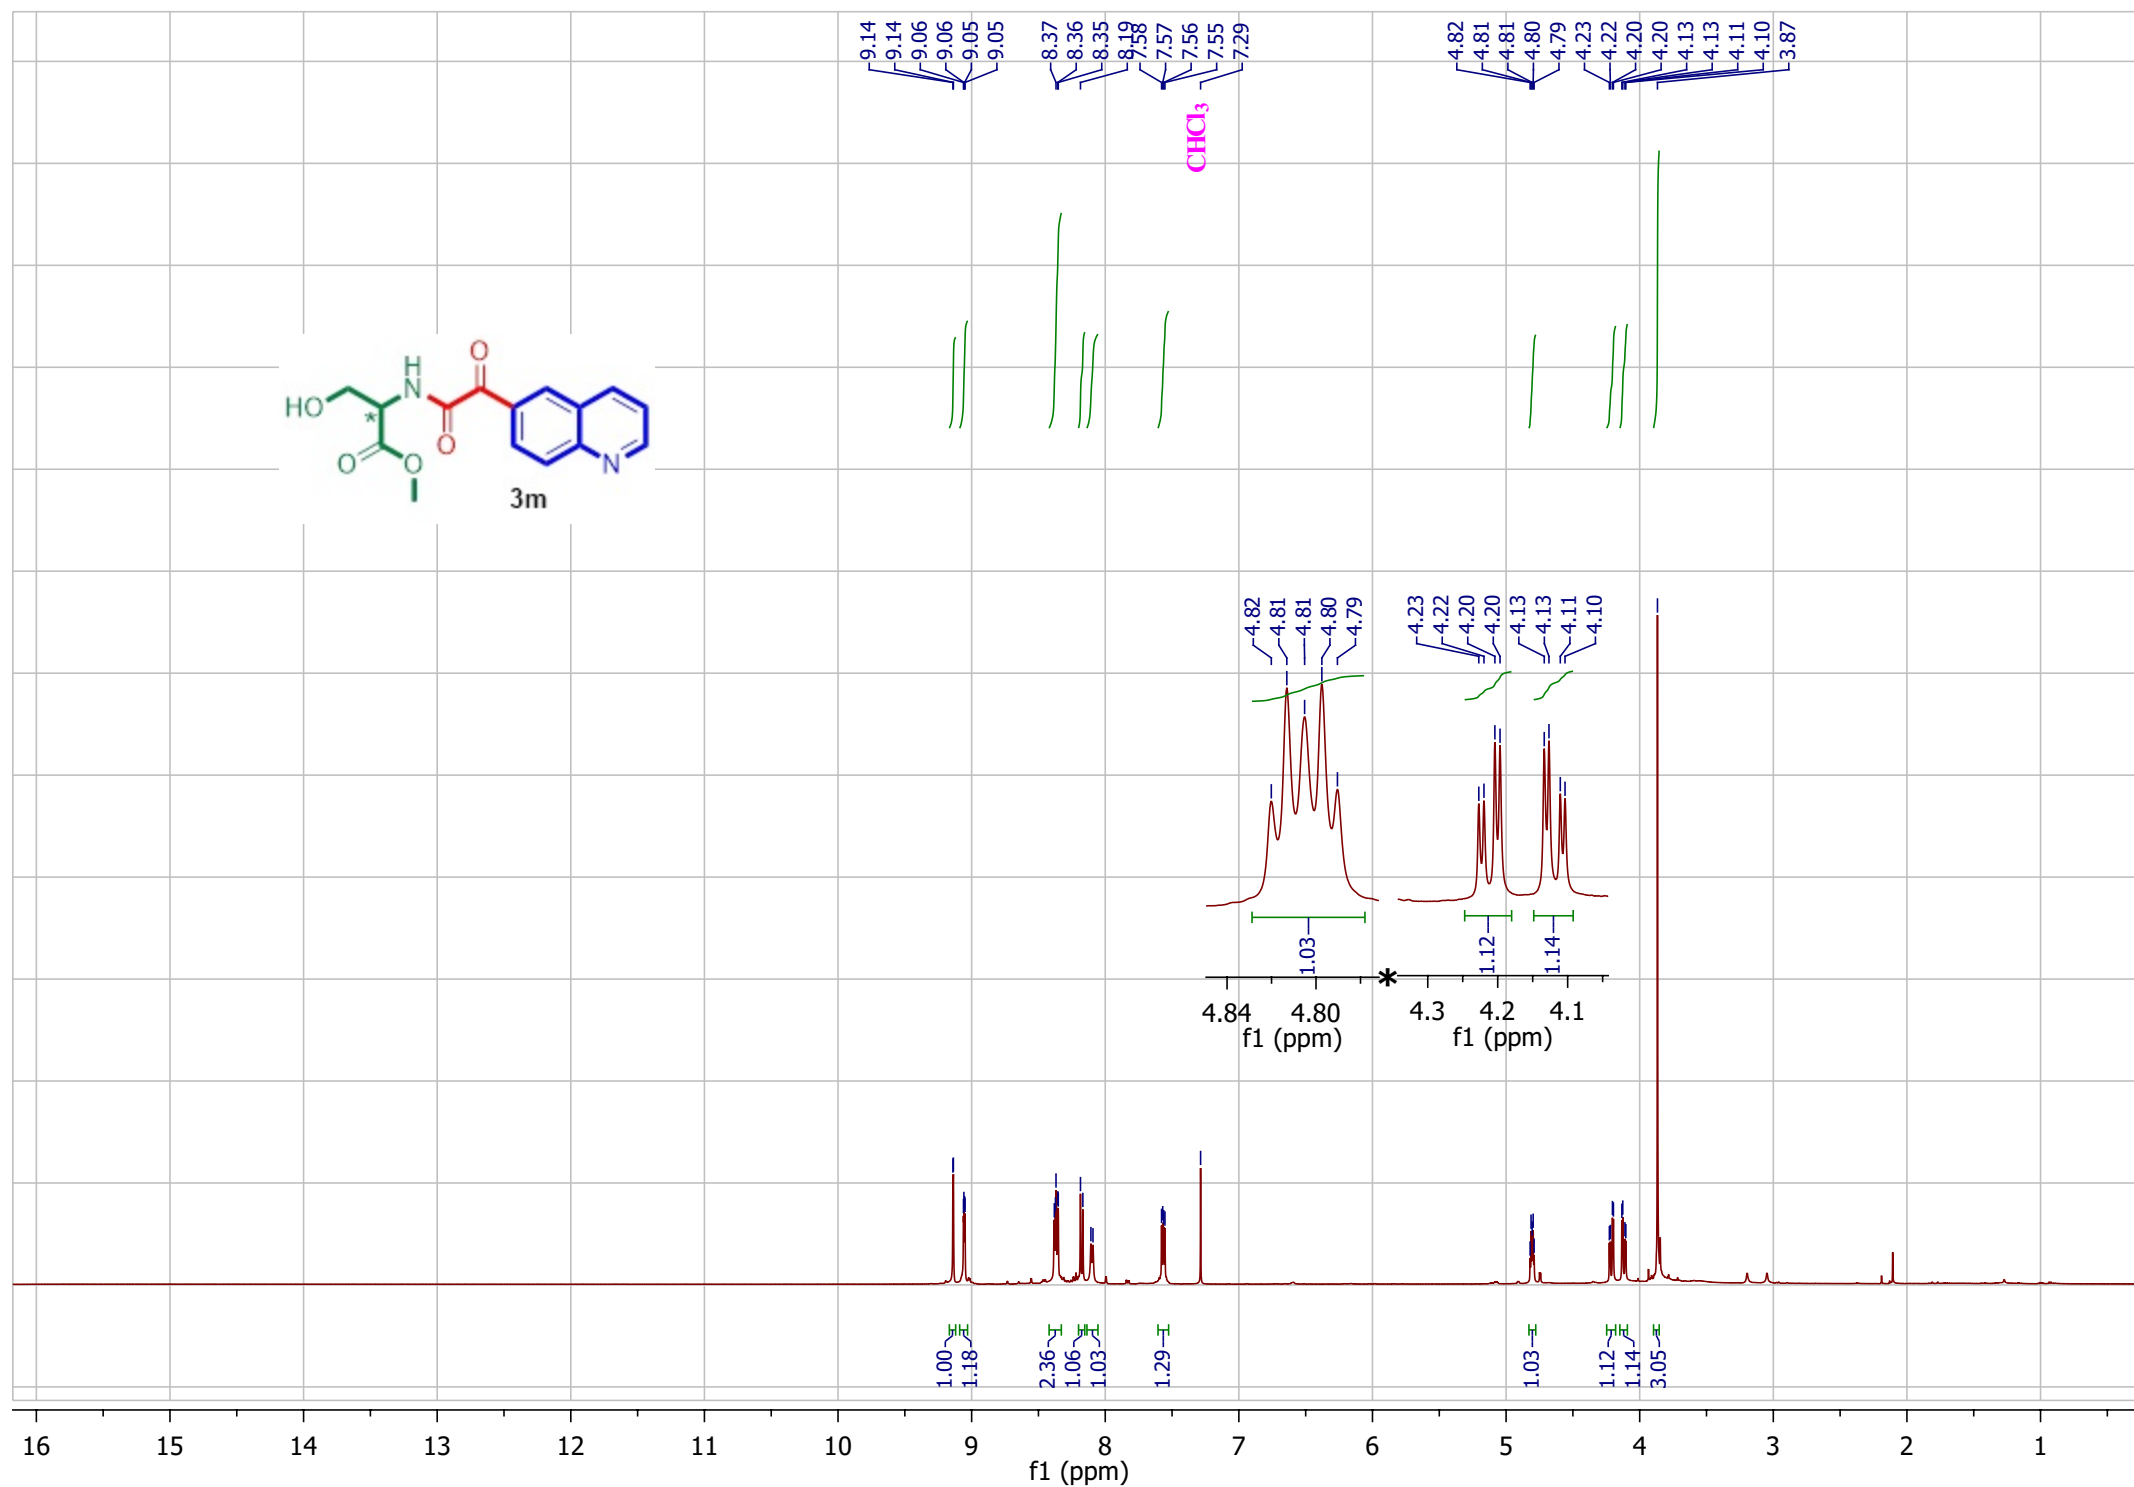

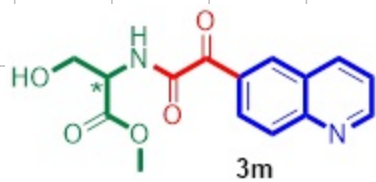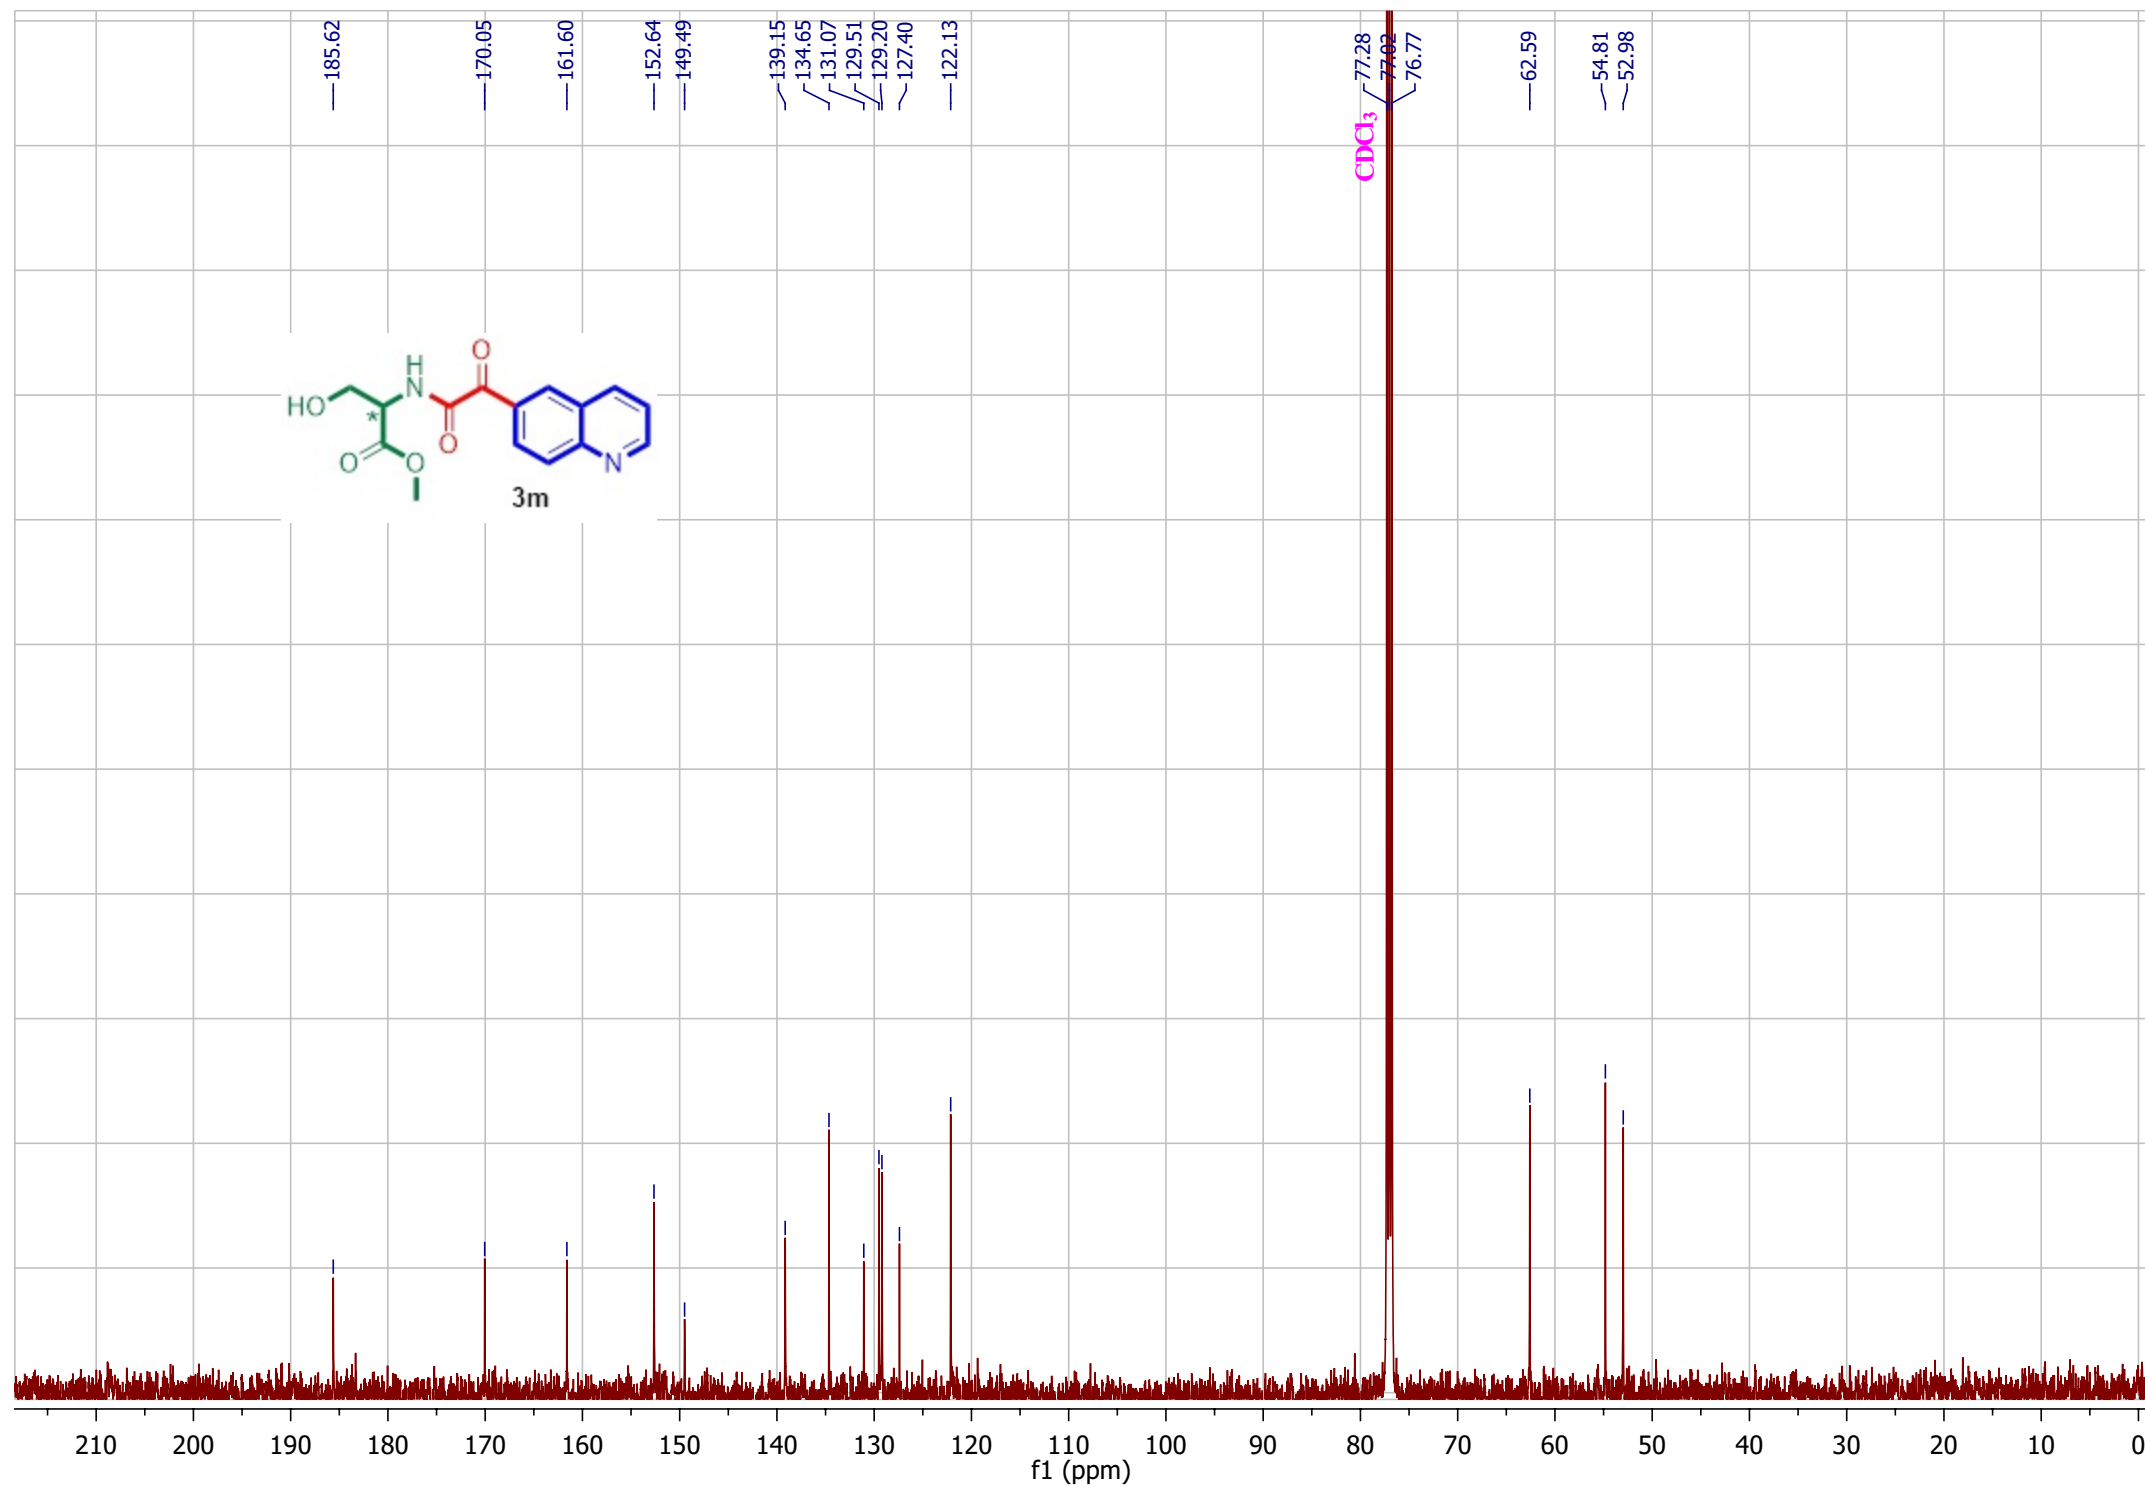

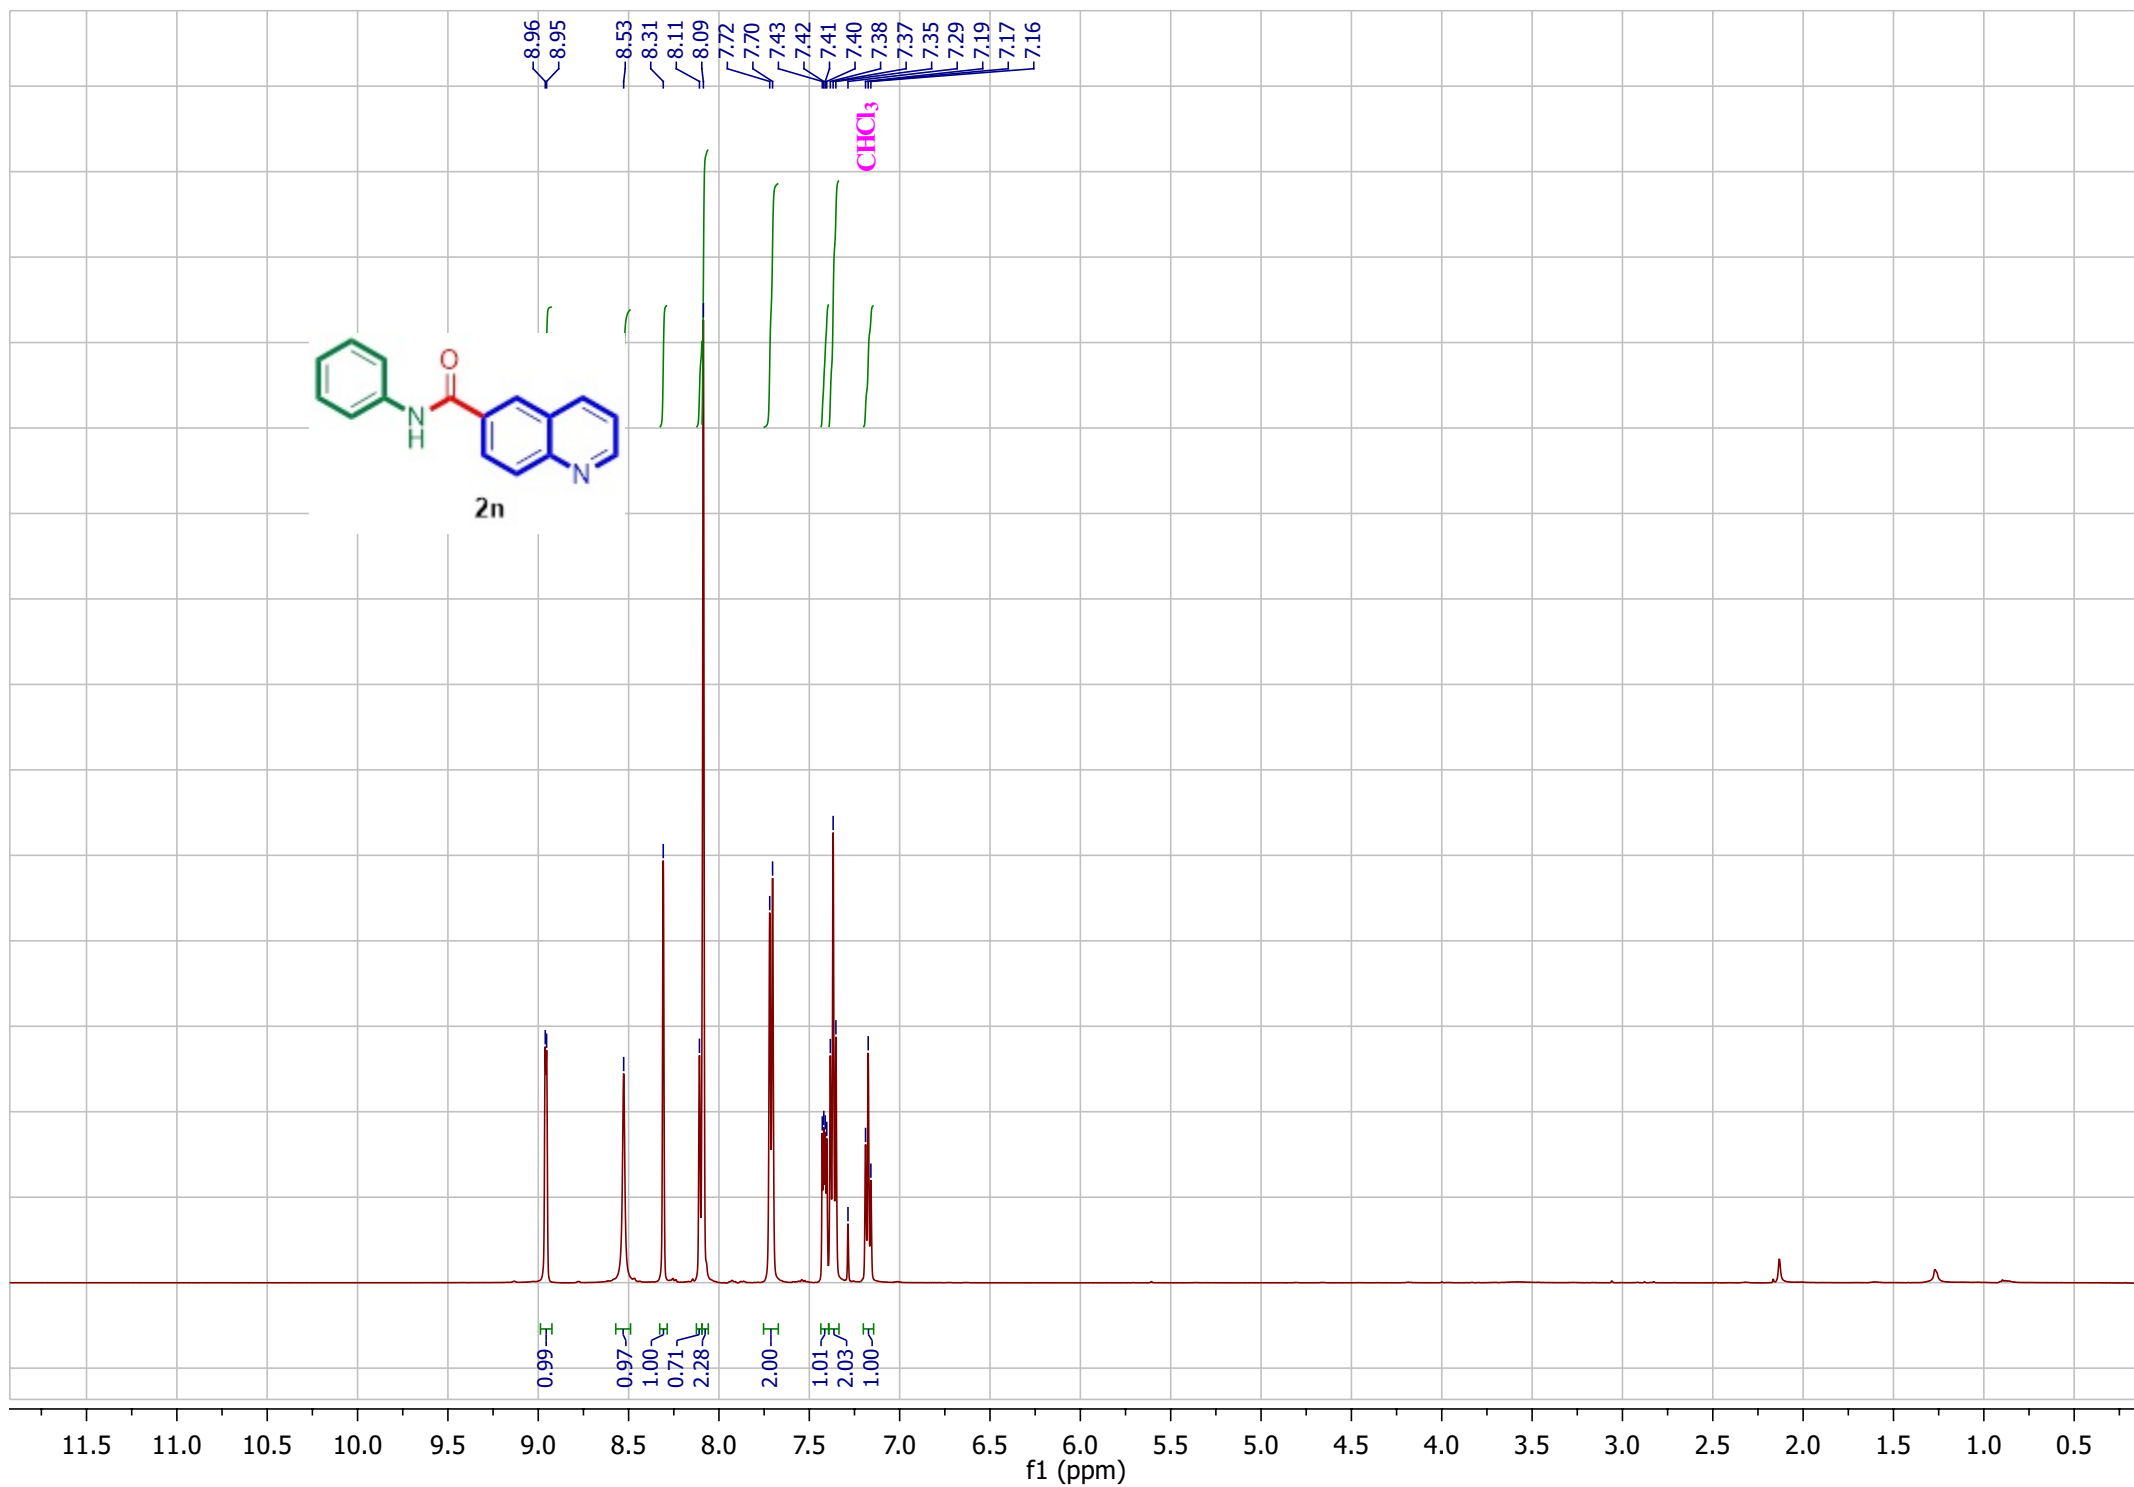



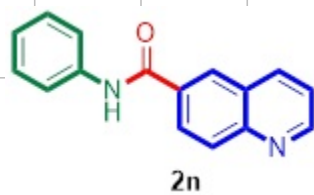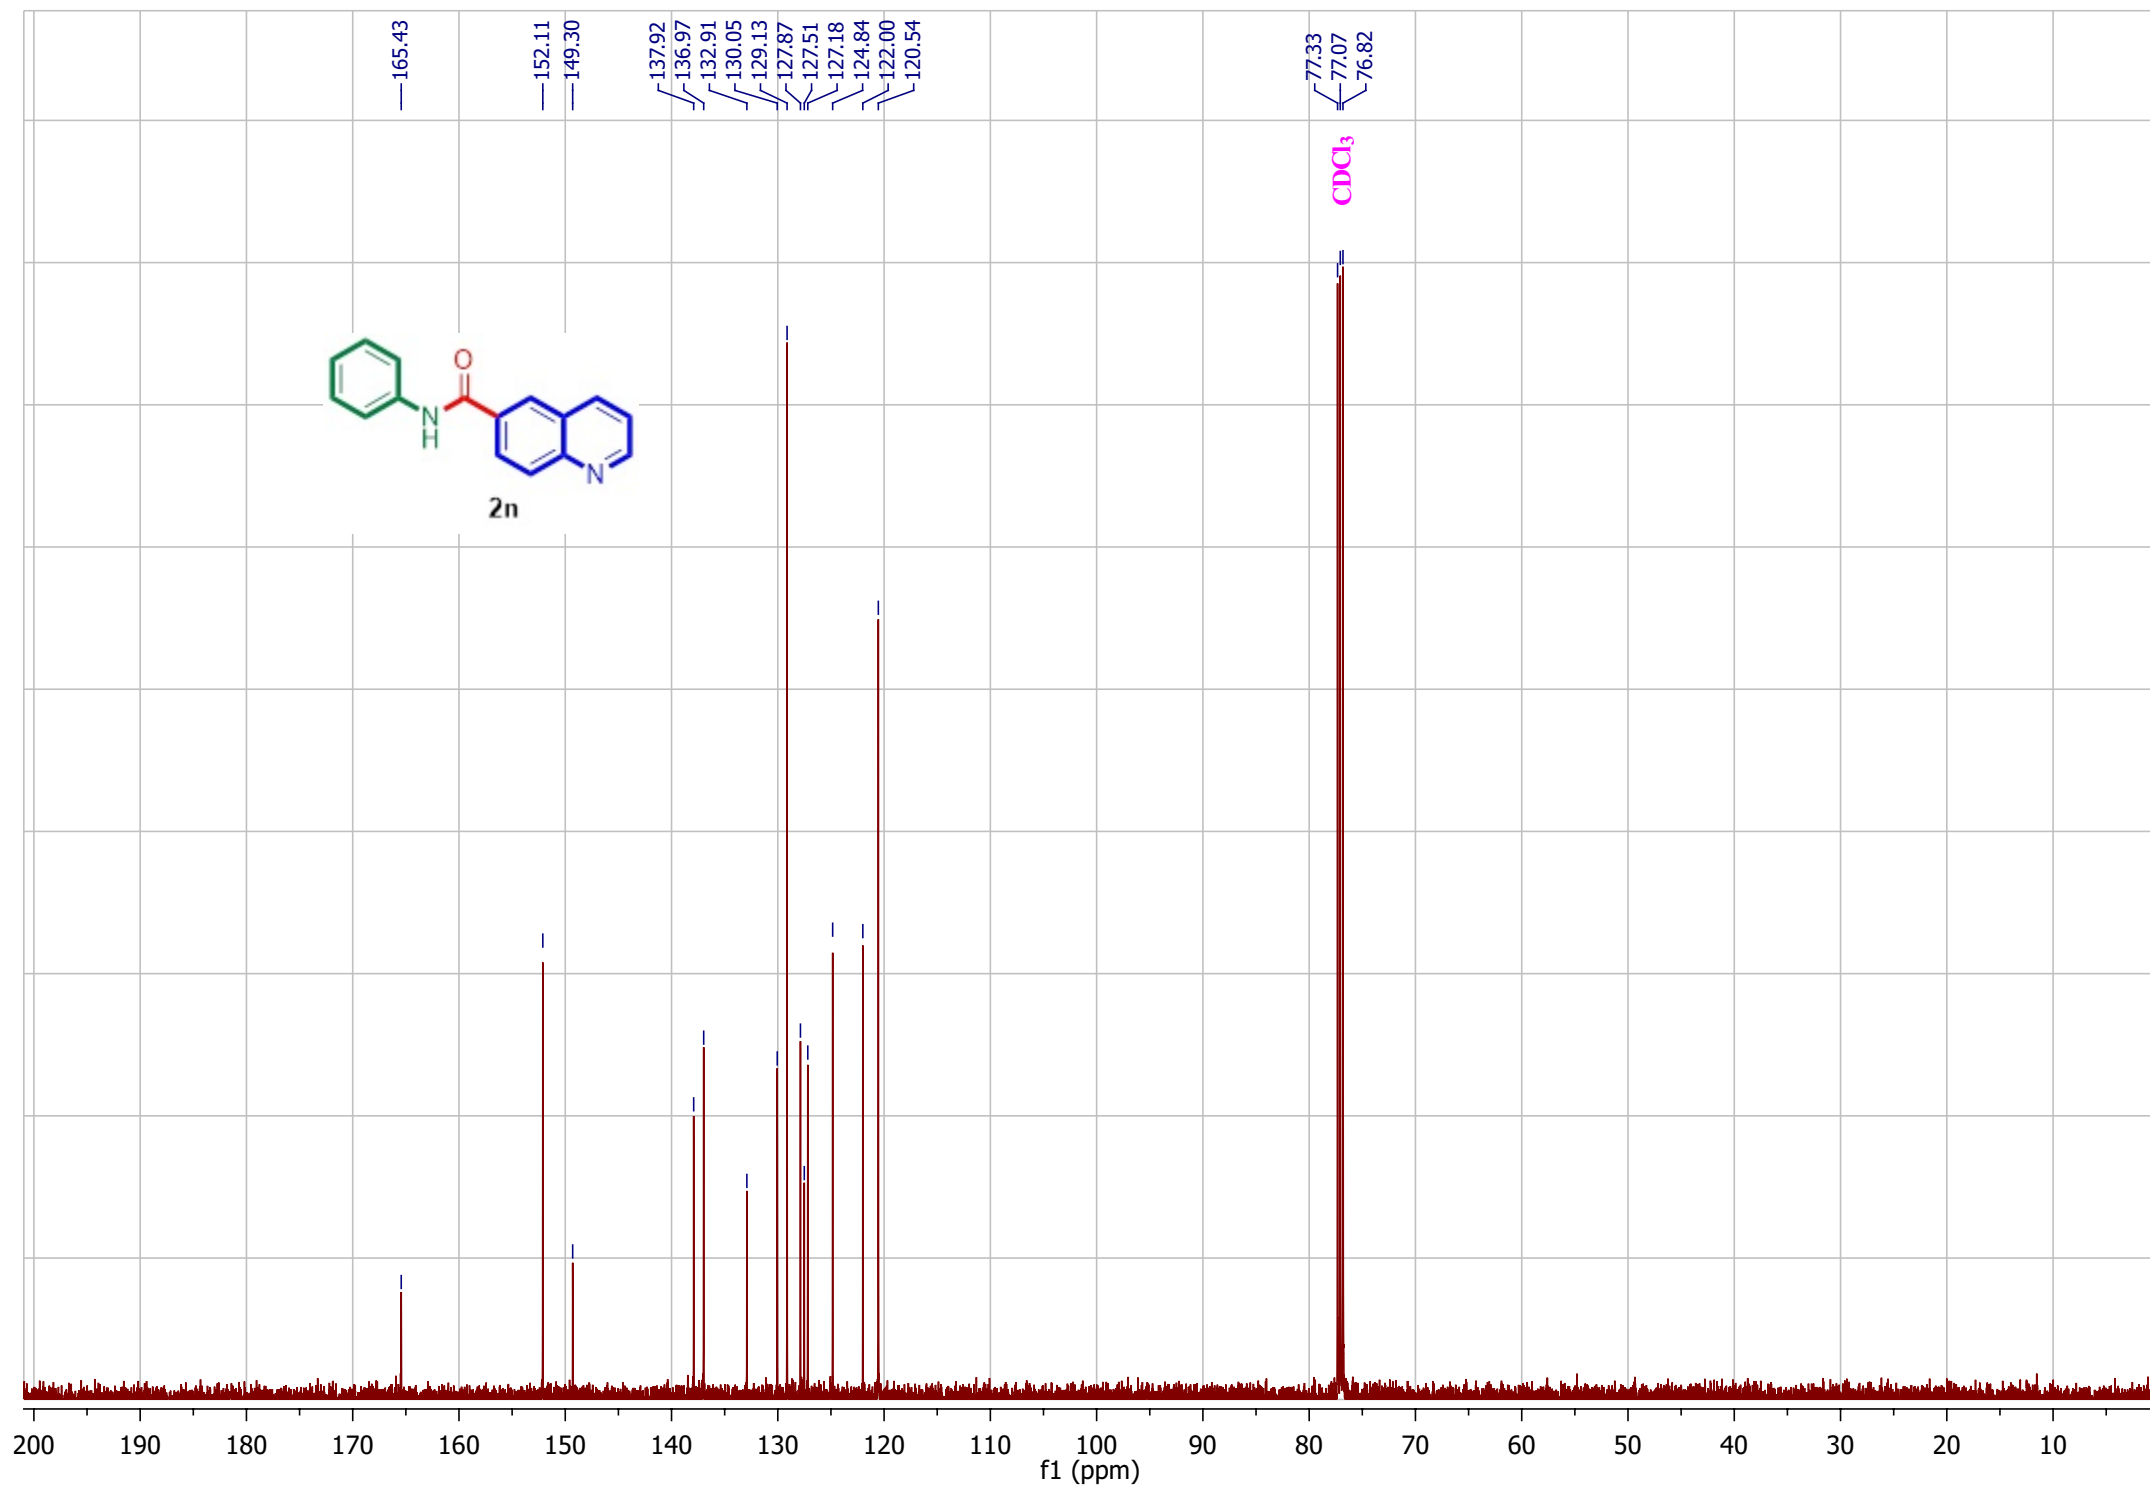

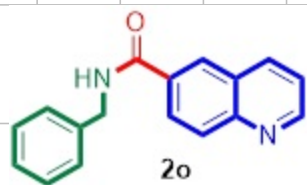

2o

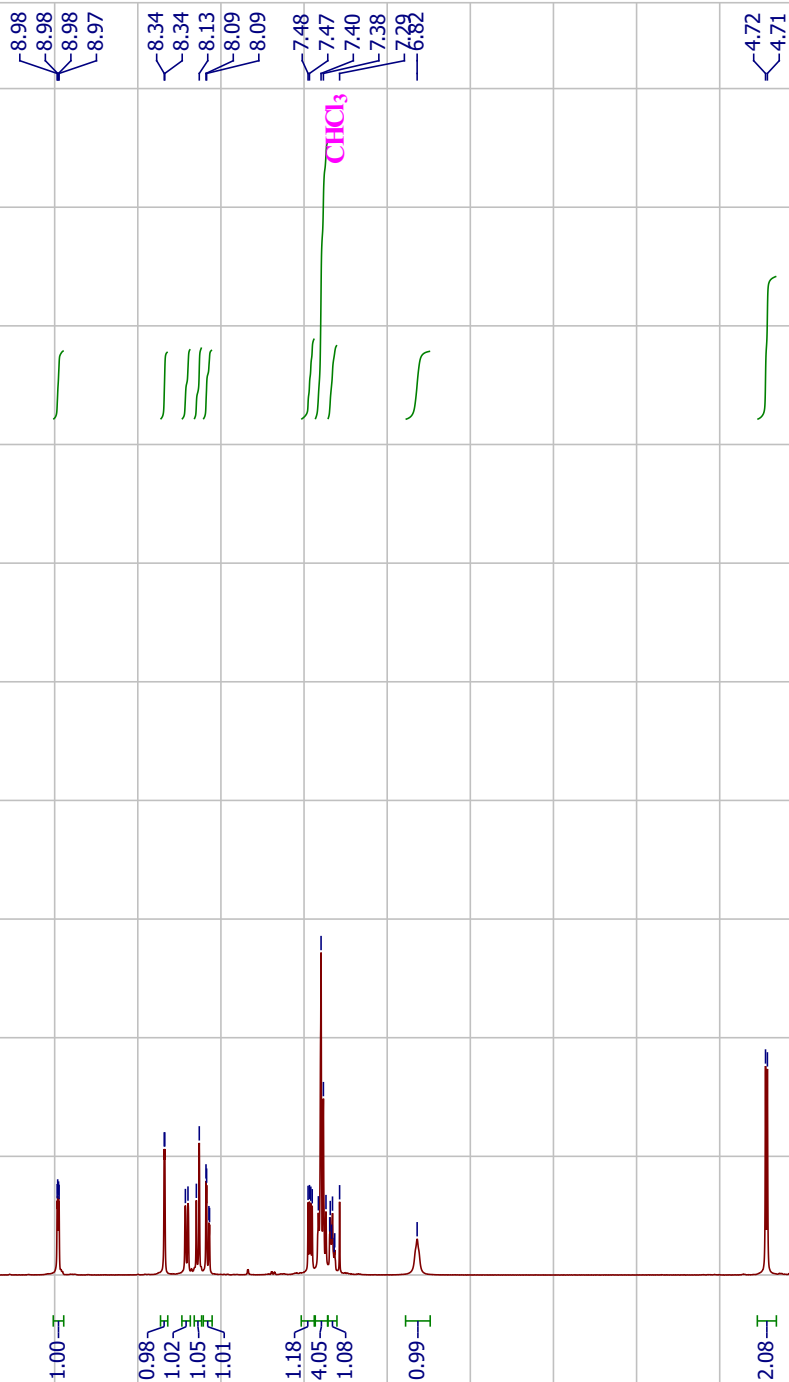

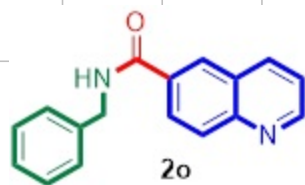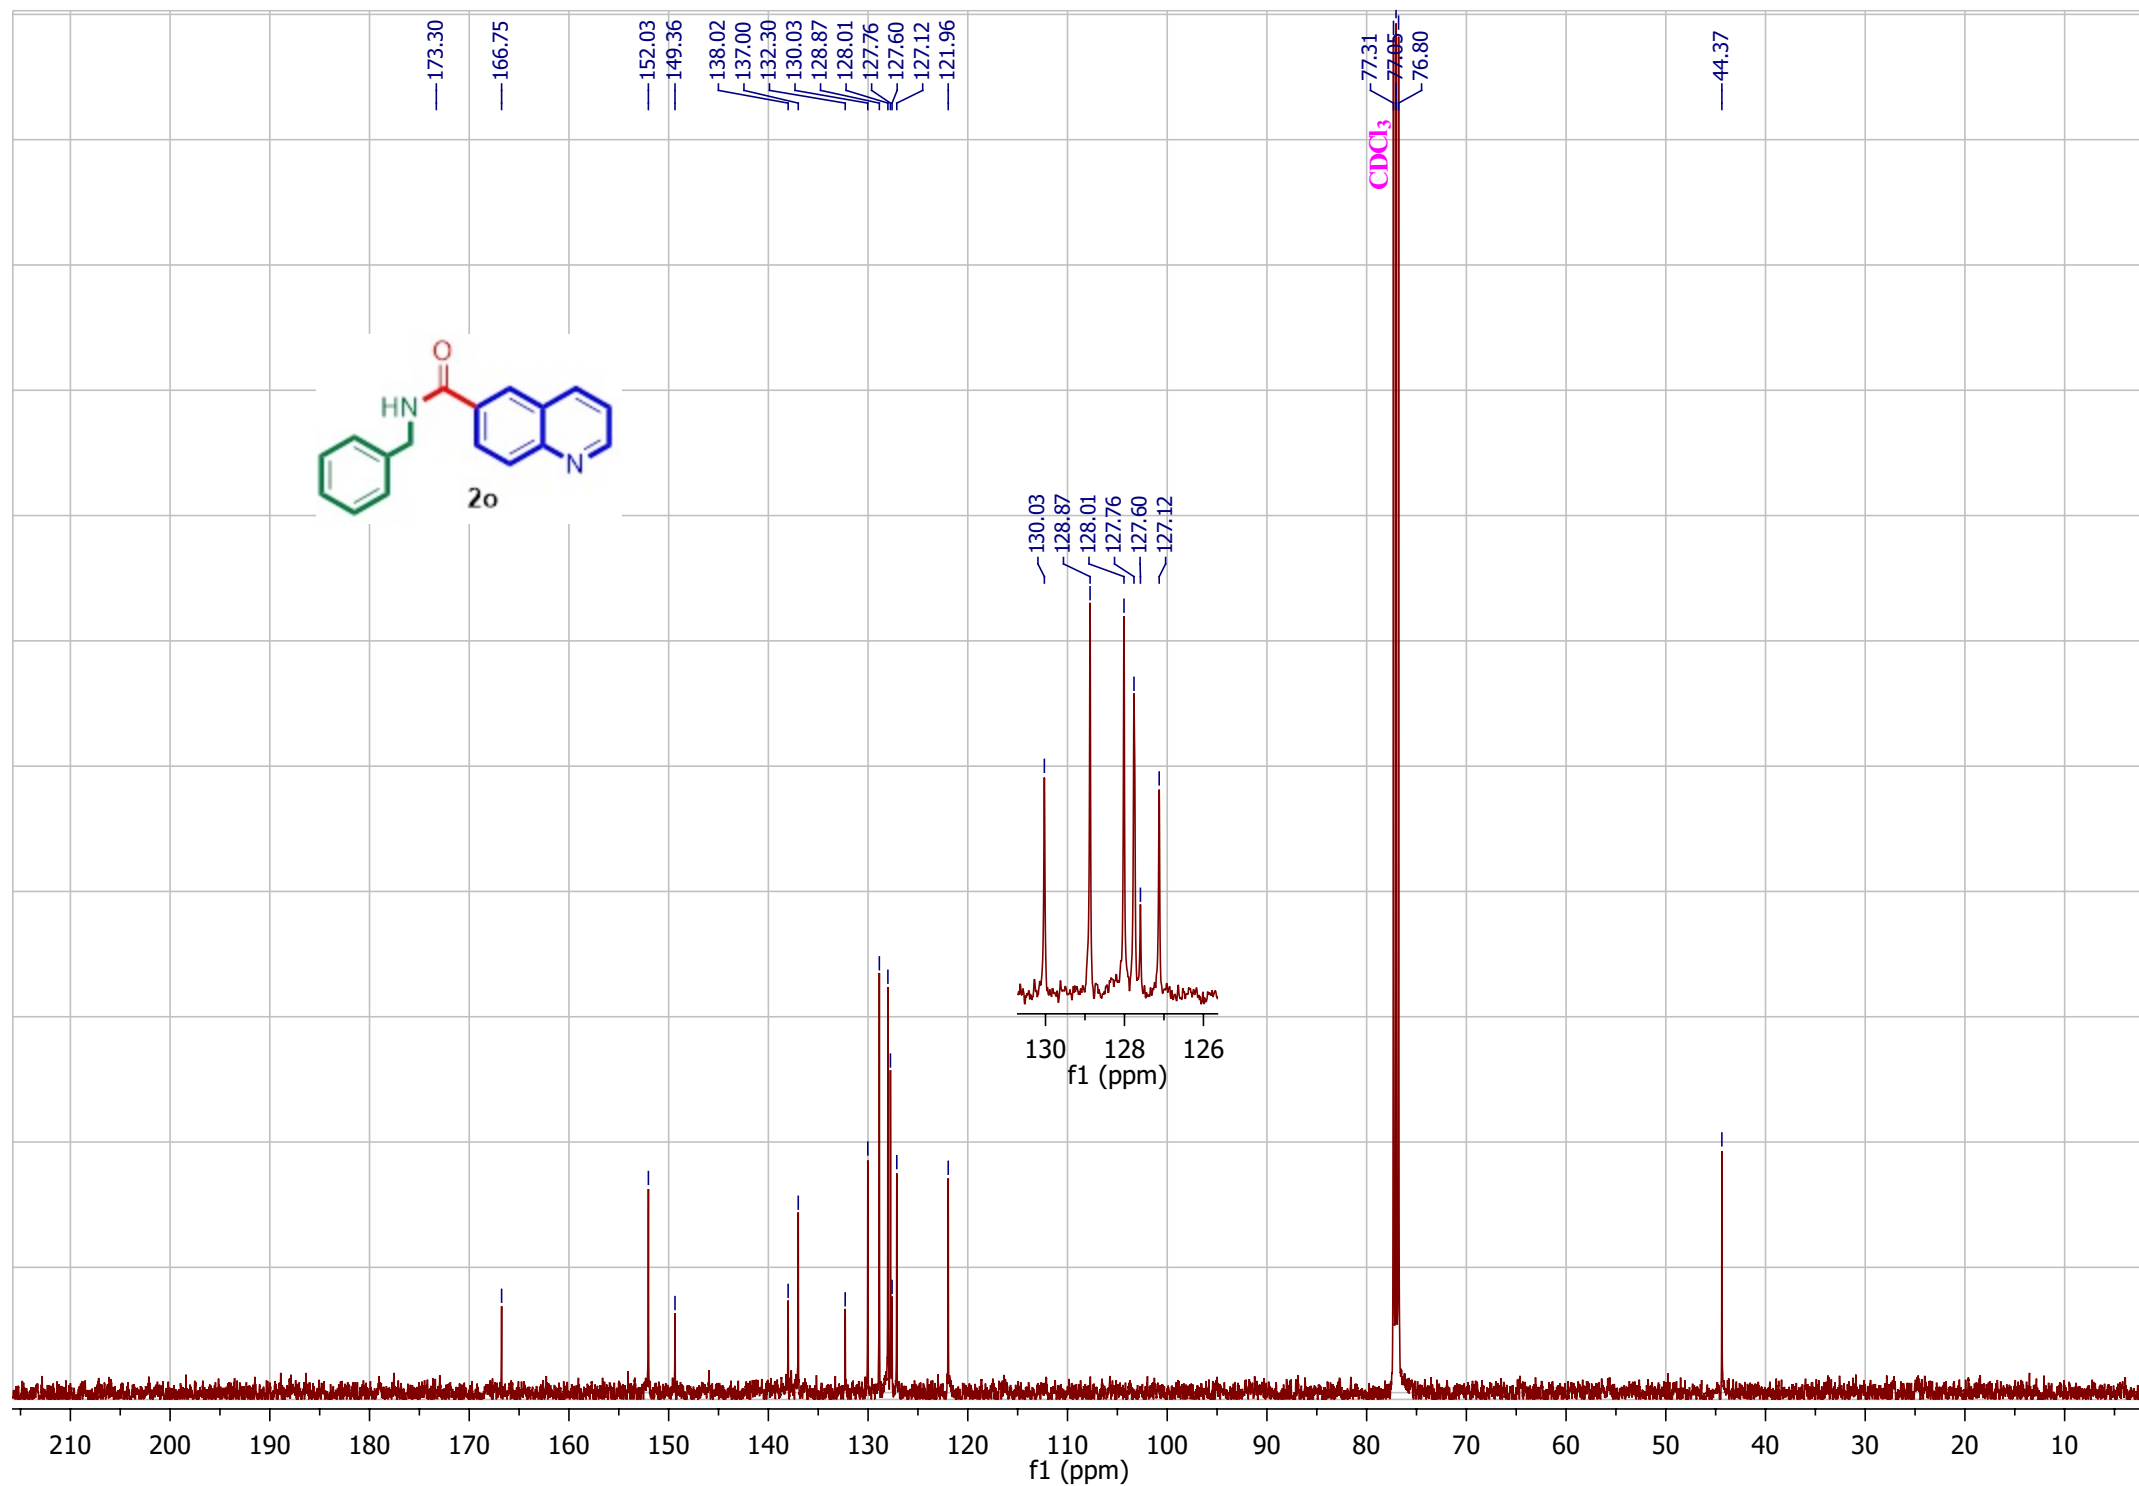

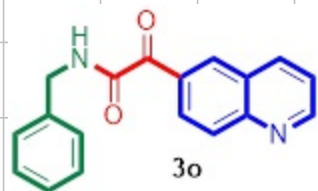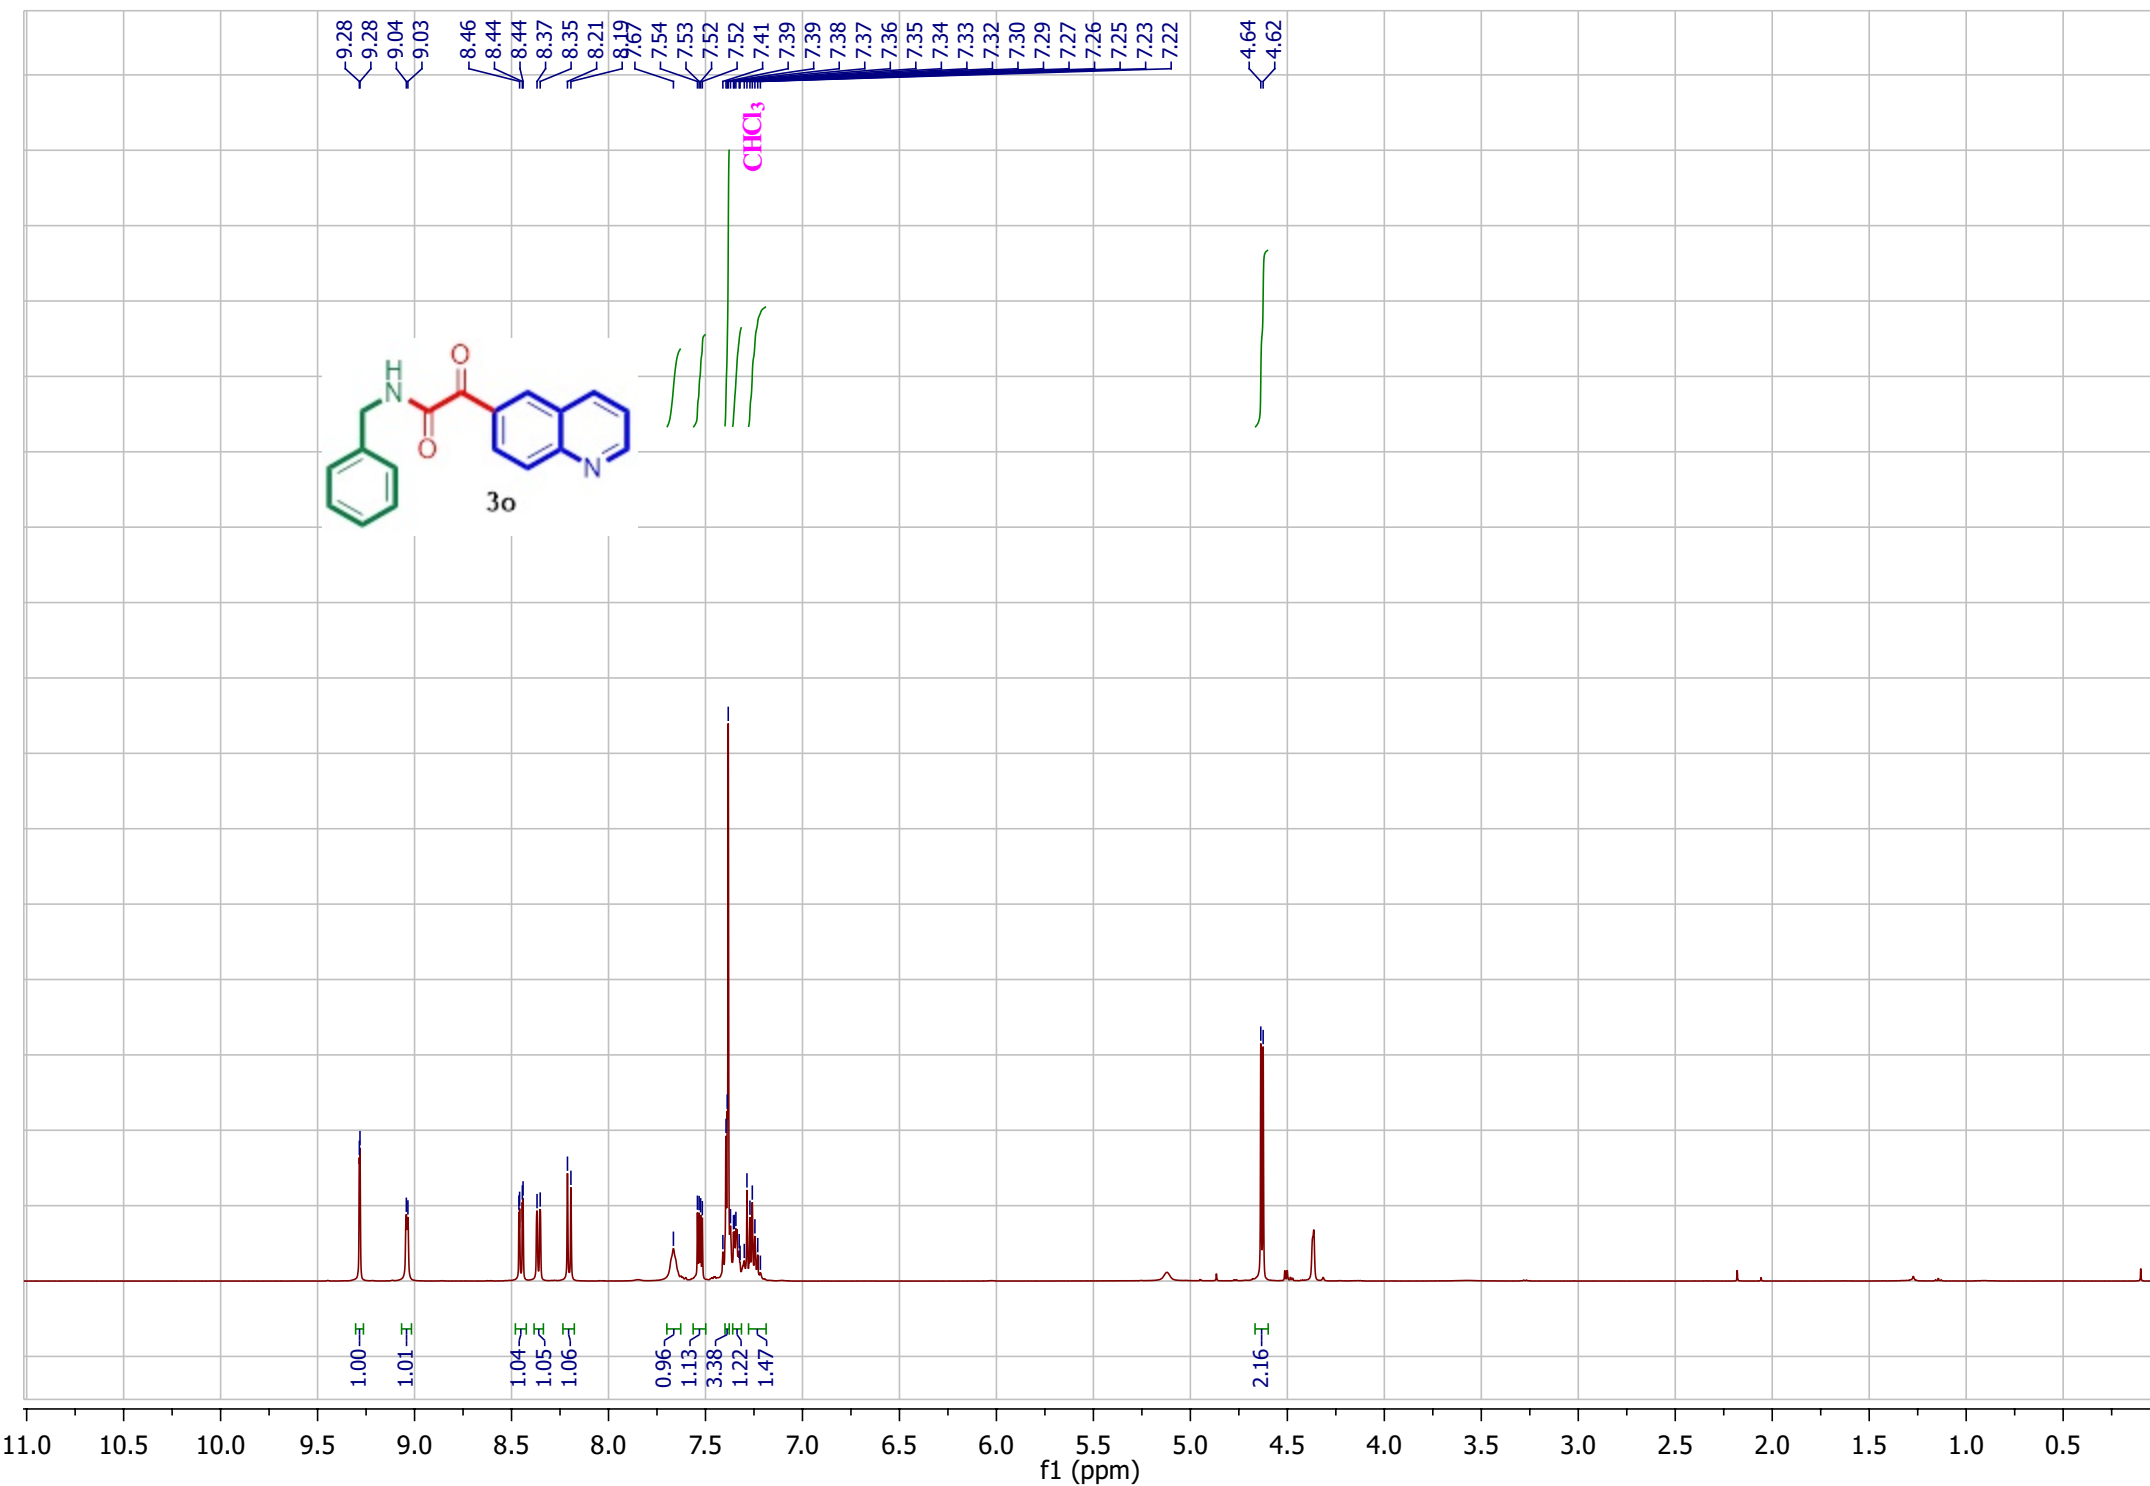

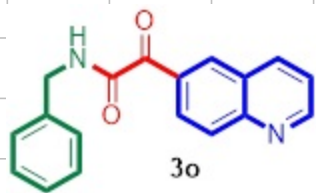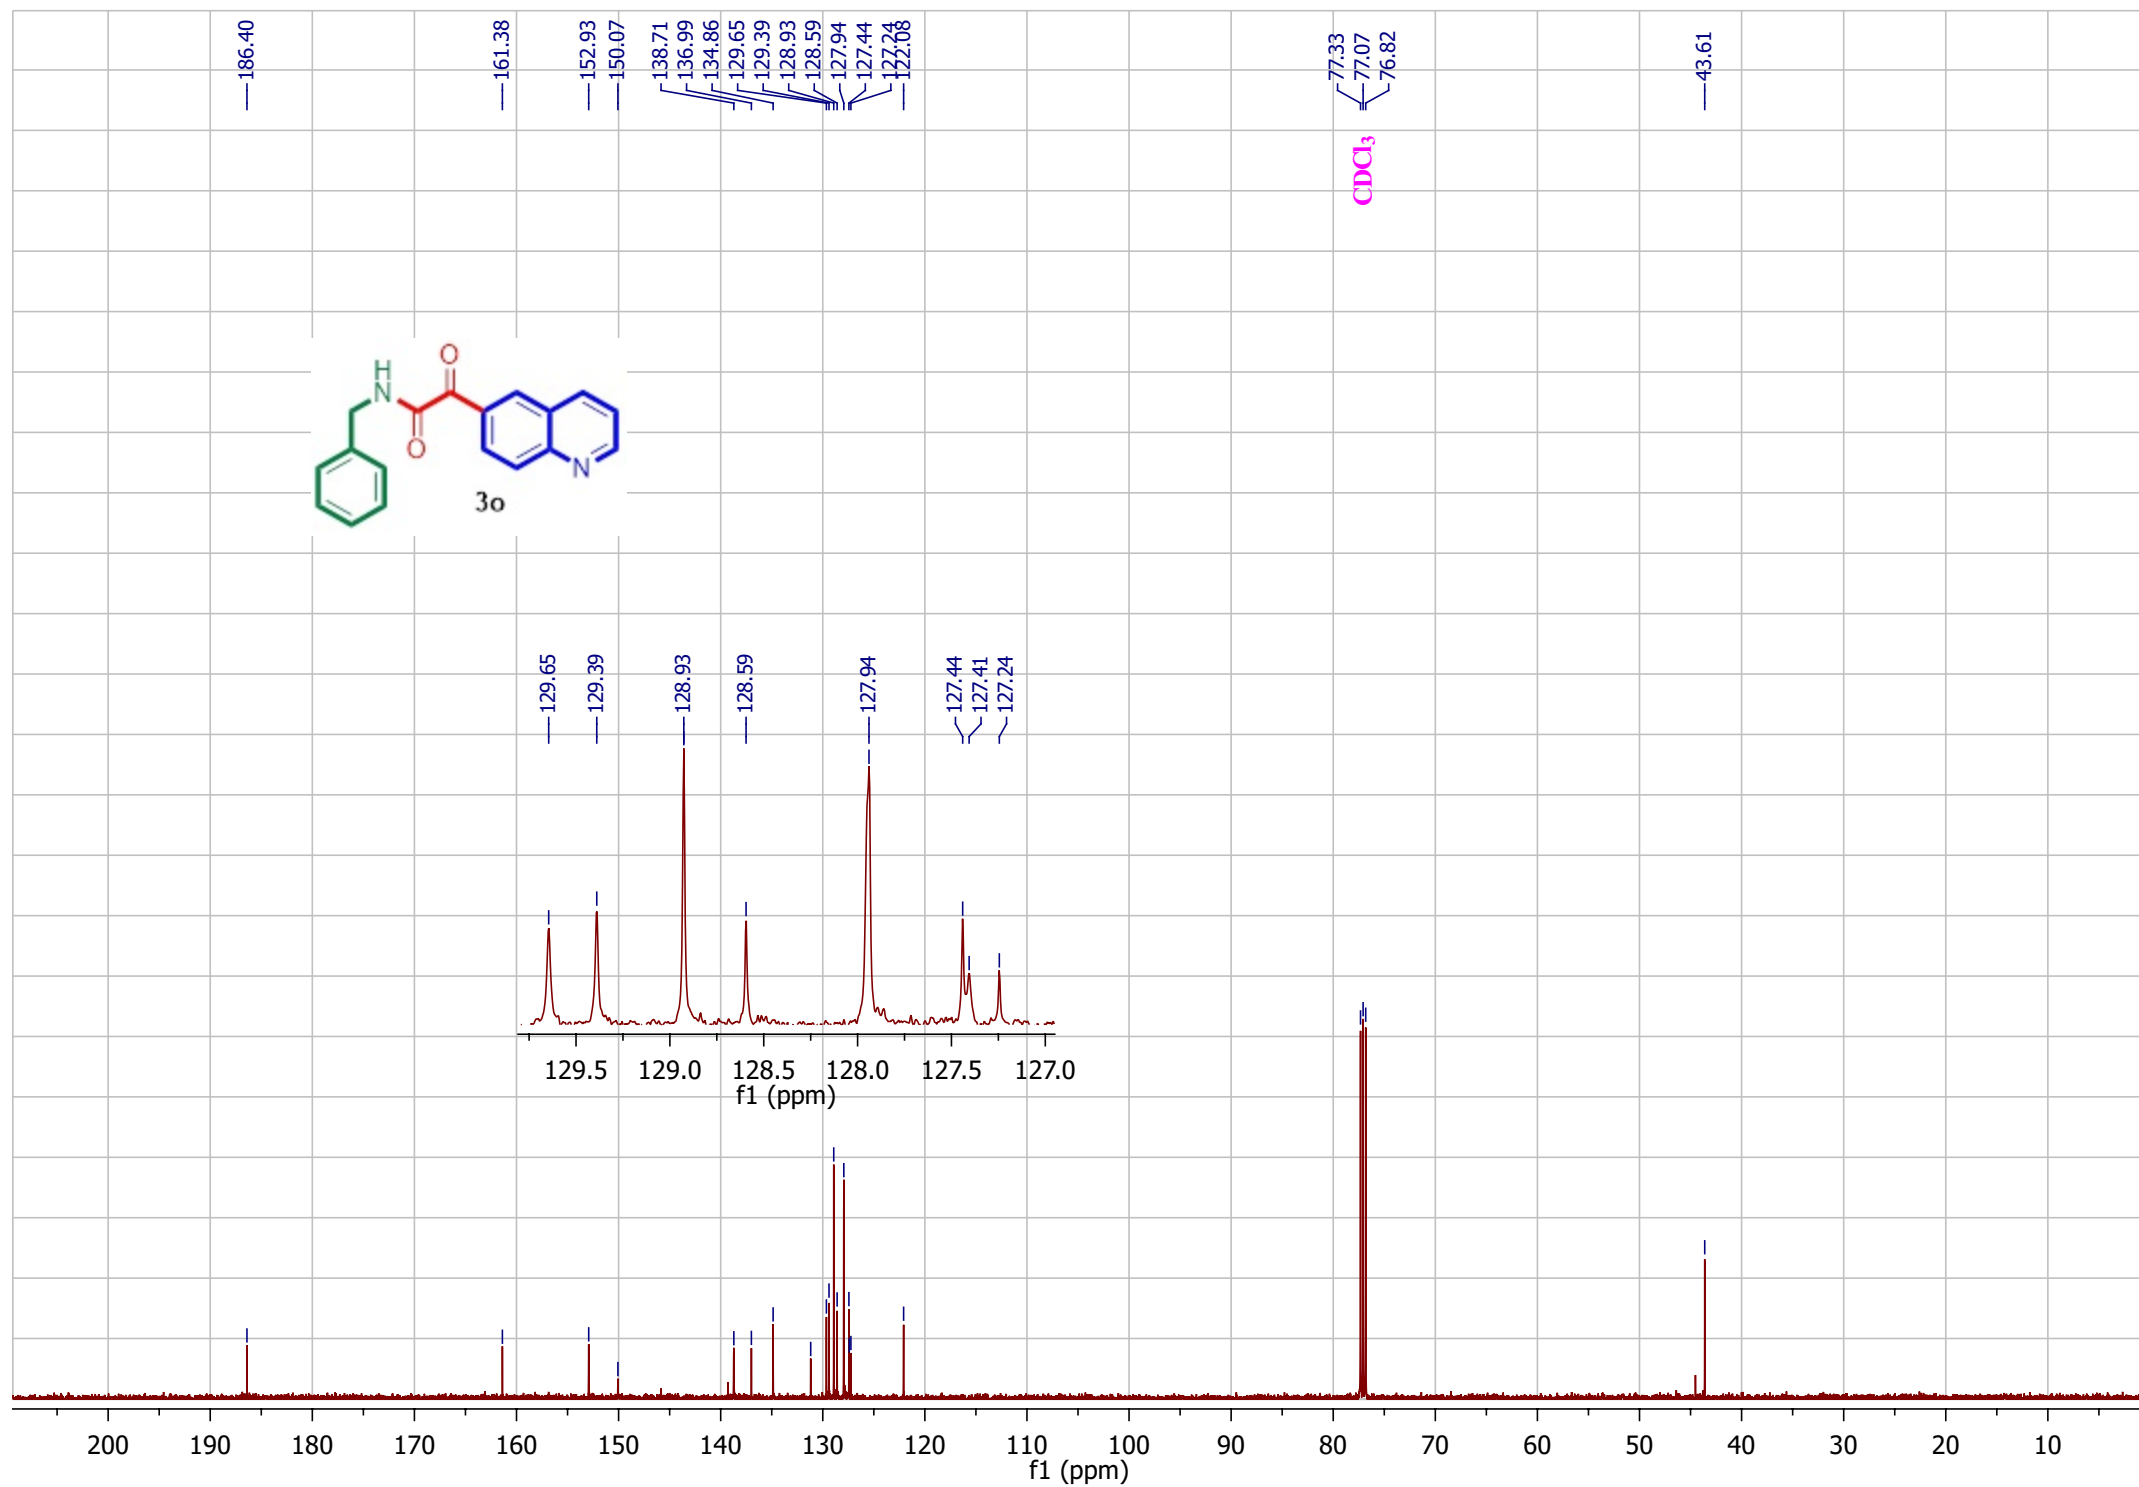

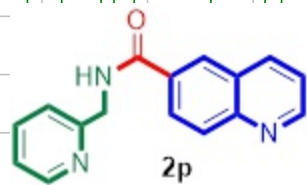

CHCl<sub>3</sub>

8.97  
8.97  
8.96  
8.96  
8.41  
8.41  
8.22  
8.22  
8.16  
8.16  
7.72  
7.72  
7.71  
7.70  
7.69  
7.69  
7.46  
7.45  
7.44  
7.44  
7.38  
7.36  
7.29  
7.27  
7.25  
7.24  
7.23  
7.22  
7.20

4.82  
4.81

10.0 9.5 9.0 8.5 8.0 7.5 7.0 6.5 6.0 5.5 5.0 4.5 4.0 3.5 3.0 2.5 2.0 1.5 1.0 0.5 0.0

f1 (ppm)

1.00

1.06

1.02

1.07

2.10

0.95

1.02

1.05

1.01

1.22

2.00

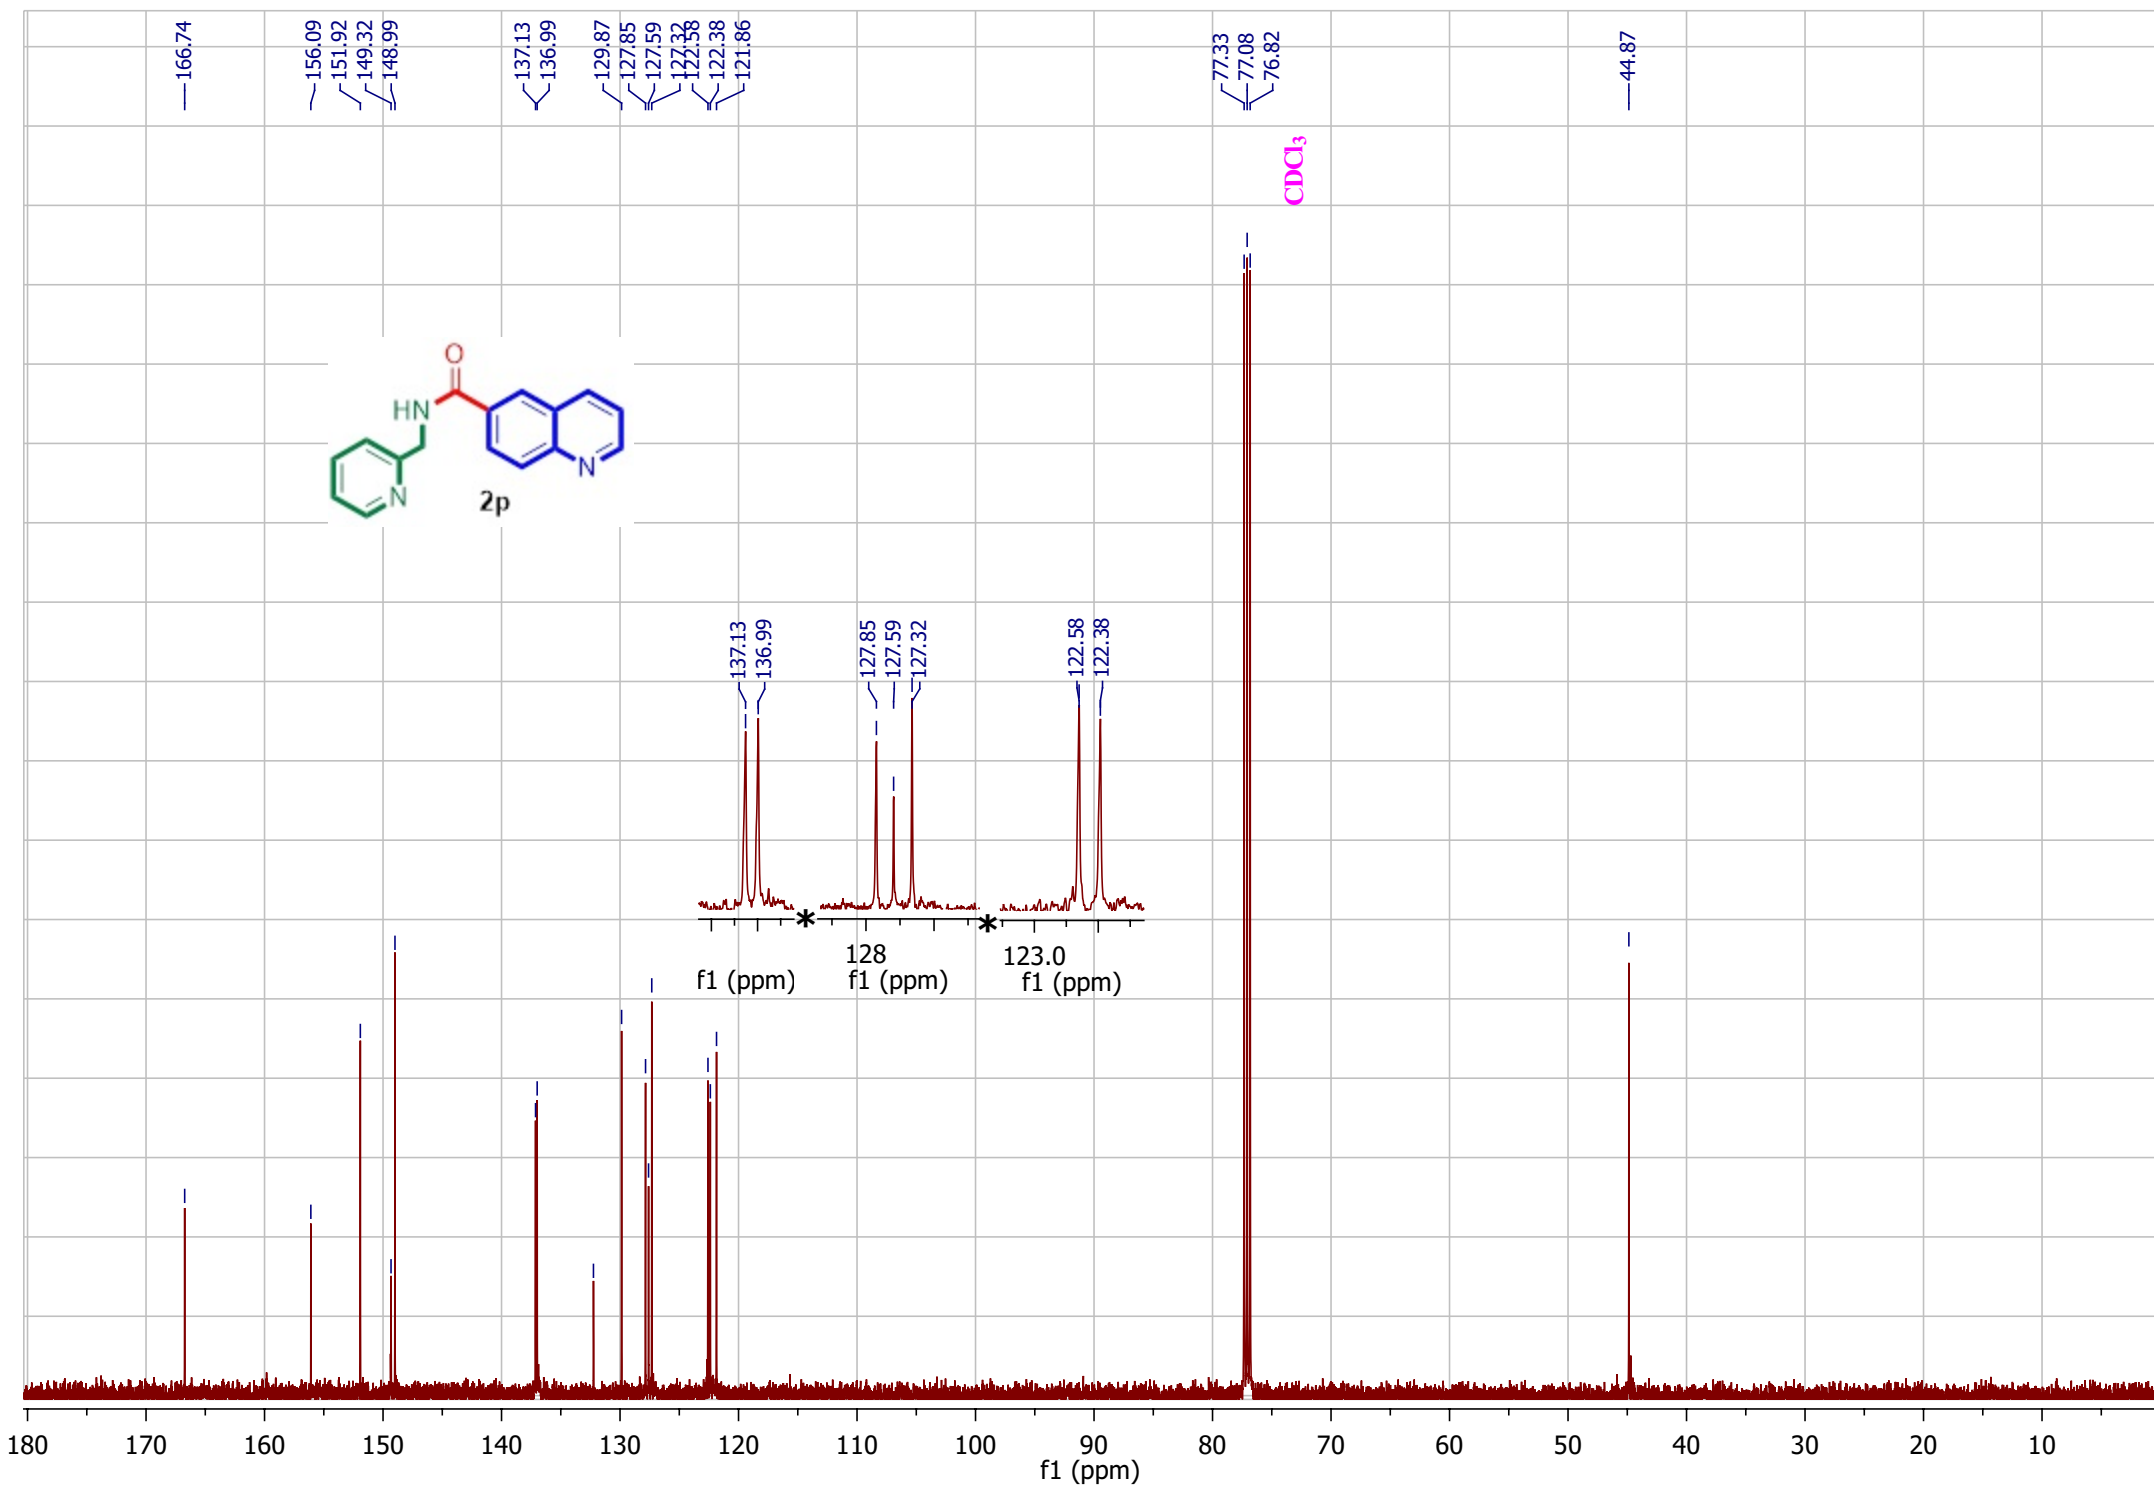

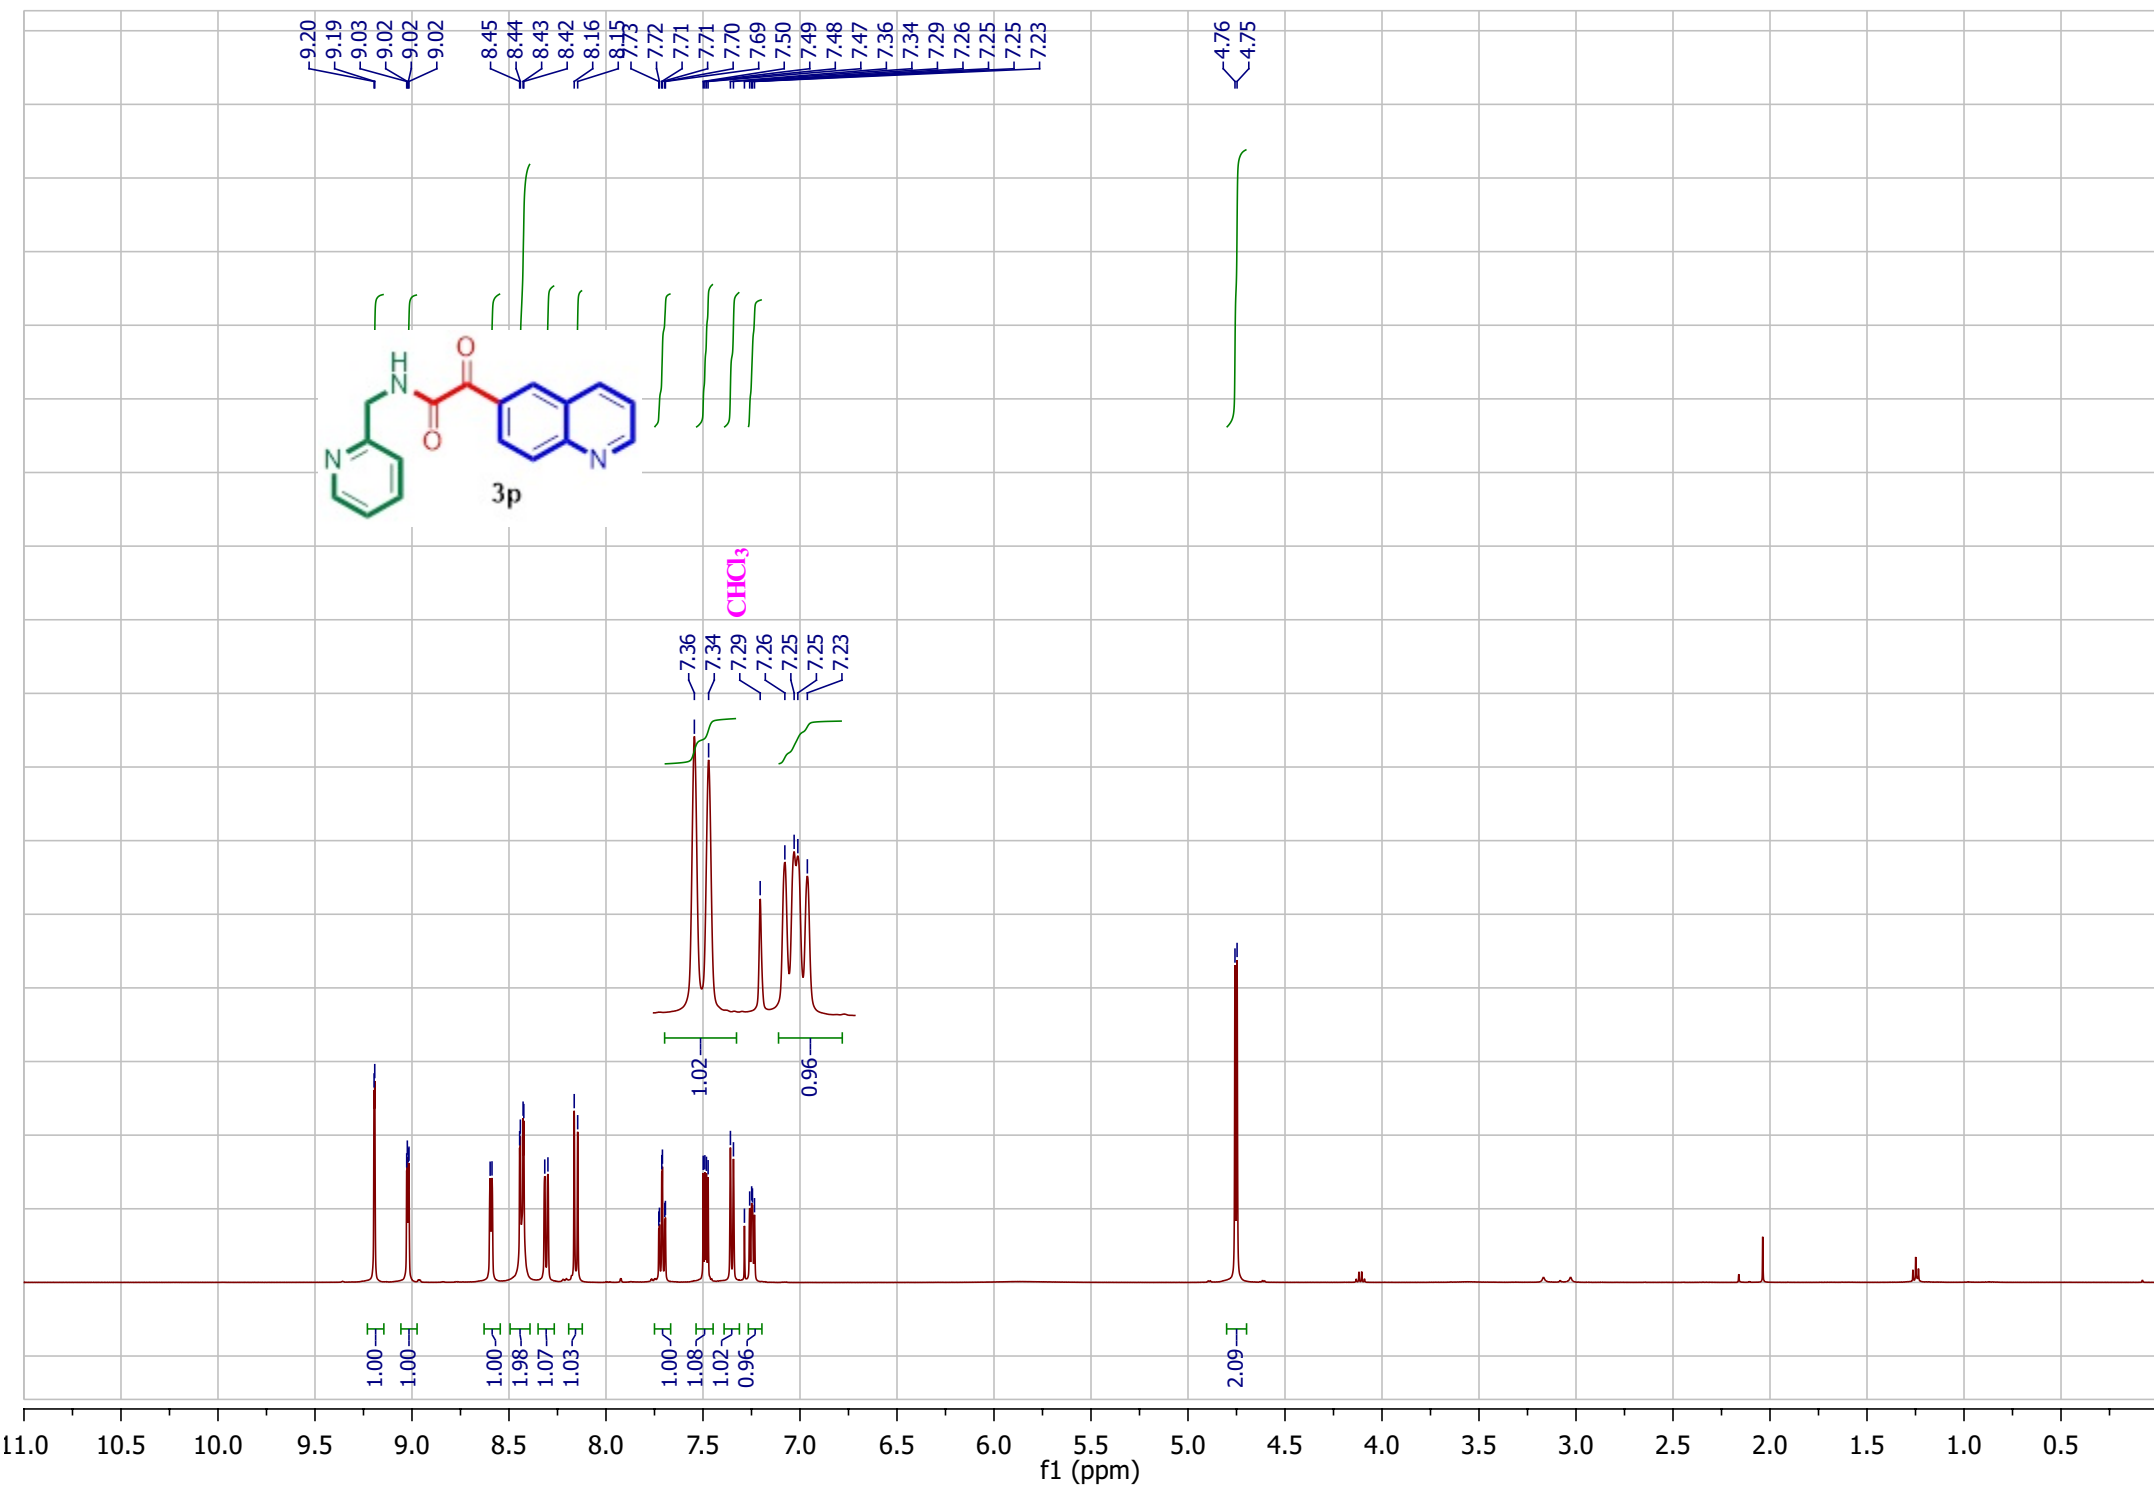



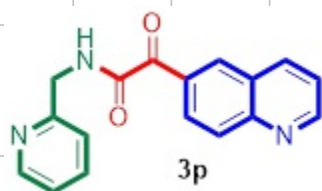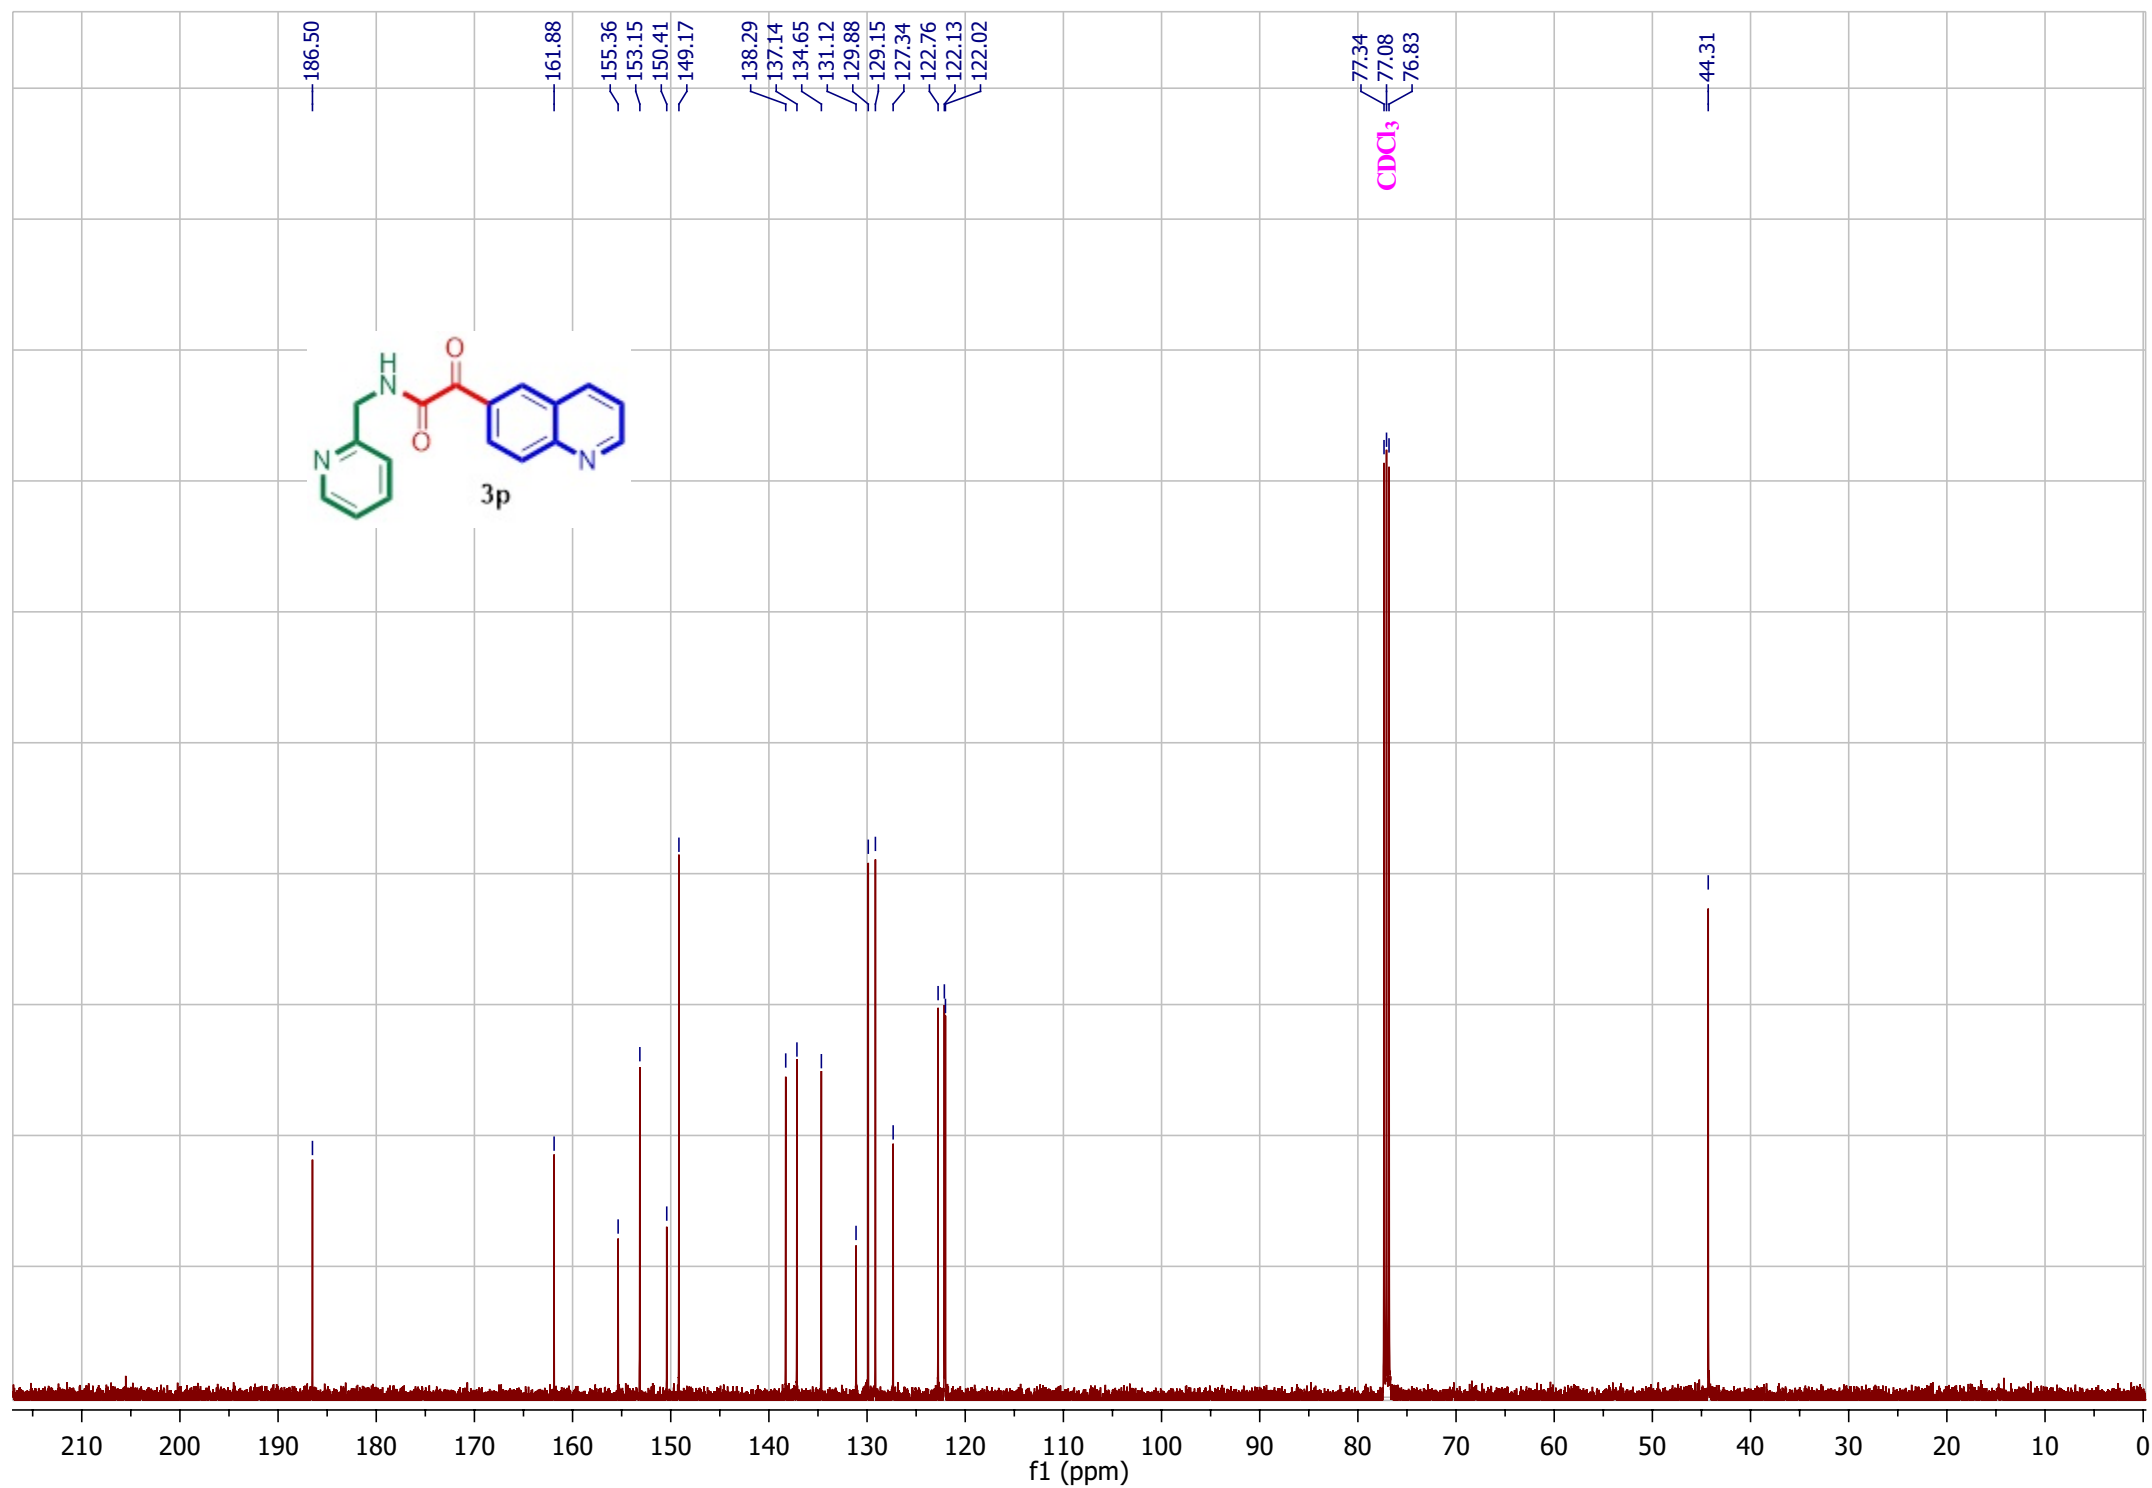

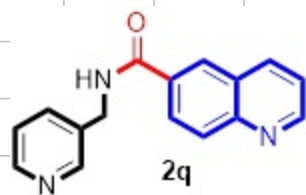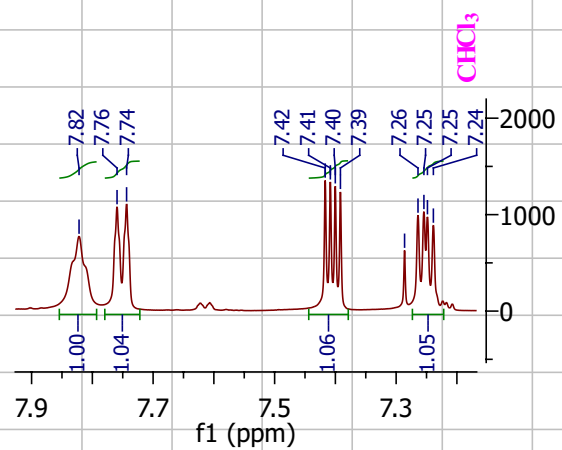

8.93  
8.92  
8.92  
8.92  
8.56  
8.36  
8.35  
8.13  
8.11  
8.09  
8.09  
8.07  
7.41  
7.40  
7.39  
7.29  
7.26  
7.25  
7.25  
7.24

4.67  
4.66

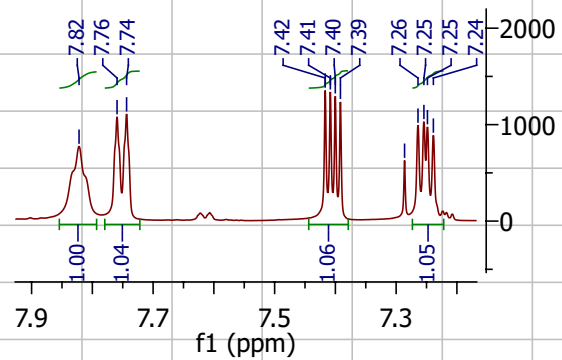

1.00  
1.02  
1.18  
1.00  
3.21  
1.00  
1.04

1.06  
1.05

2.08

11.5 11.0 10.5 10.0 9.5 9.0 8.5 8.0 7.5 7.0 6.5 6.0 5.5 5.0 4.5 4.0 3.5 3.0 2.5 2.0 1.5 1.0 0.5

f1 (ppm)

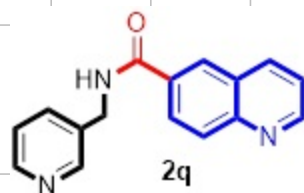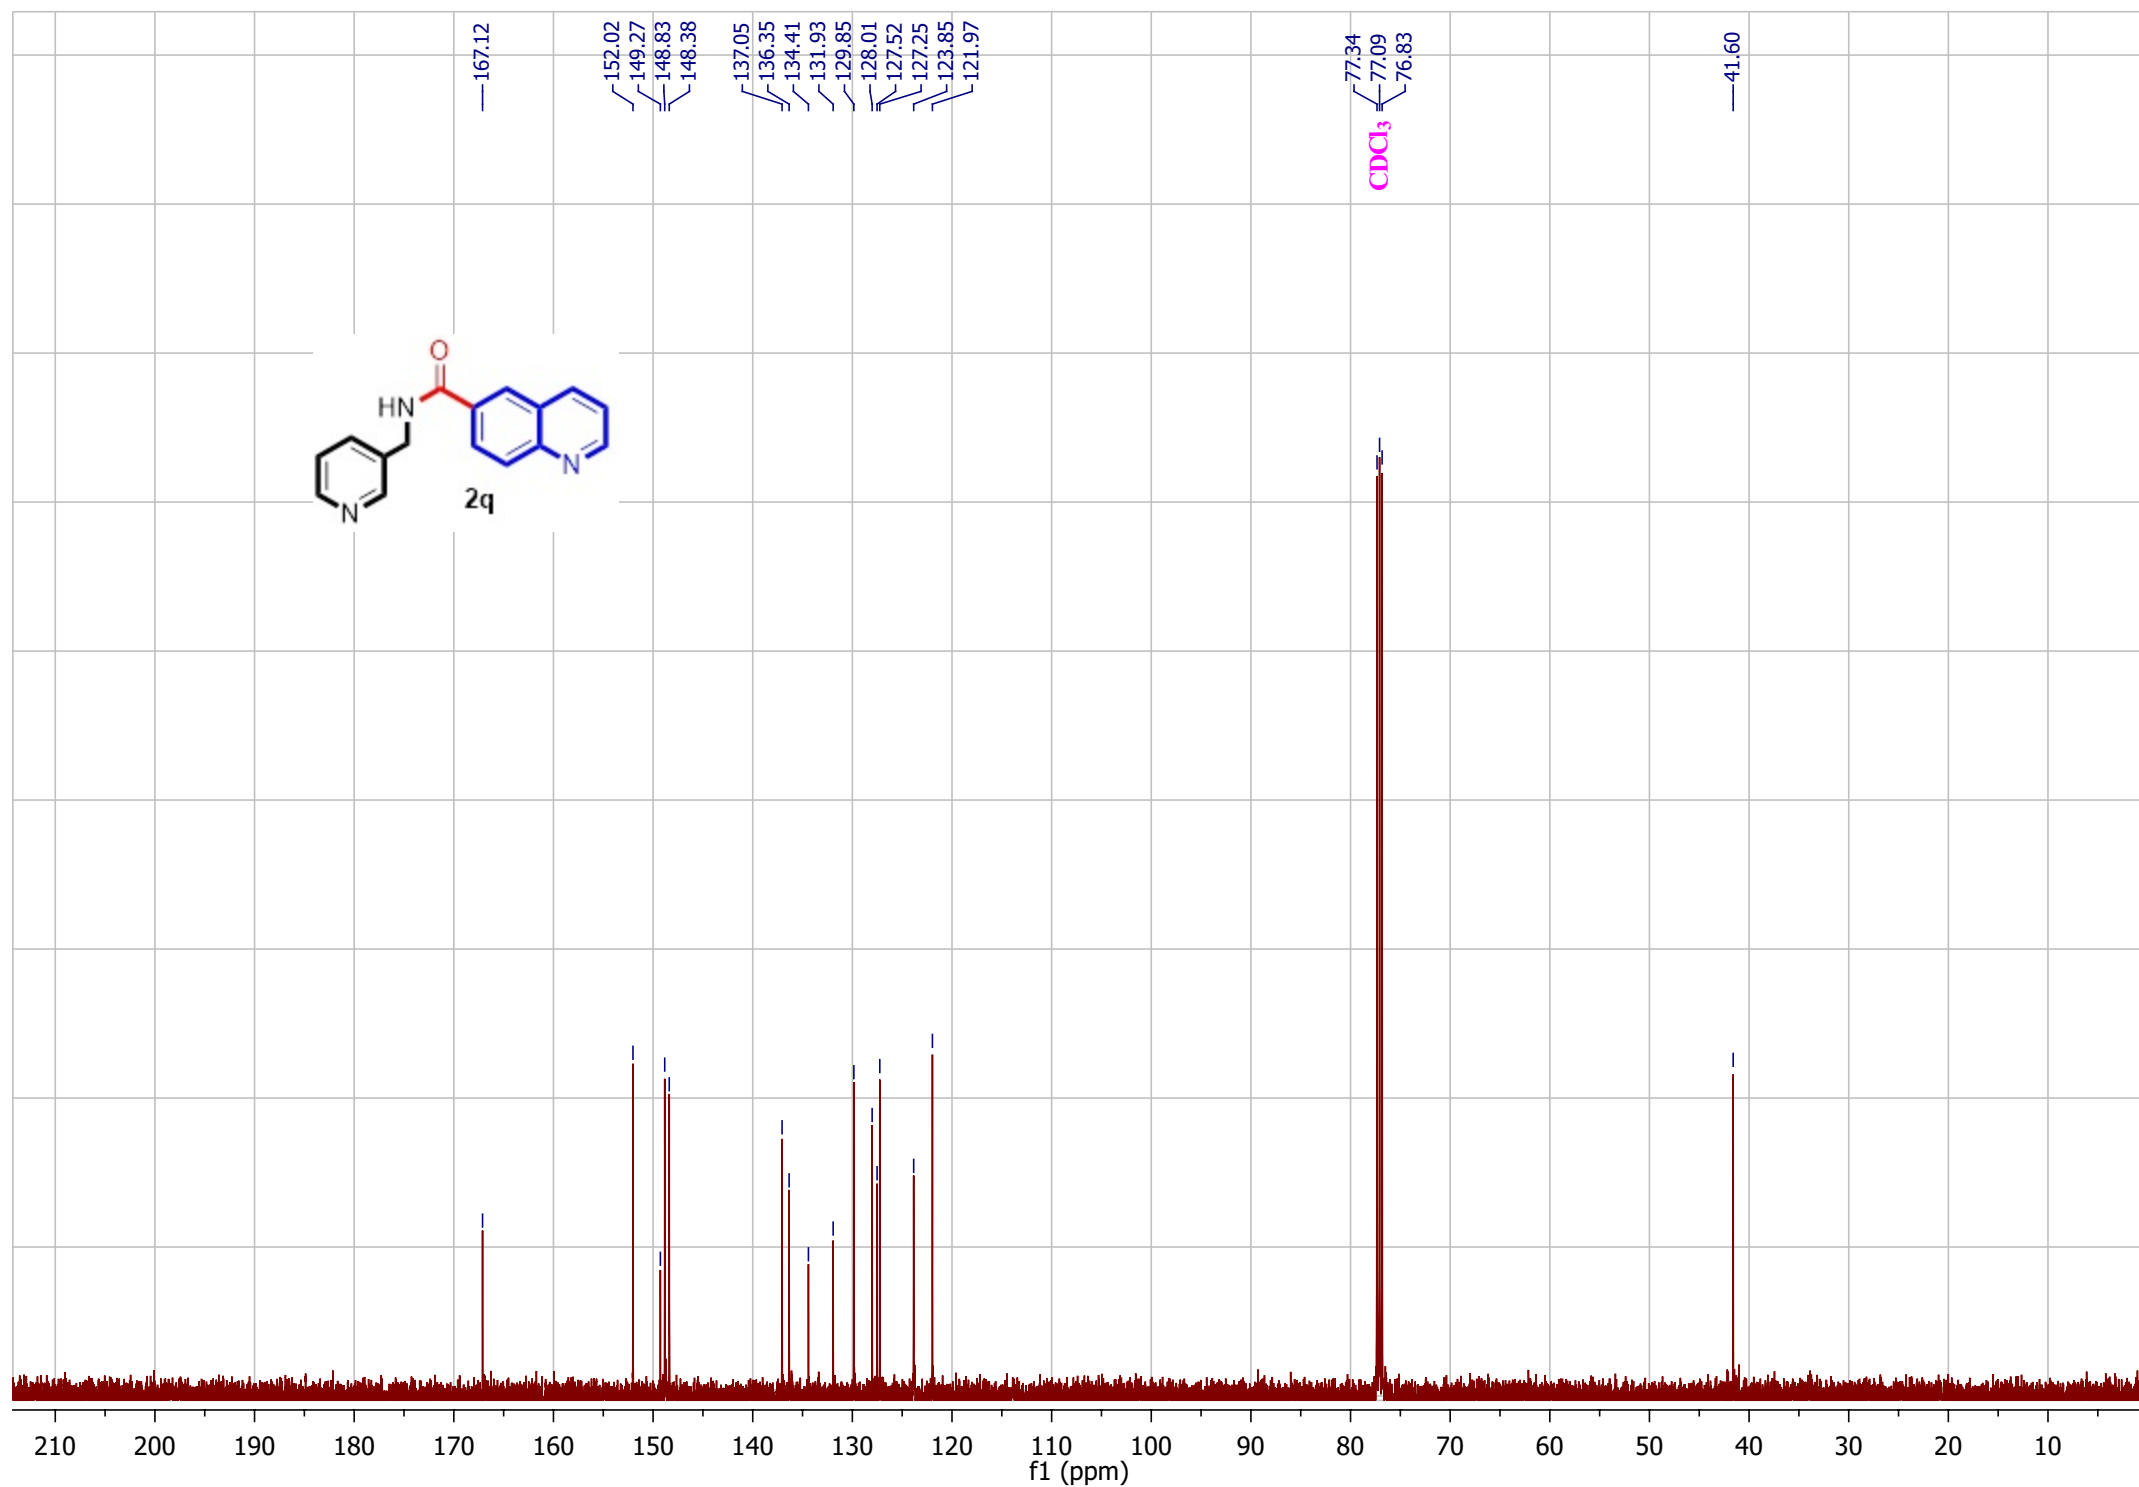

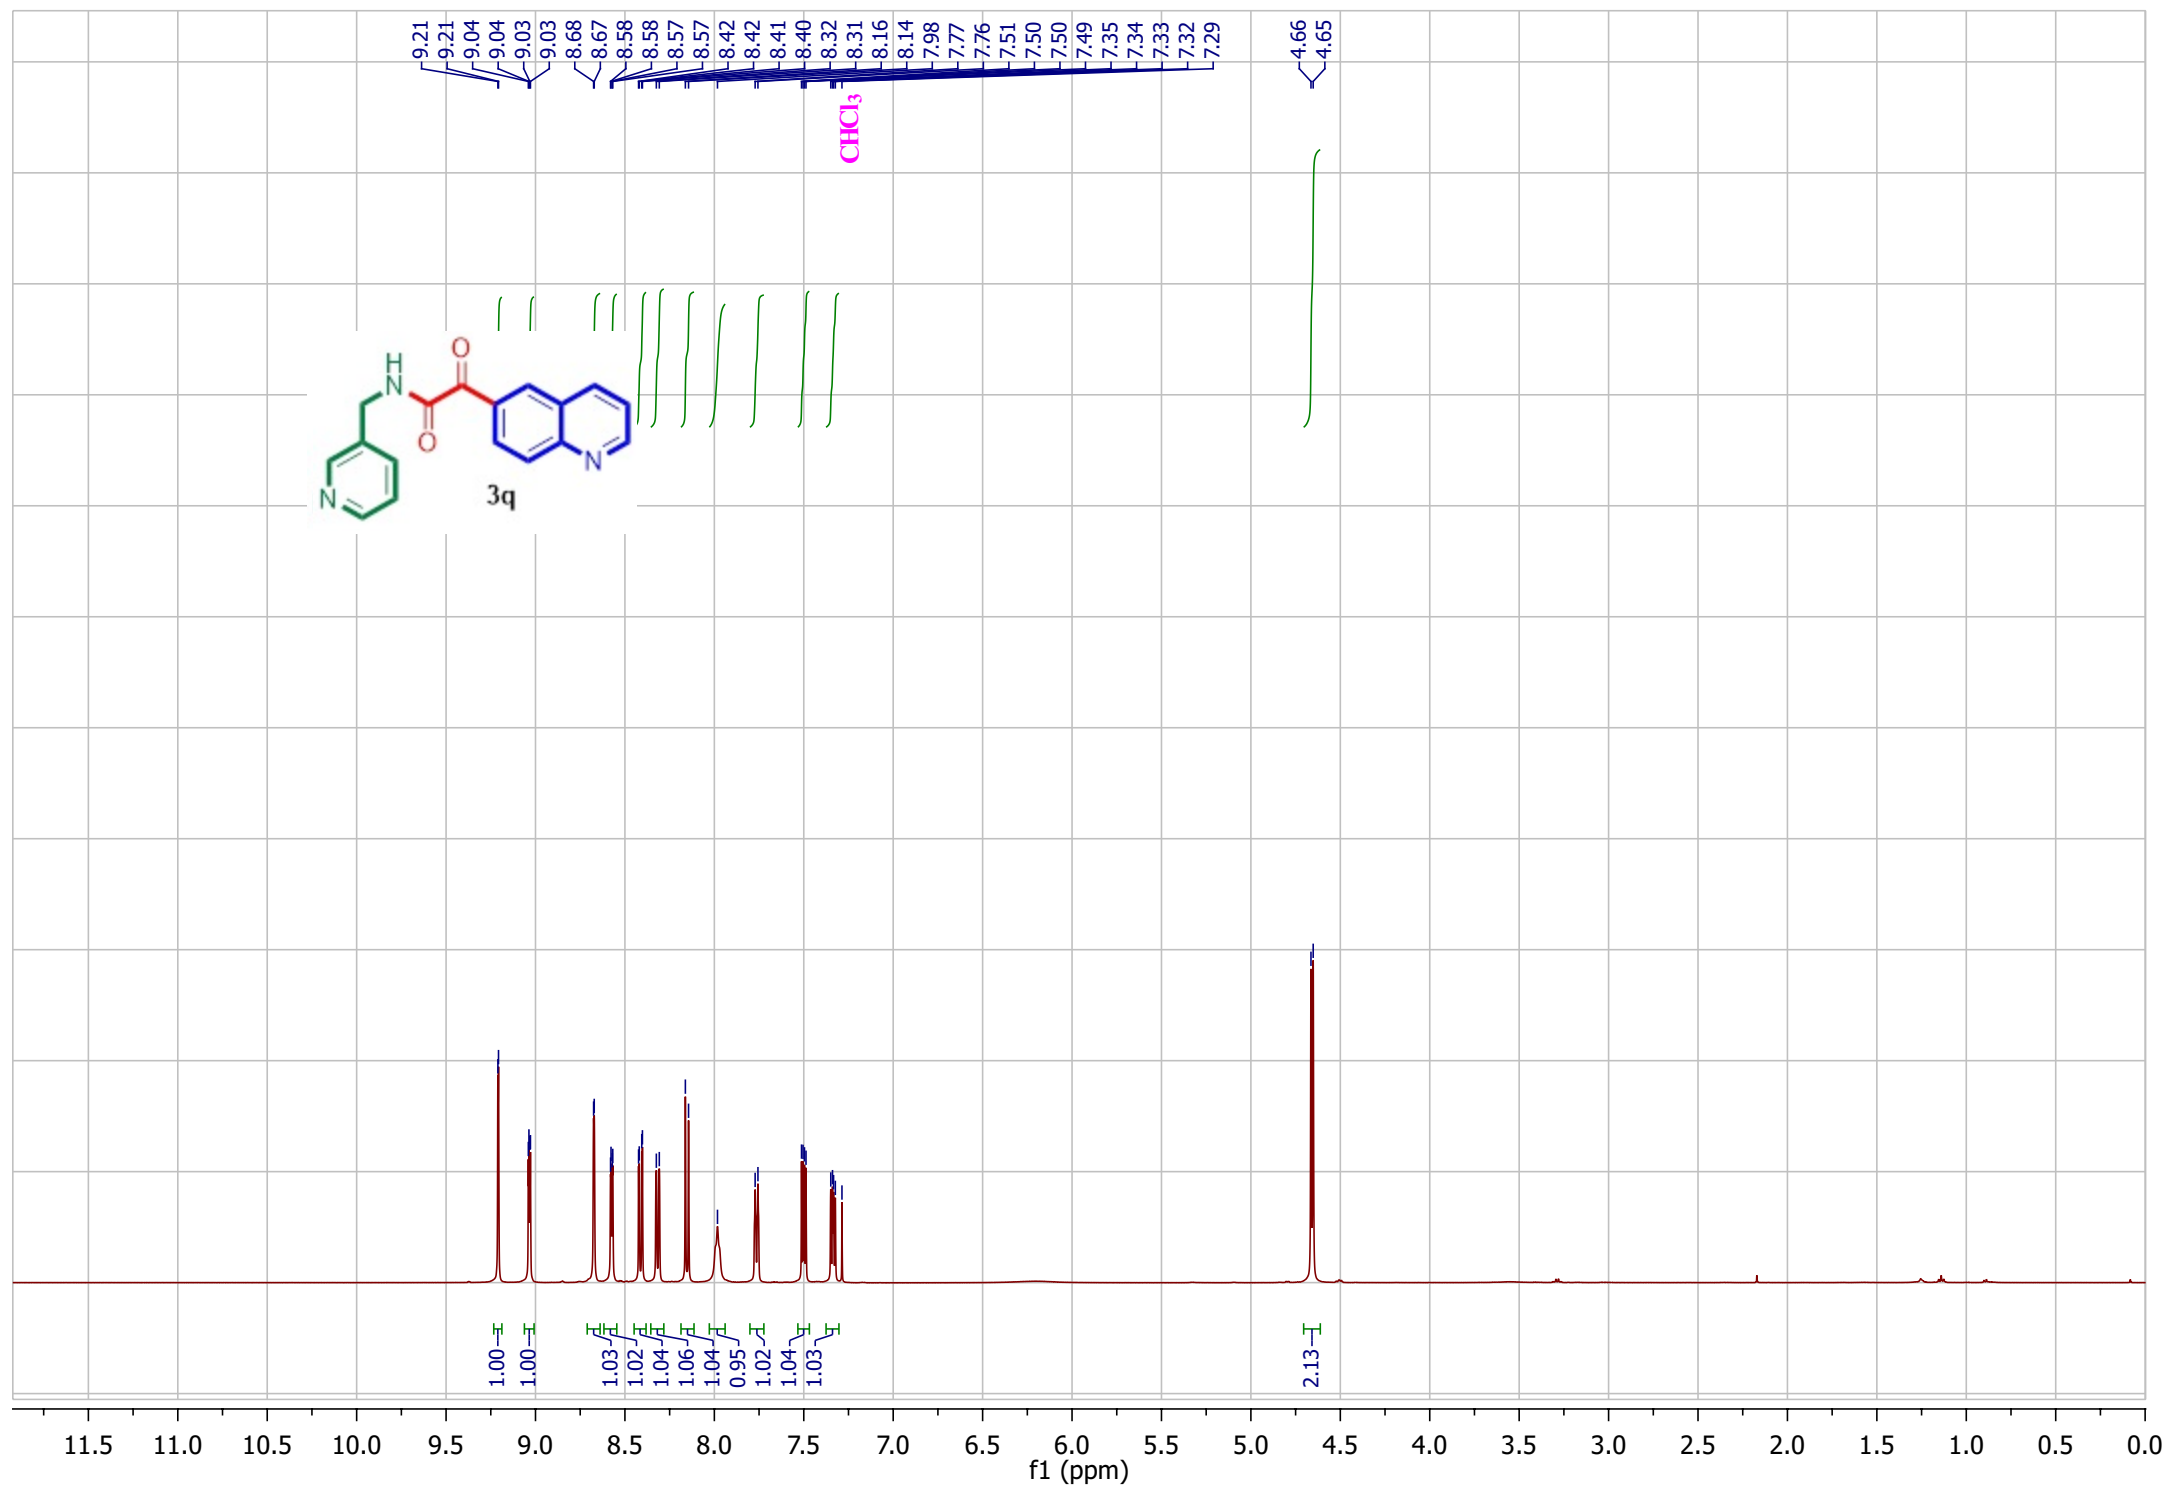

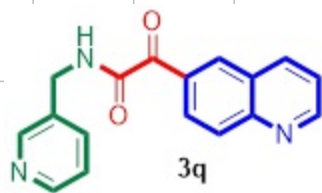

—186.24

—161.74

—153.39

—150.57

—148.91

—148.78

—138.24

—136.19

—134.86

—133.22

—130.86

—130.06

—129.03

—127.33

—123.88

—122.12

77.33

77.07

76.82

CDCl<sub>3</sub>

—41.01

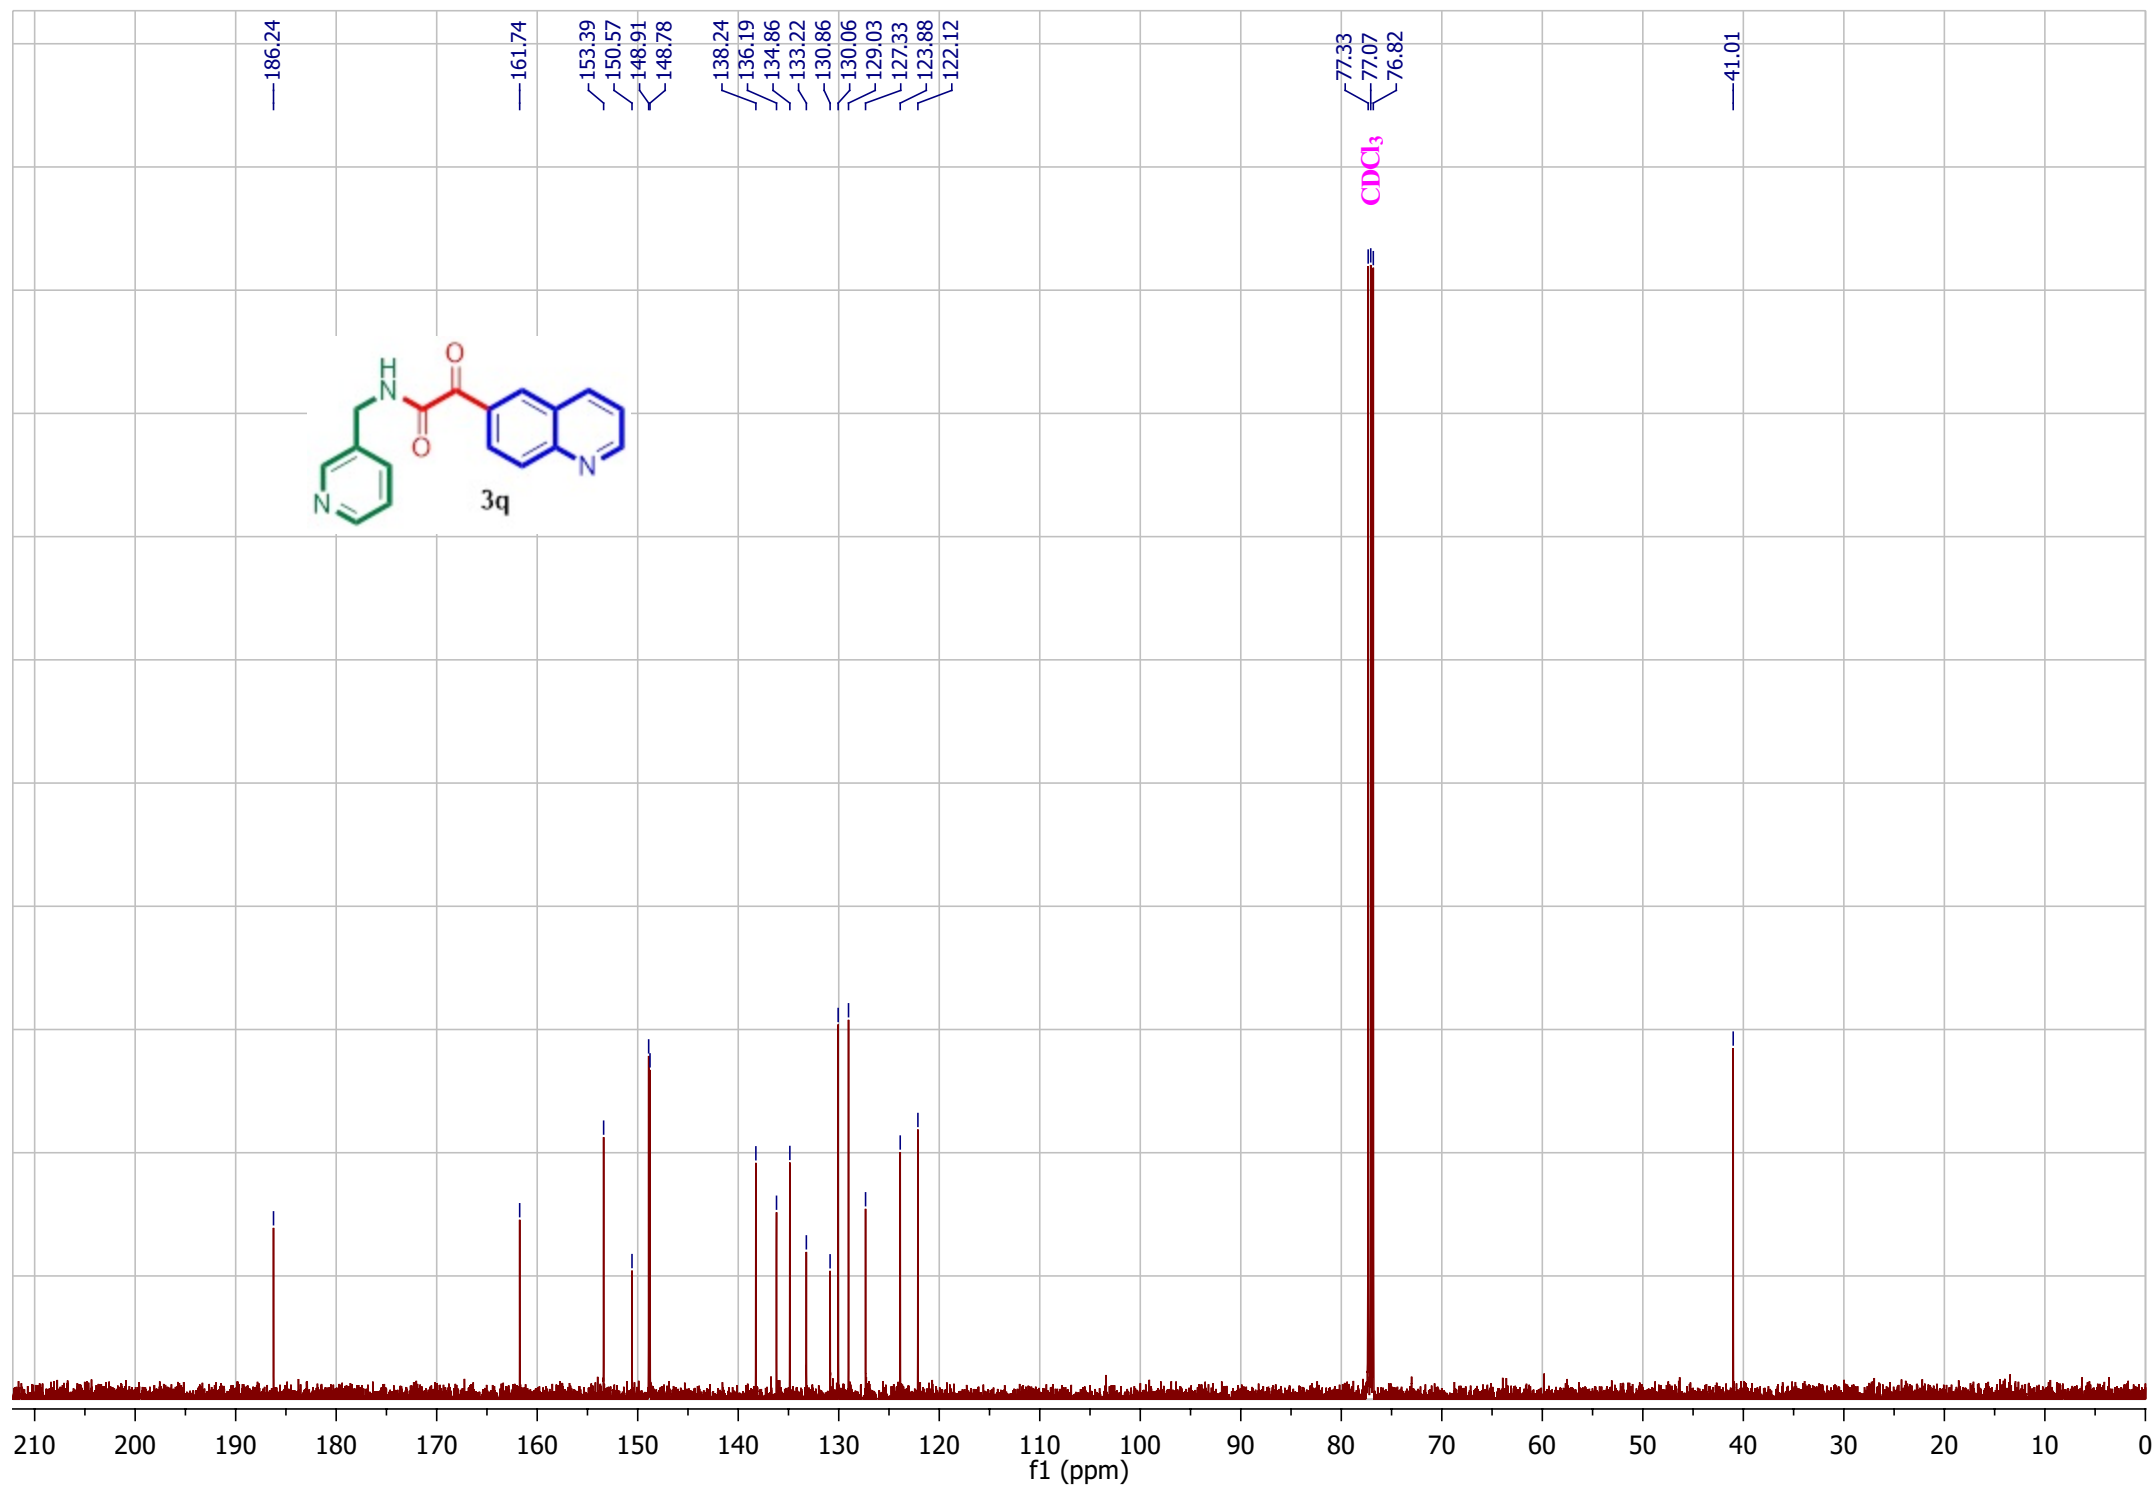

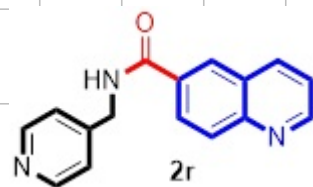

2r

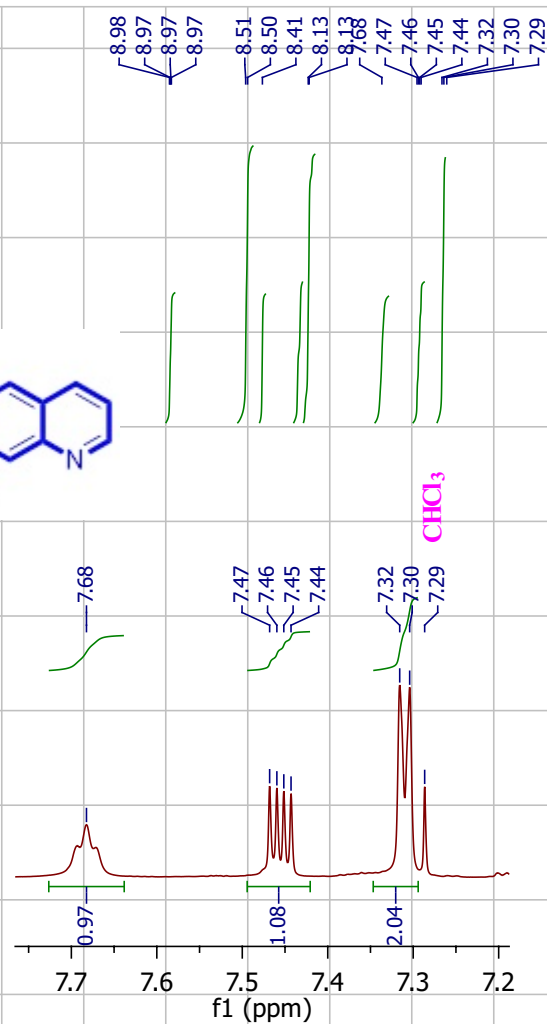

8.98  
8.97  
8.97  
8.97  
8.51  
8.50  
8.41  
8.13  
8.13  
7.68  
7.47  
7.46  
7.45  
7.44  
7.32  
7.30  
7.29

4.72  
4.70

CHCl<sub>3</sub>

f1 (ppm)

f1 (ppm)

1.00

2.12

0.99

1.08

2.06

0.97

1.08

2.04

2.08

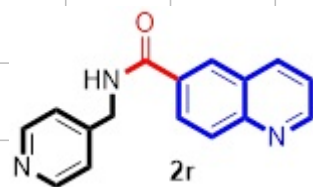

167.18

152.13

149.33

149.20

148.53

137.13

131.74

129.99

128.12

127.58

127.17

122.67

122.07

77.31

77.06

76.81

42.99

CDCl<sub>3</sub>

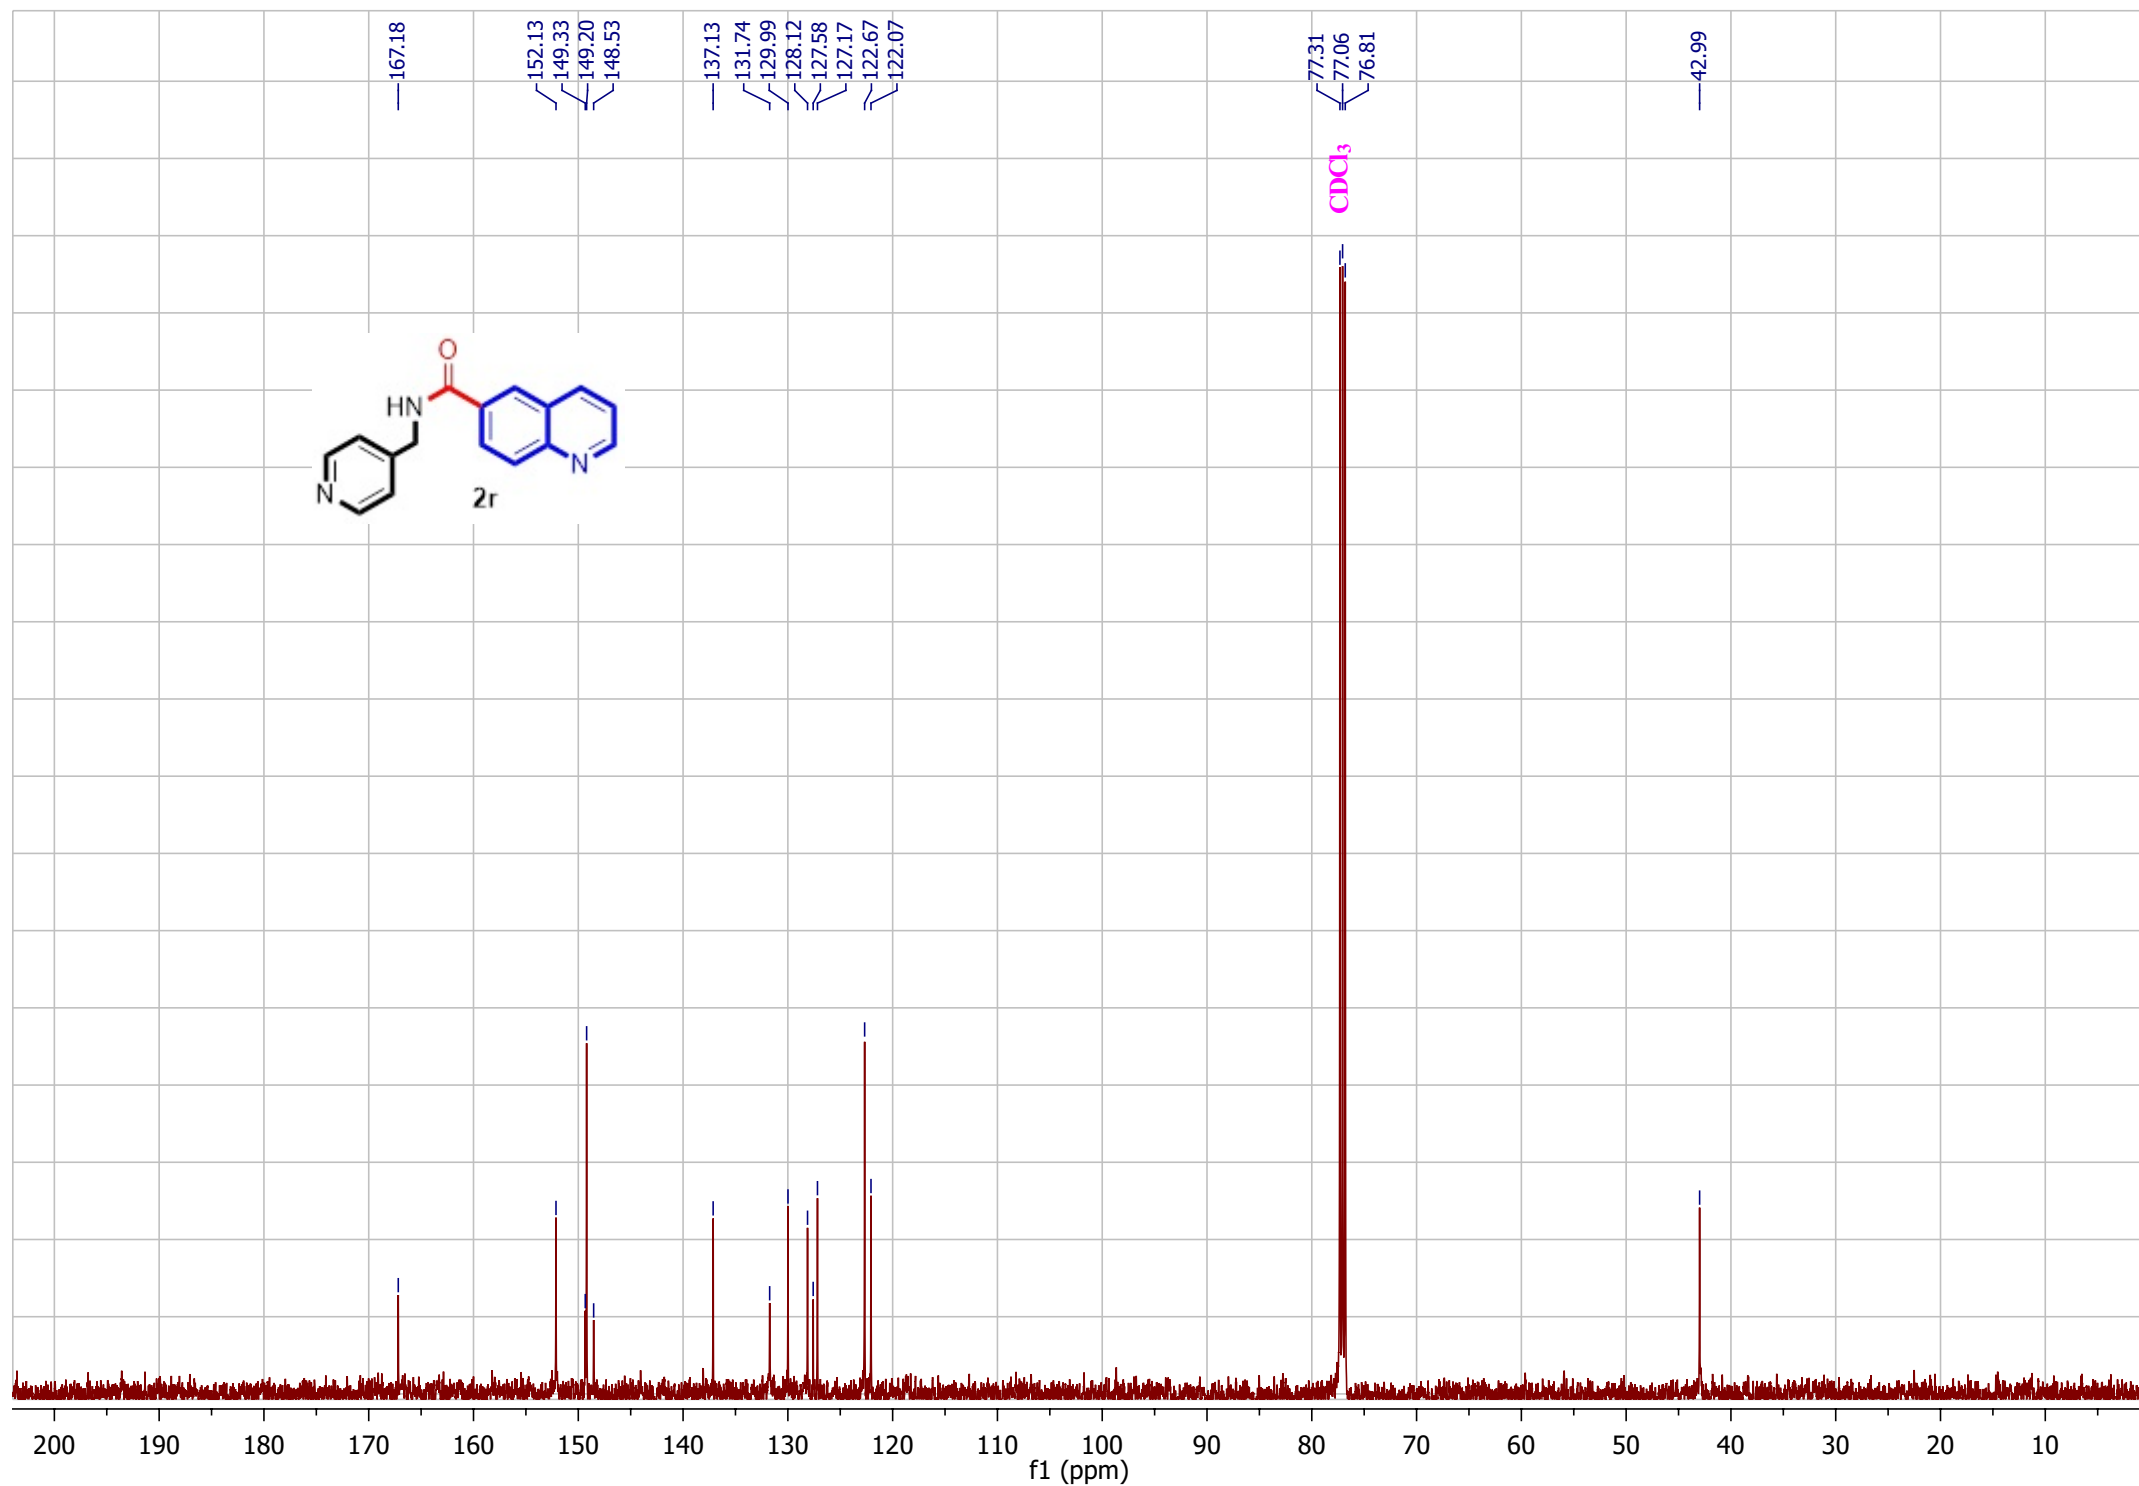

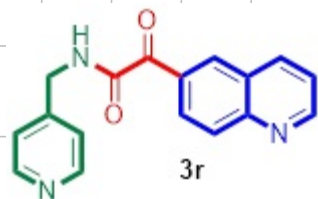

3r

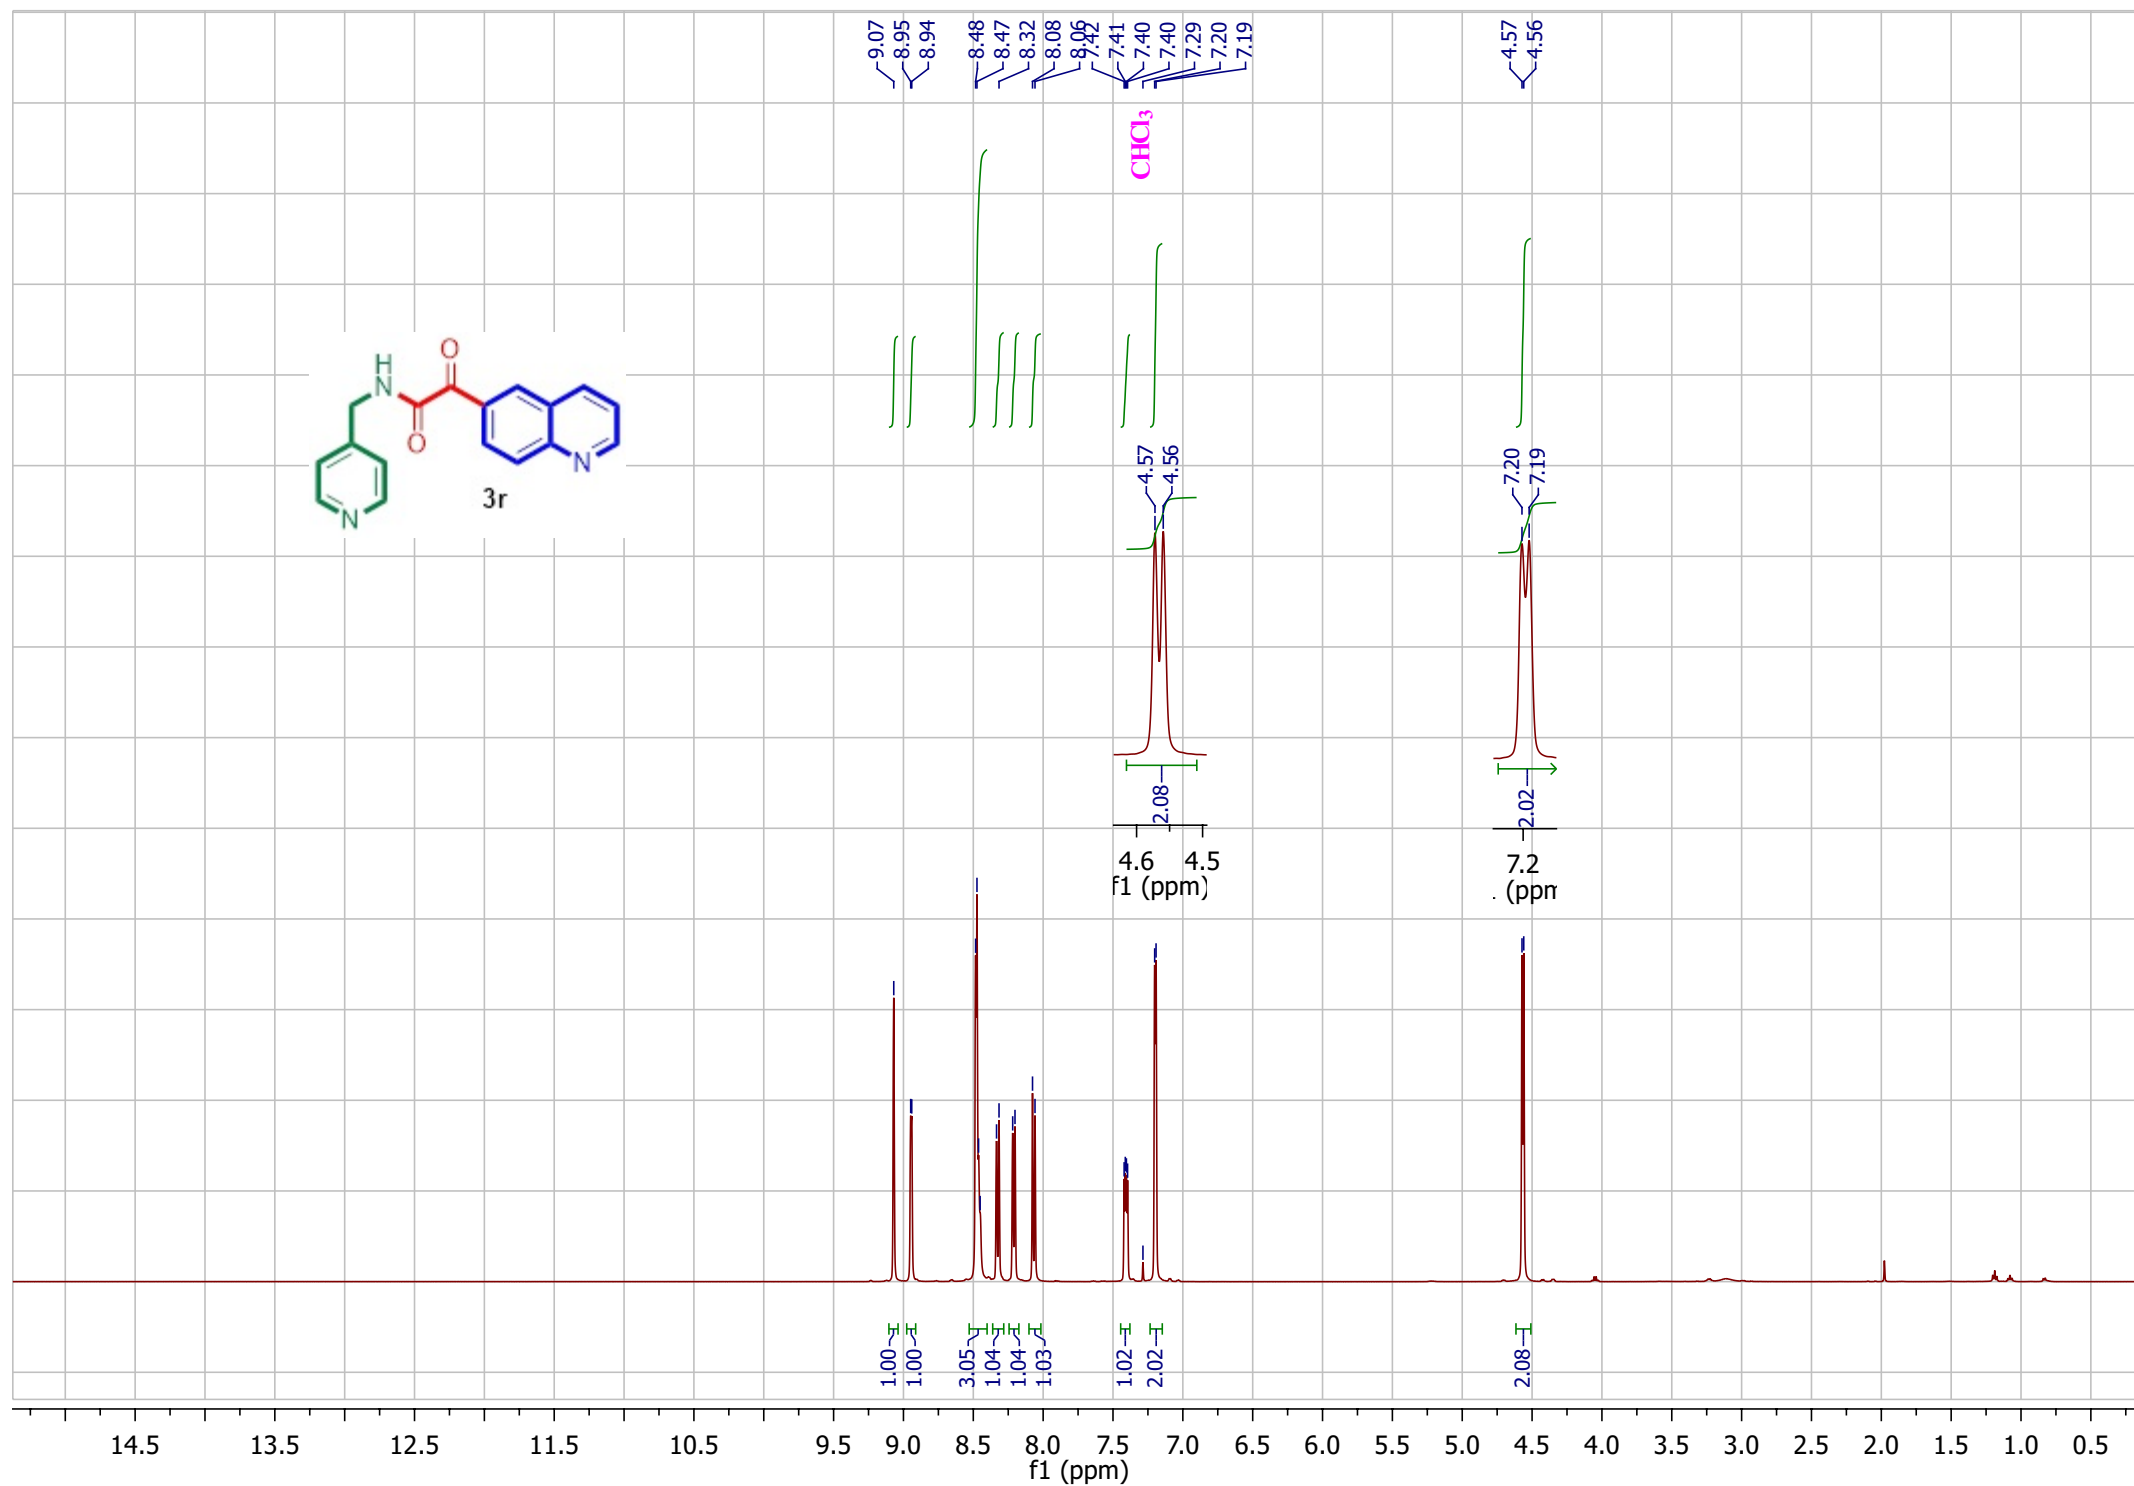



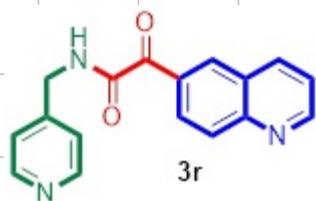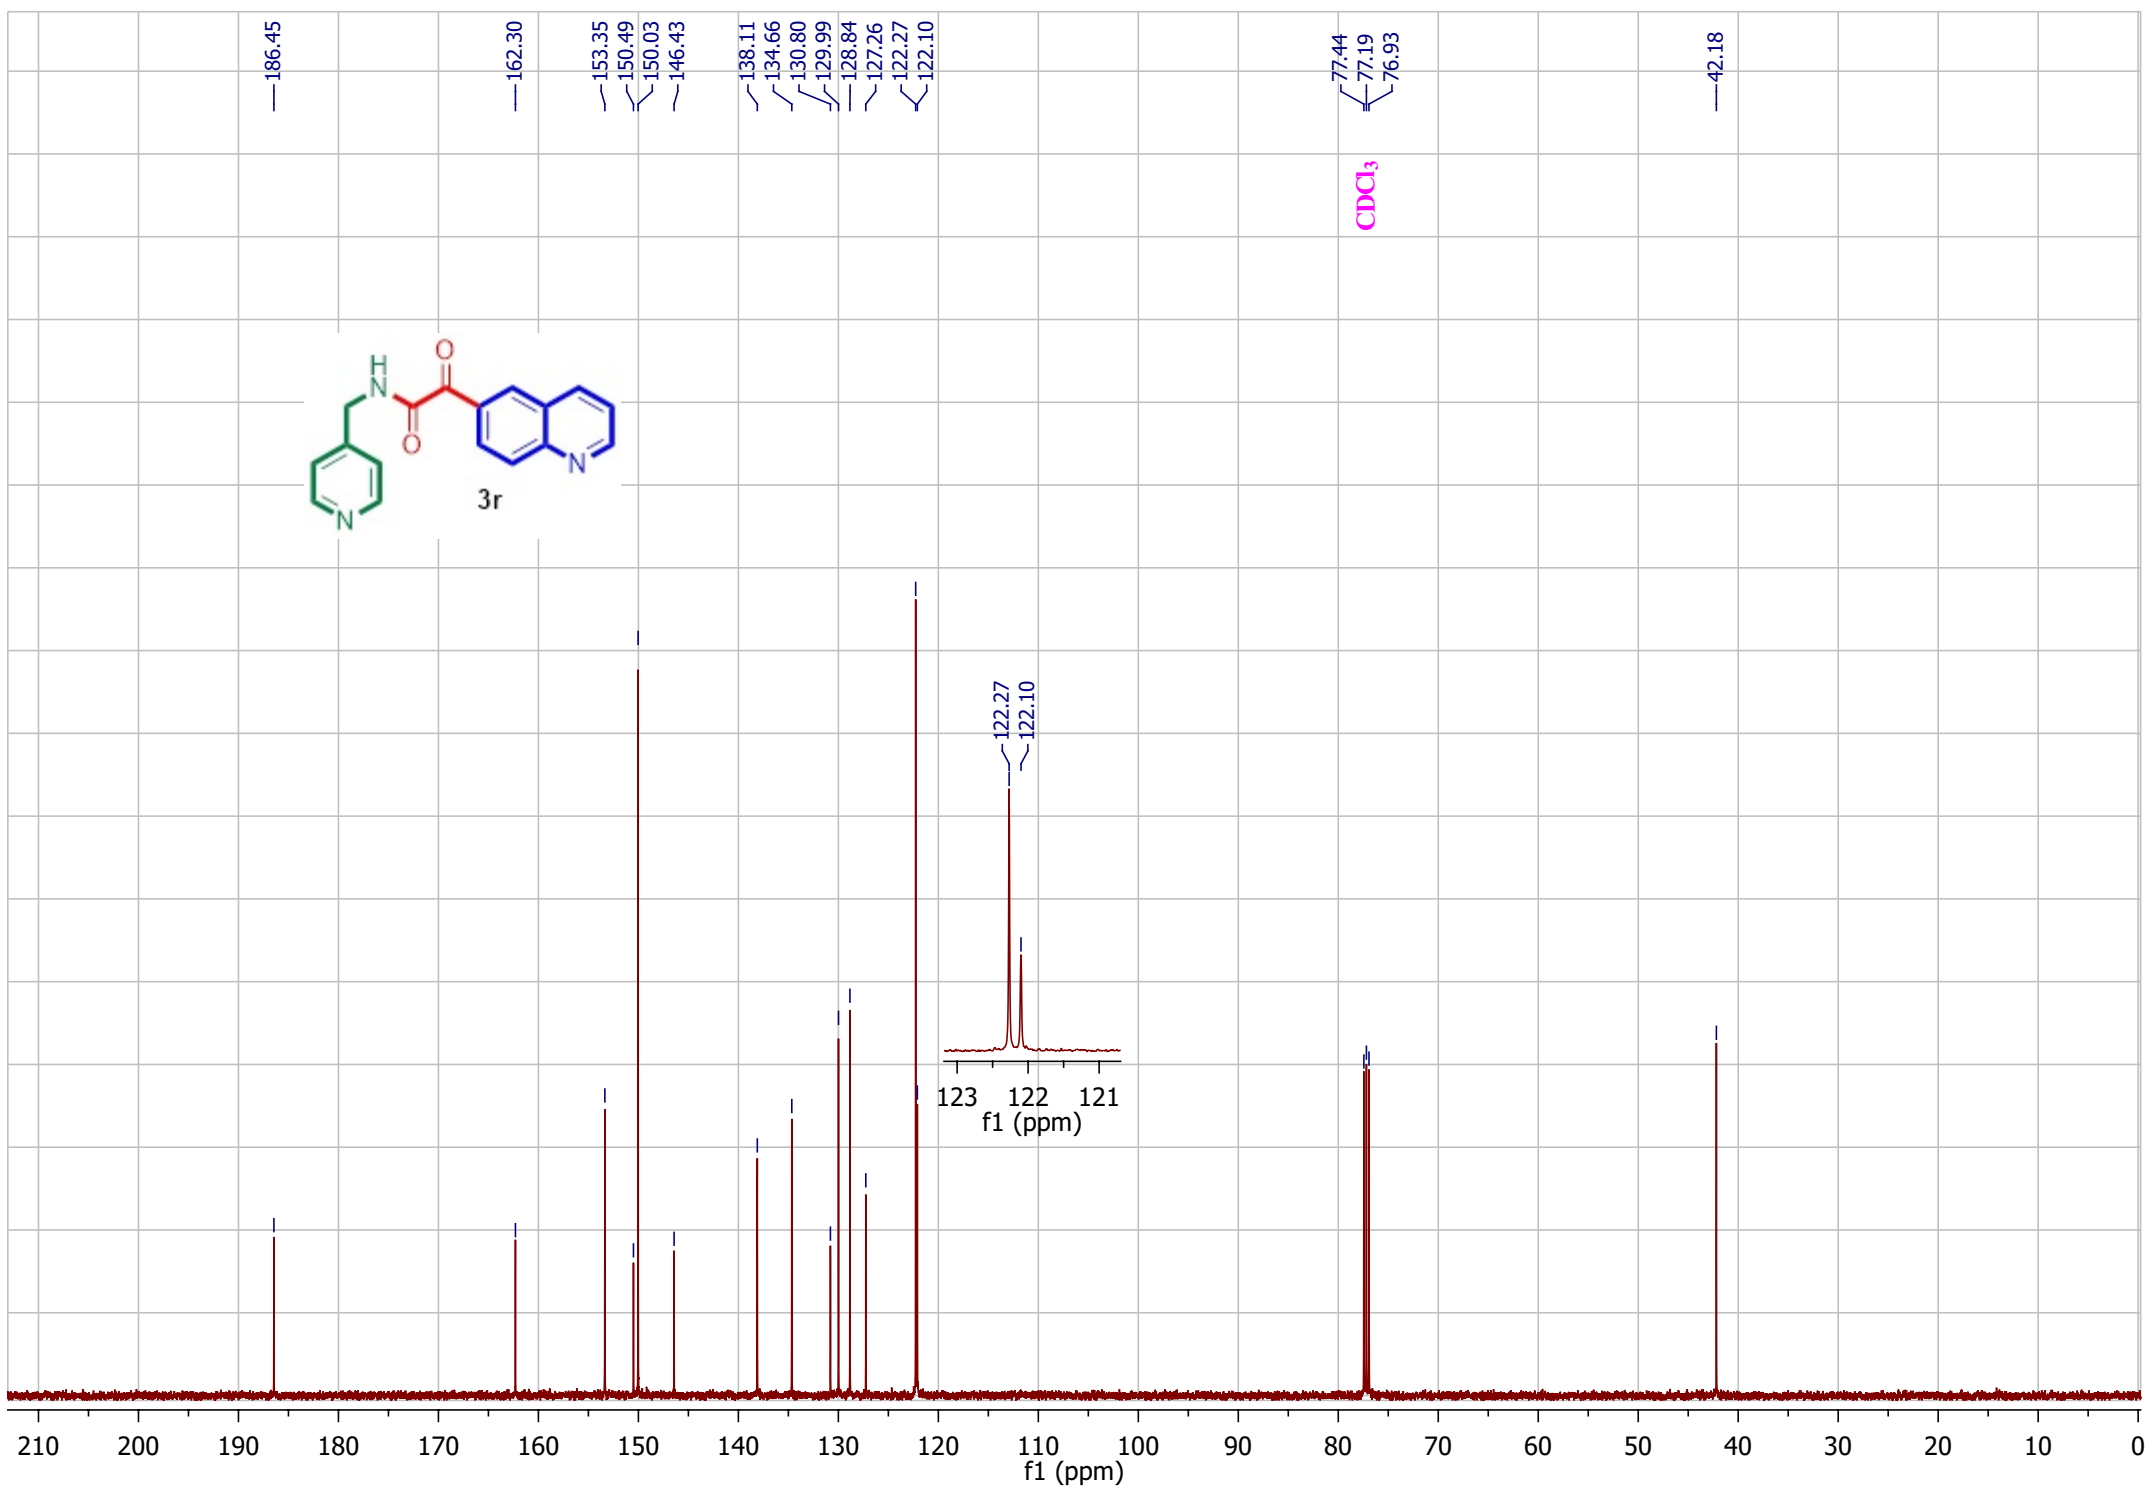

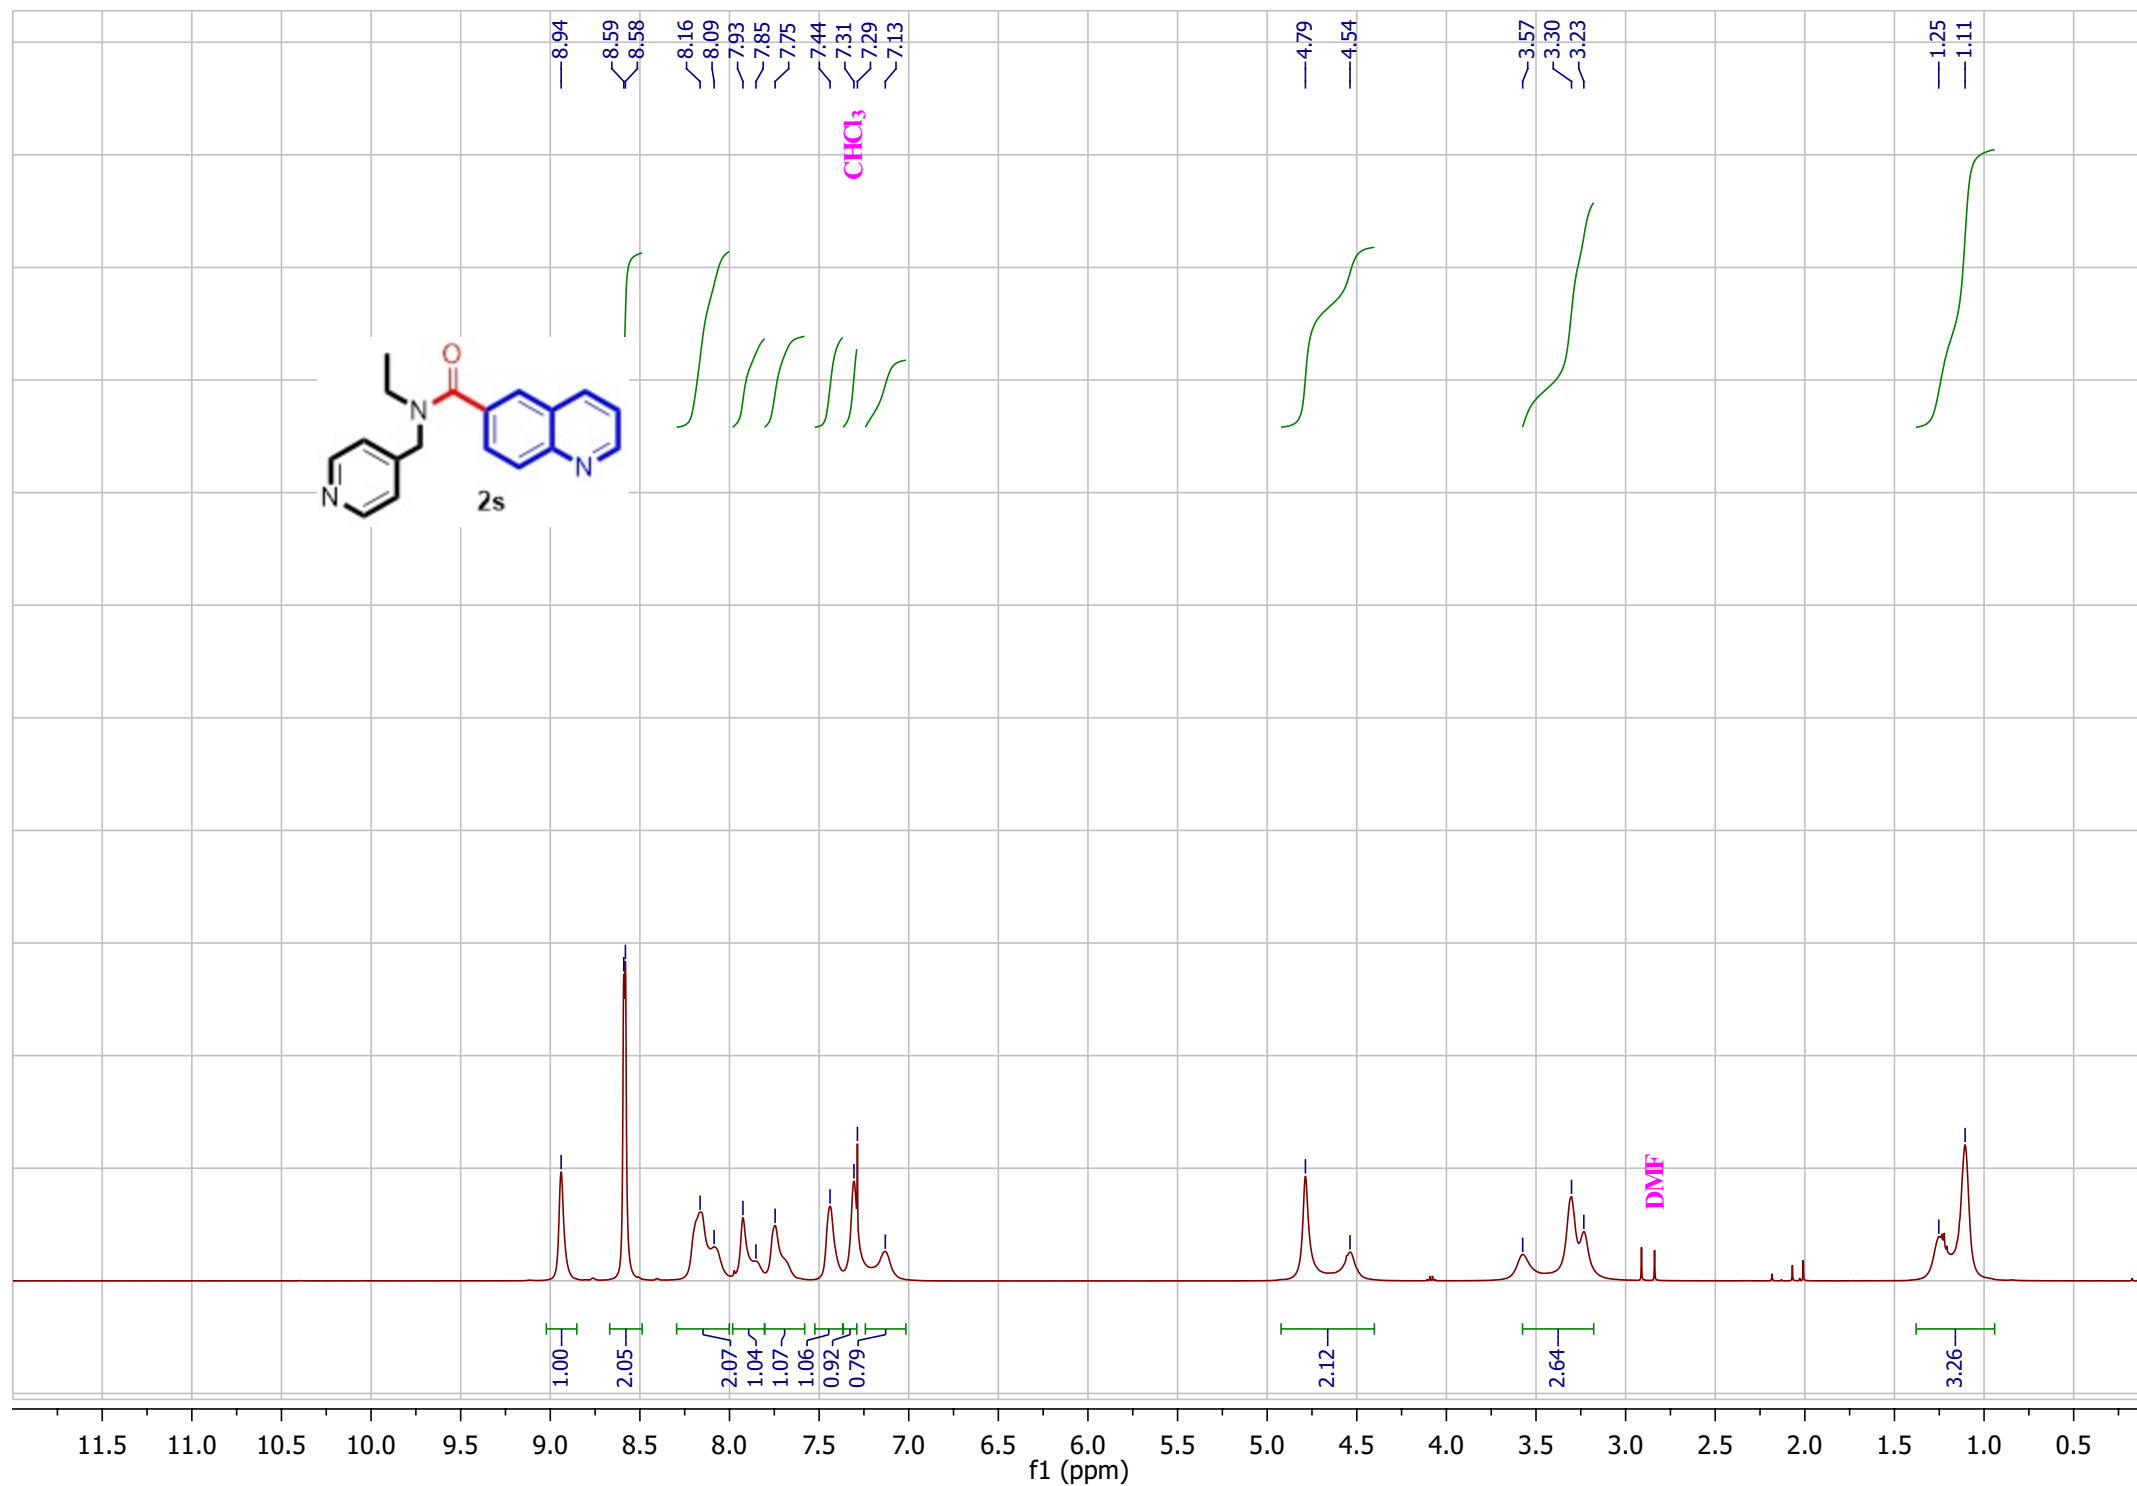

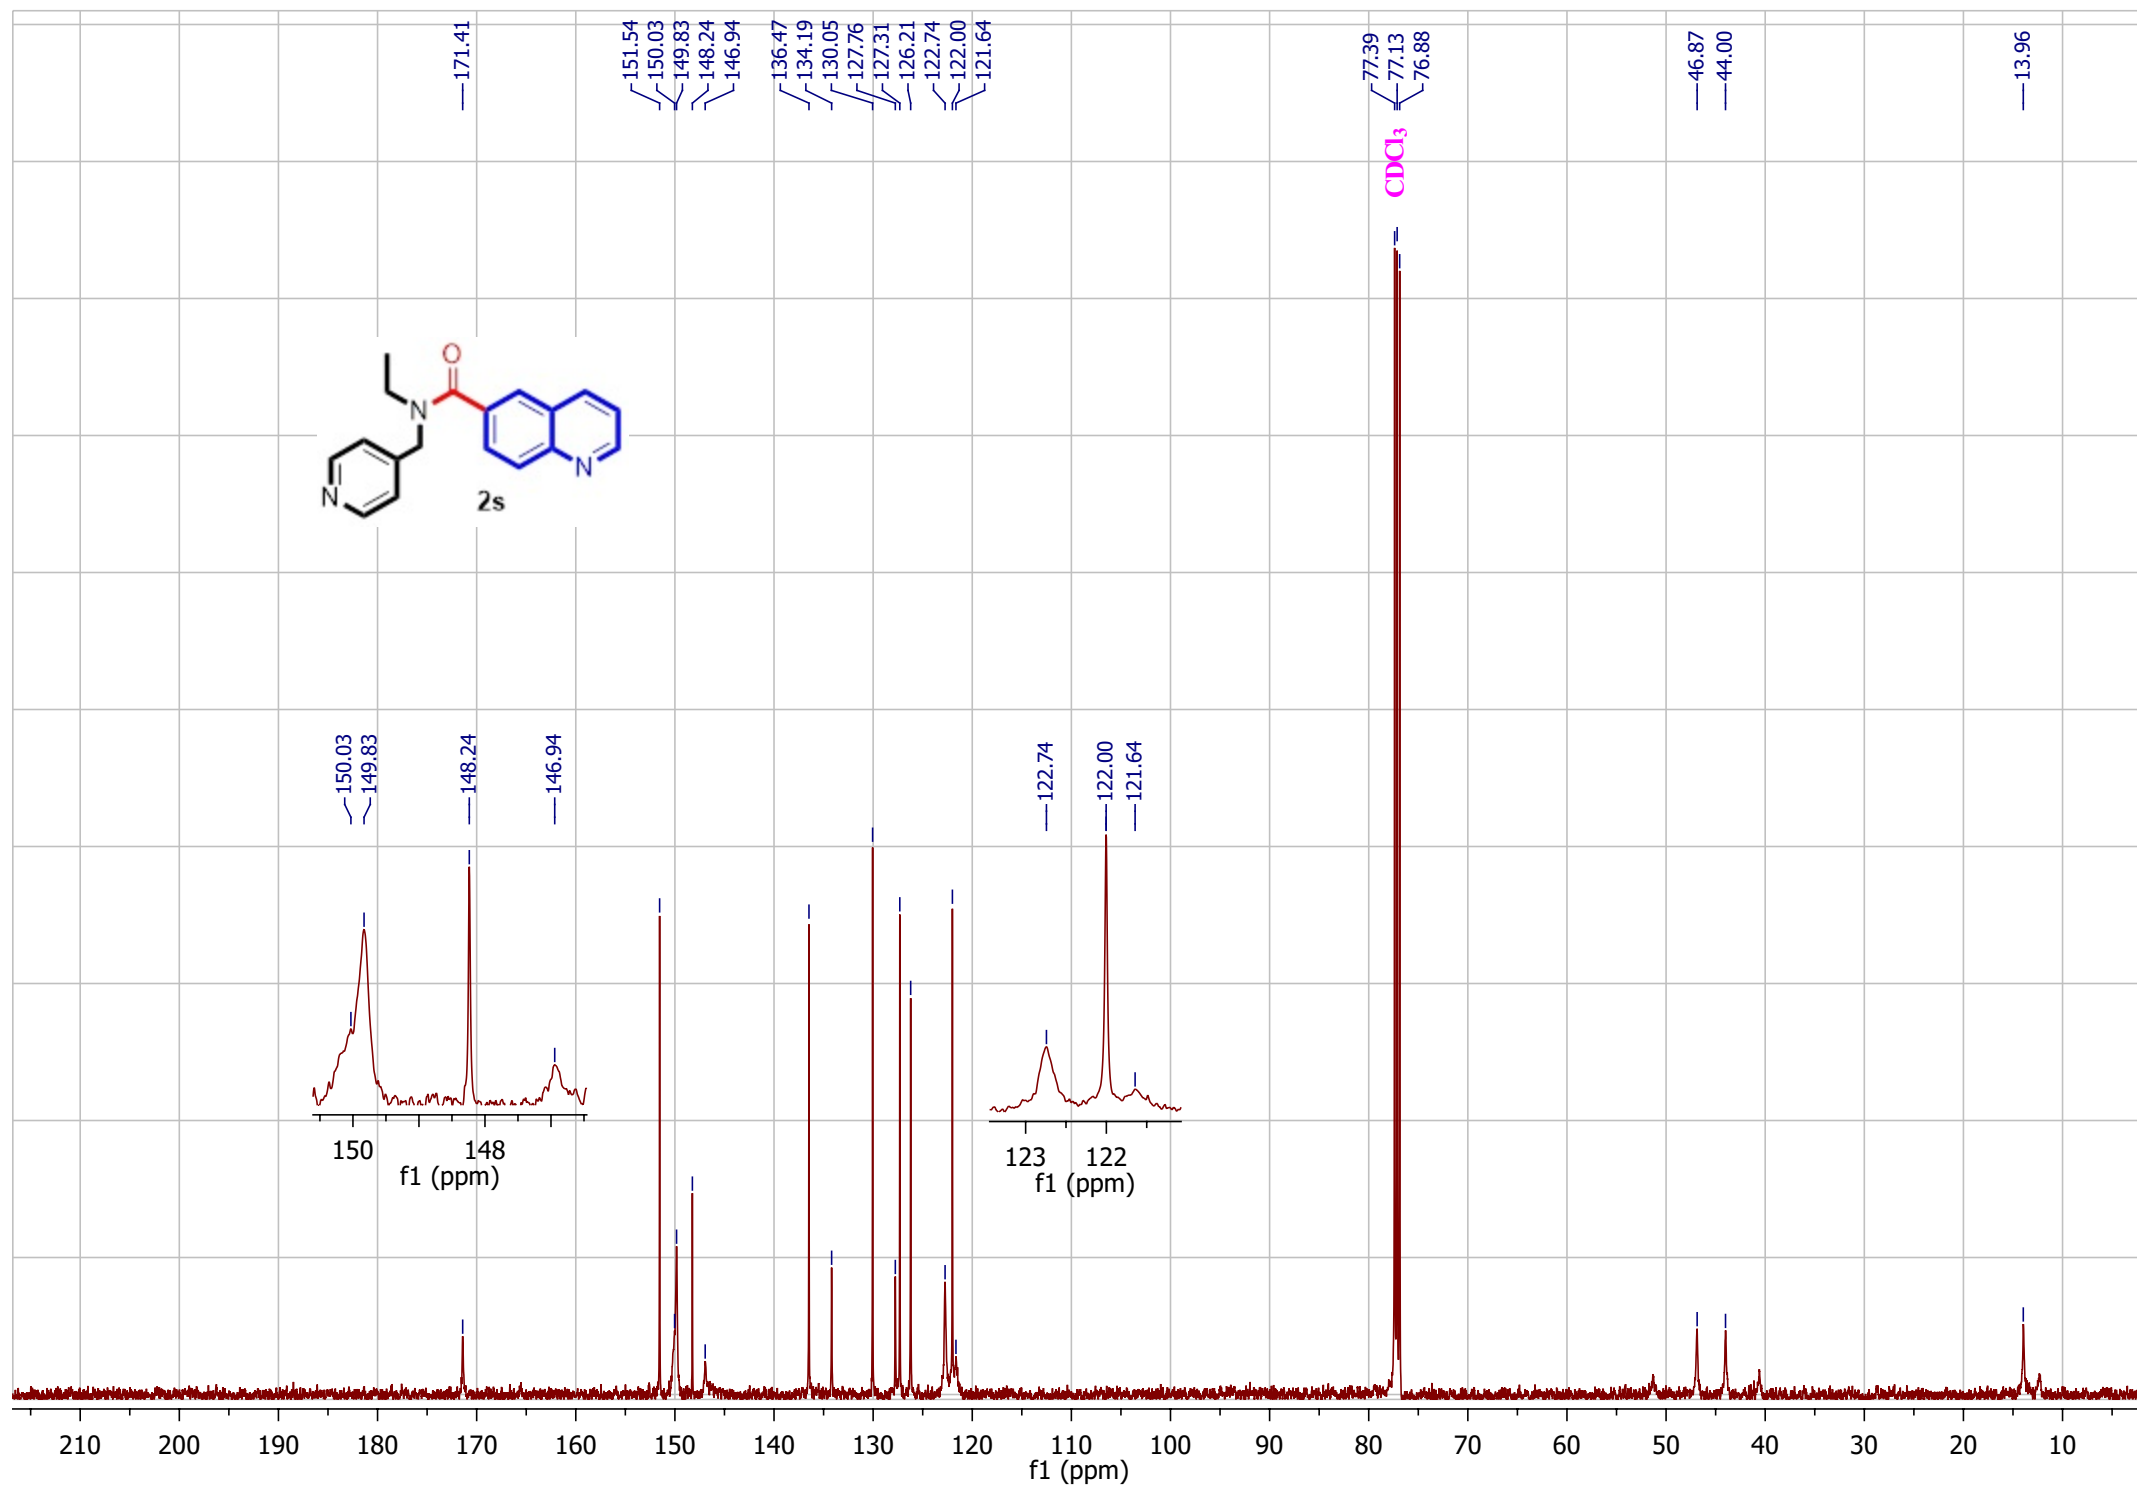

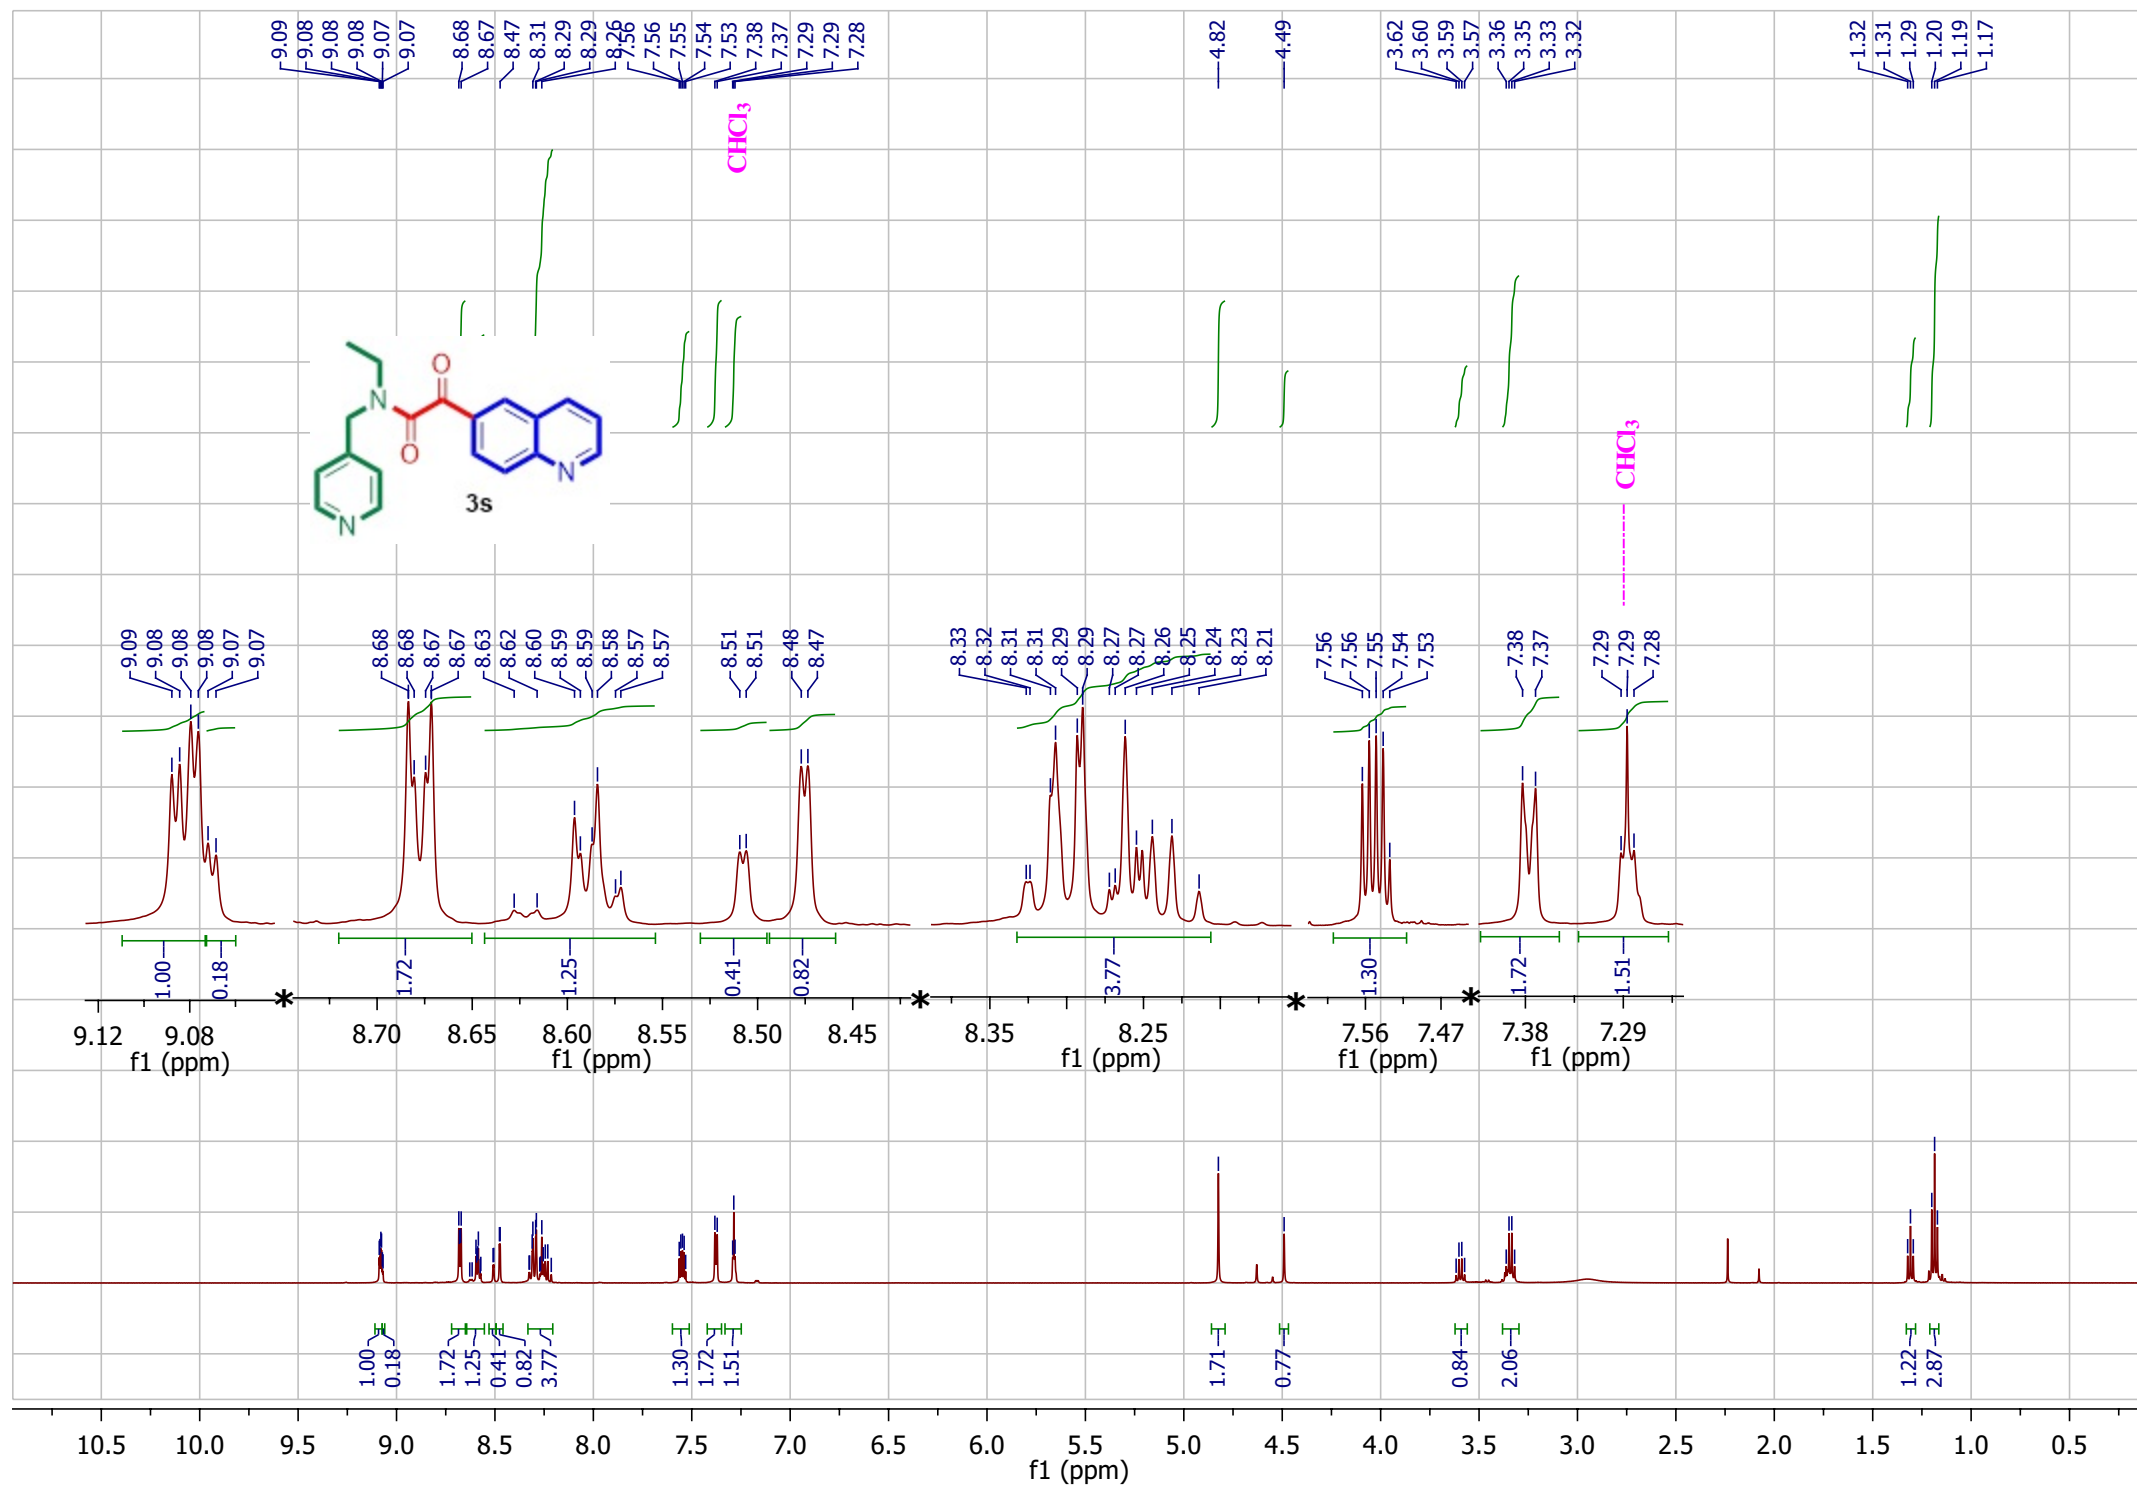

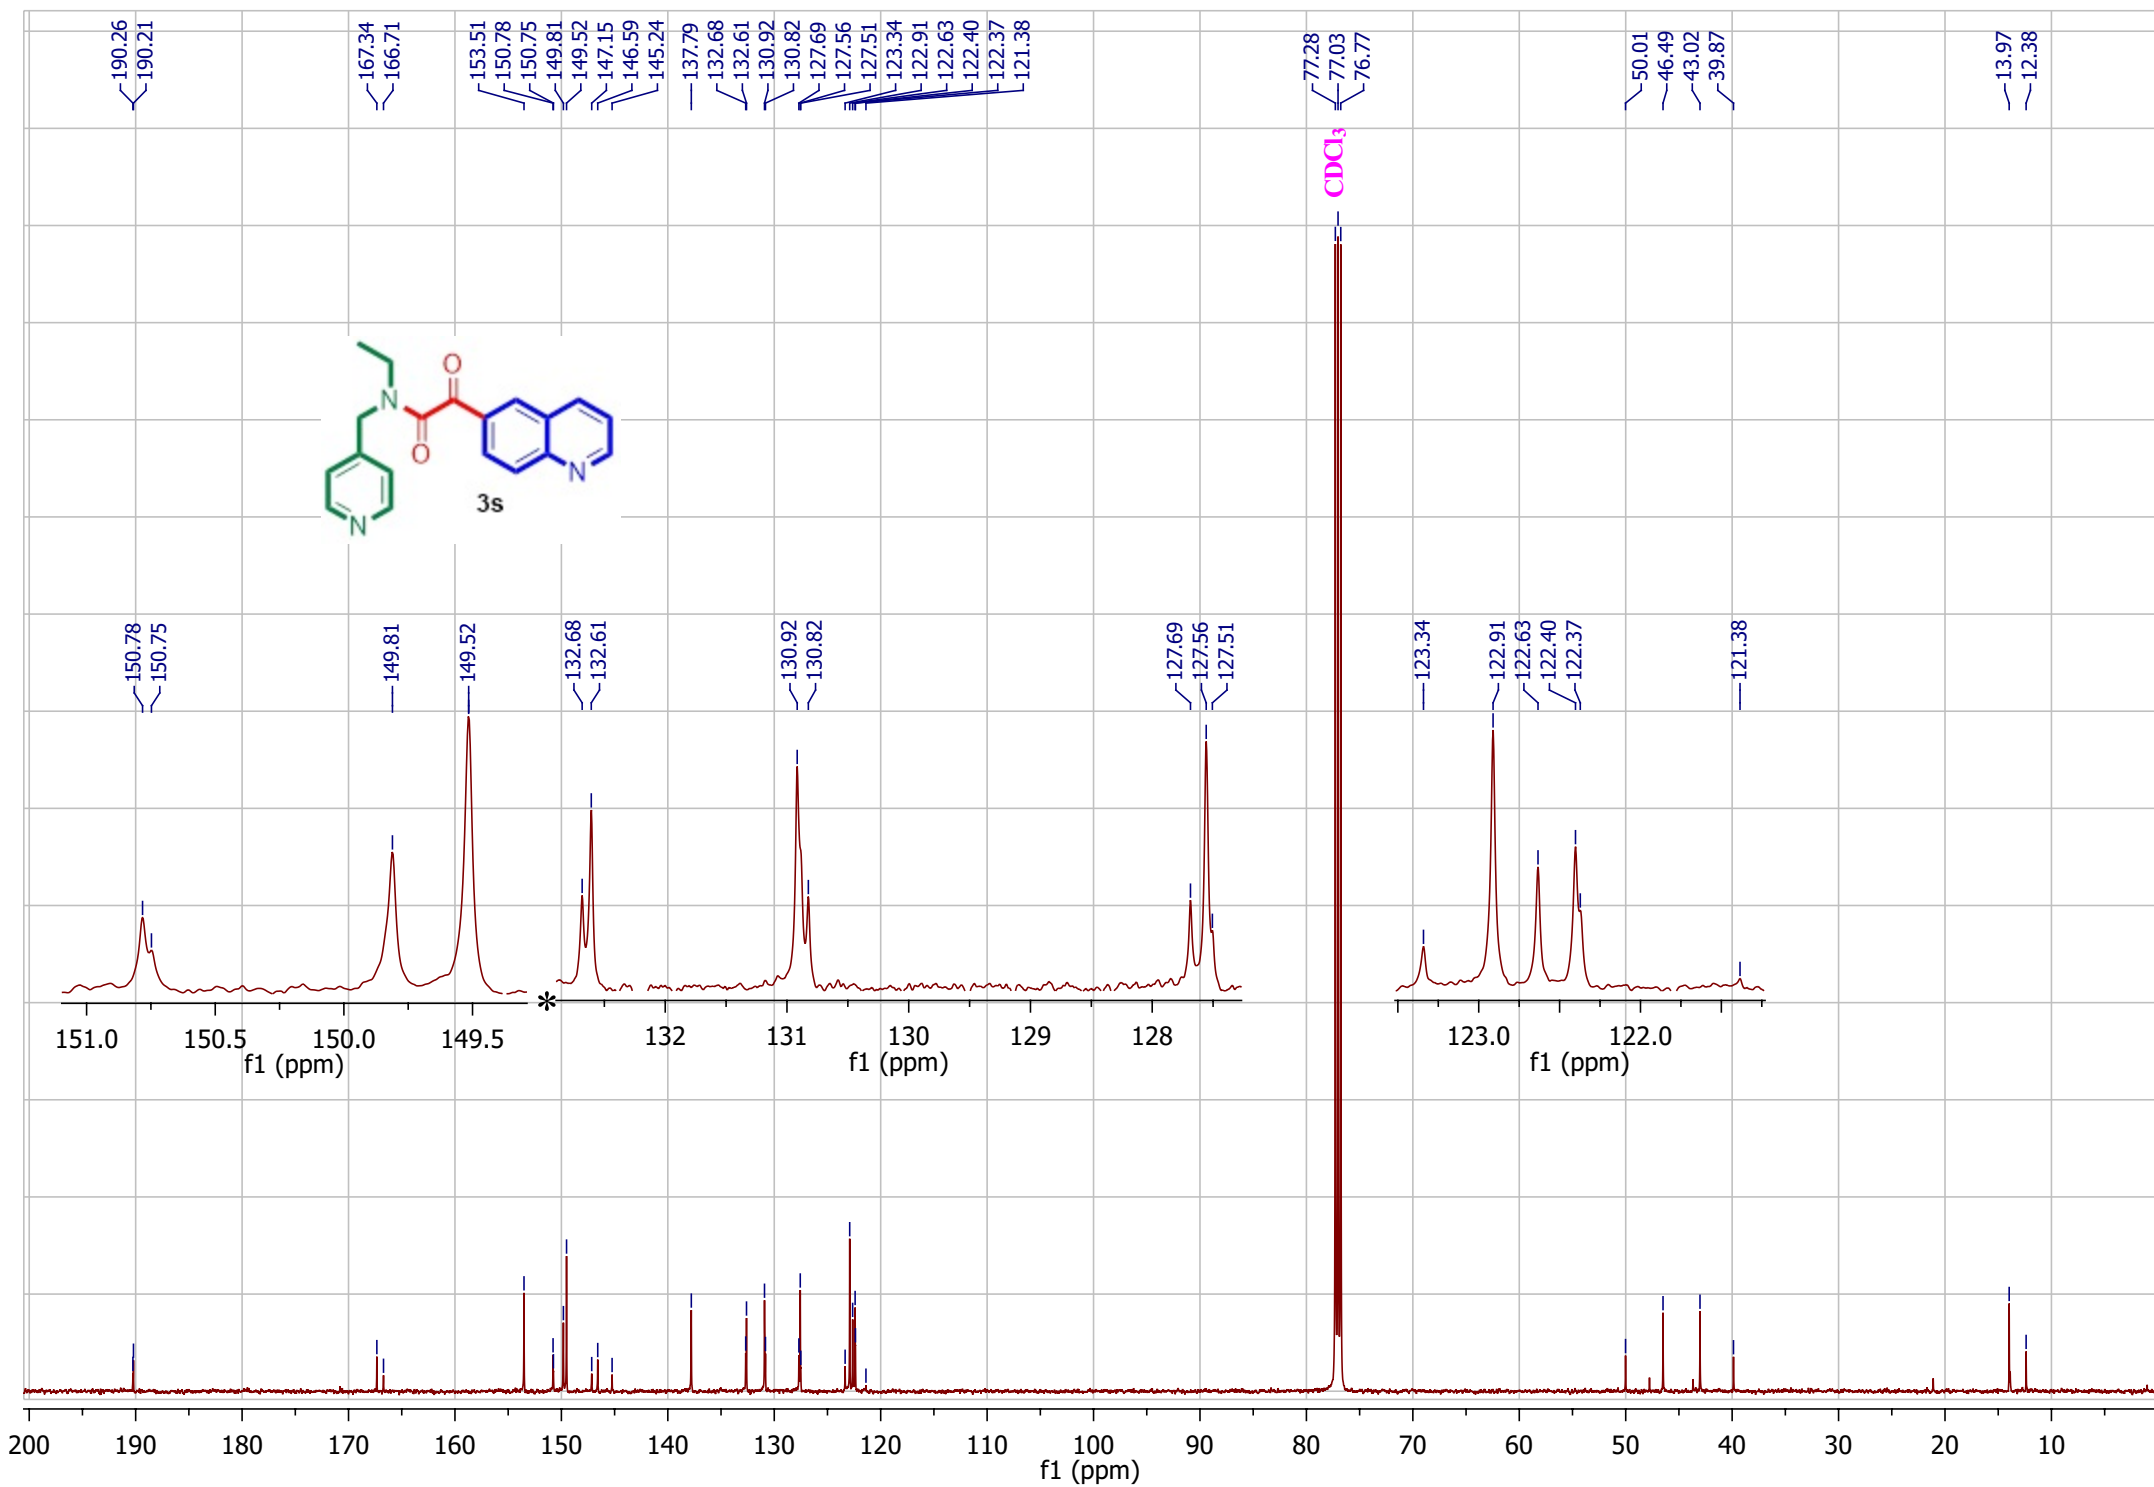

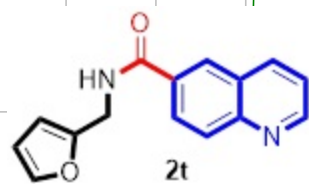

2t

8.97  
8.96  
8.96  
8.95  
8.35  
8.34  
8.16  
8.14  
8.10  
8.09  
7.49  
7.48  
7.47  
7.46  
7.39  
7.39  
7.29  
7.29  
6.36  
6.35  
6.34  
6.34  
4.72  
4.71

CHCl<sub>3</sub>

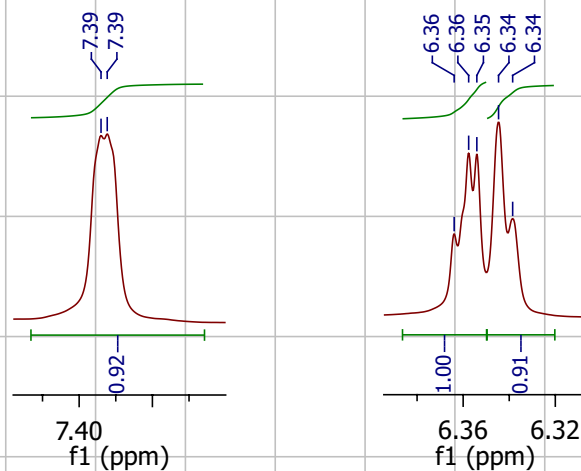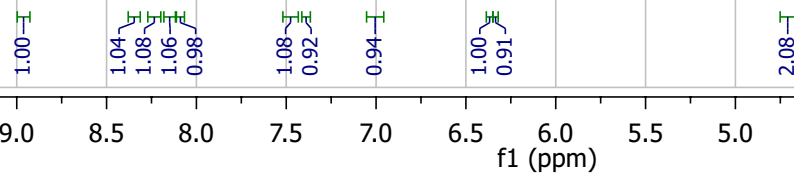

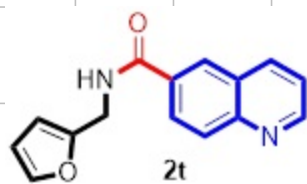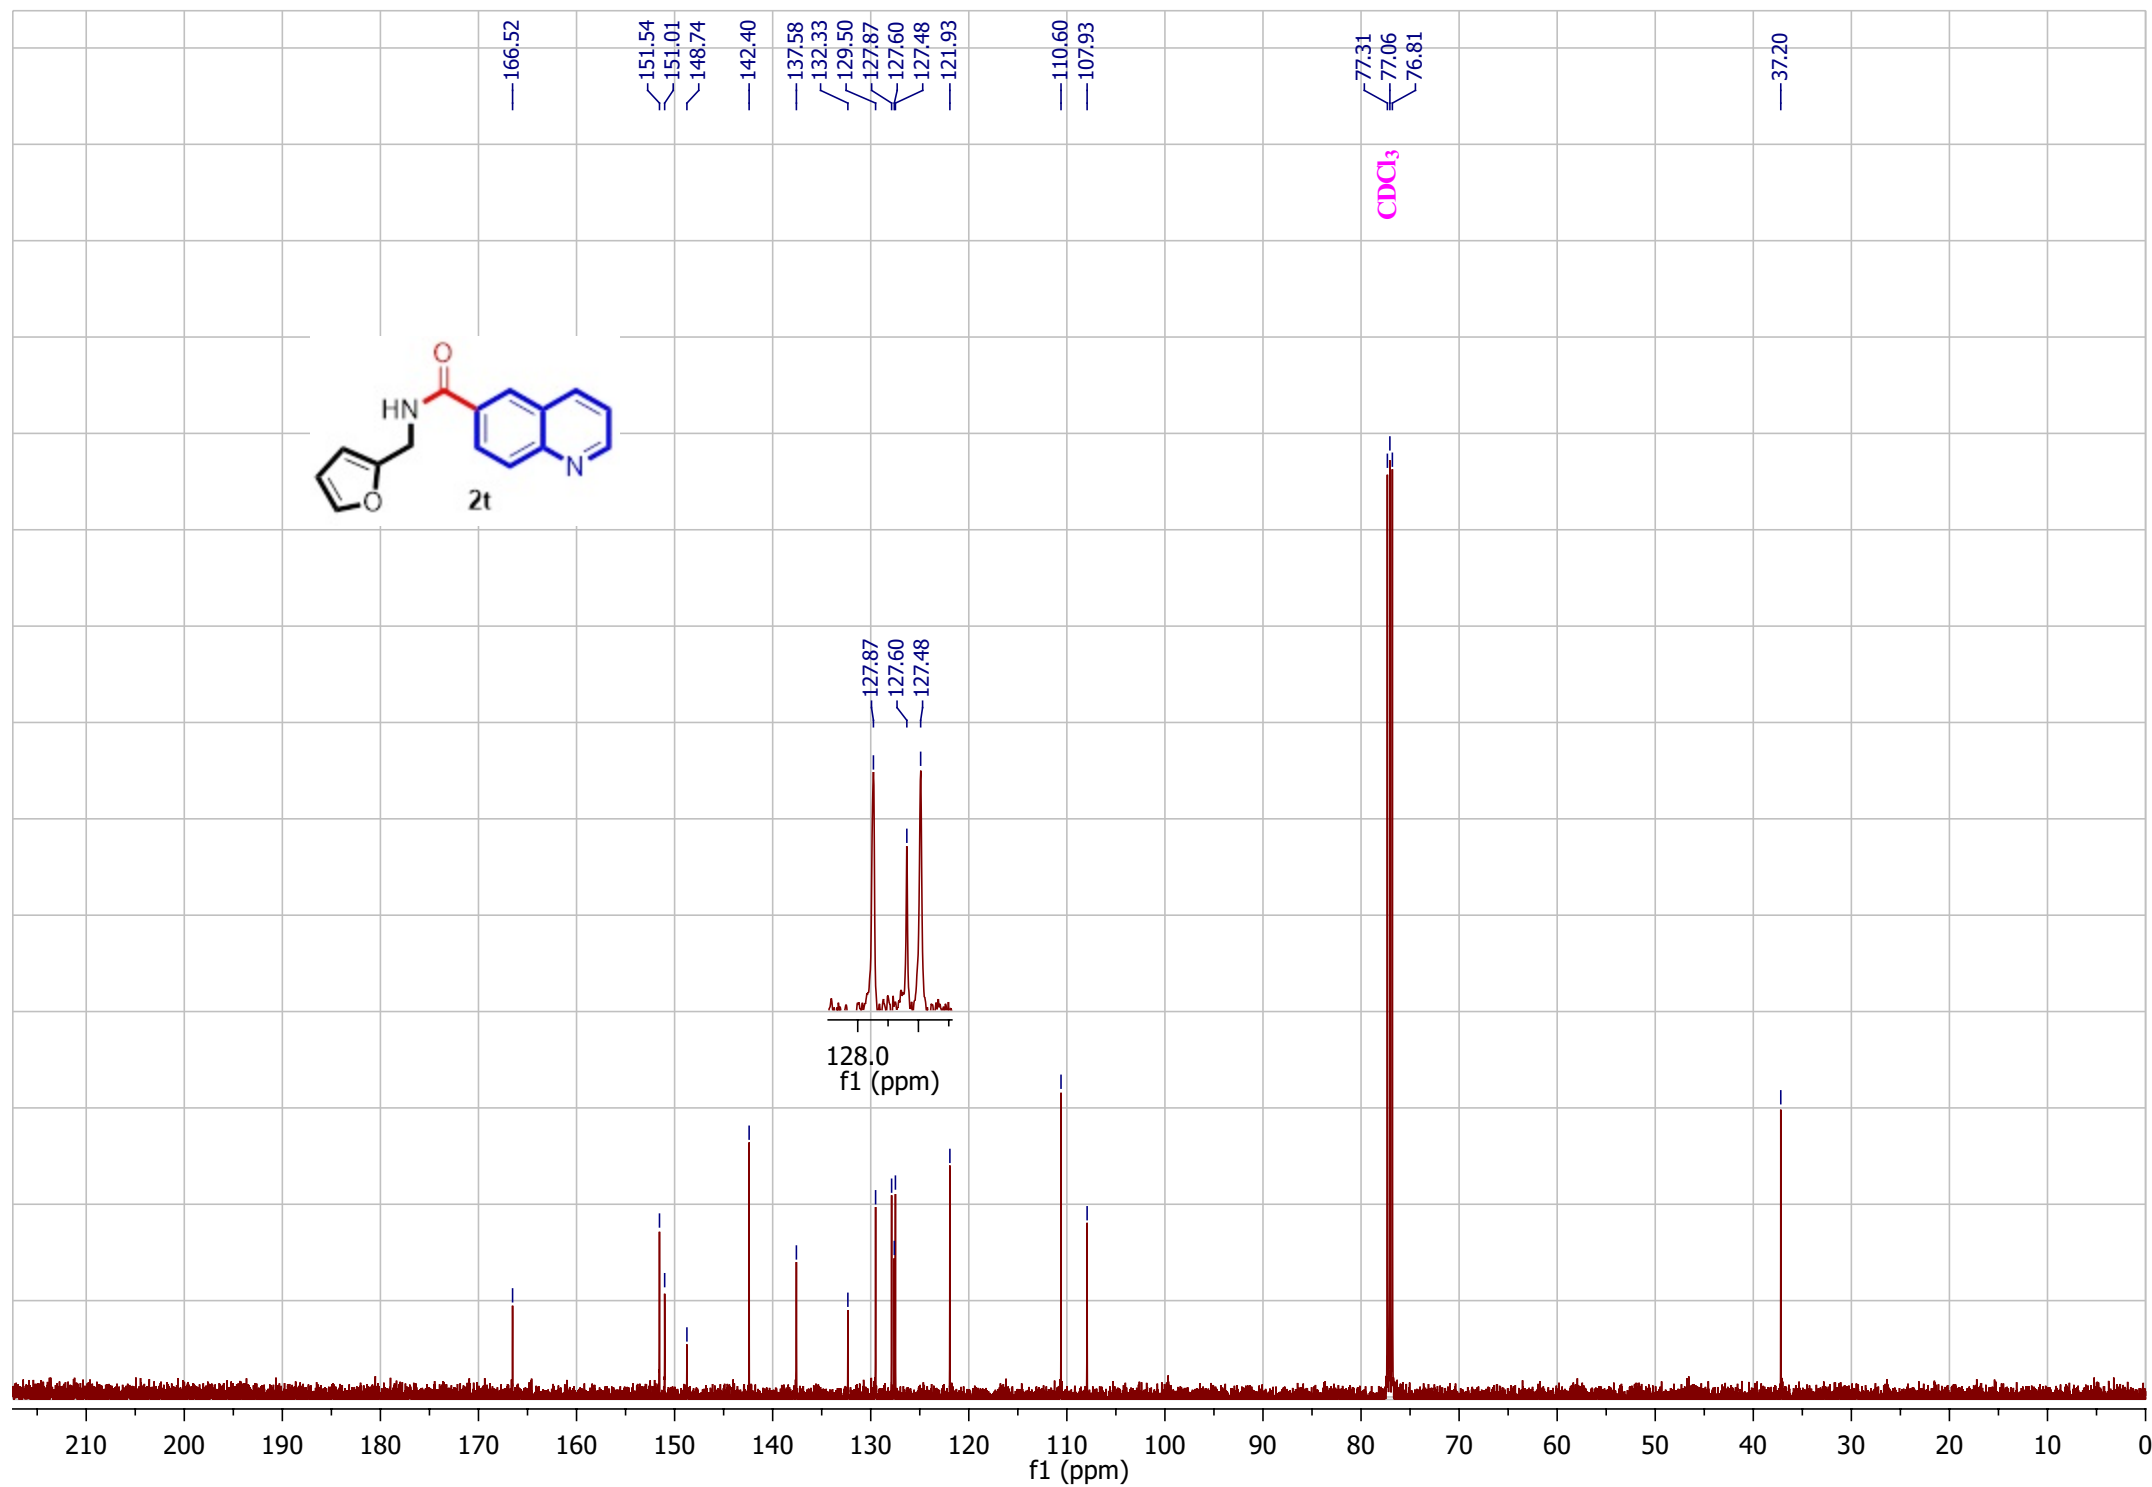

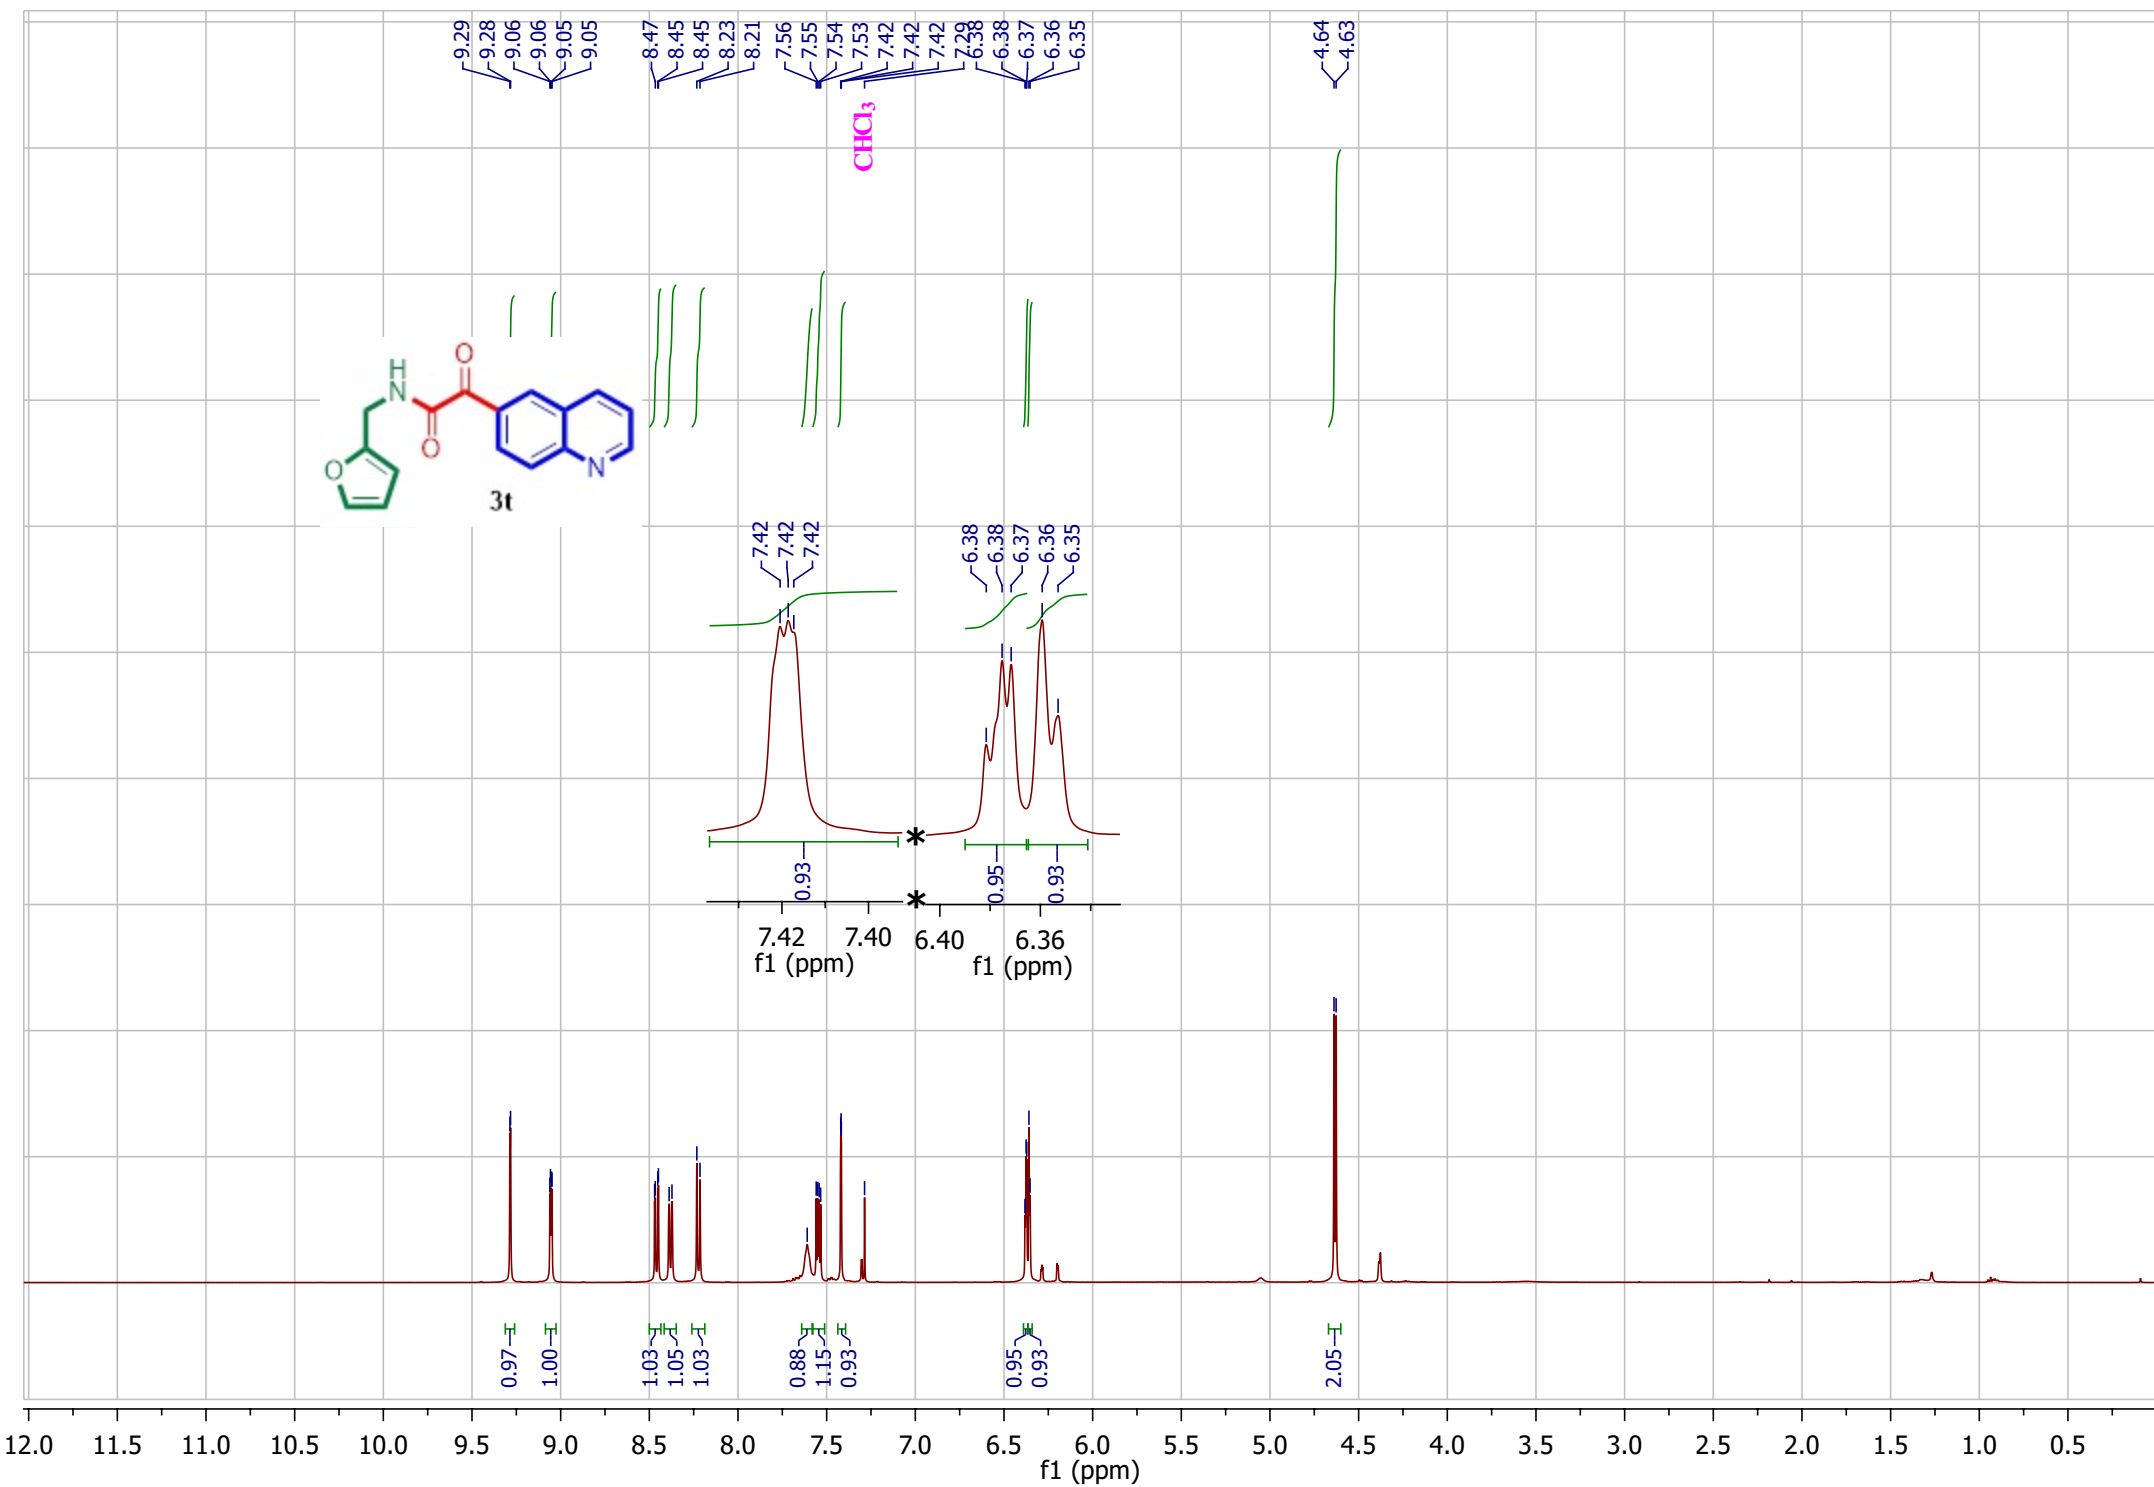



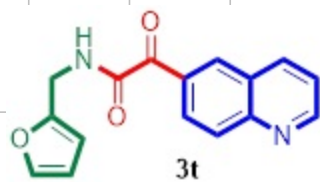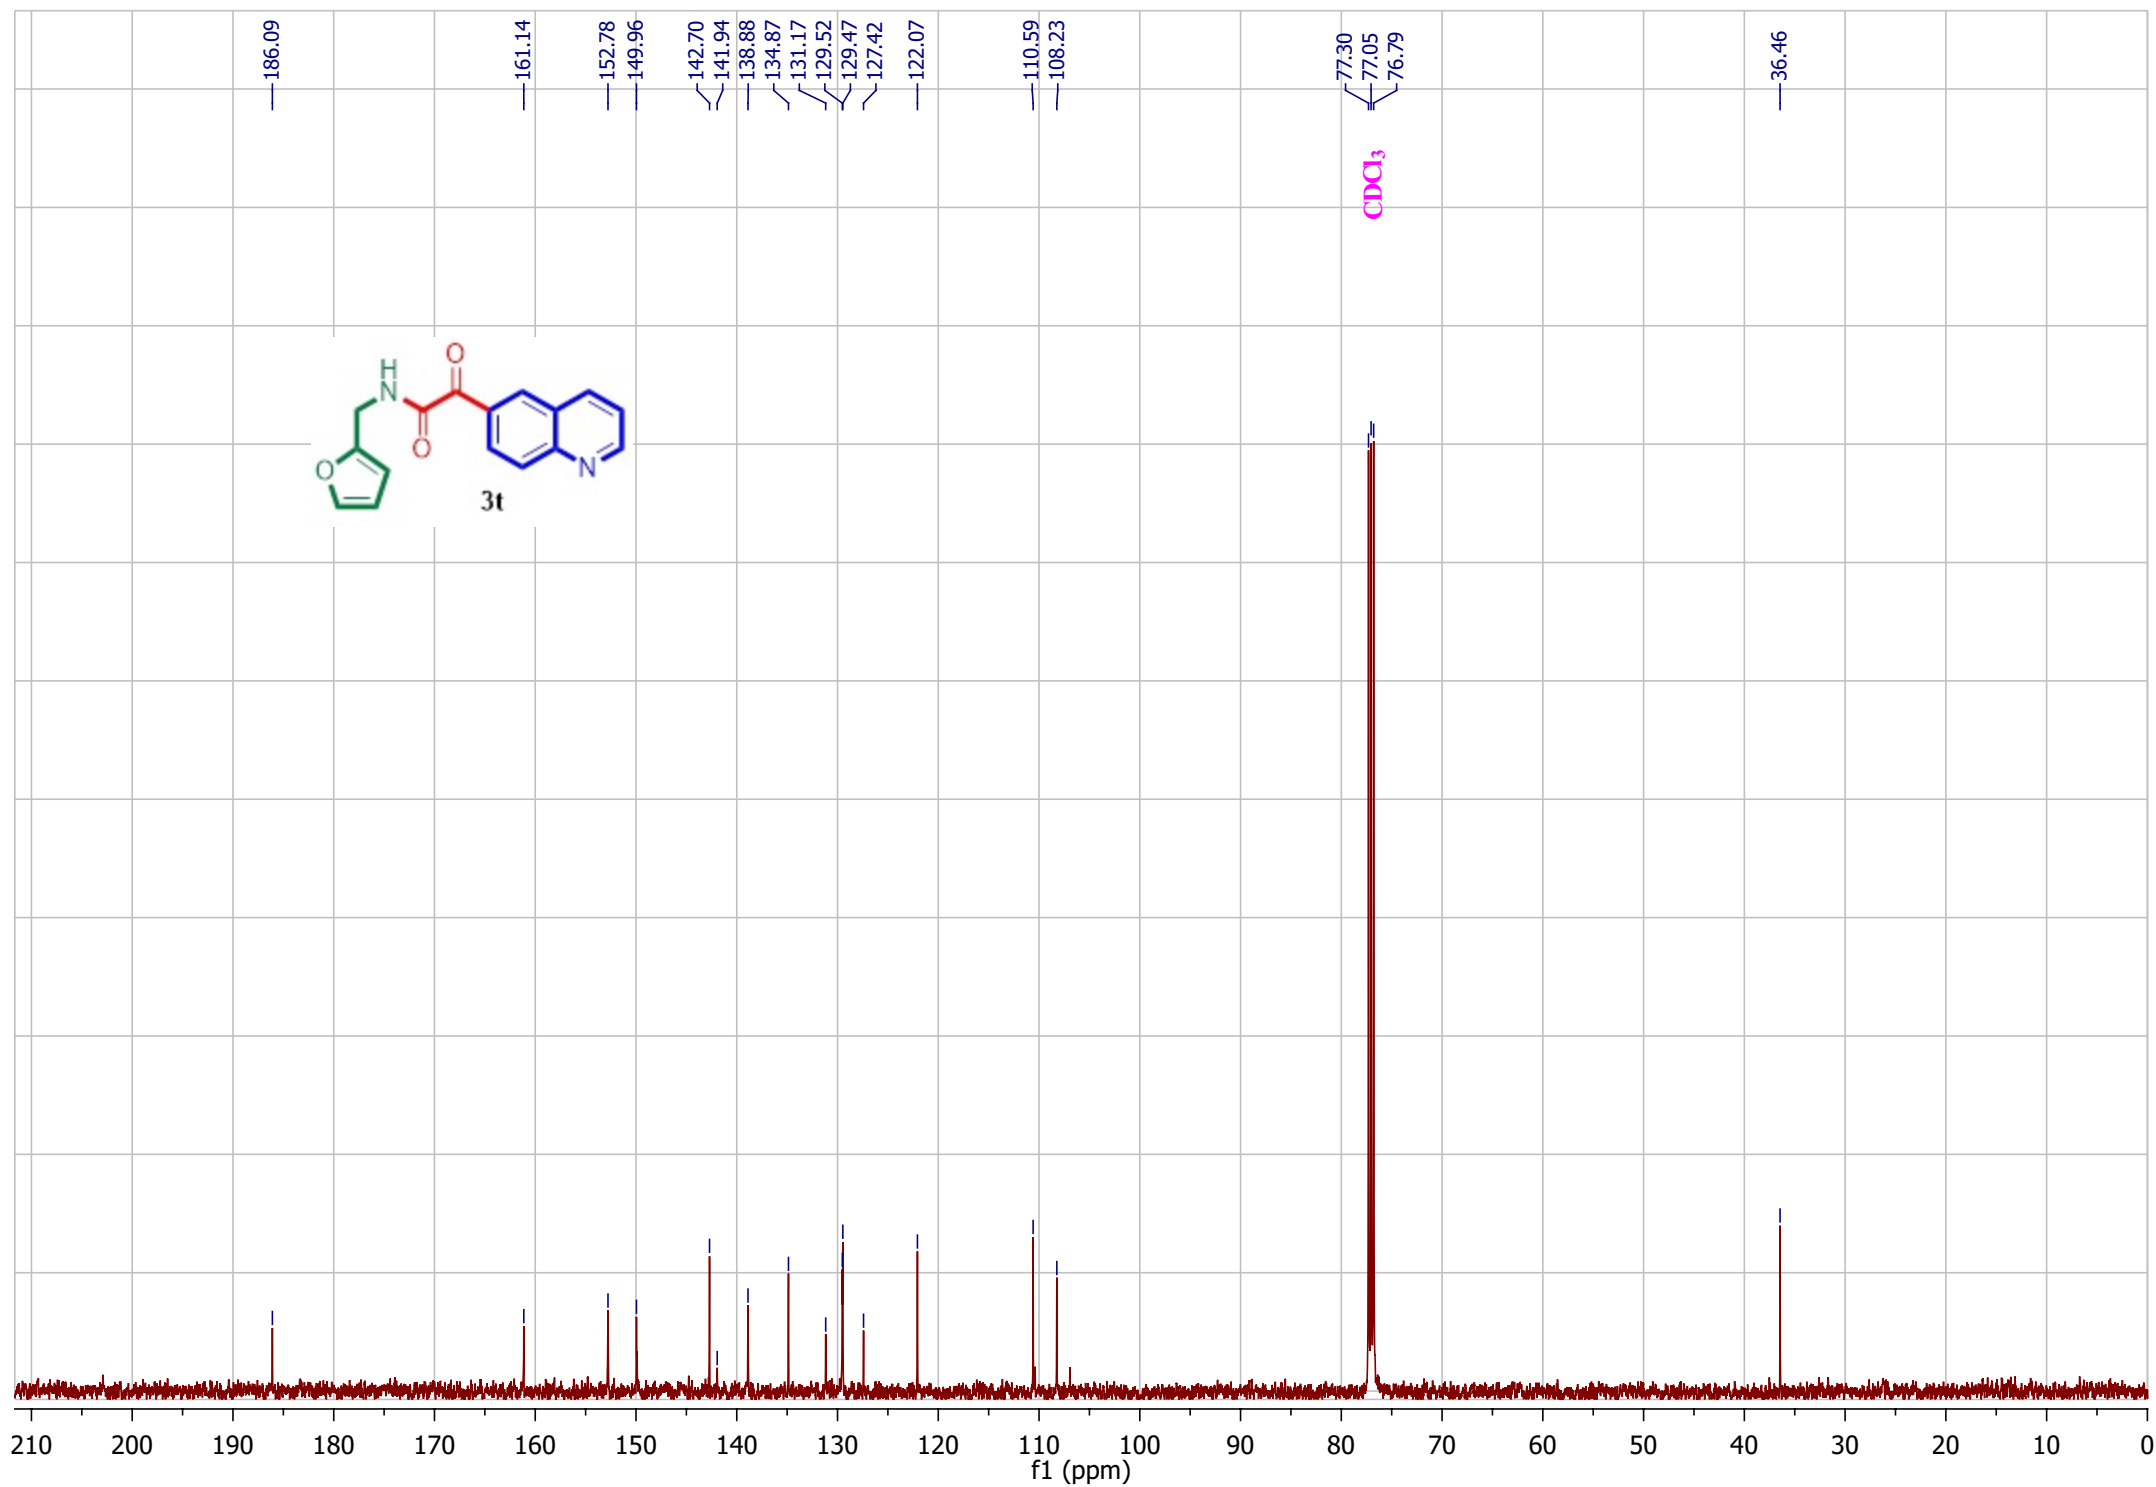

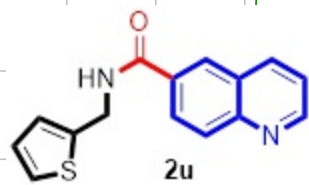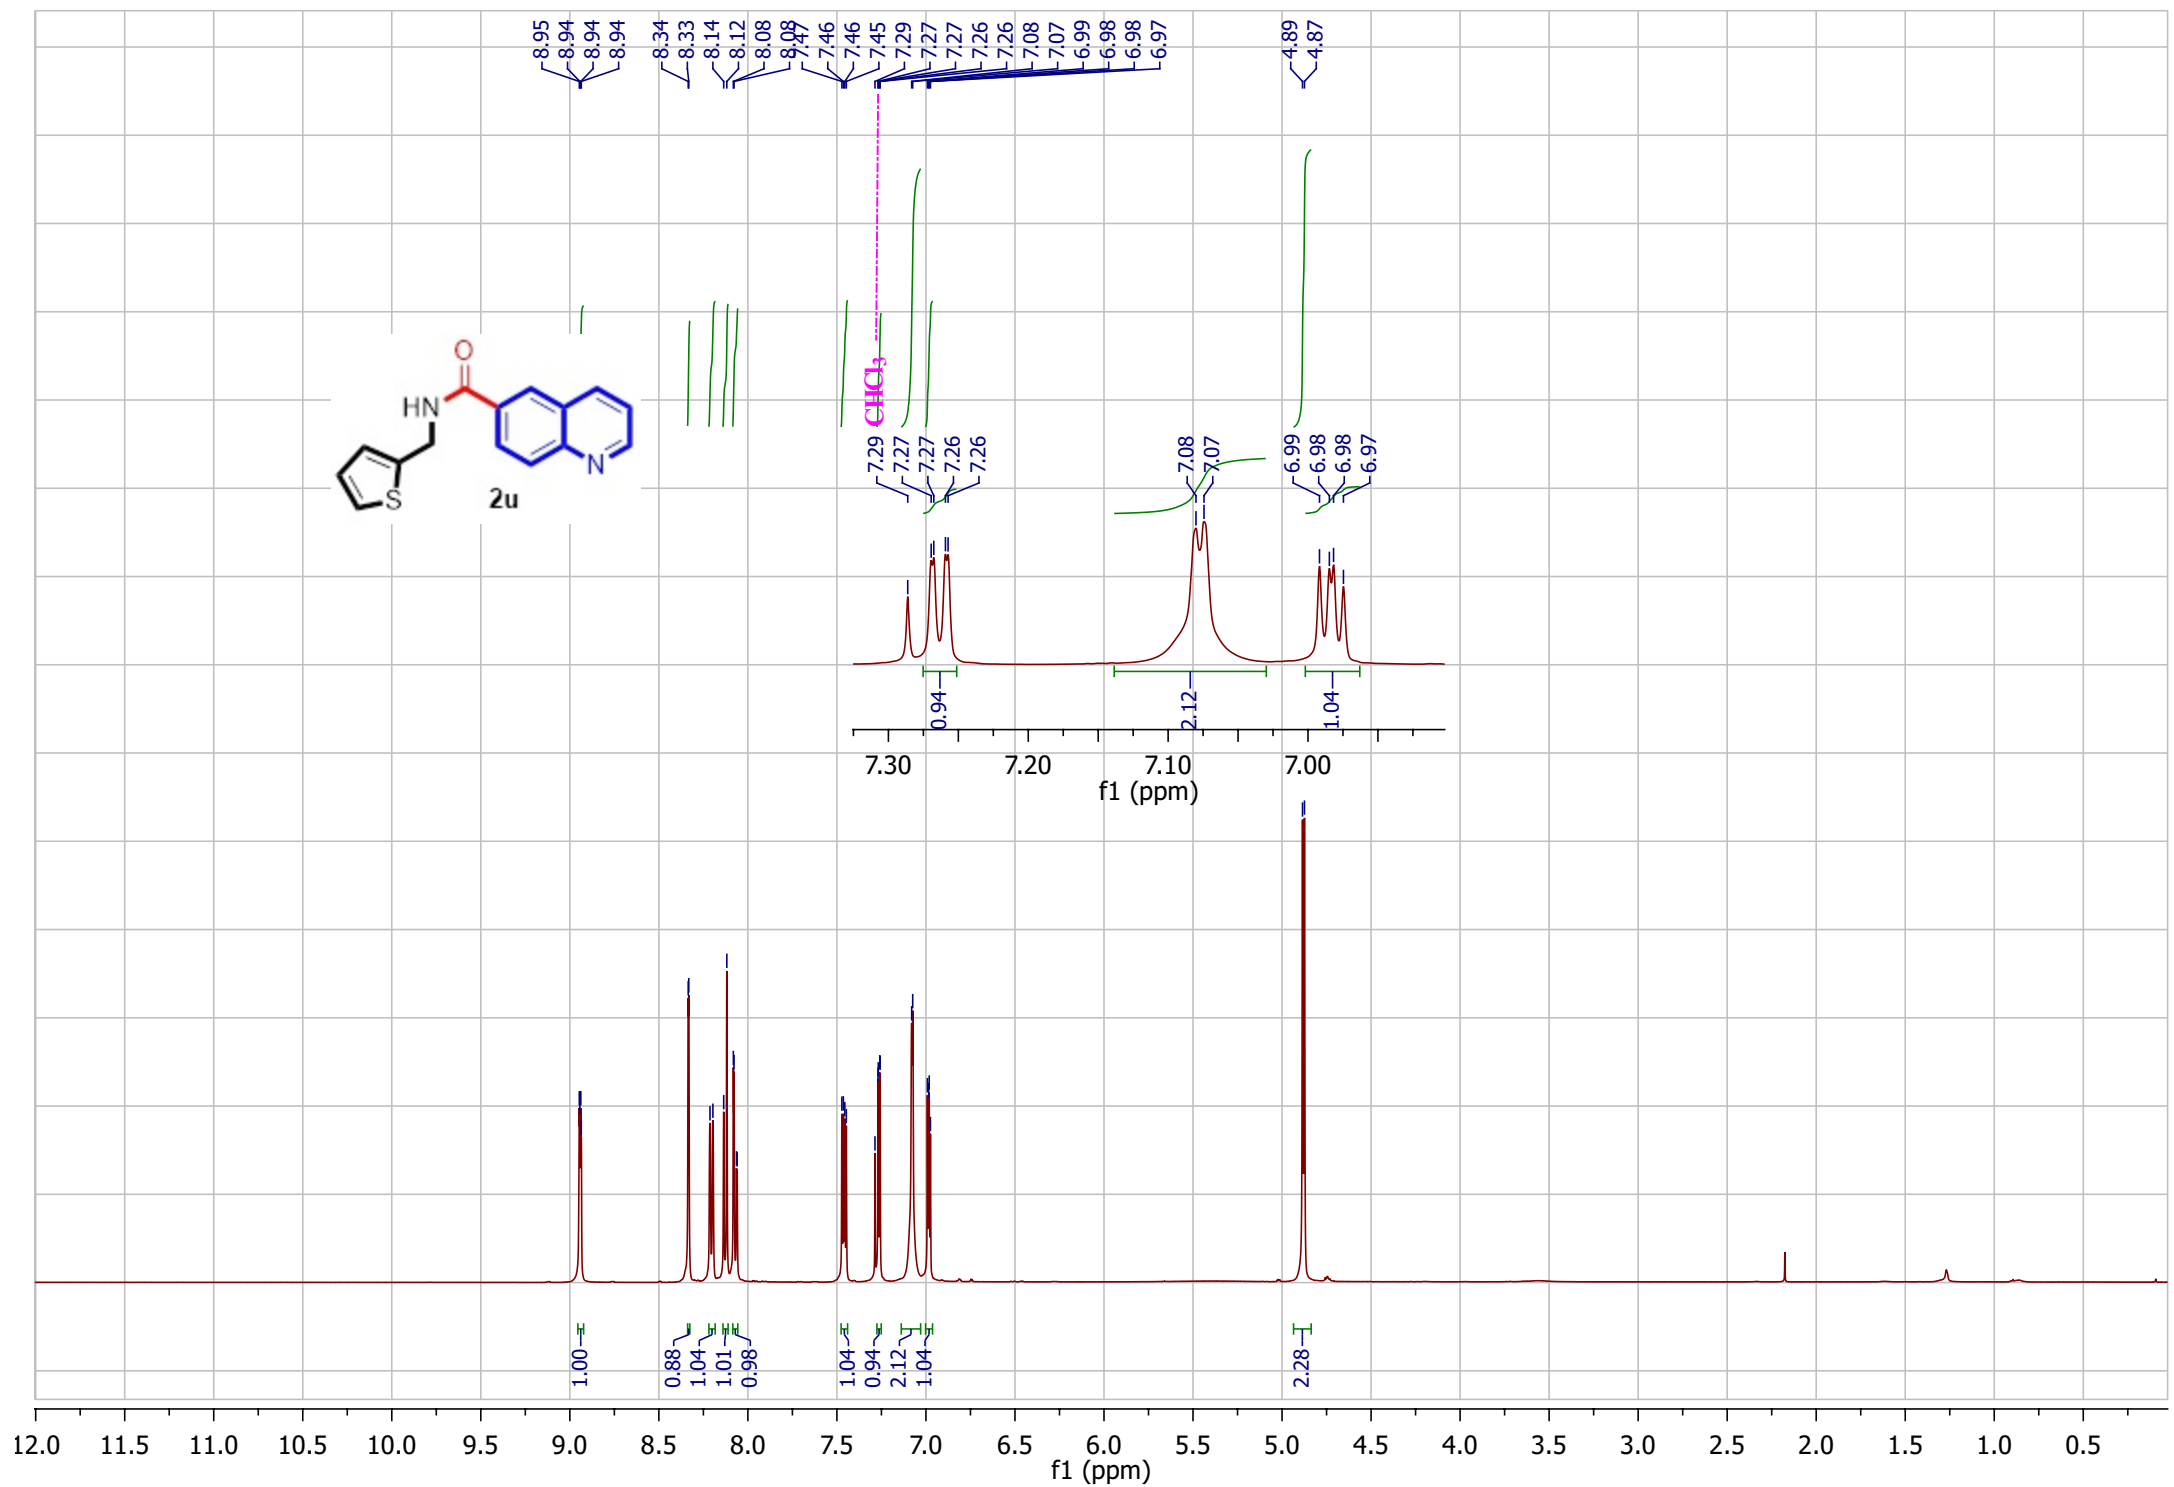

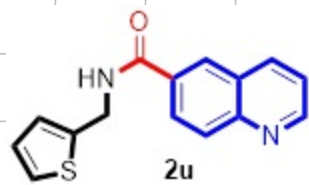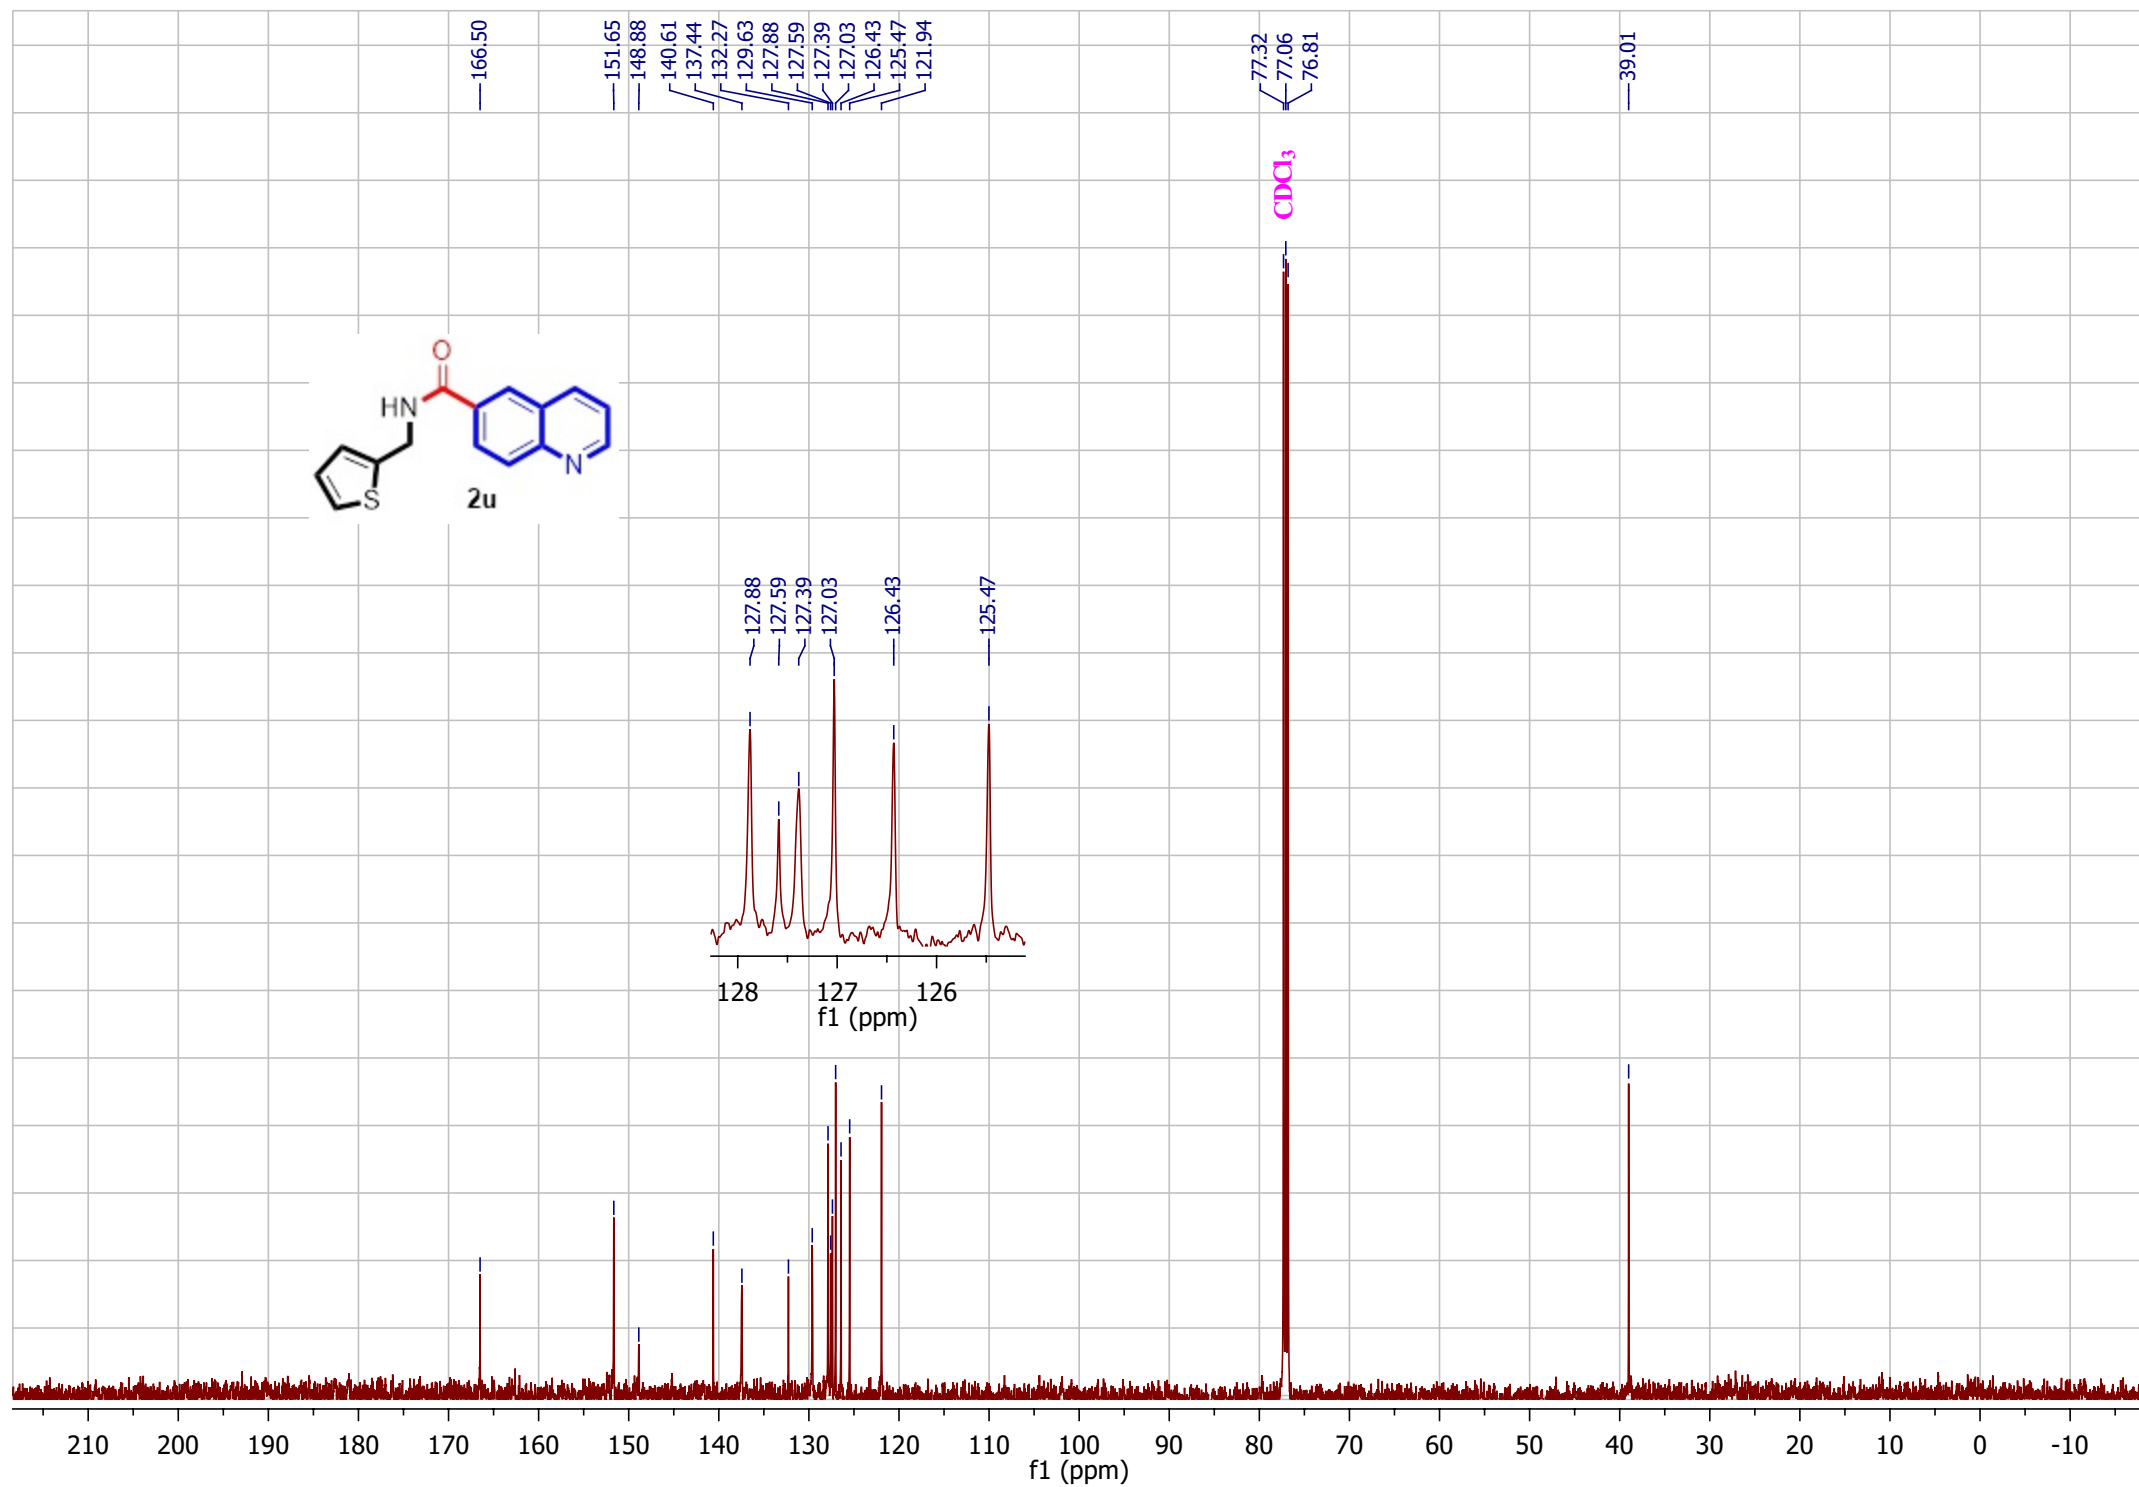

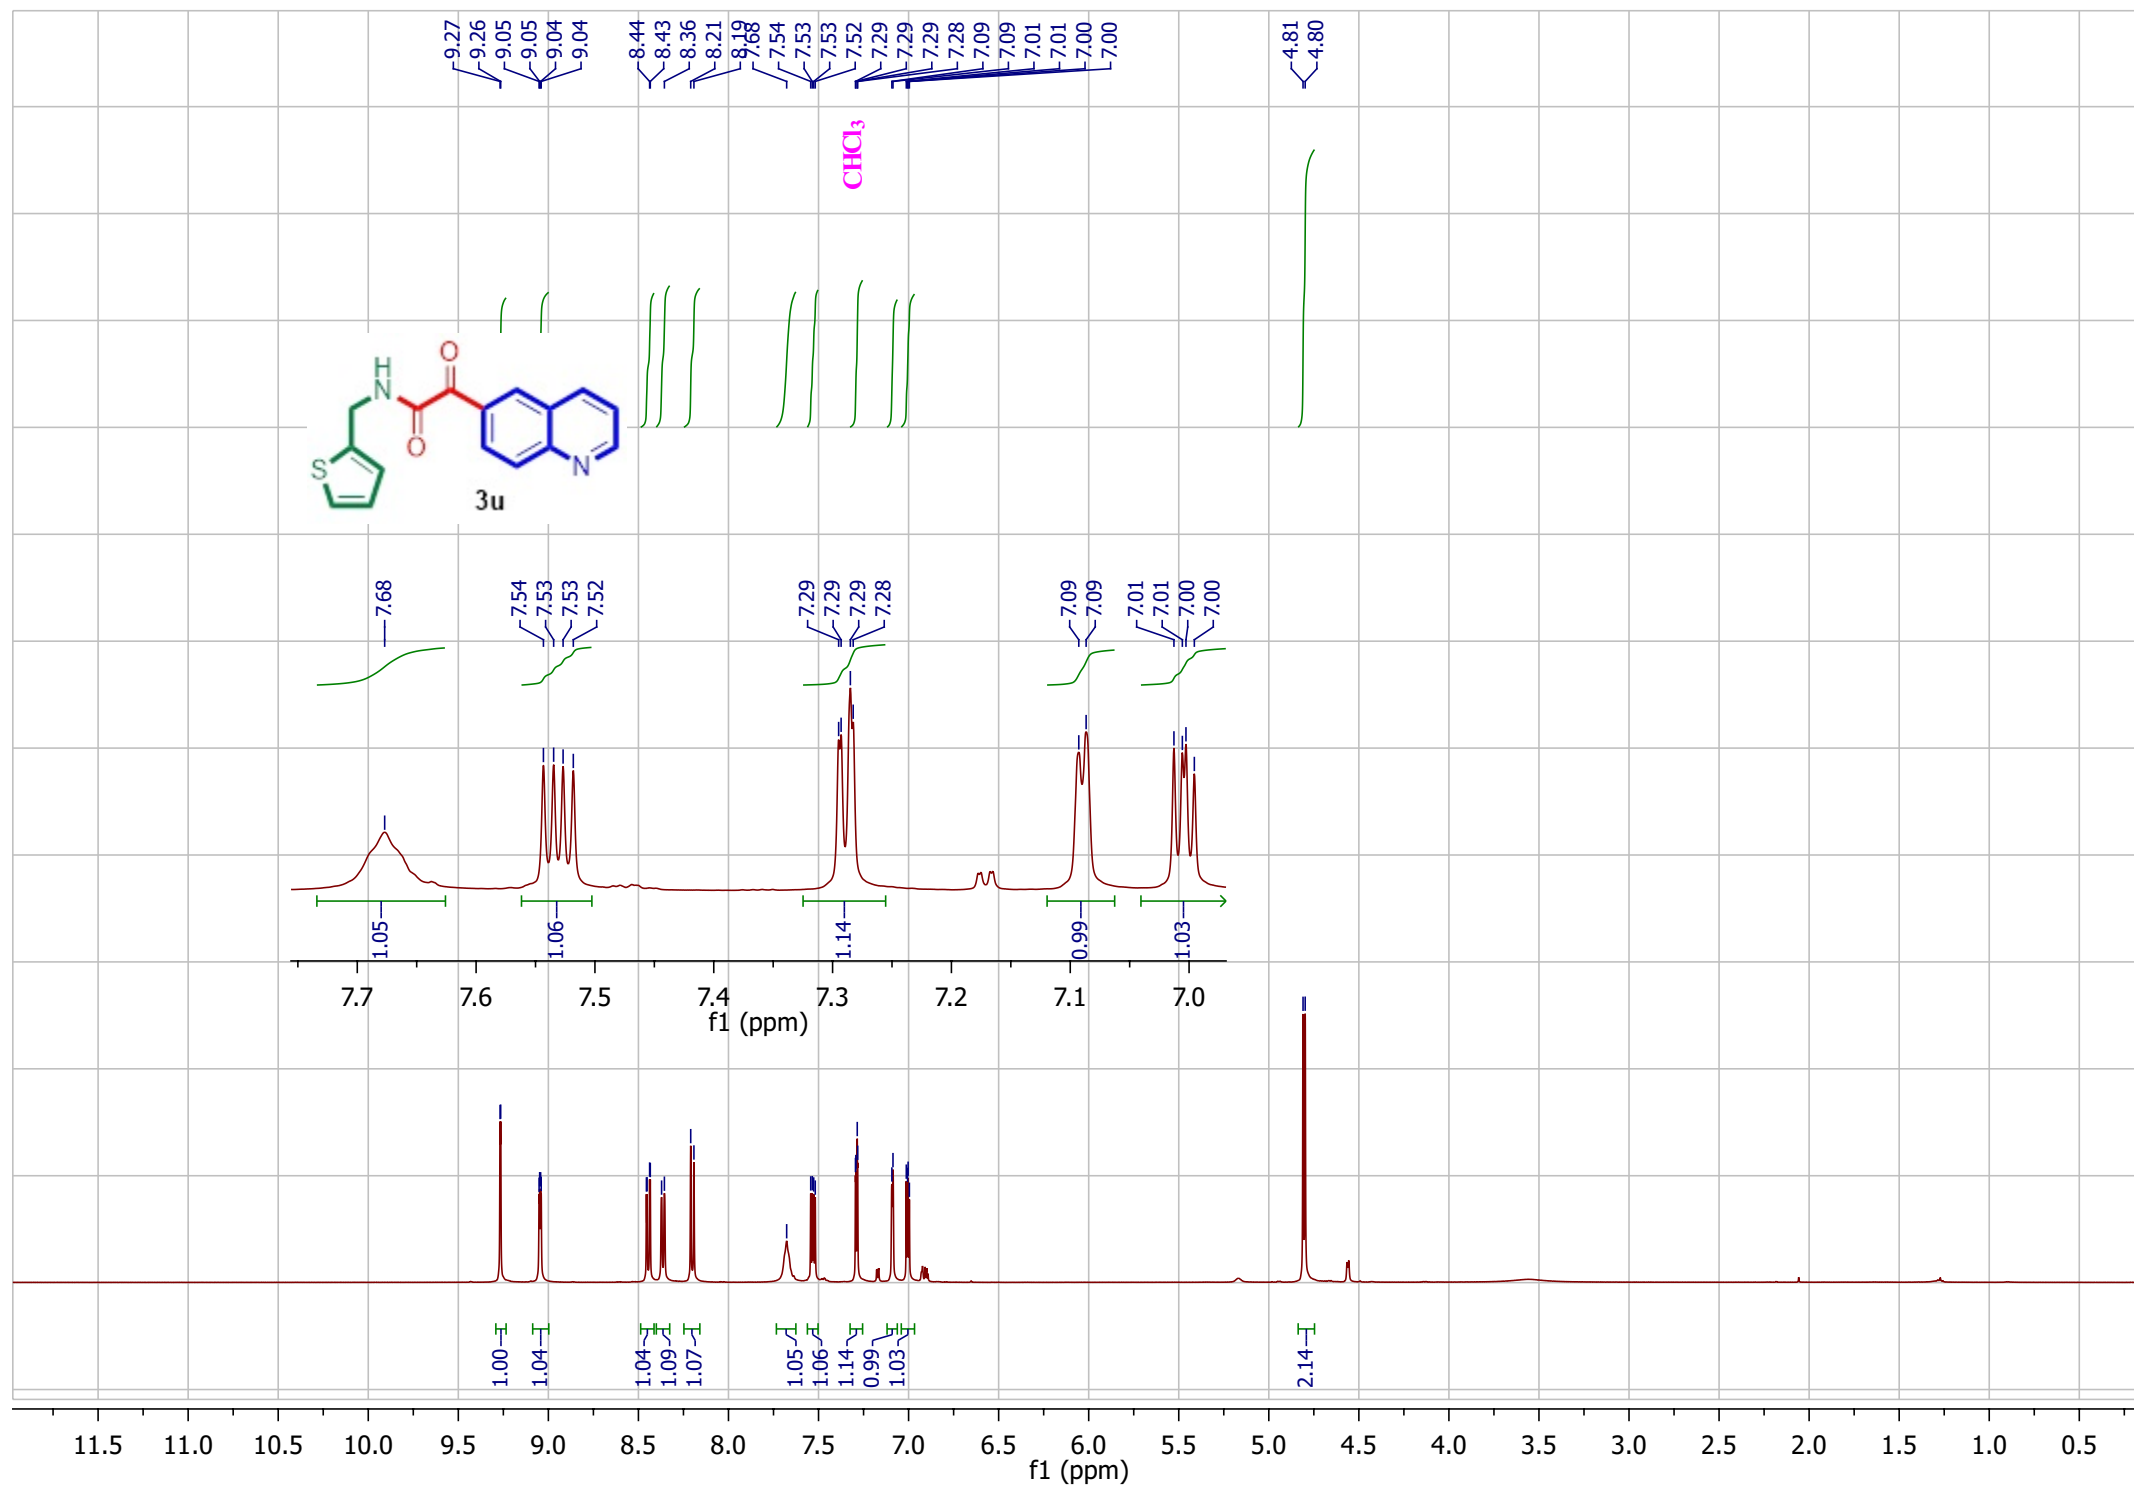

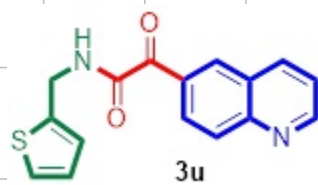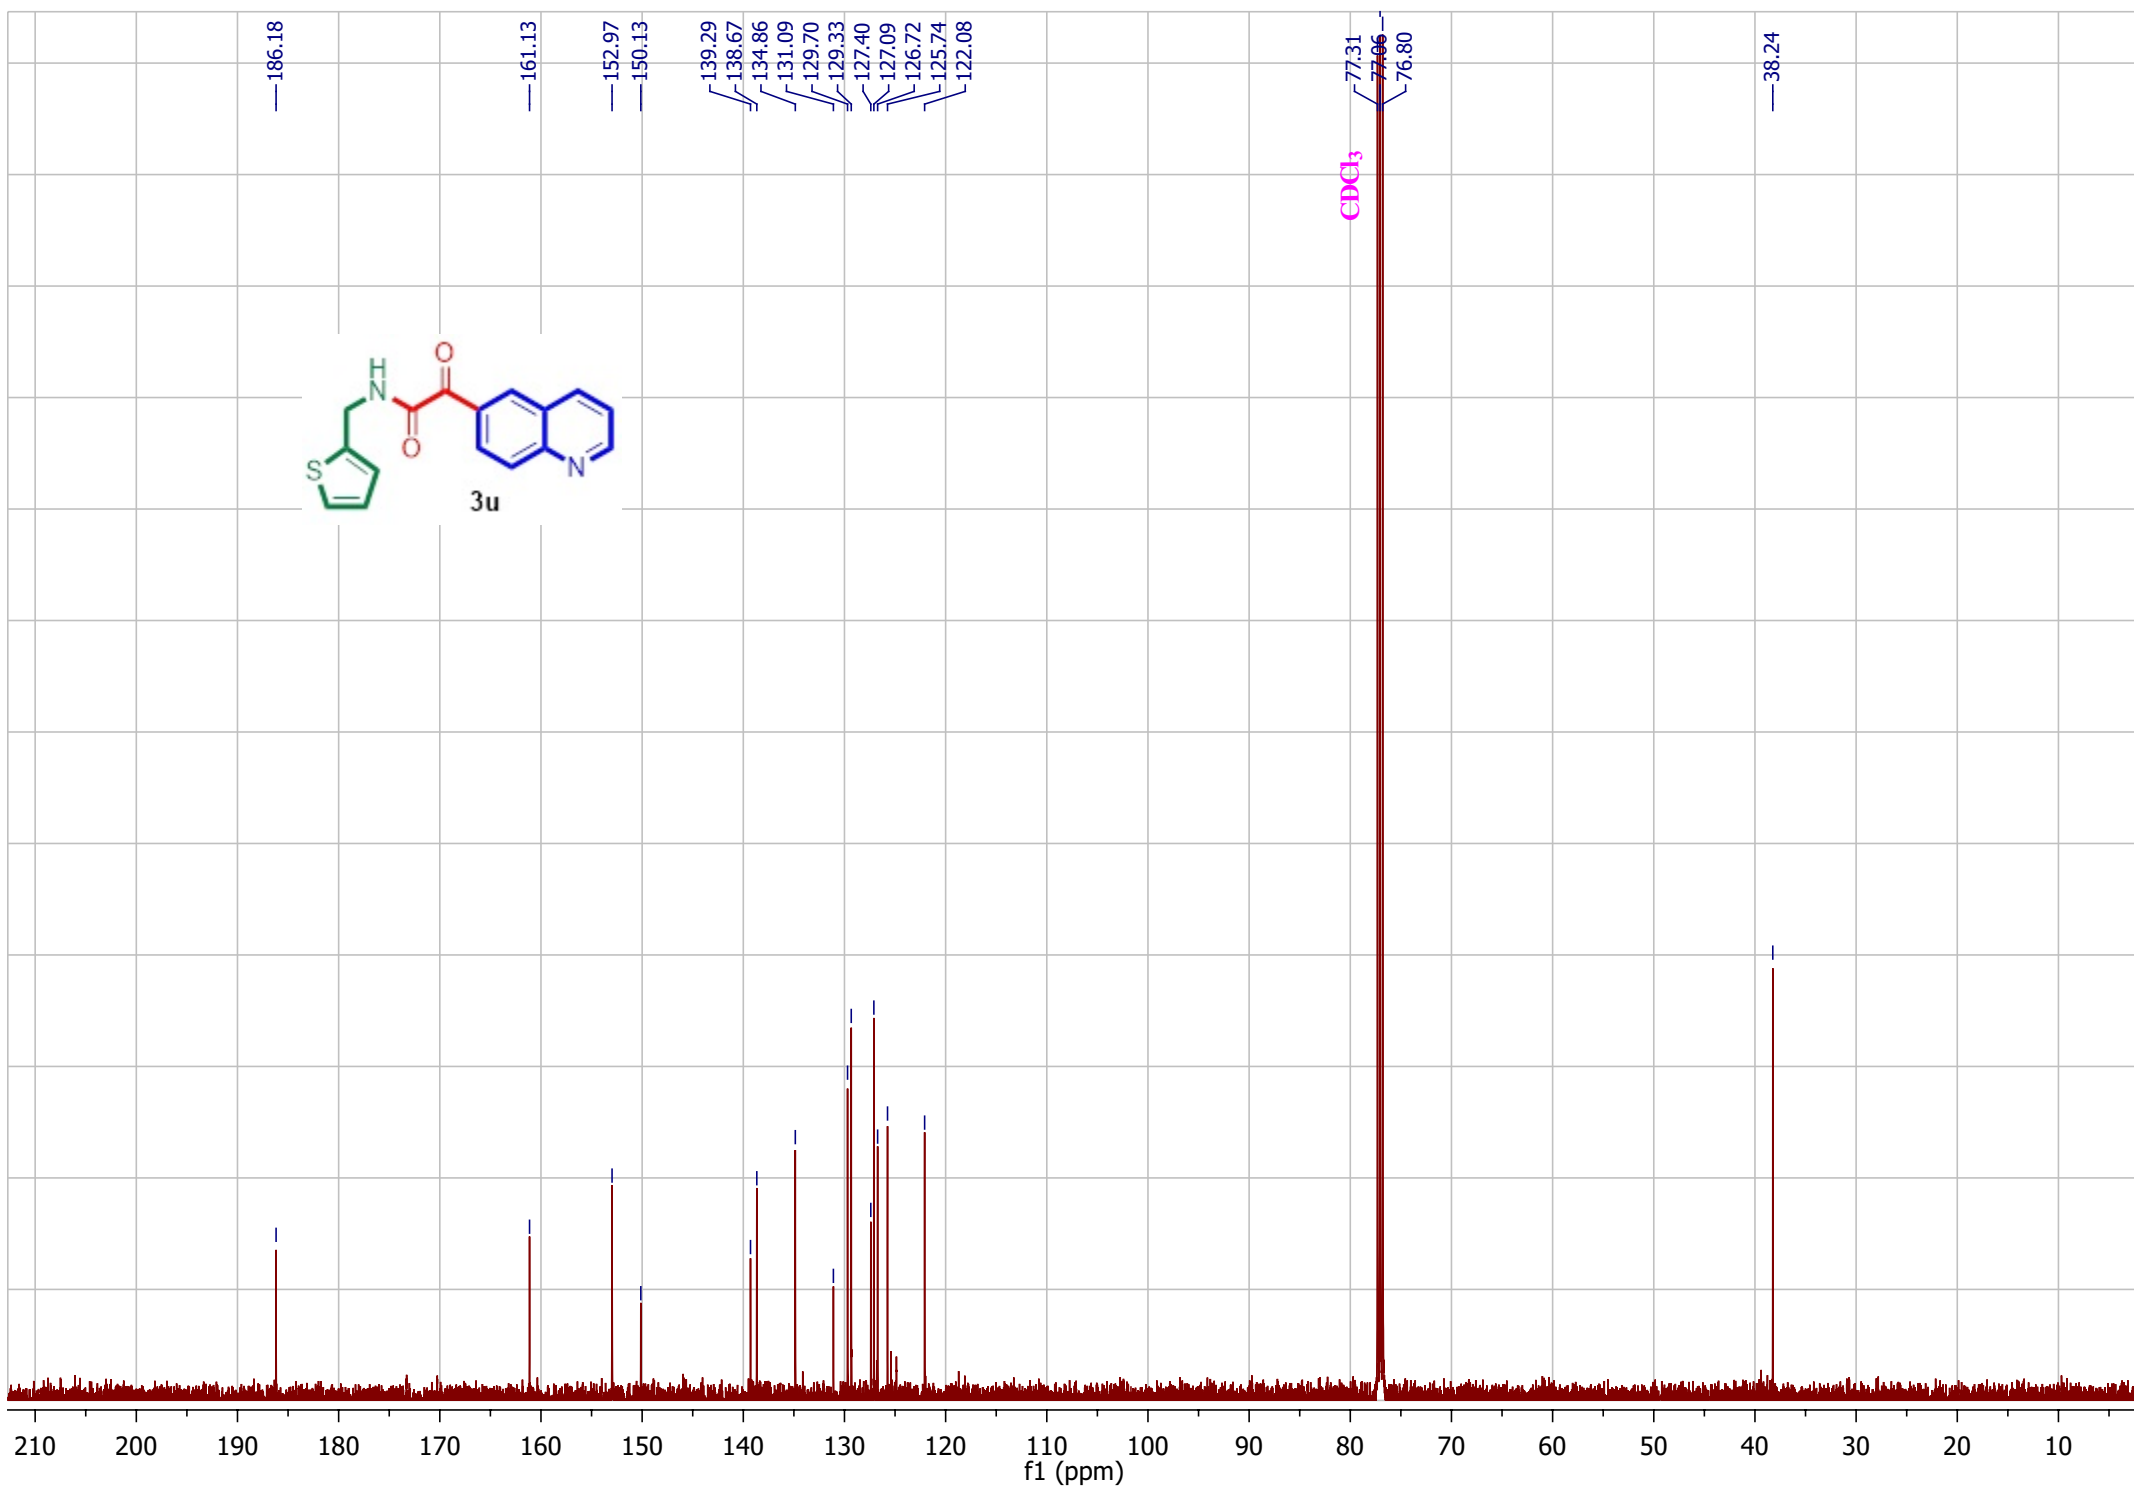

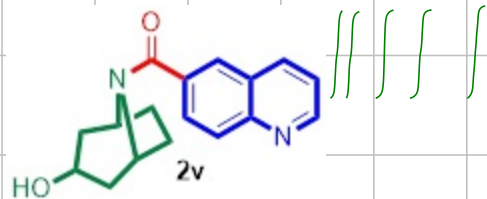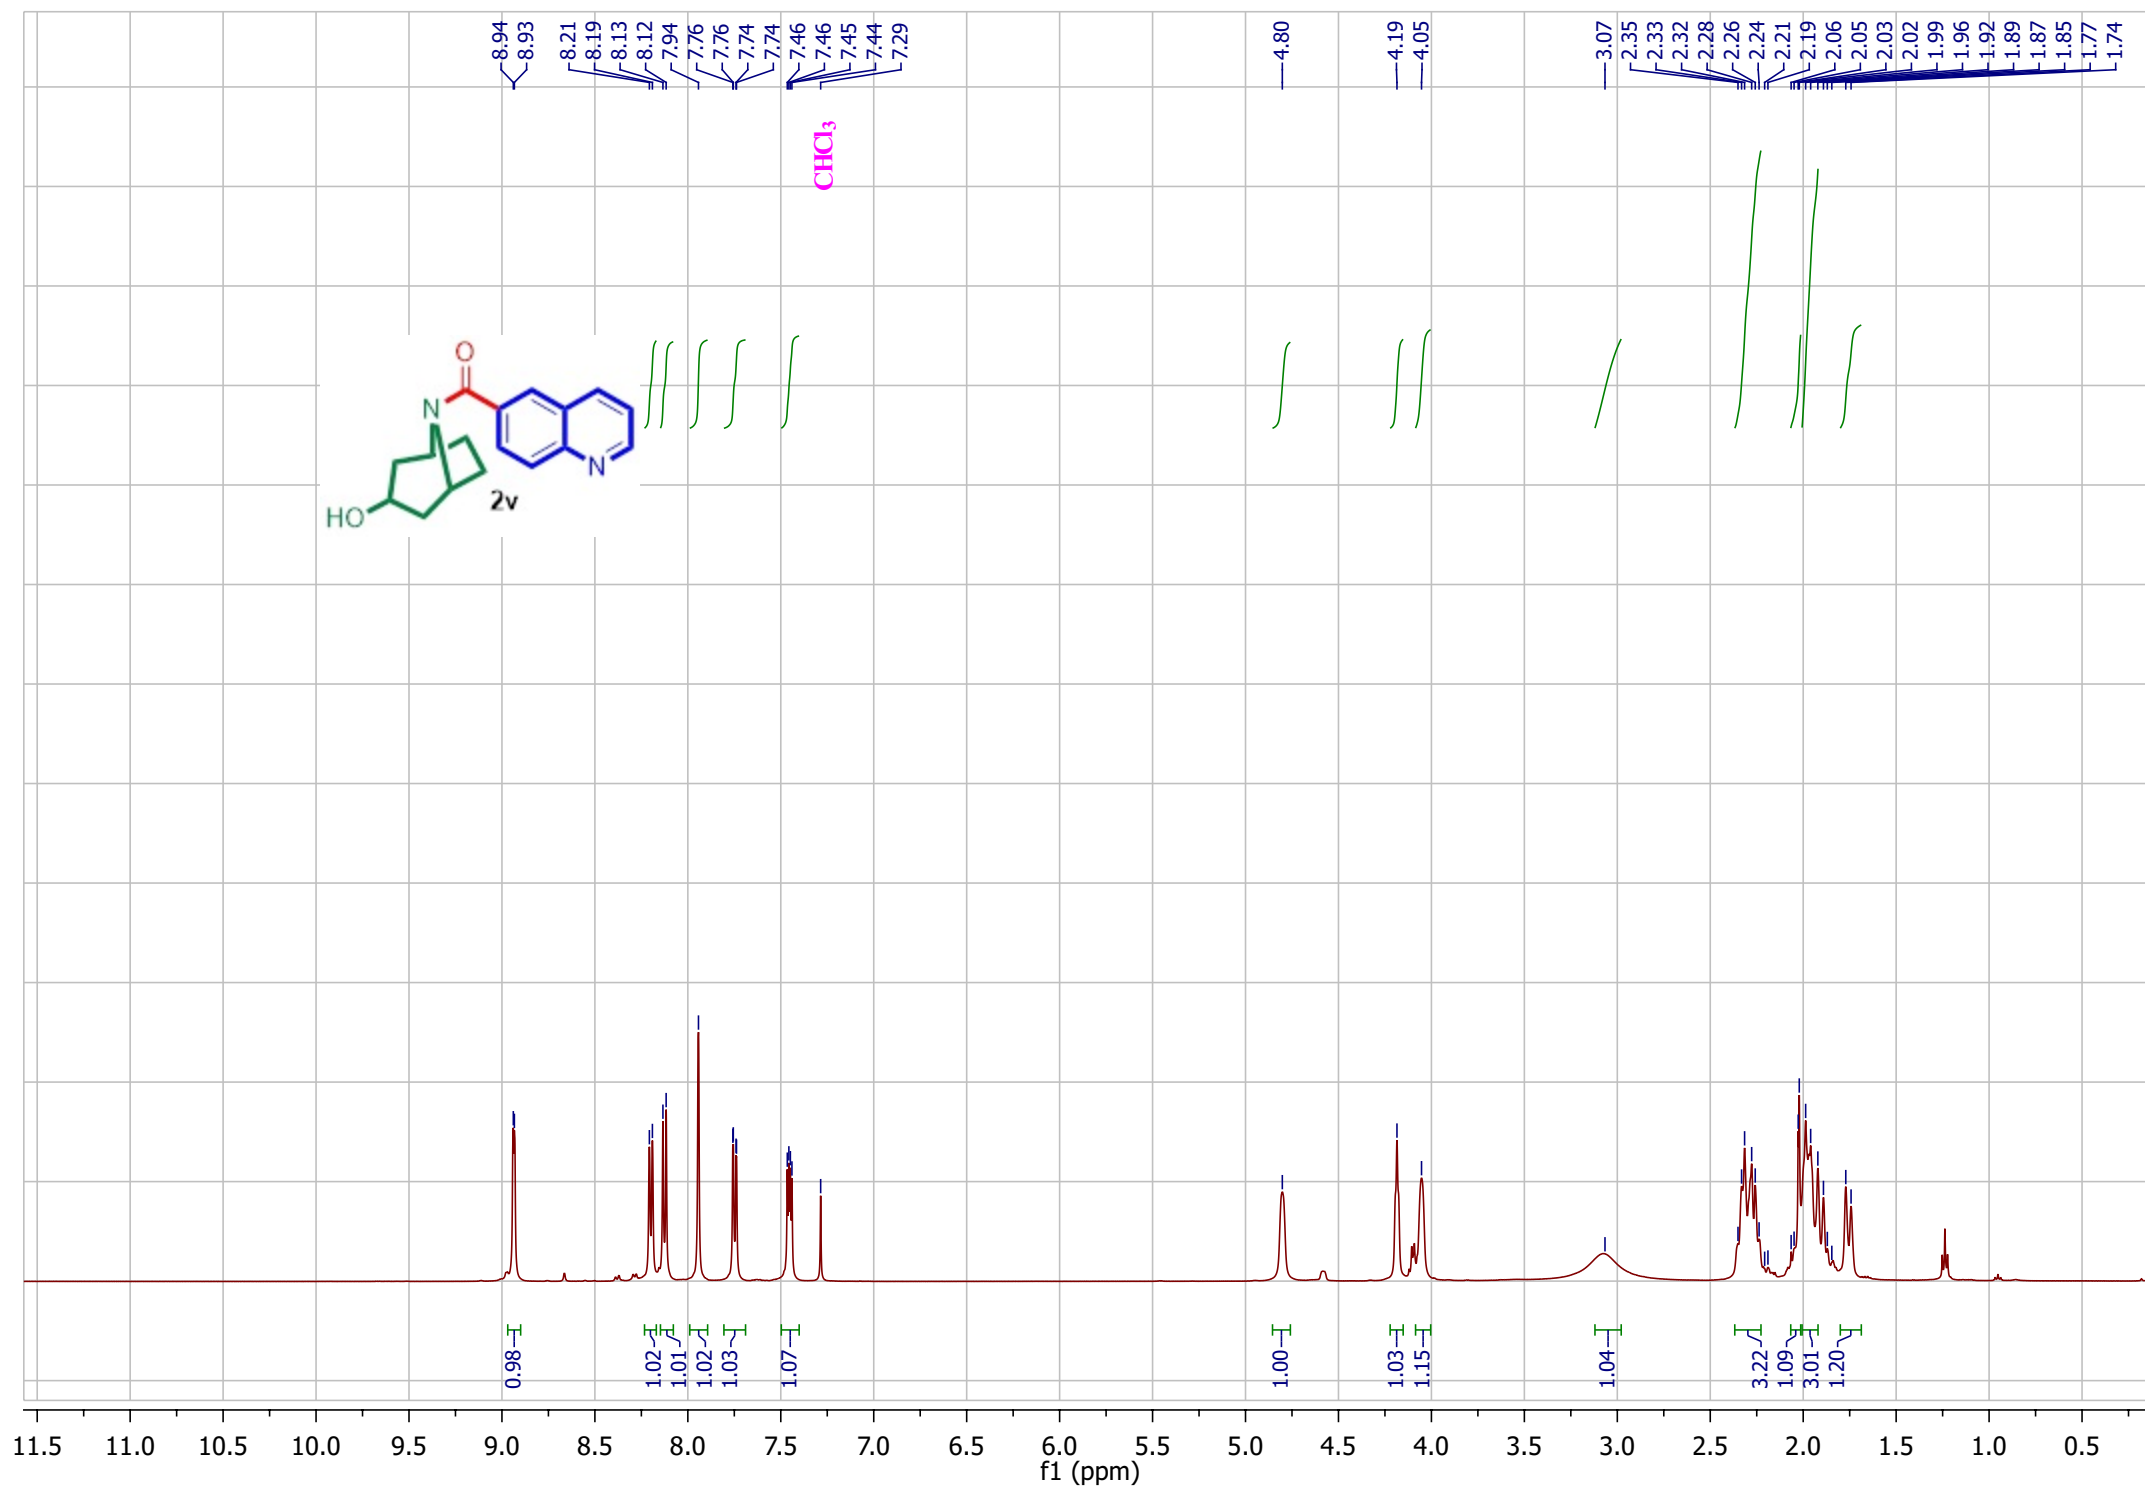

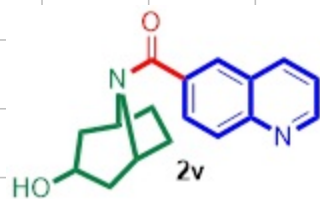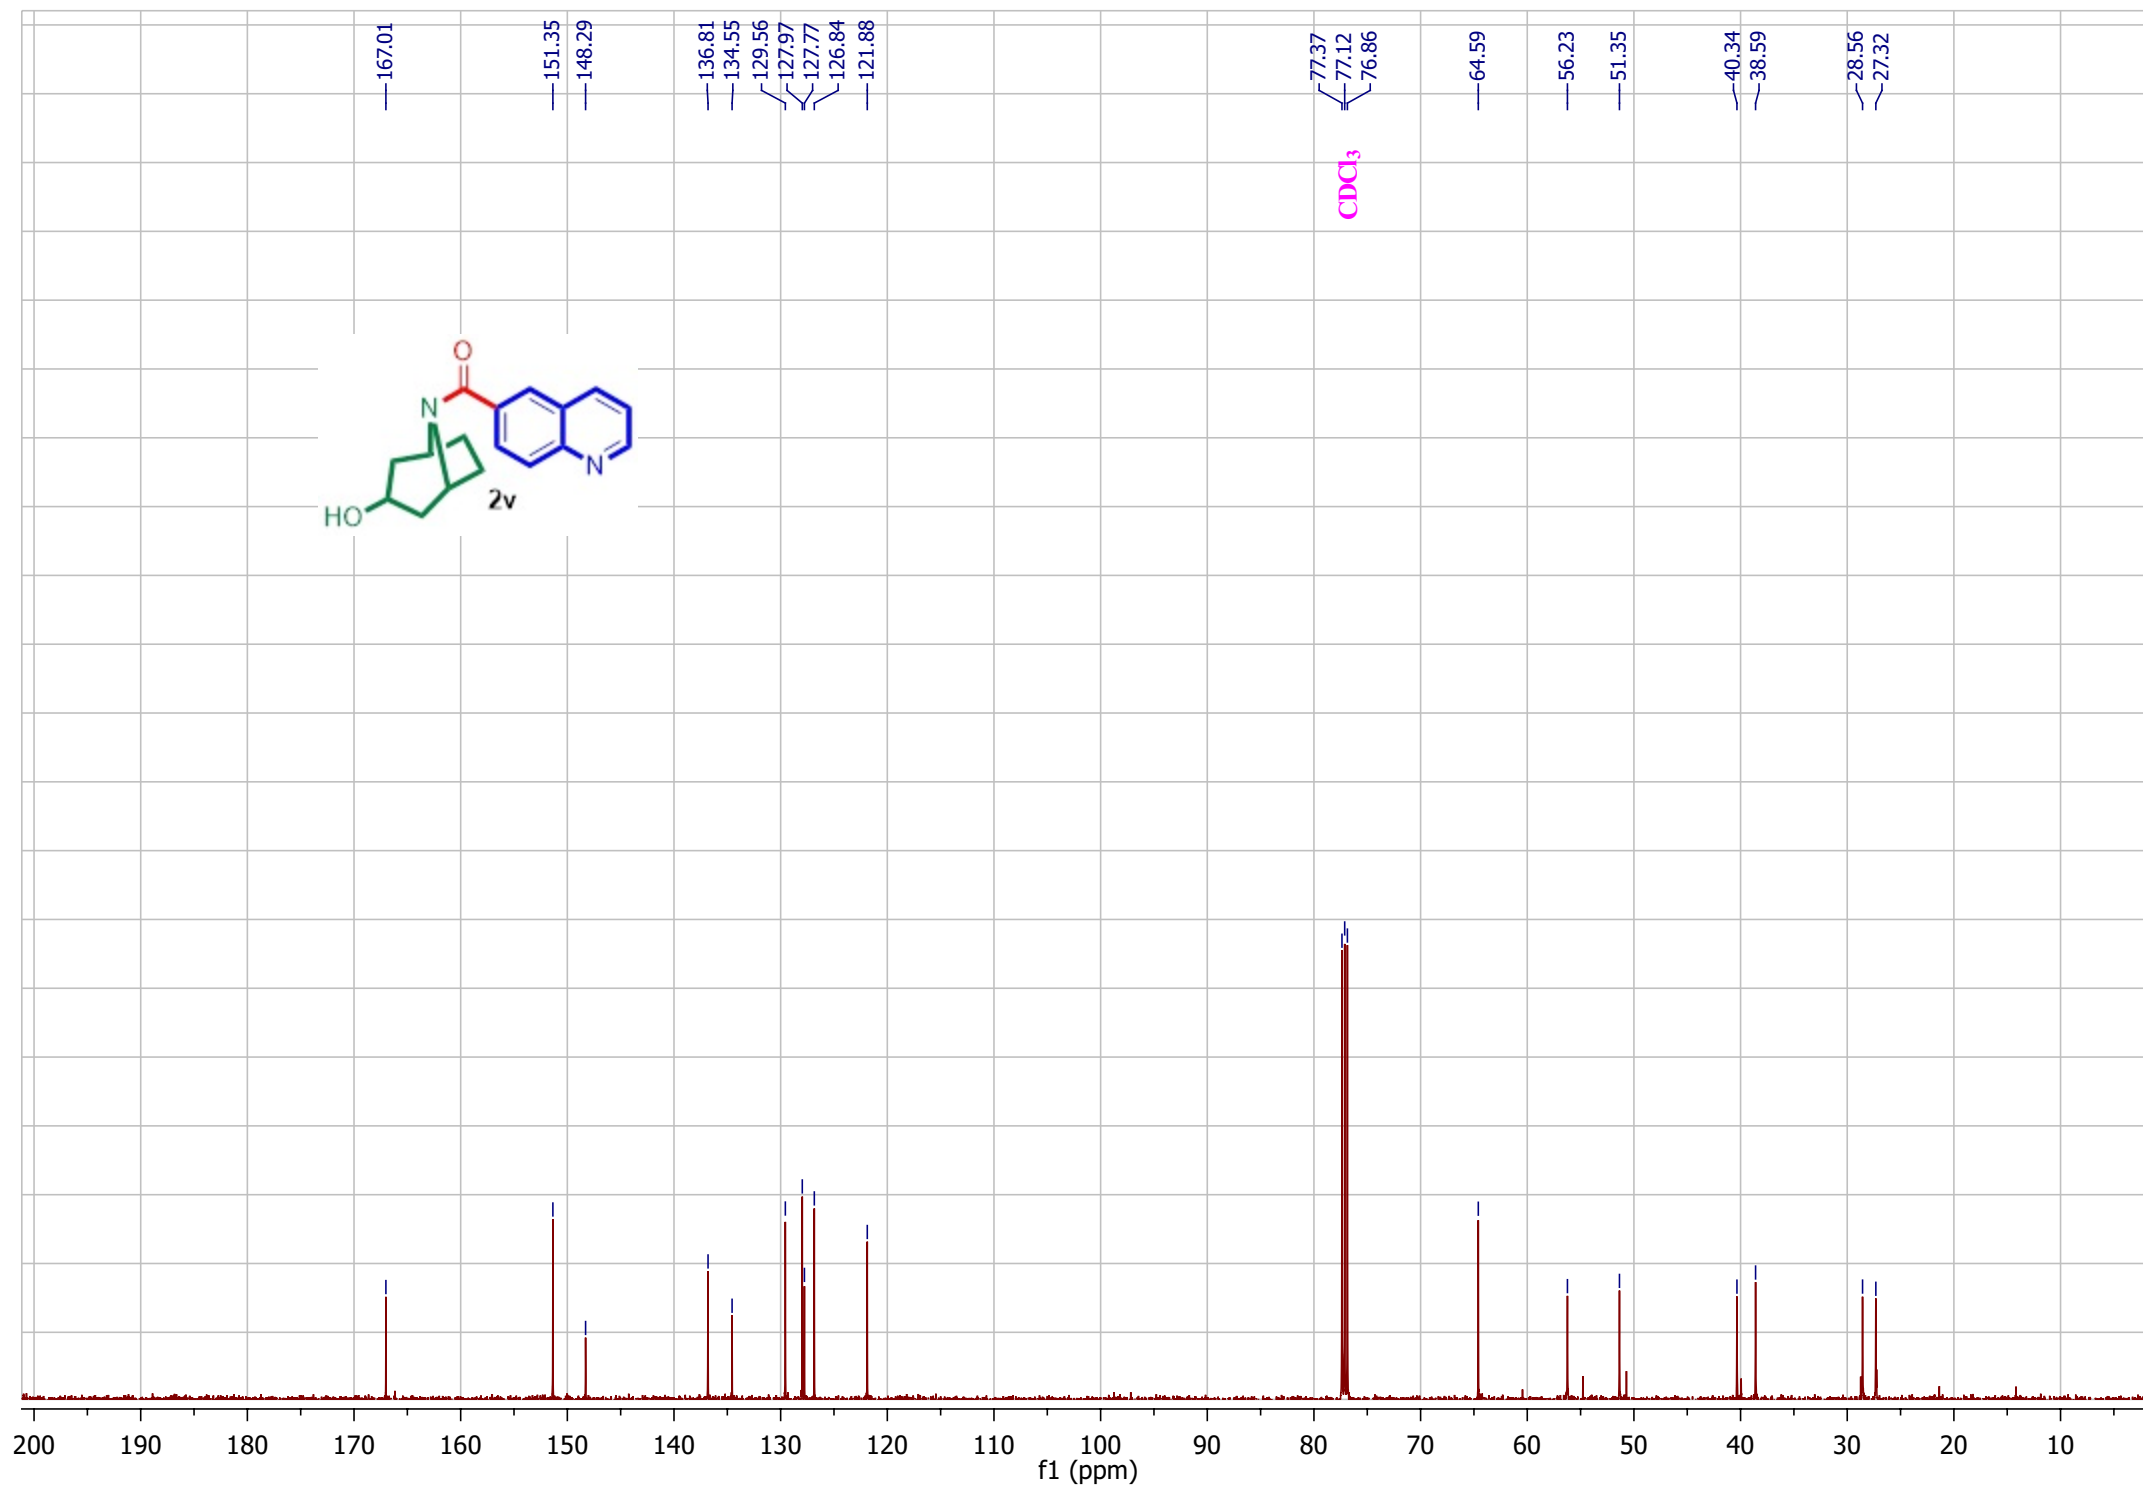

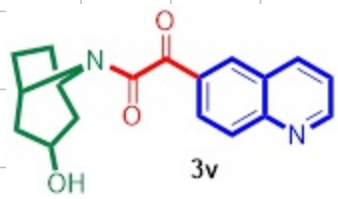

CHCl<sub>3</sub>

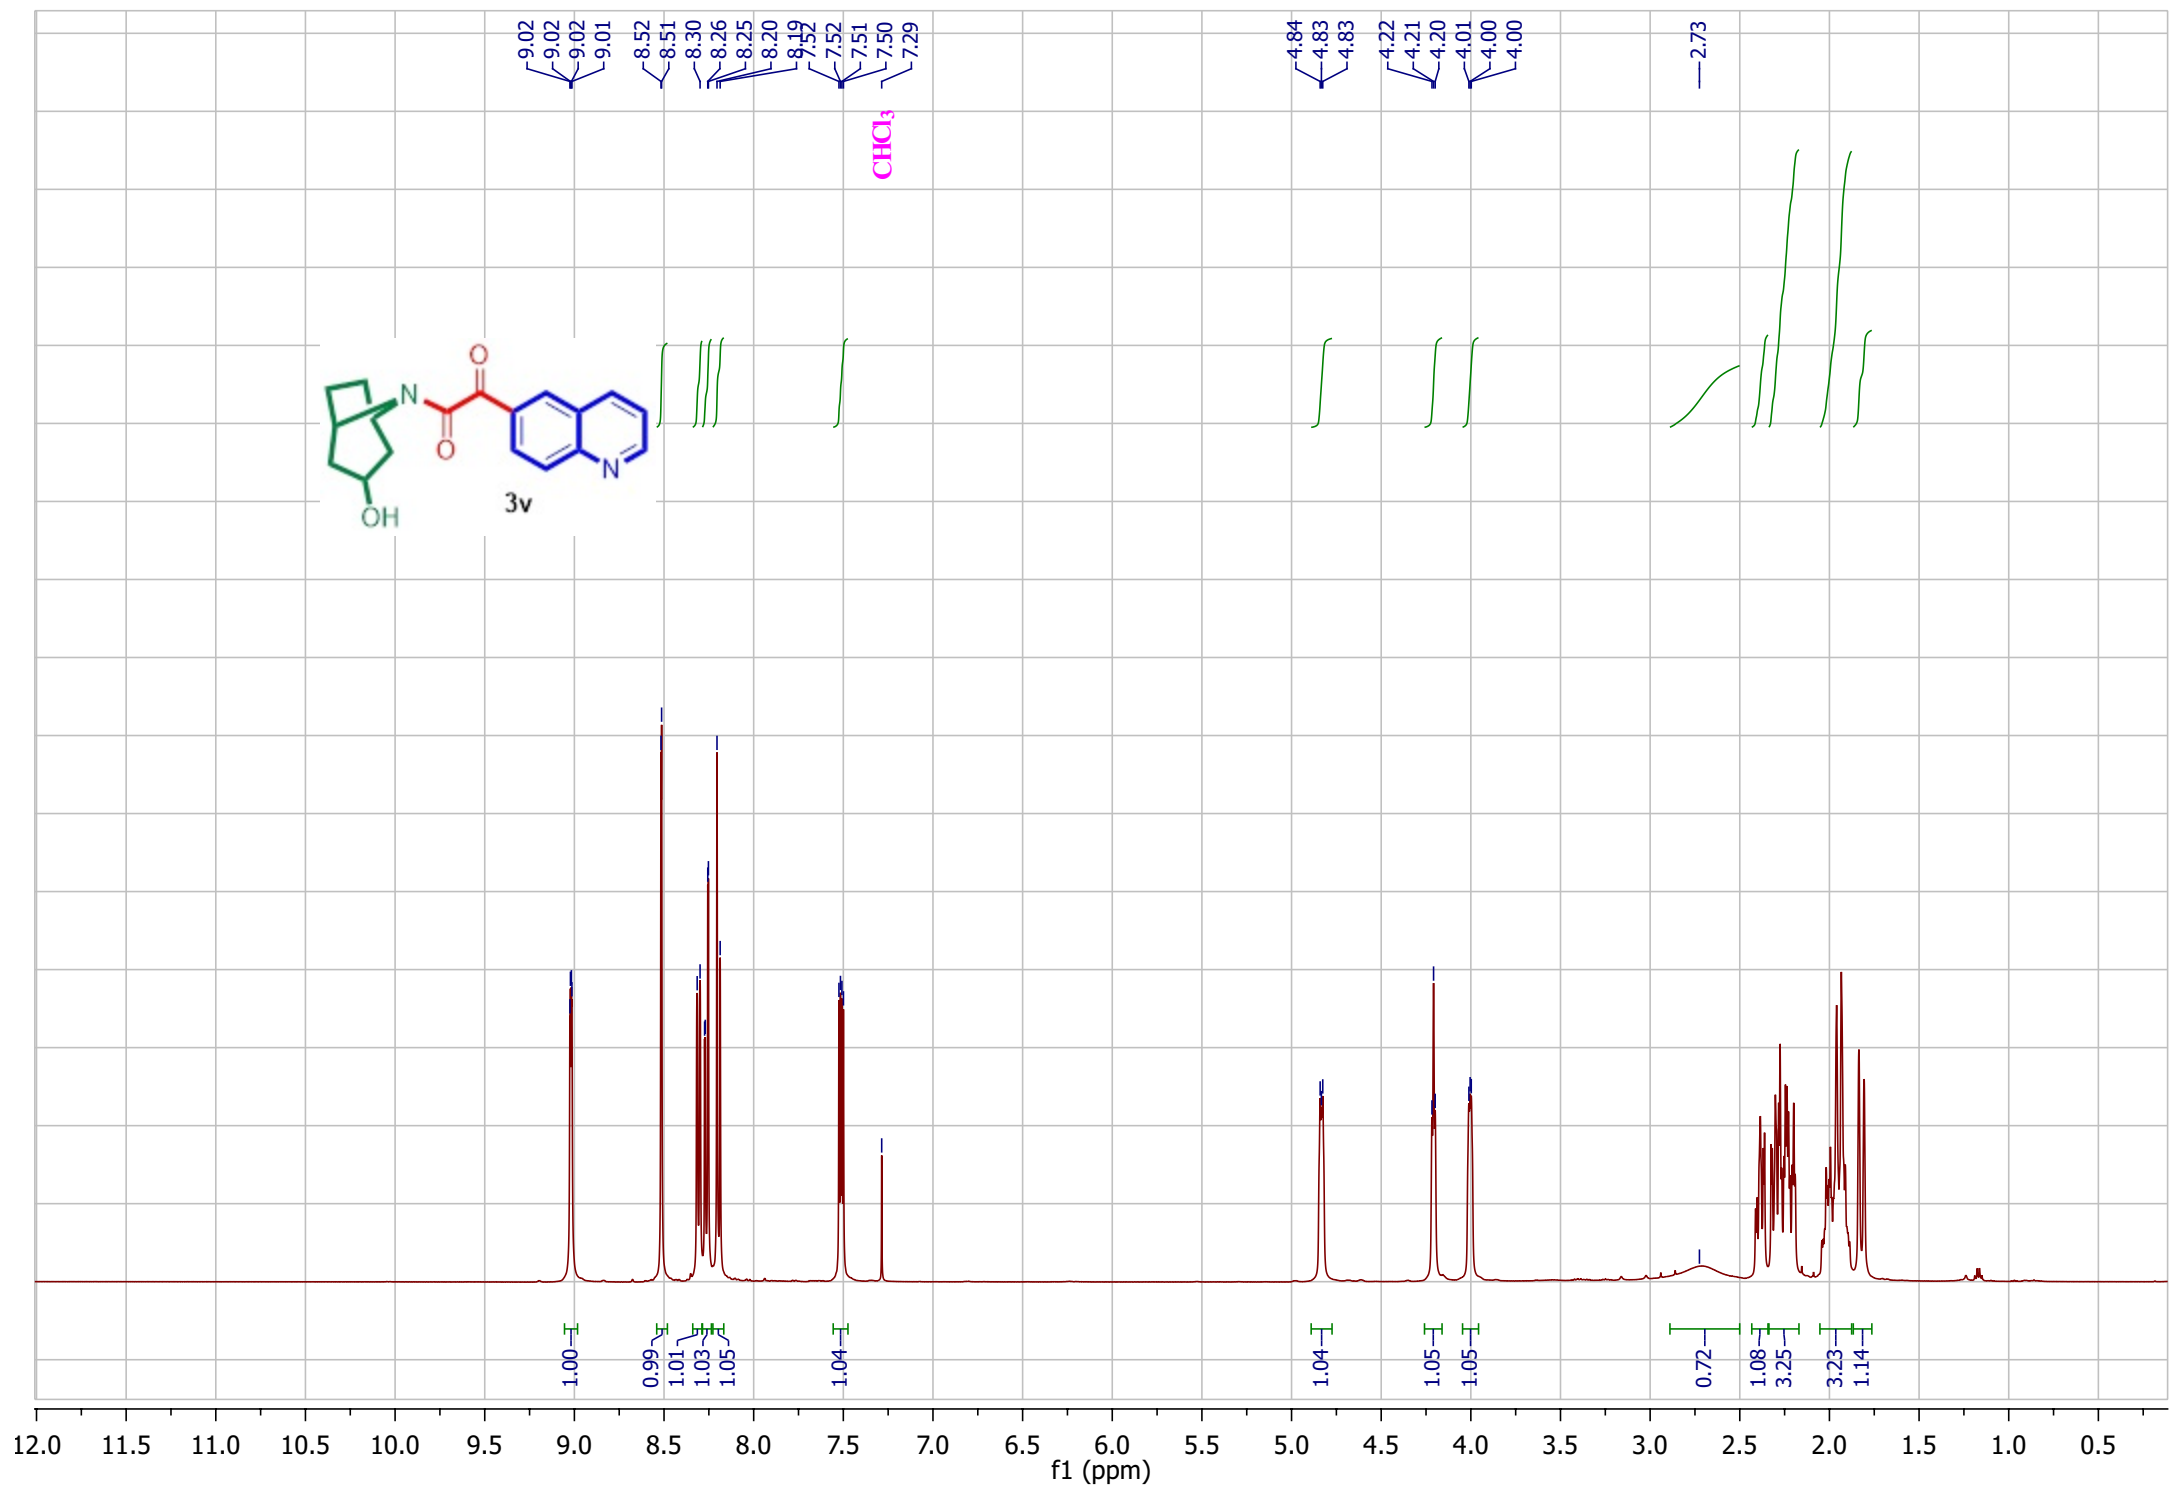



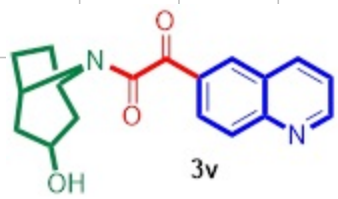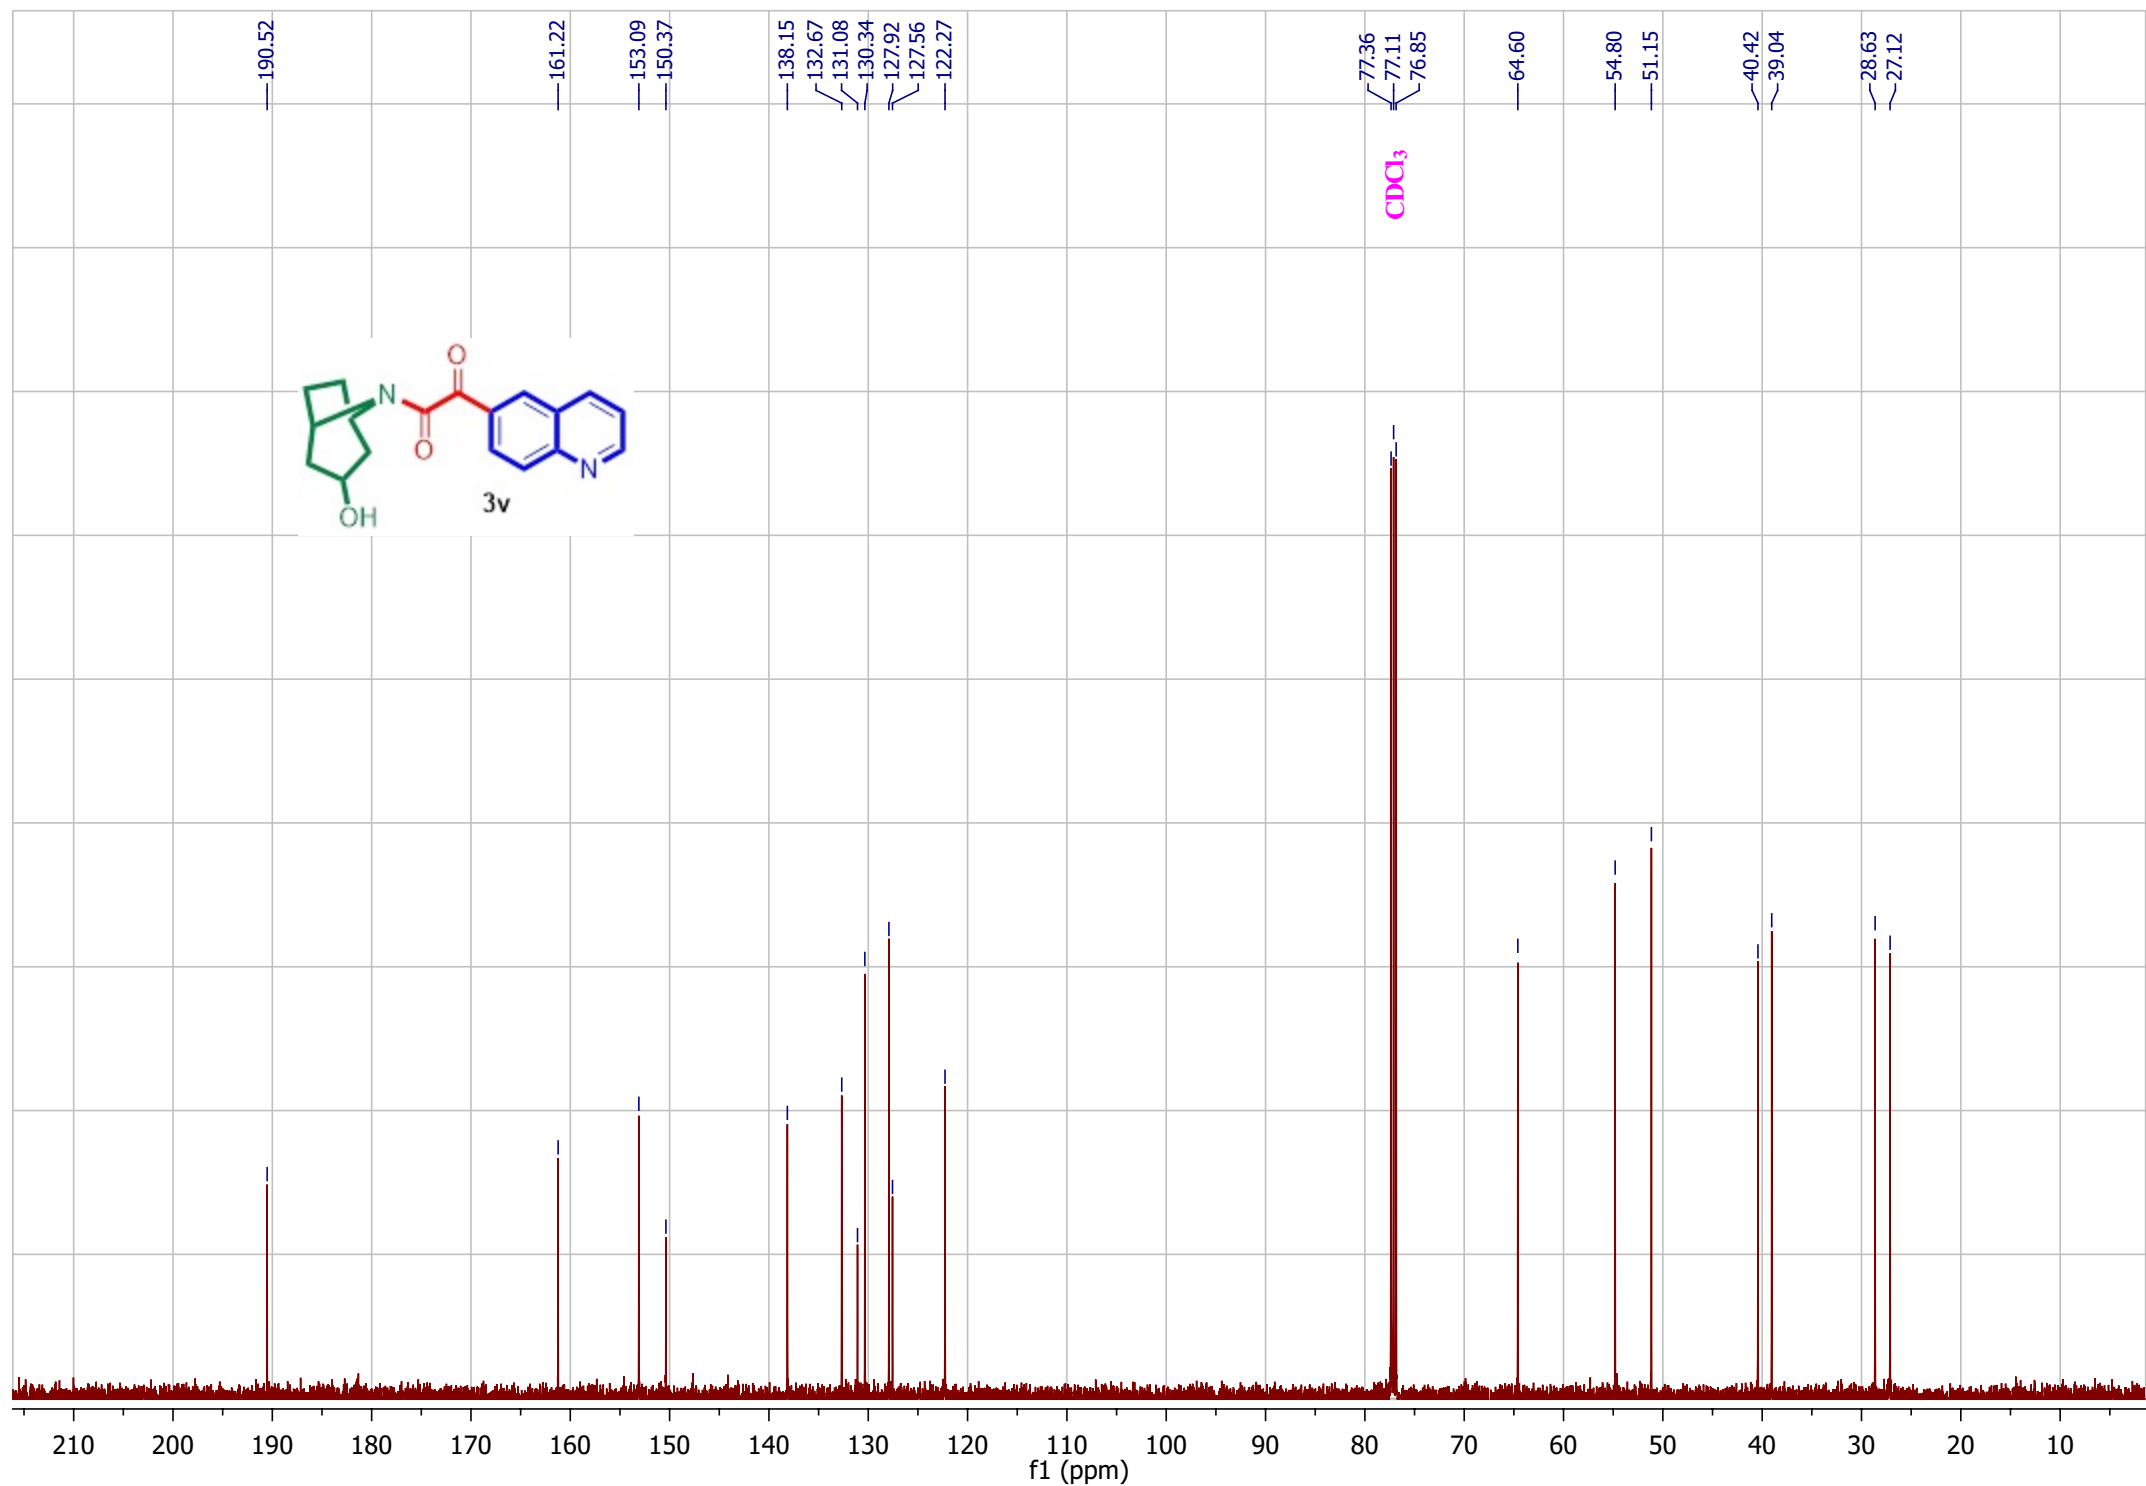

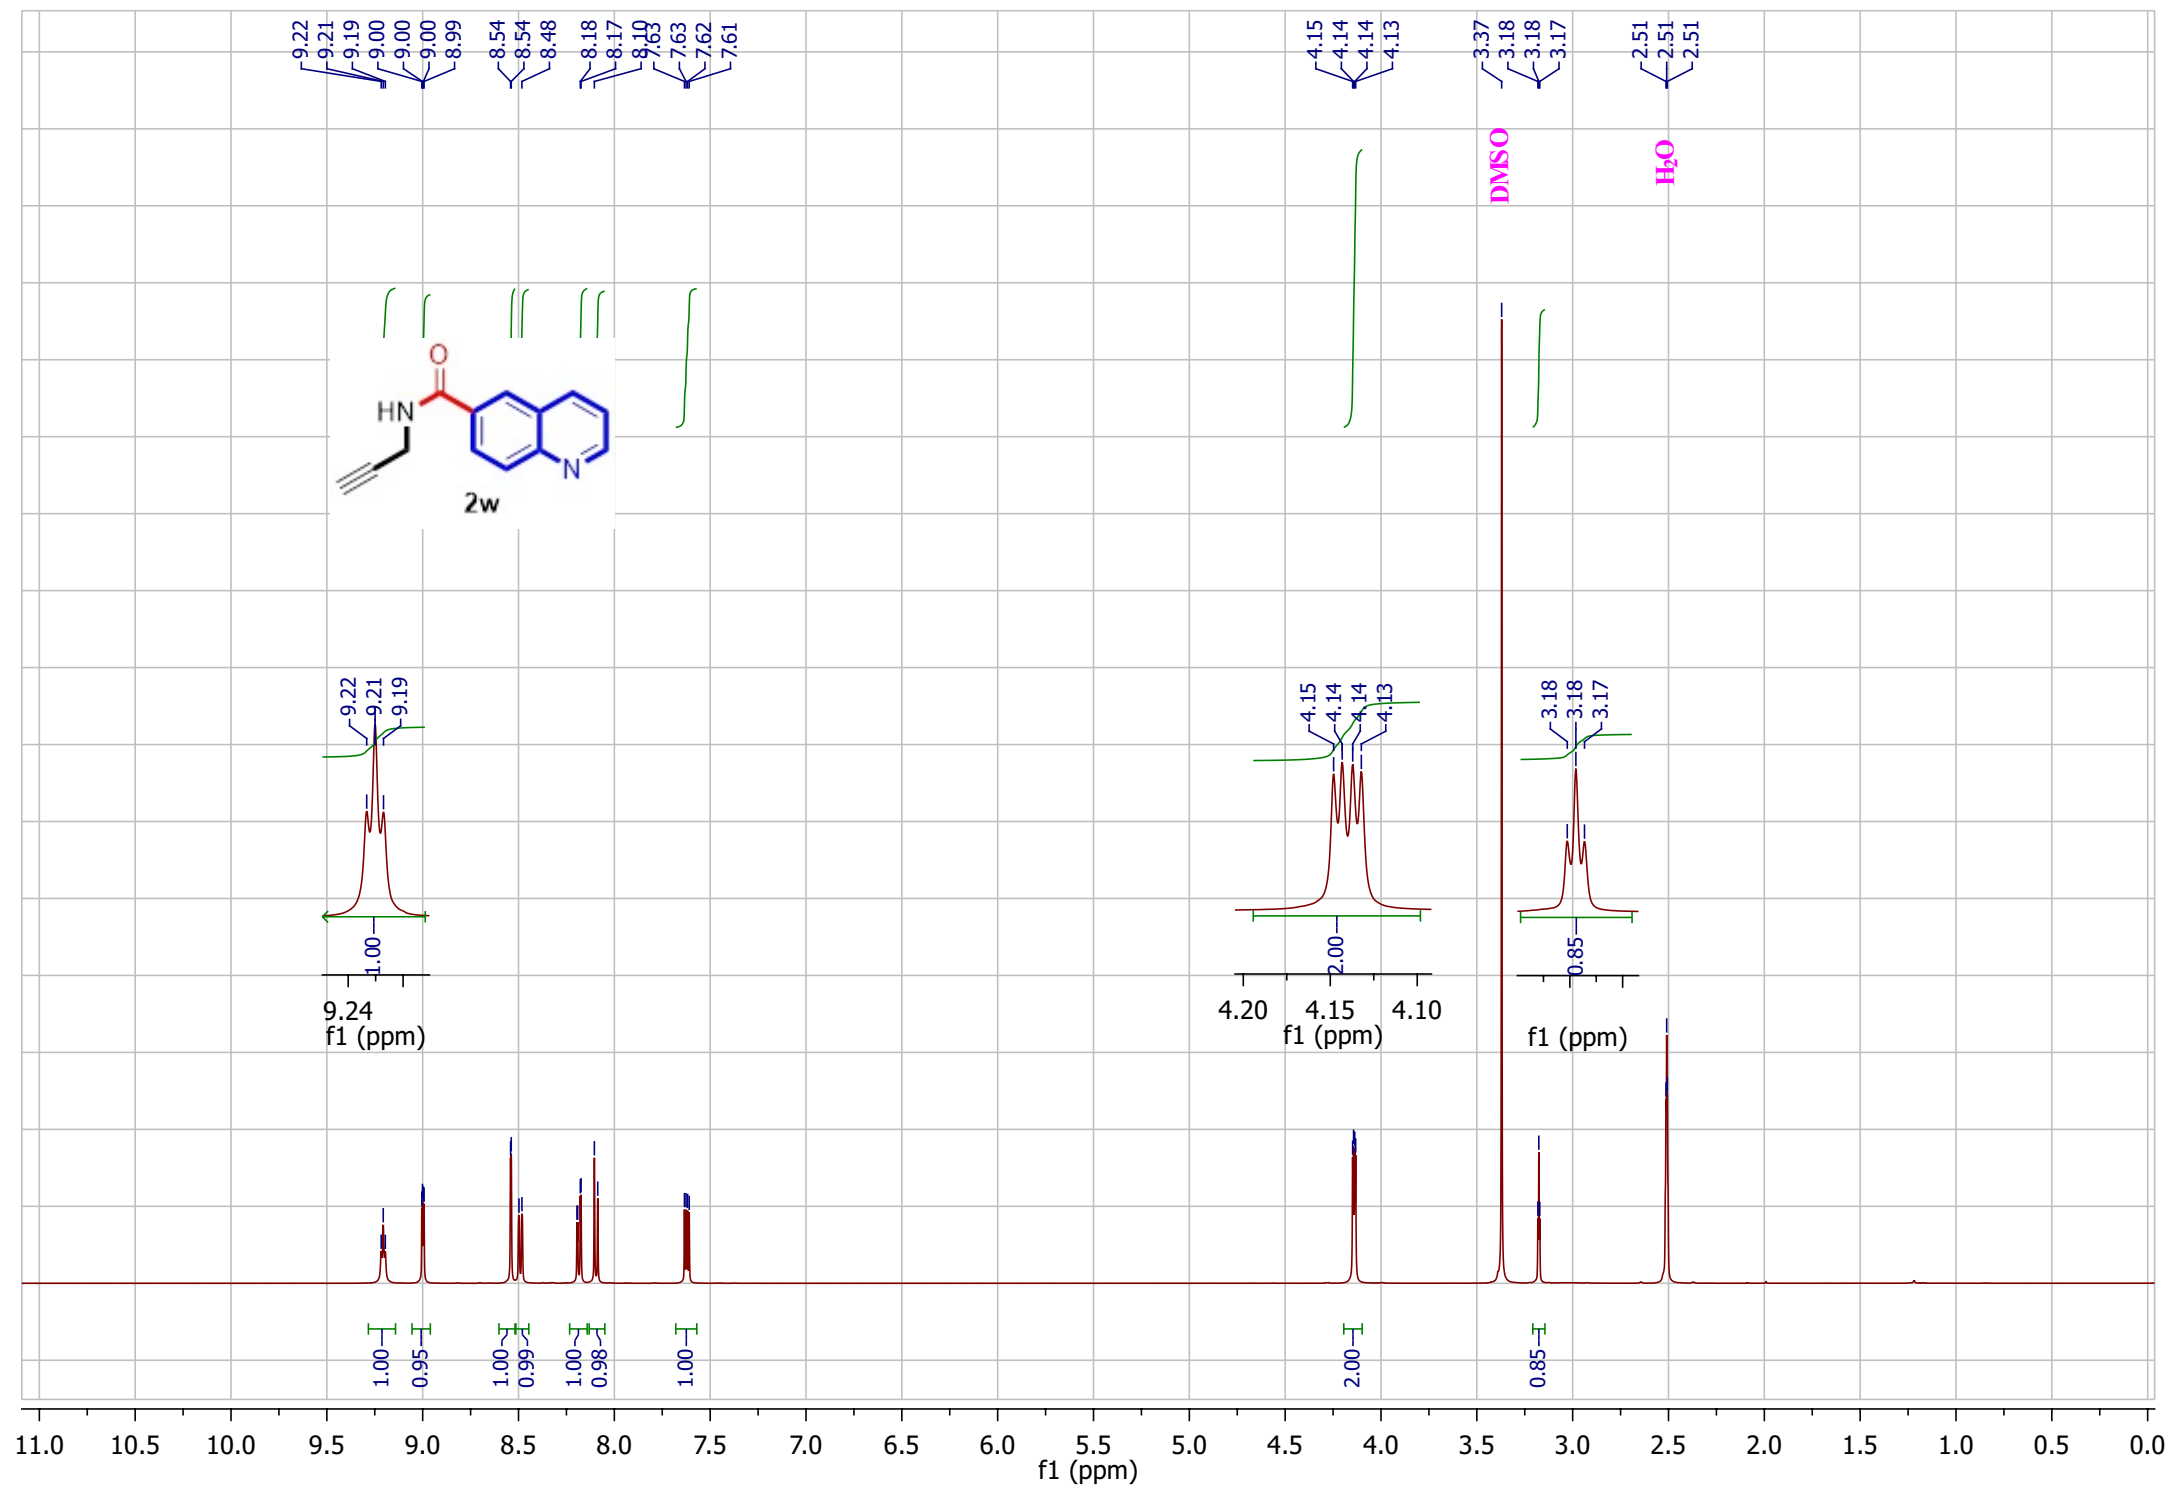

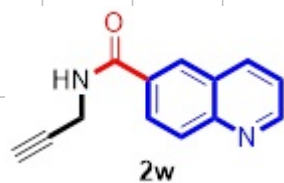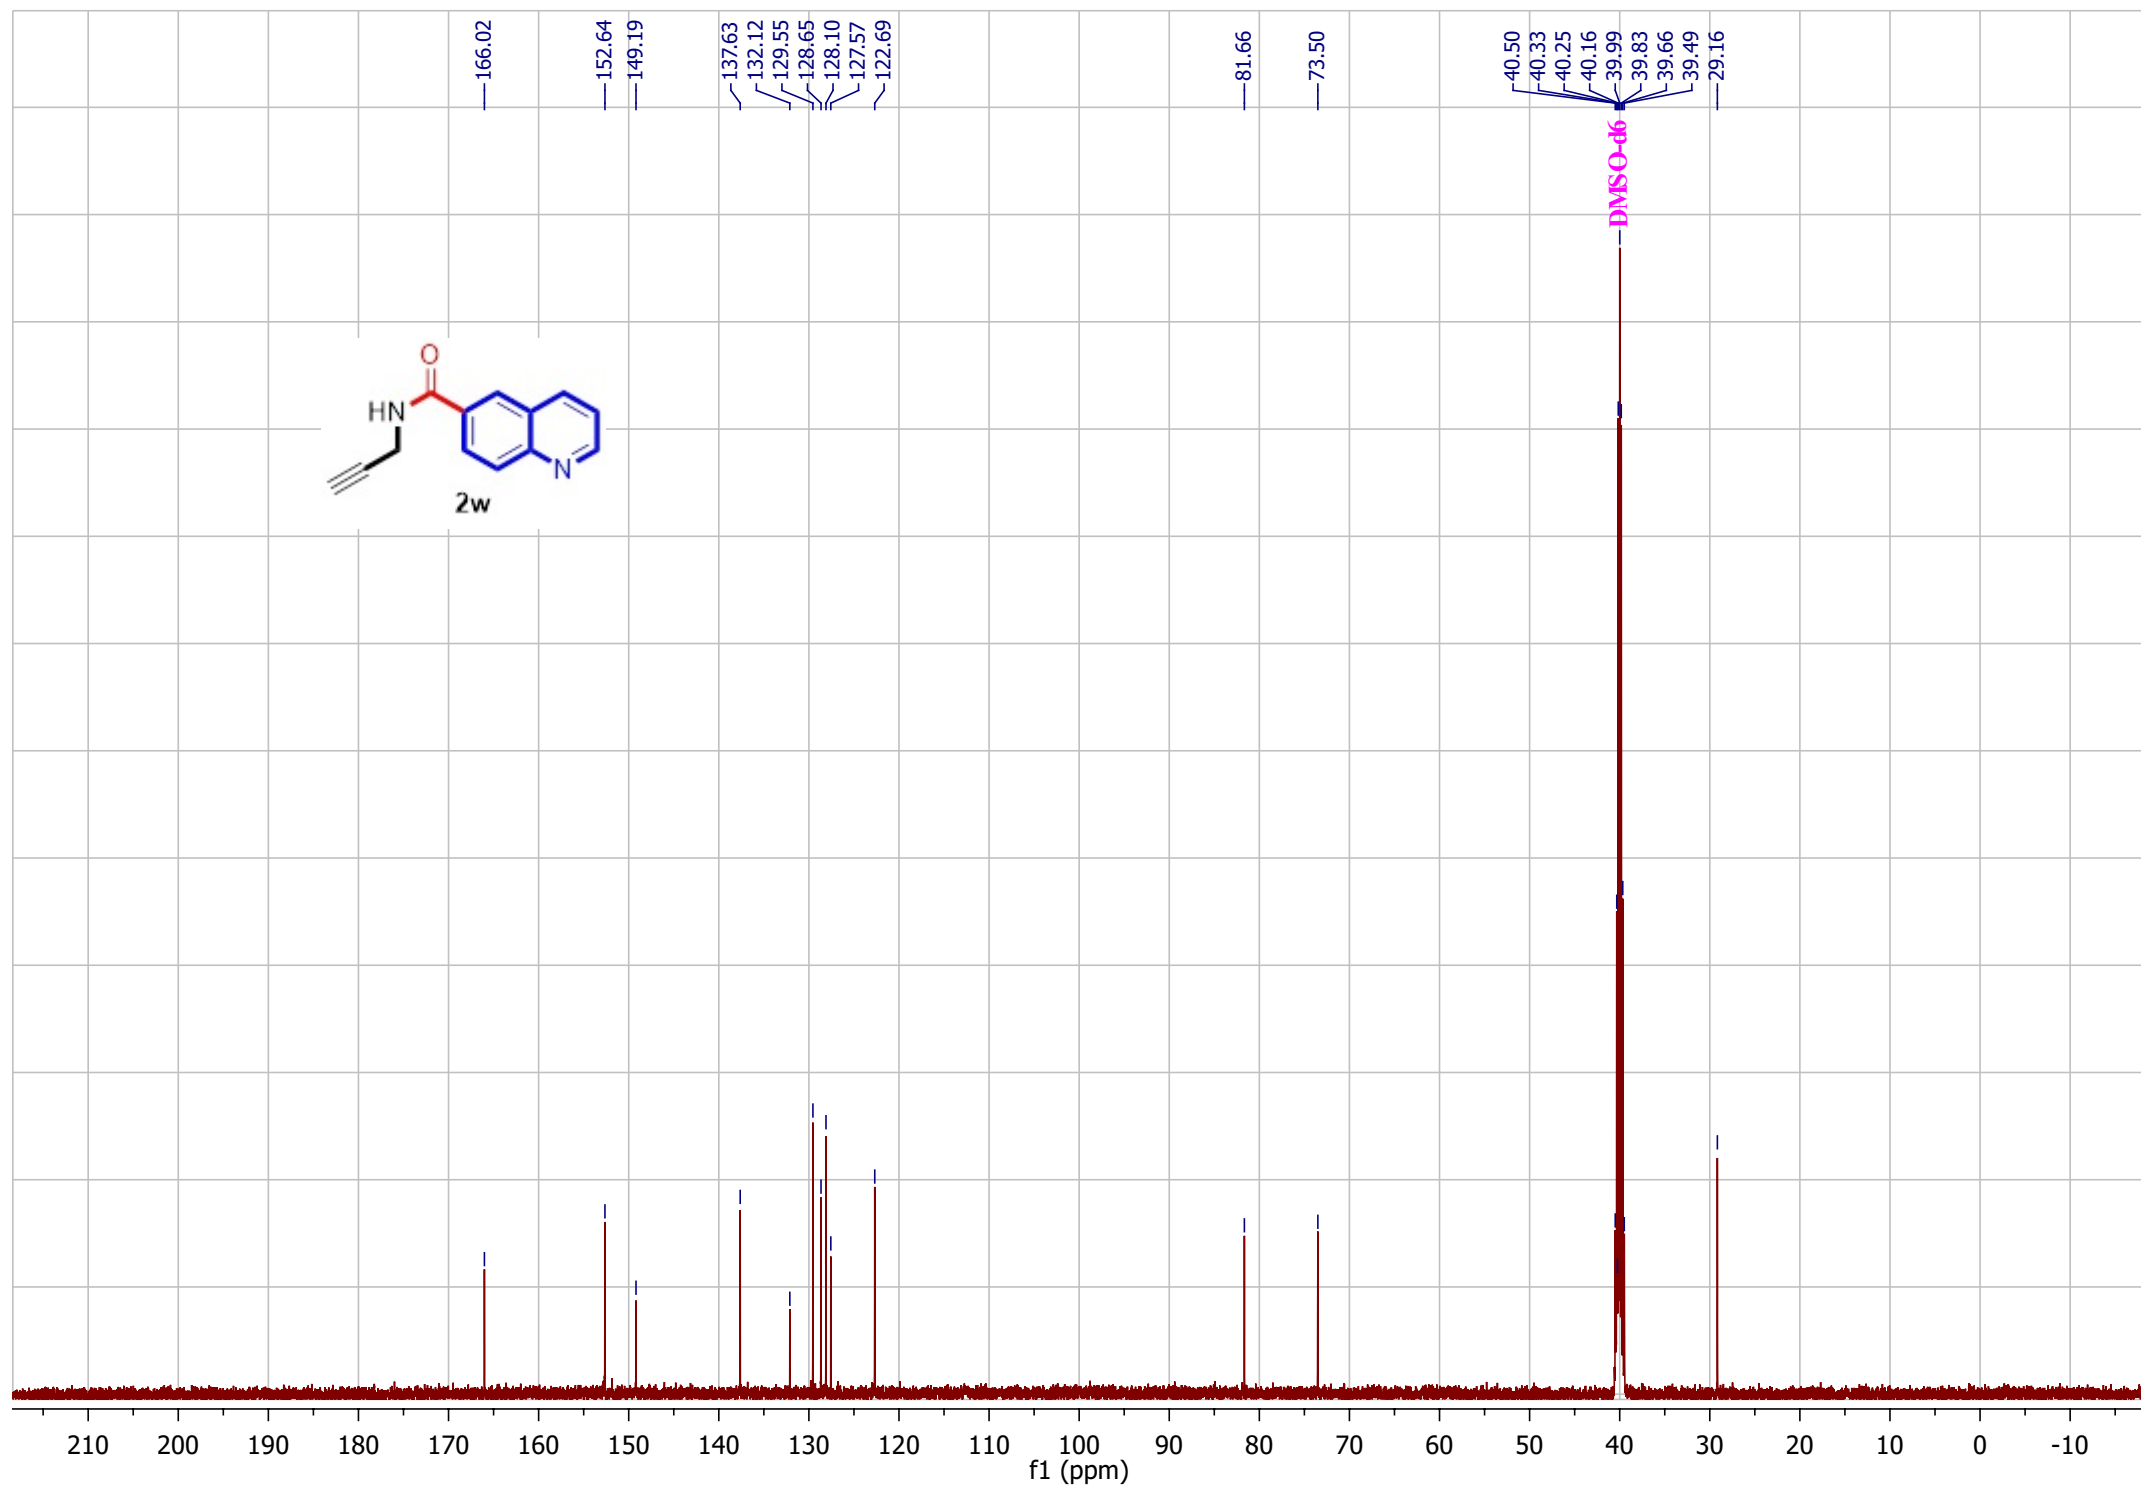

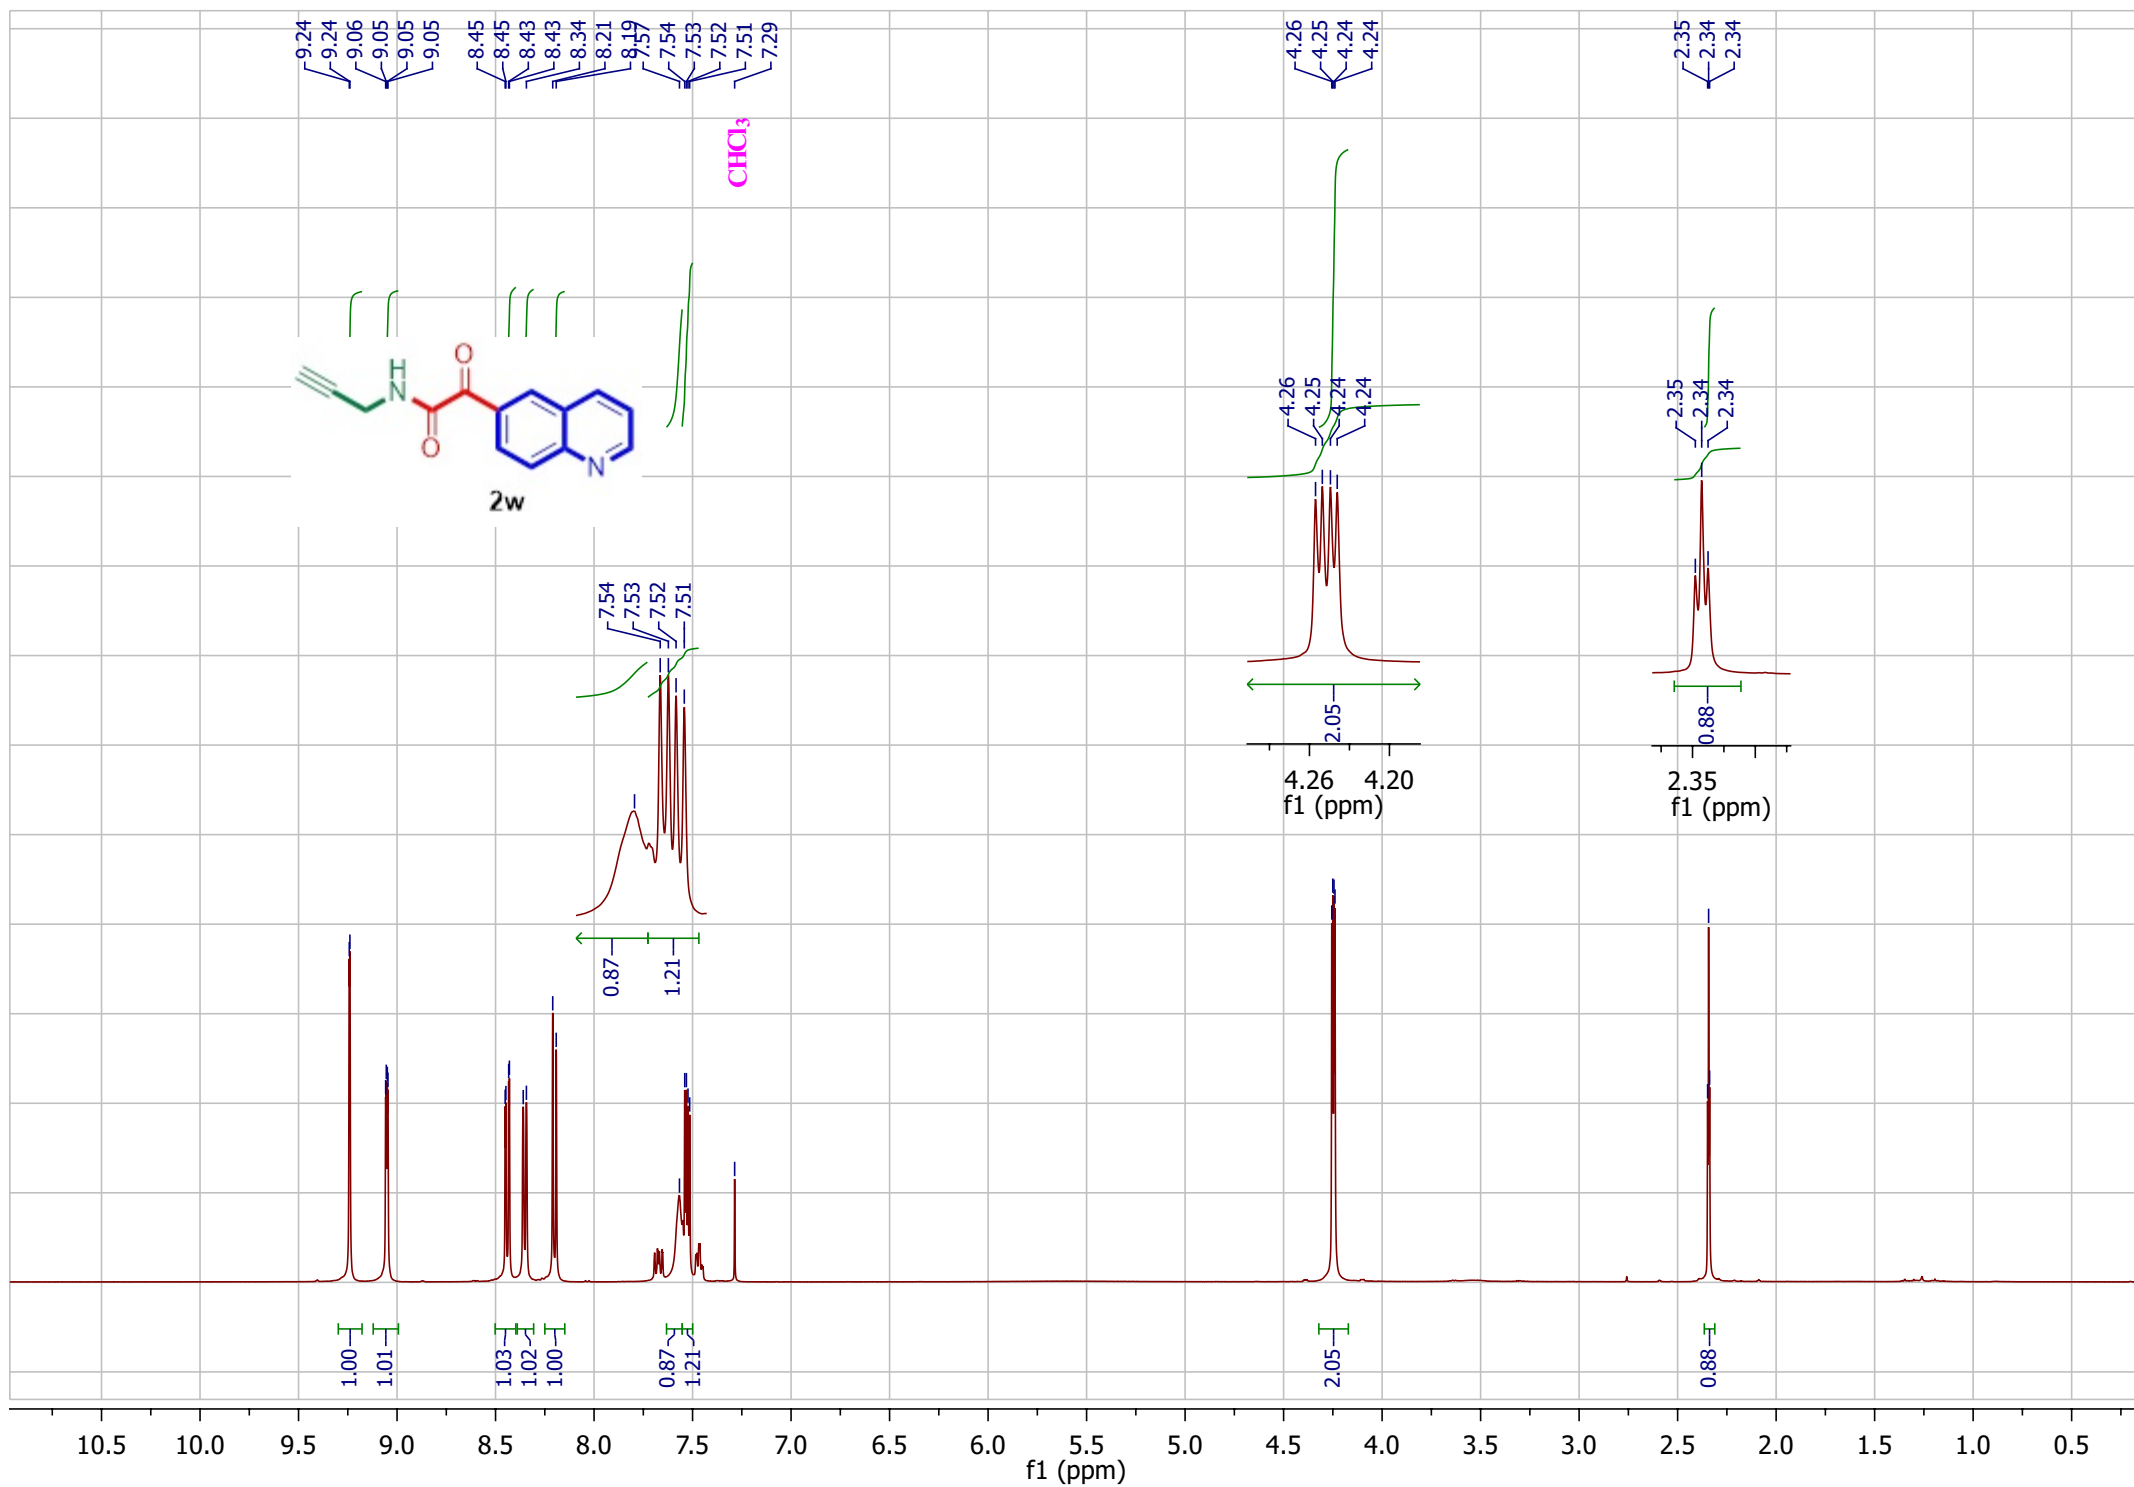

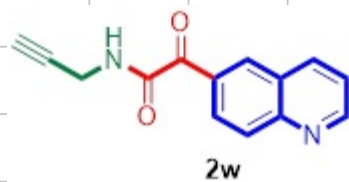

185.71

161.06

153.07

150.19

138.63

134.91

130.93

129.78

129.25

127.38

122.11

78.26

77.31

77.06

76.80

72.45

29.28

CDCl<sub>3</sub>

f1 (ppm)
