# Supplementary material for: Highly Selective Synthesis of 6-Glyoxylamidoquinoline Derivatives via Palladium-Catalyzed Aminocarbonylation
Source: MDPI journal article supplement (doi:10.3390/molecules27010004), 2021-12-21
Supplement: s1 [file s1]

No syntax errors found.  
Please wait while processing ....

[CIF dictionary](#)  
[Interpreting this report](#)

## Datablock: 3g

Bond precision: C-C = 0.0070 Å Wavelength=0.71073  
Cell: a=5.2074(9) b=11.0289(18) c=16.859(3)  
alpha=79.495(10) beta=86.693(11) gamma=89.903(9)  
Temperature: 300 K

|                                                    | Calculated         | Reported      |
|----------------------------------------------------|--------------------|---------------|
| Volume                                             | 950.4(3)           | 950.4(3)      |
| Space group                                        | P -1               | P -1          |
| Hall group                                         | -P 1               | -P 1          |
| Moiety formula                                     | C21 H28 N2 O2      | C21 H28 N2 O2 |
| Sum formula                                        | C21 H28 N2 O2      | C21 H28 N2 O2 |
| Mr                                                 | 340.45             | 340.45        |
| Dx, g cm <sup>-3</sup>                             | 1.190              | 1.190         |
| Z                                                  | 2                  | 2             |
| Mu (mm <sup>-1</sup> )                             | 0.076              | 0.076         |
| F000                                               | 368.0              | 368.0         |
| F000'                                              | 368.15             |               |
| h, k, lmax                                         | 6, 13, 20          | 6, 13, 20     |
| Nref                                               | 3620               | 3507          |
| Tmin, Tmax                                         | 0.985, 0.995       | 0.420, 0.990  |
| Tmin'                                              | 0.960              |               |
| Correction method= # Reported T Limits: Tmin=0.420 |                    |               |
| Tmax=0.990 AbsCorr = MULTI-SCAN                    |                    |               |
| Data completeness= 0.969                           | Theta(max)= 25.670 |               |
| R(reflections)= 0.1429( 2145)                      | wR2(reflections)=  |               |
|                                                    | 0.3591( 3507)      |               |
| S = 1.130                                          | Npar= 232          |               |

The following ALERTS were generated. Each ALERT has the format

**test-name ALERT alert-type alert-level.**

Click on the hyperlinks for more details of the test.

### Alert level B

[RINTA01](#) [ALERT 3 B](#) The value of Rint is greater than 0.18  
Rint given 0.193  
[PLAT020](#) [ALERT 3 B](#) The Value of Rint is Greater Than 0.12 ..... 0.193 Report  
[PLAT084](#) [ALERT 3 B](#) High wR2 Value (i.e. > 0.25) ..... 0.36 Report

### Alert level C

[DIFMX02](#) [ALERT 1 C](#) The maximum difference density is > 0.1\*ZMAX\*0.75  
The relevant atom site should be identified.  
[PLAT029](#) [ALERT 3 C](#) \_diffn\_measured\_fraction\_theta\_full value Low . 0.969 Why?  
[PLAT082](#) [ALERT 2 C](#) High R1 Value ..... 0.14 Report  
[PLAT097](#) [ALERT 2 C](#) Large Reported Max. (Positive) Residual Density 0.73 eA-3  
[PLAT340](#) [ALERT 3 C](#) Low Bond Precision on C-C Bonds ..... 0.00705 Ang.  
[PLAT369](#) [ALERT 2 C](#) Long C(sp2)-C(sp2) Bond C10 - C11 . 1.54 Ang.  
[PLAT906](#) [ALERT 3 C](#) Large K Value in the Analysis of Variance ..... 26.317 Check

#### And 2 other PLAT906 Alerts

More ...

[PLAT911](#) [ALERT 3 C](#) Missing FCF Refl Between Thmin & STh/L= 0.600 26 Report  
[PLAT975](#) [ALERT 2 C](#) Check Calcd Resid. Dens. 1.00A From O10 0.58 eA-3  
[PLAT975](#) [ALERT 2 C](#) Check Calcd Resid. Dens. 0.92A From N1 0.58 eA-3  
[PLAT977](#) [ALERT 2 C](#) Check Negative Difference Density on H70A -0.36 eA-3

### Alert level G

[PLAT002](#) [ALERT 2 G](#) Number of Distance or Angle Restraints on AtSite 2 Note  
[PLAT072](#) [ALERT 2 G](#) SHELXL First Parameter in WGHT Unusually Large 0.20 Report  
[PLAT172](#) [ALERT 4 G](#) The CIF-Embedded .res File Contains DFIX Records 1 Report  
[PLAT860](#) [ALERT 3 G](#) Number of Least-Squares Restraints ..... 1 Note  
[PLAT910](#) [ALERT 3 G](#) Missing # of FCF Reflection(s) Below Theta(Min). 3 Note  
[PLAT912](#) [ALERT 4 G](#) Missing # of FCF Reflections Above STh/L= 0.600 85 Note  
[PLAT913](#) [ALERT 3 G](#) Missing # of Very Strong Reflections in FCF .... 2 Note

|                         |                         |                   |                                                  |    |      |
|-------------------------|-------------------------|-------------------|--------------------------------------------------|----|------|
| <a href="#">PLAT933</a> | <a href="#">ALERT 2</a> | <a href="#">G</a> | Number of OMIT Records in Embedded .res File ... | 25 | Note |
| <a href="#">PLAT978</a> | <a href="#">ALERT 2</a> | <a href="#">G</a> | Number C-C Bonds with Positive Residual Density. | 2  | Info |

---

0 **ALERT level A** = Most likely a serious problem - resolve or explain  
 3 **ALERT level B** = A potentially serious problem, consider carefully  
 13 **ALERT level C** = Check. Ensure it is not caused by an omission or oversight  
 9 **ALERT level G** = General information/check it is not something unexpected

1 ALERT type 1 CIF construction/syntax error, inconsistent or missing data  
 10 ALERT type 2 Indicator that the structure model may be wrong or deficient  
 12 ALERT type 3 Indicator that the structure quality may be low  
 2 ALERT type 4 Improvement, methodology, query or suggestion  
 0 ALERT type 5 Informative message, check

---

It is advisable to attempt to resolve as many as possible of the alerts in all categories. Often the minor alerts point to easily fixed oversights, errors and omissions in your CIF or refinement strategy, so attention to these fine details can be worthwhile. In order to resolve some of the more serious problems it may be necessary to carry out additional measurements or structure refinements. However, the purpose of your study may justify the reported deviations and the more serious of these should normally be commented upon in the discussion or experimental section of a paper or in the "special details" fields of the CIF. checkCIF was carefully designed to identify outliers and unusual parameters, but every test has its limitations and alerts that are not important in a particular case may appear. Conversely, the absence of alerts does not guarantee there are no aspects of the results needing attention. It is up to the individual to critically assess their own results and, if necessary, seek expert advice.

### Publication of your CIF in IUCr journals

A basic structural check has been run on your CIF. These basic checks will be run on all CIFs submitted for publication in IUCr journals (*Acta Crystallographica*, *Journal of Applied Crystallography*, *Journal of Synchrotron Radiation*); however, if you intend to submit to *Acta Crystallographica Section C* or *E* or *IUCrData*, you should make sure that [full publication checks](#) are run on the final version of your CIF prior to submission.

### Publication of your CIF in other journals

Please refer to the *Notes for Authors* of the relevant journal for any special instructions relating to CIF submission.

---

PLATON version of 13/07/2021; check.def file version of 13/07/2021

## Datablock 3g - ellipsoid plot

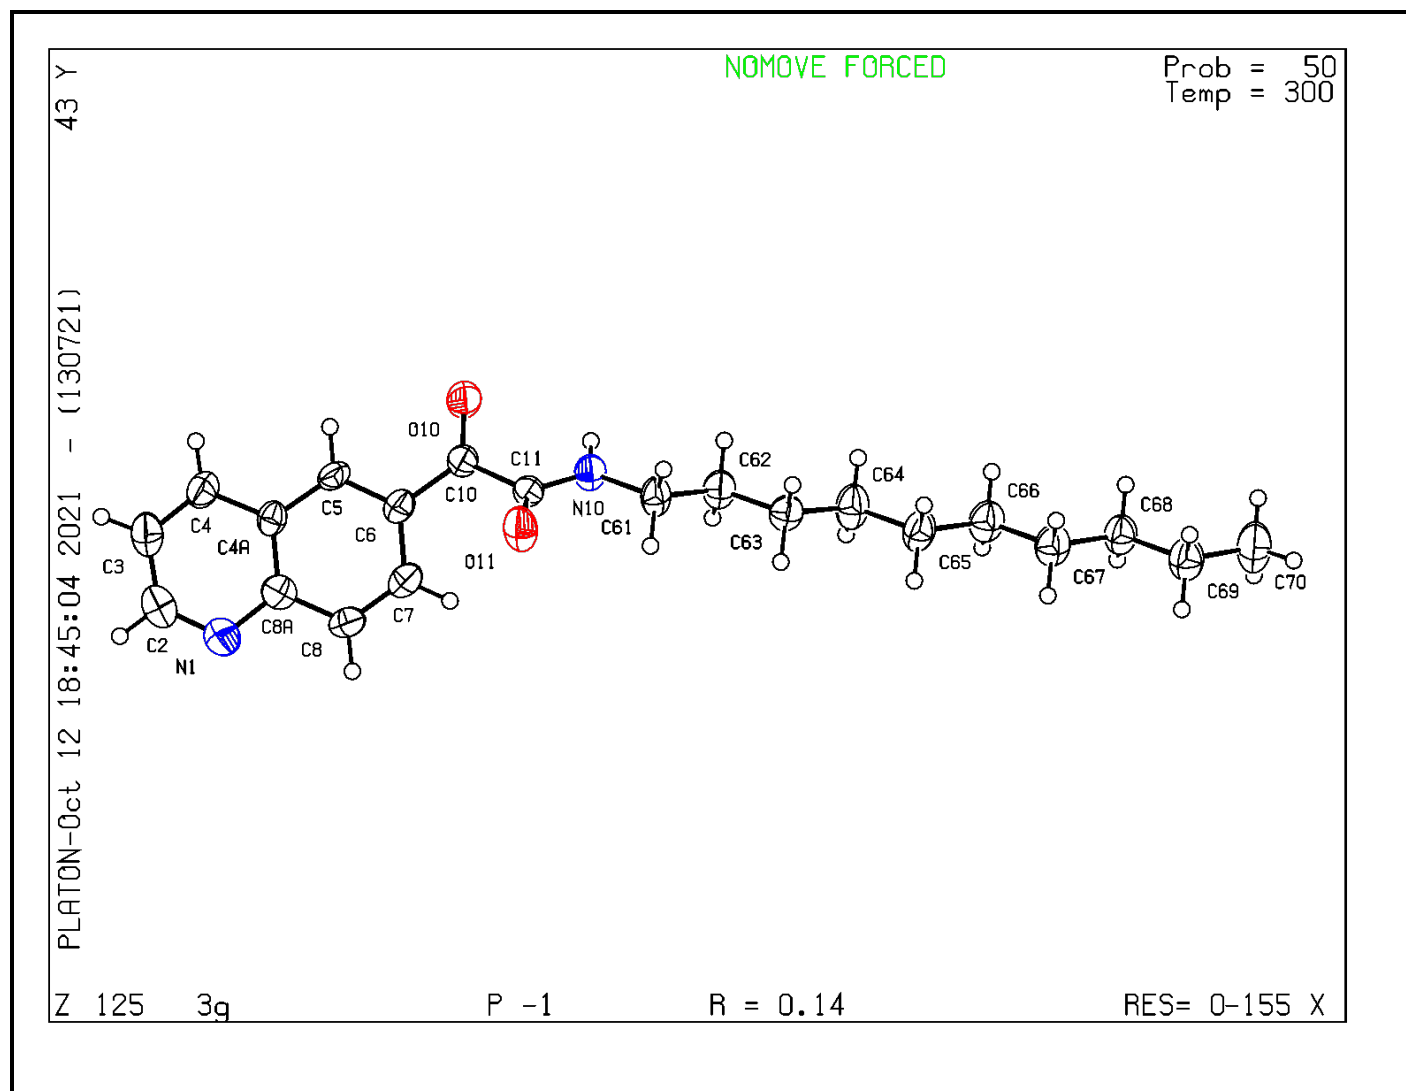

[Download CIF editor \(publCIF\) from the IUCr](#)  
[Download CIF editor \(enCIFer\) from the CCDC](#)  
[Test a new CIF entry](#)
